# Supplementary material for: Neuronal TORC1 modulates longevity via AMPK and cell nonautonomous regulation of mitochondrial dynamics in C. elegans
Source: eLife journal article supplement (doi:10.7554/elife.49158), 2019-08-14
Supplement: supp [file elife-49158-supp-v1.zip]

Archive with 35 entries (35 files):
- elife_poa_e49158_Figure_1_figure_supplement_1.pdf
- elife_poa_e49158_Figure_4_source_data_1.xlsx
- elife_poa_e49158_Figure_3_source_data_1.xlsx
- elife_poa_e49158_Figure_4_source_data_4.xlsx
- elife_poa_e49158_Supplemental_file_4.xlsx
- elife_poa_e49158_Figure_2_figure_supplement_3.pdf
- elife_poa_e49158_Supplemental_file_5.xlsx
- elife_poa_e49158_Supplemental_file_6.xlsx
- elife_poa_e49158_Figure_4_figure_supplement_1.pdf
- elife_poa_e49158_Supplemental_file_7.xlsx
- elife_poa_e49158_Figure_1_source_data_1.xlsx
- elife_poa_e49158_Figure_3_figure_supplement_1.pdf
- elife_poa_e49158_Figure_2_source_data_2.xlsx
- elife_poa_e49158_Supplemental_file_3.pdf
- elife_poa_e49158_Figure_2_figure_supplement_2.pdf
- elife_poa_e49158_Figure_4_source_data_3.xlsx
- elife_poa_e49158_Figure_2_source_data_1.xlsx
- elife_poa_e49158_Figure_1_source_data_2.xlsx
- elife_poa_e49158_Figure_3_figure_supplement_3.pdf
- elife_poa_e49158_Figure_4_source_data_2.xlsx
- elife_poa_e49158_Source_code_file_1.rtf
- elife_poa_e49158_Figure_3_source_data_2.xlsx
- elife_poa_e49158_Figure_4_figure_supplement_6.pdf
- elife_poa_e49158_Supplemental_file_2.xlsm
- elife_poa_e49158_Transparent_Reporting_File.docx
- elife_poa_e49158_Figure_1_source_data_3.xlsx
- elife_poa_e49158_Figure_2_figure_supplement_1.pdf
- elife_poa_e49158_Supplemental_file_1.xlsx
- elife_poa_e49158_Figure_3_figure_supplement_2.pdf
- elife_poa_e49158_Figure_4_figure_supplement_4.pdf
- elife_poa_e49158_Figure_4_figure_supplement_3.pdf
- elife_poa_e49158_Figure_4_figure_supplement_2.pdf
- elife_poa_e49158_Figure_5_figure_supplement_1.pdf
- elife_poa_e49158_Figure_4_figure_supplement_5.pdf
- elife_poa_e49158_Figure_3_source_data_3.xlsx
