# Supplementary material for: Neuronal TORC1 modulates longevity via AMPK and cell nonautonomous regulation of mitochondrial dynamics in C. elegans
Source: eLife journal article supplement (doi:10.7554/elife.49158), 2019-08-14
Supplement: supp [file elife-49158-supp-v1.zip › elife_poa_e49158_Figure_1_source_data_1.xlsx]

## Sheet: Sheet1
	p-AMPK	actin	p-AMPK/actin	p-AMPK/actin_normalized
N2-1	1	1	1	1.20831
N2-2	0.72	1.03	0.699029	0.844642
N2-3	0.87	1.11	0.783784	0.947051
			0.827604	1
VC222-1	1.29	0.93	1.3871	1.67604
VC222-2	1.4	0.91	1.53846	1.85893
VC222-3	1.34	0.91	1.47253	1.77927
N2 = Wild type
VC222 = raga-1(ok386)
