# Supplementary material for: Neuronal TORC1 modulates longevity via AMPK and cell nonautonomous regulation of mitochondrial dynamics in C. elegans
Source: eLife journal article supplement (doi:10.7554/elife.49158), 2019-08-14
Supplement: supp [file elife-49158-supp-v1.zip › elife_poa_e49158_Figure_1_source_data_2.xlsx]

## Sheet: Sheet1
	p-AMPK	actin	p-AMPK/actin	p-AMPK/actin_normalized
EV-1	2.36	1	2.36	1.09134
EV-2	2.26	1.09	2.07339	0.958803
EV-3	2.28	1.11	2.05405	0.949859
			2.16248	1
TOR RNAi-1	2.4	0.79	3.03797	1.40485
TOR RNAi-2	3.45	1.24	2.78226	1.2866
TOR RNAi-3	2.68	0.82	3.26829	1.51136
EV = No RNAi
