# Supplementary material for: Neuronal TORC1 modulates longevity via AMPK and cell nonautonomous regulation of mitochondrial dynamics in C. elegans
Source: eLife journal article supplement (doi:10.7554/elife.49158), 2019-08-14
Supplement: supp [file elife-49158-supp-v1.zip › elife_poa_e49158_Figure_1_source_data_3.xlsx]

## Sheet: Sheet1
	pAMPK	FLAG	pAMPK/FLAG	pAMPK/FLAG normalized
WT1	0.98	1	0.98	0.968629
WT2	0.96	0.92	1.04348	1.03137
Mut1	1.21	0.98	1.23469	1.22037
Mut2	1.17	0.82	1.42683	1.41027
Mut3	1.15	0.76	1.51316	1.4956
Mut4	1.12	0.73	1.53425	1.51644
Mut5	1.15	0.77	1.49351	1.47618
			1.01174
