# Supplementary material for: Neuronal TORC1 modulates longevity via AMPK and cell nonautonomous regulation of mitochondrial dynamics in C. elegans
Source: eLife journal article supplement (doi:10.7554/elife.49158), 2019-08-14
Supplement: supp [file elife-49158-supp-v1.zip › elife_poa_e49158_Figure_2_source_data_2.xlsx]

## Sheet: Sheet1
	Expt 1								Expt 2
				% animals at each stage								% animals at each stage
			pre-L4	L4s	adult-sized no eggs	adults w/ eggs					pre-L4	L4s	adult-sized no eggs	adults w/ eggs
	N2	plate 1	0	0	13.6364	86.3636			N2	plate 1	0	0	8.16327	91.8367
	N2	plate 2	0	4.25532	10.6383	85.1064			N2	plate 2	0	0	12.1951	87.8049
	WBM499	plate 1	2.12766	78.7234	19.1489	0			WBM499	plate 1	0	100	0	0
	WBM499	plate 2	0	67.9245	28.3019	3.77358			WBM499	plate 2	8.33333	87.5	4.16667	0
	WBM1167	plate 1	0	0	6.38298	93.617			WBM1167	plate 1	0	0	4.44444	95.5556
	WBM1167	plate 2	0	0	4.34783	95.6522			WBM1167	plate 2	0	0	6.81818	93.1818
	WBM1168	plate 1	0	0	0	100			WBM1168	plate 1	0	0	4.44444	95.5556
	WBM1168	plate 2	0	0	0	100			WBM1168	plate 2	0	2.22222	13.3333	84.4444
	WBM1169	plate 1	2.32558	6.97674	79.0698	11.6279			WBM1169	plate 1	0	0	100	0
	WBM1169	plate 2	2.38095	11.9048	85.7143	0			WBM1169	plate 2	6.06061	6.06061	87.8788	0
	WBM1170	plate 1	0	45.8333	50	4.16667			WBM1170	plate 1	0	91.1111	6.66667	2.22222
	WBM1170	plate 2	0	45.2381	47.619	7.14286			WBM1170	plate 2	2	98	0	0
	Wild type = N2
	raga-1(ok386) = strain WBM499
	Wild type + SCIs[somatic raga-1] = strain WBM1167
	Wild type + SCIs[neuronal raga-1] = strain WBM1168
	raga-1 + SCIs[somatic raga-1] = strain WBM1169
	raga-1 + SCIs[neuronal raga-1] = strain WBM1170
