# Supplementary material for: Neuronal TORC1 modulates longevity via AMPK and cell nonautonomous regulation of mitochondrial dynamics in C. elegans
Source: eLife journal article supplement (doi:10.7554/elife.49158), 2019-08-14
Supplement: supp [file elife-49158-supp-v1.zip › elife_poa_e49158_Figure_3_source_data_2.xlsx]

## Sheet: ugt-31 relative expression
ugt-31 expression at L4 by qPCR relative to average N2
Wild type	raga-1(ok386)	neuronal rescue	SCIs[neuronal rescue]
0.969086	2.48848	3.51689	2.843
0.684333	1.45408	3.31434	4.22292
1.50789	2.9236	3.18588
Wild type = N2
raga-1(ok386) = strain WBM499
neuronal rescue = raga-1(ok386) + Ex[neuronal raga-1] = strain WBM549
SCIs[neuronal rescue] = raga-1(ok386) + SCIs[neuronal raga-1] = strain WBM1170

## Sheet: C28A5.2 relative expression
C28A5.2 expression at L4 by qPCR relative to average N2
Wild type	raga-1(ok386)	neuronal rescue	SCIs[neuronal rescue]
0.959539	0.701861	0	0.689328
0.871566	0.45968	0	0.921831
1.19574	0.771228	0
Wild type = N2
raga-1(ok386) = strain WBM499
neuronal rescue = raga-1(ok386) + Ex[neuronal raga-1] = strain WBM549
SCIs[neuronal rescue] = raga-1(ok386) + SCIs[neuronal raga-1] = strain WBM1170

## Sheet: K10G4.5 relative expression
K10G4.5 expression at L4 by qPCR relative to average N2
Wild type	raga-1(ok386)	neuronal rescue	SCIs[neuronal rescue]
0.808522	0.549281	2.94367	0.704392
1.08965	0.874346	1.35854	0.79721
1.13507	1.88953	2.43801
Wild type = N2
raga-1(ok386) = strain WBM499
neuronal rescue = raga-1(ok386) + Ex[neuronal raga-1] = strain WBM549
SCIs[neuronal rescue] = raga-1(ok386) + SCIs[neuronal raga-1] = strain WBM1170

## Sheet: F35E12.5 relative expression
F35E12.5 (irg-5) expression at L4 by qPCR relative to average N2
Wild type	raga-1(ok386)	neuronal rescue	SCIs[neuronal rescue]
0.959539	6.74166	47.5299	8.16179
0.871566	4.06255	30.1099	8.46947
1.19574	9.45978	36.8781
Wild type = N2
raga-1(ok386) = strain WBM499
neuronal rescue = raga-1(ok386) + Ex[neuronal raga-1] = strain WBM549
SCIs[neuronal rescue] = raga-1(ok386) + SCIs[neuronal raga-1] = strain WBM1170

## Sheet: ins-6 relative expression at L4
ins-6 expression at L4 by qPCR relative to average N2
Wild type	raga-1(ok386)	neuronal rescue	SCIs[neuronal rescue]
1.06416	0.770172	1.57145	2.12603
0.987611	0.591584	1.45775	2.39794
0.951498	0.980584	1.69076
Wild type = N2
raga-1(ok386) = strain WBM499
neuronal rescue = raga-1(ok386) + Ex[neuronal raga-1] = strain WBM549
SCIs[neuronal rescue] = raga-1(ok386) + SCIs[neuronal raga-1] = strain WBM1170

## Sheet: daf-28 relative expression at L
daf-28 expression at L4 by qPCR relative to average N2
Wild type	raga-1(ok386)	neuronal rescue	SCIs[neuronal rescue]
1.06909	0.895239	1.35453	1.37322
0.969333	0.758186	1.26366	1.51332
0.964968	0.759208	1.31573
Wild type = N2
raga-1(ok386) = strain WBM499
neuronal rescue = raga-1(ok386) + Ex[neuronal raga-1] = strain WBM549
SCIs[neuronal rescue] = raga-1(ok386) + SCIs[neuronal raga-1] = strain WBM1170

## Sheet: raw data ugt-31_C28A5.2_ins-6
Block Type	96well
Chemistry	TAQMAN
Experiment File Name	D:\Documents and Settings\Administrator\Desktop\Anne\20190327_plate 1.eds
Experiment Run End Time	Not Started
Instrument Type	steponeplus
Passive Reference	ROX
Well	Sample Name	Target Name	Task	Reporter	Quencher	RQ	RQ Min	RQ Max	Cт	Cт Mean	Cт SD	ΔCт	ΔCт Mean	ΔCт SE	HK Control ΔCт Mean	HK Control ΔCт SE	ΔΔCт	Automatic Ct Threshold	Ct Threshold	Automatic Baseline	Baseline Start	Baseline End	Efficiency	Comments	BADROX	NOAMP	NOISE	EXPFAIL
A1	N2 13	Y45F10D.4	UNKNOWN	FAM	NFQ-MGB				22.0152	22.0152								TRUE	0.0123566	TRUE	3	20	1		N	N	N	N
A2	N2 18	Y45F10D.4	UNKNOWN	FAM	NFQ-MGB				21.3552	21.3552								TRUE	0.0123566	TRUE	3	20	1		N	N	N	N
A3	N2 23	Y45F10D.4	UNKNOWN	FAM	NFQ-MGB				21.3762	21.3762								TRUE	0.0123566	TRUE	3	20	1		N	N	N	N
A4	N2 13	ugt-31	UNKNOWN	FAM	NFQ-MGB	1			30.4655	30.4655			8.45028				0	TRUE	0.624715	TRUE	3	24	1		N	N	N	N
A5	N2 18	ugt-31	UNKNOWN	FAM	NFQ-MGB	0.706163			30.3074	30.3074			8.9522				0.501926	TRUE	0.624715	TRUE	3	23	1		N	N	N	N
A6	N2 23	ugt-31	UNKNOWN	FAM	NFQ-MGB	1.55599			29.1887	29.1887			7.81244				-0.637836	TRUE	0.624715	TRUE	3	22	1		N	N	N	N
A7	N2 13	C28A5.2	UNKNOWN	FAM	NFQ-MGB	1			23.9406	23.9406			1.92546				0	TRUE	0.0202467	TRUE	3	22	1		N	N	N	N
A8	N2 18	C28A5.2	UNKNOWN	FAM	NFQ-MGB	0.908318			23.4194	23.4194			2.06419				0.138731	TRUE	0.0202467	TRUE	3	21	1		N	N	N	N
A9	N2 23	C28A5.2	UNKNOWN	FAM	NFQ-MGB	1.24616			22.9842	22.9842			1.60797				-0.317492	TRUE	0.0202467	TRUE	3	21	1		N	N	N	N
A10	N2 13	ins-6	UNKNOWN	FAM	NFQ-MGB	1			26.4313	26.4313			4.41612				0	TRUE	0.0484845	TRUE	3	23	1		N	N	N	N
A11	N2 18	ins-6	UNKNOWN	FAM	NFQ-MGB	0.928067			25.879	25.879			4.52382				0.107698	TRUE	0.0484845	TRUE	3	23	1		N	N	N	N
A12	N2 23	ins-6	UNKNOWN	FAM	NFQ-MGB	0.894132			25.9538	25.9538			4.57756				0.16144	TRUE	0.0484845	TRUE	3	23	1		N	N	N	N
B1	499 14	Y45F10D.4	UNKNOWN	FAM	NFQ-MGB				21.4909	21.4909								TRUE	0.0123566	TRUE	3	20	1		N	N	N	N
B2	499 19	Y45F10D.4	UNKNOWN	FAM	NFQ-MGB				20.6206	20.6206								TRUE	0.0123566	TRUE	3	18	1		N	N	N	N
B3	499 24	Y45F10D.4	UNKNOWN	FAM	NFQ-MGB				22.2152	22.2152								TRUE	0.0123566	TRUE	3	21	1		N	N	N	N
B4	499 14	ugt-31	UNKNOWN	FAM	NFQ-MGB	2.56786			28.5806	28.5806			7.08971				-1.36057	TRUE	0.624715	TRUE	3	21	1		N	N	N	N
B5	499 19	ugt-31	UNKNOWN	FAM	NFQ-MGB	1.50047			28.4854	28.4854			7.86486				-0.585411	TRUE	0.624715	TRUE	3	20	1		N	N	N	N
B6	499 24	ugt-31	UNKNOWN	FAM	NFQ-MGB	3.01686			29.0724	29.0724			6.85723				-1.59305	TRUE	0.624715	TRUE	3	22	1		N	N	N	N
B7	499 14	C28A5.2	UNKNOWN	FAM	NFQ-MGB	0.731456			23.8675	23.8675			2.37662				0.451157	TRUE	0.0202467	TRUE	3	22	1		N	N	N	N
B8	499 19	C28A5.2	UNKNOWN	FAM	NFQ-MGB	0.479063			23.6077	23.6077			2.98717				1.06171	TRUE	0.0202467	TRUE	3	21	1		N	N	N	N
B9	499 24	C28A5.2	UNKNOWN	FAM	NFQ-MGB	0.803749			24.4559	24.4559			2.24064				0.315184	TRUE	0.0202467	TRUE	3	22	1		N	N	N	N
B10	499 14	ins-6	UNKNOWN	FAM	NFQ-MGB	0.723739			26.3735	26.3735			4.88258				0.466459	TRUE	0.0484845	TRUE	3	23	1		N	N	N	N
B11	499 19	ins-6	UNKNOWN	FAM	NFQ-MGB	0.555918			25.8837	25.8837			5.26318				0.847057	TRUE	0.0484845	TRUE	3	23	1		N	N	N	N
B12	499 24	ins-6	UNKNOWN	FAM	NFQ-MGB	0.921464			26.7493	26.7493			4.53412				0.118	TRUE	0.0484845	TRUE	3	23	1		N	N	N	N
C1	549 16	Y45F10D.4	UNKNOWN	FAM	NFQ-MGB				21.4326	21.4326								TRUE	0.0123566	TRUE	3	20	1		N	N	N	N
C2	549 21	Y45F10D.4	UNKNOWN	FAM	NFQ-MGB				21.4186	21.4186								TRUE	0.0123566	TRUE	3	20	1		N	N	N	N
C3	549 26	Y45F10D.4	UNKNOWN	FAM	NFQ-MGB				22.6339	22.6339								TRUE	0.0123566	TRUE	3	21	1		N	N	N	N
C4	549 16	ugt-31	UNKNOWN	FAM	NFQ-MGB	3.62908			28.0233	28.0233			6.59067				-1.8596	TRUE	0.624715	TRUE	3	21	1		N	N	N	N
C5	549 21	ugt-31	UNKNOWN	FAM	NFQ-MGB	3.42007			28.0949	28.0949			6.67625				-1.77403	TRUE	0.624715	TRUE	3	21	1		N	N	N	N
C6	549 26	ugt-31	UNKNOWN	FAM	NFQ-MGB	3.28751			29.3672	29.3672			6.73328				-1.71699	TRUE	0.624715	TRUE	3	22	1		N	N	N	N
C7	549 16	C28A5.2	UNKNOWN	FAM	NFQ-MGB				Undetermined									TRUE	0.0202467	TRUE	3	39	1		N	N	N	Y
C8	549 21	C28A5.2	UNKNOWN	FAM	NFQ-MGB				Undetermined									TRUE	0.0202467	TRUE	3	39	1		N	N	N	Y
C9	549 26	C28A5.2	UNKNOWN	FAM	NFQ-MGB				Undetermined									TRUE	0.0202467	TRUE	3	39	1		N	Y	N	Y
C10	549 16	ins-6	UNKNOWN	FAM	NFQ-MGB	1.4767			25.2864	25.2864			3.85374				-0.56238	TRUE	0.0484845	TRUE	3	22	1		N	N	N	N
C11	549 21	ins-6	UNKNOWN	FAM	NFQ-MGB	1.36987			25.3807	25.3807			3.96209				-0.454035	TRUE	0.0484845	TRUE	3	22	1		N	N	N	N
C12	549 26	ins-6	UNKNOWN	FAM	NFQ-MGB	1.58882			26.382	26.382			3.74816				-0.667957	TRUE	0.0484845	TRUE	3	23	1		N	N	N	N
D1	1170 17	Y45F10D.4	UNKNOWN	FAM	NFQ-MGB				21.9151	21.9151								TRUE	0.0123566	TRUE	3	21	1		N	N	N	N
D2	1170 22	Y45F10D.4	UNKNOWN	FAM	NFQ-MGB				21.6374	21.6374								TRUE	0.0123566	TRUE	3	20	1		N	N	N	N
D3	1170 12	Y45F10D.4	UNKNOWN	FAM	NFQ-MGB				Undetermined									TRUE	0.0123566	TRUE	1	2	1		Y	N	Y	N
D4	1170 17	ugt-31	UNKNOWN	FAM	NFQ-MGB	2.93369			28.8127	28.8127			6.89756				-1.55272	TRUE	0.624715	TRUE	3	22	1		N	N	N	N
D5	1170 22	ugt-31	UNKNOWN	FAM	NFQ-MGB	4.35763			27.9641	27.9641			6.32673				-2.12354	TRUE	0.624715	TRUE	3	21	1		N	N	N	N
D6	1170 12	ugt-31	UNKNOWN	FAM	NFQ-MGB				12.664	12.664								TRUE	0.624715	TRUE	1	2	1		N	N	N	N
D7	1170 17	C28A5.2	UNKNOWN	FAM	NFQ-MGB	0.718395			24.3177	24.3177			2.40261				0.47715	TRUE	0.0202467	TRUE	3	22	1		N	N	N	N
D8	1170 22	C28A5.2	UNKNOWN	FAM	NFQ-MGB	0.960702			23.6207	23.6207			1.9833				0.0578384	TRUE	0.0202467	TRUE	3	21	1		N	N	N	N
D9	1170 12	C28A5.2	UNKNOWN	FAM	NFQ-MGB				Undetermined									TRUE	0.0202467	TRUE	1	2	1		N	N	Y	N
D10	1170 17	ins-6	UNKNOWN	FAM	NFQ-MGB	1.99785			25.3328	25.3328			3.41767				-0.998451	TRUE	0.0484845	TRUE	3	22	1		N	N	N	N
D11	1170 22	ins-6	UNKNOWN	FAM	NFQ-MGB	2.25337			24.8814	24.8814			3.24404				-1.17208	TRUE	0.0484845	TRUE	3	22	1		N	N	N	N
D12	1170 12	ins-6	UNKNOWN	FAM	NFQ-MGB				Undetermined									TRUE	0.0484845	TRUE	1	2	1		Y	N	N	N
E1	13 -	Y45F10D.4	UNKNOWN	FAM	NFQ-MGB				Undetermined									TRUE	0.0123566	TRUE	3	39	1		N	N	N	Y
E2	18 -	Y45F10D.4	UNKNOWN	FAM	NFQ-MGB				Undetermined									TRUE	0.0123566	TRUE	3	39	1		N	Y	N	Y
E3	23 -	Y45F10D.4	UNKNOWN	FAM	NFQ-MGB				38.9065	38.9065								TRUE	0.0123566	TRUE	3	35	1		N	N	N	N
E4	13 -	ugt-31	UNKNOWN	FAM	NFQ-MGB				Undetermined									TRUE	0.624715	TRUE	3	39	1		N	N	N	Y
E5	18 -	ugt-31	UNKNOWN	FAM	NFQ-MGB				Undetermined									TRUE	0.624715	TRUE	3	39	1		N	N	N	Y
E6	23 -	ugt-31	UNKNOWN	FAM	NFQ-MGB				Undetermined									TRUE	0.624715	TRUE	3	39	1		N	N	N	Y
E7	13 -	C28A5.2	UNKNOWN	FAM	NFQ-MGB				Undetermined									TRUE	0.0202467	TRUE	3	39	1		N	Y	N	Y
E8	18 -	C28A5.2	UNKNOWN	FAM	NFQ-MGB				38.409	38.409								TRUE	0.0202467	TRUE	3	35	1		N	N	N	N
E9	23 -	C28A5.2	UNKNOWN	FAM	NFQ-MGB	3.90846			38.8654	38.8654			-0.0411415				-1.9666	TRUE	0.0202467	TRUE	3	35	1		N	N	N	N
E10	13 -	ins-6	UNKNOWN	FAM	NFQ-MGB				Undetermined									TRUE	0.0484845	TRUE	3	39	1		N	N	N	Y
E11	18 -	ins-6	UNKNOWN	FAM	NFQ-MGB				Undetermined									TRUE	0.0484845	TRUE	3	39	1		N	N	N	Y
E12	23 -	ins-6	UNKNOWN	FAM	NFQ-MGB				Undetermined									TRUE	0.0484845	TRUE	3	39	1		N	N	N	Y
F1	14 -	Y45F10D.4	UNKNOWN	FAM	NFQ-MGB				Undetermined									TRUE	0.0123566	TRUE	3	39	1		N	Y	N	Y
F2	19 -	Y45F10D.4	UNKNOWN	FAM	NFQ-MGB				Undetermined									TRUE	0.0123566	TRUE	3	39	1		N	Y	N	Y
F3	24 -	Y45F10D.4	UNKNOWN	FAM	NFQ-MGB				37.1359	37.1359								TRUE	0.0123566	TRUE	3	35	1		N	N	N	N
F4	14 -	ugt-31	UNKNOWN	FAM	NFQ-MGB				Undetermined									TRUE	0.624715	TRUE	3	39	1		N	N	N	Y
F5	19 -	ugt-31	UNKNOWN	FAM	NFQ-MGB				Undetermined									TRUE	0.624715	TRUE	3	39	1		N	Y	N	Y
F6	24 -	ugt-31	UNKNOWN	FAM	NFQ-MGB				Undetermined									TRUE	0.624715	TRUE	3	39	1		N	Y	N	Y
F7	14 -	C28A5.2	UNKNOWN	FAM	NFQ-MGB				38.4876	38.4876								TRUE	0.0202467	TRUE	3	35	1		N	N	N	N
F8	19 -	C28A5.2	UNKNOWN	FAM	NFQ-MGB				Undetermined									TRUE	0.0202467	TRUE	3	39	1		N	Y	N	Y
F9	24 -	C28A5.2	UNKNOWN	FAM	NFQ-MGB	5.4057			36.6268	36.6268			-0.509022				-2.43448	TRUE	0.0202467	TRUE	3	34	1		N	N	N	N
F10	14 -	ins-6	UNKNOWN	FAM	NFQ-MGB				Undetermined									TRUE	0.0484845	TRUE	3	39	1		N	N	N	Y
F11	19 -	ins-6	UNKNOWN	FAM	NFQ-MGB				Undetermined									TRUE	0.0484845	TRUE	3	38	1		N	N	N	Y
F12	24 -	ins-6	UNKNOWN	FAM	NFQ-MGB				Undetermined									TRUE	0.0484845	TRUE	3	39	1		N	N	N	Y
G1	16 -	Y45F10D.4	UNKNOWN	FAM	NFQ-MGB				Undetermined									TRUE	0.0123566	TRUE	3	39	1		N	Y	N	Y
G2	21 -	Y45F10D.4	UNKNOWN	FAM	NFQ-MGB				37.3243	37.3243								TRUE	0.0123566	TRUE	3	35	1		N	N	N	N
G3	26 -	Y45F10D.4	UNKNOWN	FAM	NFQ-MGB				Undetermined									TRUE	0.0123566	TRUE	3	39	1		N	Y	N	Y
G4	16 -	ugt-31	UNKNOWN	FAM	NFQ-MGB				Undetermined									TRUE	0.624715	TRUE	3	39	1		N	N	N	Y
G5	21 -	ugt-31	UNKNOWN	FAM	NFQ-MGB				Undetermined									TRUE	0.624715	TRUE	3	39	1		N	Y	N	Y
G6	26 -	ugt-31	UNKNOWN	FAM	NFQ-MGB				Undetermined									TRUE	0.624715	TRUE	3	39	1		N	N	N	Y
G7	16 -	C28A5.2	UNKNOWN	FAM	NFQ-MGB				Undetermined									TRUE	0.0202467	TRUE	3	39	1		N	Y	N	Y
G8	21 -	C28A5.2	UNKNOWN	FAM	NFQ-MGB				Undetermined									TRUE	0.0202467	TRUE	3	39	1		N	Y	N	Y
G9	26 -	C28A5.2	UNKNOWN	FAM	NFQ-MGB				Undetermined									TRUE	0.0202467	TRUE	3	39	1		N	N	N	Y
G10	16 -	ins-6	UNKNOWN	FAM	NFQ-MGB				Undetermined									TRUE	0.0484845	TRUE	3	39	1		N	N	N	Y
G11	21 -	ins-6	UNKNOWN	FAM	NFQ-MGB				Undetermined									TRUE	0.0484845	TRUE	3	36	1		N	N	N	N
G12	26 -	ins-6	UNKNOWN	FAM	NFQ-MGB				Undetermined									TRUE	0.0484845	TRUE	3	39	1		N	N	N	Y
H1	17 -	Y45F10D.4	UNKNOWN	FAM	NFQ-MGB				Undetermined									TRUE	0.0123566	TRUE	3	36	1		N	N	N	Y
H2	22 -	Y45F10D.4	UNKNOWN	FAM	NFQ-MGB				36.8061	36.8061								TRUE	0.0123566	TRUE	3	35	1		N	N	N	N
H3	12 -	Y45F10D.4	UNKNOWN	FAM	NFQ-MGB				38.1455	38.1455								TRUE	0.0123566	TRUE	3	35	1		N	N	N	N
H4	17 -	ugt-31	UNKNOWN	FAM	NFQ-MGB				Undetermined									TRUE	0.624715	TRUE	3	24	1		N	N	N	Y
H5	22 -	ugt-31	UNKNOWN	FAM	NFQ-MGB				Undetermined									TRUE	0.624715	TRUE	3	39	1		N	N	N	Y
H6	12 -	ugt-31	UNKNOWN	FAM	NFQ-MGB				Undetermined									TRUE	0.624715	TRUE	3	39	1		N	N	N	Y
H7	17 -	C28A5.2	UNKNOWN	FAM	NFQ-MGB				38	38								TRUE	0.0202467	TRUE	3	36	1		N	N	N	N
H8	22 -	C28A5.2	UNKNOWN	FAM	NFQ-MGB	3.54303			36.9066	36.9066			0.100475				-1.82498	TRUE	0.0202467	TRUE	3	35	1		N	N	N	N
H9	12 -	C28A5.2	UNKNOWN	FAM	NFQ-MGB				Undetermined									TRUE	0.0202467	TRUE	3	39	1		N	Y	N	Y
H10	17 -	ins-6	UNKNOWN	FAM	NFQ-MGB				Undetermined									TRUE	0.0484845	TRUE	3	39	1		N	N	N	Y
H11	22 -	ins-6	UNKNOWN	FAM	NFQ-MGB				Undetermined									TRUE	0.0484845	TRUE	3	24	1		N	N	N	Y
H12	12 -	ins-6	UNKNOWN	FAM	NFQ-MGB				Undetermined									TRUE	0.0484845	TRUE	3	39	1		N	Y	N	Y
Analysis Type	Singleplex
Endogenous Control	Y45F10D.4
RQ Min/Max Confidence Level	95.0
Reference Sample	N2 13

## Sheet: raw data_K10G4.5_F35E12_daf-28
Block Type	96well
Chemistry	TAQMAN
Experiment File Name	D:\Documents and Settings\Administrator\Desktop\Anne\20190327 plate 2.eds
Experiment Run End Time	2019-03-27 22:21:56 PM EDT
Instrument Type	steponeplus
Passive Reference	ROX
Well	Sample Name	Target Name	Task	Reporter	Quencher	RQ	RQ Min	RQ Max	Cт	Cт Mean	Cт SD	ΔCт	ΔCт Mean	ΔCт SE	HK Control ΔCт Mean	HK Control ΔCт SE	ΔΔCт	Automatic Ct Threshold	Ct Threshold	Automatic Baseline	Baseline Start	Baseline End	Efficiency	Comments	BADROX	NOAMP	NOISE	EXPFAIL
A1	N2 13	Y45F10D.4	UNKNOWN	FAM	NFQ-MGB				22.1733	22.1733								TRUE	0.0149027	TRUE	3	21	1		N	N	N	N
A2	N2 18	Y45F10D.4	UNKNOWN	FAM	NFQ-MGB				21.4488	21.4488								TRUE	0.0149027	TRUE	3	20	1		N	N	N	N
A3	N2 23	Y45F10D.4	UNKNOWN	FAM	NFQ-MGB				21.5369	21.5369								TRUE	0.0149027	TRUE	3	20	1		N	N	N	N
A4	N2 13	K10G4.5	UNKNOWN	FAM	NFQ-MGB	1			33.8378	33.8378			11.6644				0	TRUE	0.0171295	TRUE	3	32	1		N	N	N	N
A5	N2 18	K10G4.5	UNKNOWN	FAM	NFQ-MGB	1.3477			32.6827	32.6827			11.2339				-0.4305	TRUE	0.0171295	TRUE	3	31	1		N	N	N	N
A6	N2 23	K10G4.5	UNKNOWN	FAM	NFQ-MGB	1.40388			32.7119	32.7119			11.175				-0.489424	TRUE	0.0171295	TRUE	3	31	1		N	N	N	N
A7	N2 13	F35E12.5	UNKNOWN	FAM	NFQ-MGB	1			30.9327	30.9327			8.75939				0	TRUE	0.707169	TRUE	3	24	1		N	N	N	N
A8	N2 18	F35E12.5	UNKNOWN	FAM	NFQ-MGB	0.666528			30.7935	30.7935			9.34465				0.585262	TRUE	0.707169	TRUE	3	24	1		N	N	N	N
A9	N2 23	F35E12.5	UNKNOWN	FAM	NFQ-MGB	0.638523			30.9435	30.9435			9.40658				0.64719	TRUE	0.707169	TRUE	3	24	1		N	N	N	N
A10	N2 13	daf-28	UNKNOWN	FAM	NFQ-MGB	1			28.4549	28.4549			6.28155				0	TRUE	0.553002	TRUE	3	22	1		N	N	N	N
A11	N2 18	daf-28	UNKNOWN	FAM	NFQ-MGB	0.906691			27.8717	27.8717			6.42287				0.141317	TRUE	0.553002	TRUE	3	21	1		N	N	N	N
A12	N2 23	daf-28	UNKNOWN	FAM	NFQ-MGB	0.902608			27.9662	27.9662			6.42938				0.147829	TRUE	0.553002	TRUE	3	21	1		N	N	N	N
B1	499 14	Y45F10D.4	UNKNOWN	FAM	NFQ-MGB				21.7082	21.7082								TRUE	0.0149027	TRUE	3	20	1		N	N	N	N
B2	499 19	Y45F10D.4	UNKNOWN	FAM	NFQ-MGB				21.5106	21.5106								TRUE	0.0149027	TRUE	3	20	1		N	N	N	N
B3	499 24	Y45F10D.4	UNKNOWN	FAM	NFQ-MGB				22.699	22.699								TRUE	0.0149027	TRUE	3	21	1		N	N	N	N
B4	499 14	K10G4.5	UNKNOWN	FAM	NFQ-MGB	0.679365			33.9304	33.9304			12.2222				0.557741	TRUE	0.0171295	TRUE	3	32	1		N	N	N	N
B5	499 19	K10G4.5	UNKNOWN	FAM	NFQ-MGB	1.08141			33.0622	33.0622			11.5515				-0.112917	TRUE	0.0171295	TRUE	3	31	1		N	N	N	N
B6	499 24	K10G4.5	UNKNOWN	FAM	NFQ-MGB	2.33701			33.1388	33.1388			10.4398				-1.22467	TRUE	0.0171295	TRUE	3	31	1		N	N	N	N
B7	499 14	F35E12.5	UNKNOWN	FAM	NFQ-MGB	5.07106			28.1253	28.1253			6.4171				-2.34229	TRUE	0.707169	TRUE	3	21	1		N	N	N	N
B8	499 19	F35E12.5	UNKNOWN	FAM	NFQ-MGB	3.05584			28.6585	28.6585			7.14782				-1.61157	TRUE	0.707169	TRUE	3	21	1		N	N	N	N
B9	499 24	F35E12.5	UNKNOWN	FAM	NFQ-MGB	7.11562			28.6274	28.6274			5.9284				-2.83099	TRUE	0.707169	TRUE	3	22	1		N	N	N	N
B10	499 14	daf-28	UNKNOWN	FAM	NFQ-MGB	0.837385			28.2458	28.2458			6.53759				0.256037	TRUE	0.553002	TRUE	3	21	1		N	N	N	N
B11	499 19	daf-28	UNKNOWN	FAM	NFQ-MGB	0.709189			28.2879	28.2879			6.77731				0.495758	TRUE	0.553002	TRUE	3	21	1		N	N	N	N
B12	499 24	daf-28	UNKNOWN	FAM	NFQ-MGB	0.710145			29.4744	29.4744			6.77536				0.493814	TRUE	0.553002	TRUE	3	23	1		N	N	N	N
C1	549 16	Y45F10D.4	UNKNOWN	FAM	NFQ-MGB				21.7037	21.7037								TRUE	0.0149027	TRUE	3	20	1		N	N	N	N
C2	549 21	Y45F10D.4	UNKNOWN	FAM	NFQ-MGB				21.5758	21.5758								TRUE	0.0149027	TRUE	3	20	1		N	N	N	N
C3	549 26	Y45F10D.4	UNKNOWN	FAM	NFQ-MGB				22.8694	22.8694								TRUE	0.0149027	TRUE	3	21	1		N	N	N	N
C4	549 16	K10G4.5	UNKNOWN	FAM	NFQ-MGB	3.6408			31.5039	31.5039			9.80019				-1.86426	TRUE	0.0171295	TRUE	3	30	1		N	N	N	N
C5	549 21	K10G4.5	UNKNOWN	FAM	NFQ-MGB	1.68027			32.4915	32.4915			10.9158				-0.748693	TRUE	0.0171295	TRUE	3	31	1		N	N	N	N
C6	549 26	K10G4.5	UNKNOWN	FAM	NFQ-MGB	3.01539			32.9415	32.9415			10.0721				-1.59234	TRUE	0.0171295	TRUE	3	31	1		N	N	N	N
C7	549 16	F35E12.5	UNKNOWN	FAM	NFQ-MGB	35.7518			25.3032	25.3032			3.59945				-5.15994	TRUE	0.707169	TRUE	3	18	1		N	N	N	N
C8	549 21	F35E12.5	UNKNOWN	FAM	NFQ-MGB	22.6485			25.8338	25.8338			4.25804				-4.50135	TRUE	0.707169	TRUE	3	19	1		N	N	N	N
C9	549 26	F35E12.5	UNKNOWN	FAM	NFQ-MGB	27.7396			26.8349	26.8349			3.96552				-4.79387	TRUE	0.707169	TRUE	3	20	1		N	N	N	N
C10	549 16	daf-28	UNKNOWN	FAM	NFQ-MGB	1.267			27.6439	27.6439			5.94013				-0.341415	TRUE	0.553002	TRUE	3	21	1		N	N	N	N
C11	549 21	daf-28	UNKNOWN	FAM	NFQ-MGB	1.182			27.6161	27.6161			6.04032				-0.24123	TRUE	0.553002	TRUE	3	21	1		N	N	N	N
C12	549 26	daf-28	UNKNOWN	FAM	NFQ-MGB	1.2307			28.8514	28.8514			5.98207				-0.299482	TRUE	0.553002	TRUE	3	22	1		N	N	N	N
D1	1170 17	Y45F10D.4	UNKNOWN	FAM	NFQ-MGB				21.9701	21.9701								TRUE	0.0149027	TRUE	3	20	1		N	N	N	N
D2	1170 22	Y45F10D.4	UNKNOWN	FAM	NFQ-MGB				21.5213	21.5213								TRUE	0.0149027	TRUE	3	20	1		N	N	N	N
D3	1170 12	Y45F10D.4	UNKNOWN	FAM	NFQ-MGB				Undetermined									TRUE	0.0149027	TRUE	1	2	1		Y	N	Y	N
D4	1170 17	K10G4.5	UNKNOWN	FAM	NFQ-MGB	0.87121			33.8335	33.8335			11.8634				0.198908	TRUE	0.0171295	TRUE	3	32	1		N	N	N	N
D5	1170 22	K10G4.5	UNKNOWN	FAM	NFQ-MGB	0.986009			33.206	33.206			11.6848				0.0203266	TRUE	0.0171295	TRUE	3	31	1		N	N	N	N
D6	1170 12	K10G4.5	UNKNOWN	FAM	NFQ-MGB				Undetermined									TRUE	0.0171295	TRUE	1	2	1		Y	N	N	N
D7	1170 17	F35E12.5	UNKNOWN	FAM	NFQ-MGB	6.13928			28.1114	28.1114			6.14132				-2.61807	TRUE	0.707169	TRUE	3	22	1		N	N	N	N
D8	1170 22	F35E12.5	UNKNOWN	FAM	NFQ-MGB	6.37071			27.6092	27.6092			6.08794				-2.67145	TRUE	0.707169	TRUE	3	21	1		N	N	N	N
D9	1170 12	F35E12.5	UNKNOWN	FAM	NFQ-MGB				9.36433	9.36433								TRUE	0.707169	TRUE	1	2	1		Y	N	Y	N
D10	1170 17	daf-28	UNKNOWN	FAM	NFQ-MGB	1.28448			27.8905	27.8905			5.92036				-0.361185	TRUE	0.553002	TRUE	3	21	1		N	N	N	N
D11	1170 22	daf-28	UNKNOWN	FAM	NFQ-MGB	1.41552			27.3015	27.3015			5.78021				-0.501337	TRUE	0.553002	TRUE	3	21	1		N	N	N	N
D12	1170 12	daf-28	UNKNOWN	FAM	NFQ-MGB				9.02269	9.02269								TRUE	0.553002	TRUE	1	2	1		N	N	N	N
E1	13 -	Y45F10D.4	UNKNOWN	FAM	NFQ-MGB				Undetermined									TRUE	0.0149027	TRUE	3	39	1		N	Y	N	Y
E2	18 -	Y45F10D.4	UNKNOWN	FAM	NFQ-MGB				Undetermined									TRUE	0.0149027	TRUE	3	39	1		N	Y	N	Y
E3	23 -	Y45F10D.4	UNKNOWN	FAM	NFQ-MGB				Undetermined									TRUE	0.0149027	TRUE	3	39	1		N	Y	N	Y
E4	13 -	K10G4.5	UNKNOWN	FAM	NFQ-MGB				Undetermined									TRUE	0.0171295	TRUE	3	39	1		N	N	N	Y
E5	18 -	K10G4.5	UNKNOWN	FAM	NFQ-MGB				Undetermined									TRUE	0.0171295	TRUE	3	39	1		N	N	N	Y
E6	23 -	K10G4.5	UNKNOWN	FAM	NFQ-MGB				Undetermined									TRUE	0.0171295	TRUE	3	39	1		N	Y	N	Y
E7	13 -	F35E12.5	UNKNOWN	FAM	NFQ-MGB				Undetermined									TRUE	0.707169	TRUE	3	39	1		N	Y	N	Y
E8	18 -	F35E12.5	UNKNOWN	FAM	NFQ-MGB				Undetermined									TRUE	0.707169	TRUE	3	39	1		N	Y	N	Y
E9	23 -	F35E12.5	UNKNOWN	FAM	NFQ-MGB				Undetermined									TRUE	0.707169	TRUE	3	39	1		N	Y	N	Y
E10	13 -	daf-28	UNKNOWN	FAM	NFQ-MGB				Undetermined									TRUE	0.553002	TRUE	3	39	1		N	Y	N	Y
E11	18 -	daf-28	UNKNOWN	FAM	NFQ-MGB				Undetermined									TRUE	0.553002	TRUE	3	39	1		N	Y	N	Y
E12	23 -	daf-28	UNKNOWN	FAM	NFQ-MGB				Undetermined									TRUE	0.553002	TRUE	3	39	1		N	Y	N	Y
F1	14 -	Y45F10D.4	UNKNOWN	FAM	NFQ-MGB				36.8328	36.8328								TRUE	0.0149027	TRUE	3	35	1		N	N	N	N
F2	19 -	Y45F10D.4	UNKNOWN	FAM	NFQ-MGB				Undetermined									TRUE	0.0149027	TRUE	3	39	1		N	Y	N	Y
F3	24 -	Y45F10D.4	UNKNOWN	FAM	NFQ-MGB				36.6738	36.6738								TRUE	0.0149027	TRUE	3	35	1		N	N	N	N
F4	14 -	K10G4.5	UNKNOWN	FAM	NFQ-MGB				Undetermined									TRUE	0.0171295	TRUE	3	39	1		N	Y	N	Y
F5	19 -	K10G4.5	UNKNOWN	FAM	NFQ-MGB				37.0917	37.0917								TRUE	0.0171295	TRUE	3	35	1		N	N	N	N
F6	24 -	K10G4.5	UNKNOWN	FAM	NFQ-MGB				Undetermined									TRUE	0.0171295	TRUE	3	39	1		N	Y	N	Y
F7	14 -	F35E12.5	UNKNOWN	FAM	NFQ-MGB				Undetermined									TRUE	0.707169	TRUE	3	39	1		N	Y	N	Y
F8	19 -	F35E12.5	UNKNOWN	FAM	NFQ-MGB				Undetermined									TRUE	0.707169	TRUE	3	39	1		N	Y	N	Y
F9	24 -	F35E12.5	UNKNOWN	FAM	NFQ-MGB				Undetermined									TRUE	0.707169	TRUE	3	39	1		N	Y	N	Y
F10	14 -	daf-28	UNKNOWN	FAM	NFQ-MGB				Undetermined									TRUE	0.553002	TRUE	3	39	1		N	Y	N	Y
F11	19 -	daf-28	UNKNOWN	FAM	NFQ-MGB				Undetermined									TRUE	0.553002	TRUE	3	39	1		N	Y	N	Y
F12	24 -	daf-28	UNKNOWN	FAM	NFQ-MGB				Undetermined									TRUE	0.553002	TRUE	3	39	1		N	Y	N	Y
G1	16 -	Y45F10D.4	UNKNOWN	FAM	NFQ-MGB				37.9436	37.9436								TRUE	0.0149027	TRUE	3	35	1		N	N	N	N
G2	21 -	Y45F10D.4	UNKNOWN	FAM	NFQ-MGB				37.1087	37.1087								TRUE	0.0149027	TRUE	3	35	1		N	N	N	N
G3	26 -	Y45F10D.4	UNKNOWN	FAM	NFQ-MGB				Undetermined									TRUE	0.0149027	TRUE	3	39	1		N	Y	N	Y
G4	16 -	K10G4.5	UNKNOWN	FAM	NFQ-MGB	11158.3			36.1622	36.1622			-1.78138				-13.4458	TRUE	0.0171295	TRUE	3	35	1		N	N	N	N
G5	21 -	K10G4.5	UNKNOWN	FAM	NFQ-MGB	4127.49			36.7621	36.7621			-0.346603				-12.011	TRUE	0.0171295	TRUE	3	35	1		N	N	N	N
G6	26 -	K10G4.5	UNKNOWN	FAM	NFQ-MGB				Undetermined									TRUE	0.0171295	TRUE	3	39	1		N	Y	N	Y
G7	16 -	F35E12.5	UNKNOWN	FAM	NFQ-MGB				Undetermined									TRUE	0.707169	TRUE	3	39	1		N	Y	N	Y
G8	21 -	F35E12.5	UNKNOWN	FAM	NFQ-MGB				Undetermined									TRUE	0.707169	TRUE	3	39	1		N	Y	N	Y
G9	26 -	F35E12.5	UNKNOWN	FAM	NFQ-MGB				Undetermined									TRUE	0.707169	TRUE	3	39	1		N	Y	N	Y
G10	16 -	daf-28	UNKNOWN	FAM	NFQ-MGB				Undetermined									TRUE	0.553002	TRUE	3	39	1		N	Y	N	Y
G11	21 -	daf-28	UNKNOWN	FAM	NFQ-MGB				Undetermined									TRUE	0.553002	TRUE	3	39	1		N	Y	N	Y
G12	26 -	daf-28	UNKNOWN	FAM	NFQ-MGB				Undetermined									TRUE	0.553002	TRUE	3	39	1		N	Y	N	Y
H1	17 -	Y45F10D.4	UNKNOWN	FAM	NFQ-MGB				Undetermined									TRUE	0.0149027	TRUE	3	39	1		N	Y	N	Y
H2	22 -	Y45F10D.4	UNKNOWN	FAM	NFQ-MGB				Undetermined									TRUE	0.0149027	TRUE	3	39	1		N	Y	N	Y
H3	12 -	Y45F10D.4	UNKNOWN	FAM	NFQ-MGB				Undetermined									TRUE	0.0149027	TRUE	3	39	1		N	Y	N	Y
H4	17 -	K10G4.5	UNKNOWN	FAM	NFQ-MGB				Undetermined									TRUE	0.0171295	TRUE	3	39	1		N	Y	N	Y
H5	22 -	K10G4.5	UNKNOWN	FAM	NFQ-MGB				Undetermined									TRUE	0.0171295	TRUE	3	21	1		N	N	N	N
H6	12 -	K10G4.5	UNKNOWN	FAM	NFQ-MGB				Undetermined									TRUE	0.0171295	TRUE	3	39	1		N	Y	N	Y
H7	17 -	F35E12.5	UNKNOWN	FAM	NFQ-MGB				Undetermined									TRUE	0.707169	TRUE	3	39	1		N	Y	N	Y
H8	22 -	F35E12.5	UNKNOWN	FAM	NFQ-MGB				Undetermined									TRUE	0.707169	TRUE	3	39	1		N	Y	N	Y
H9	12 -	F35E12.5	UNKNOWN	FAM	NFQ-MGB				Undetermined									TRUE	0.707169	TRUE	3	39	1		N	Y	N	Y
H10	17 -	daf-28	UNKNOWN	FAM	NFQ-MGB				Undetermined									TRUE	0.553002	TRUE	3	39	1		N	Y	N	Y
H11	22 -	daf-28	UNKNOWN	FAM	NFQ-MGB				Undetermined									TRUE	0.553002	TRUE	3	39	1		N	Y	N	Y
H12	12 -	daf-28	UNKNOWN	FAM	NFQ-MGB				Undetermined									TRUE	0.553002	TRUE	3	39	1		N	Y	N	Y
Analysis Type	Singleplex
Endogenous Control	Y45F10D.4
RQ Min/Max Confidence Level	95.0
Reference Sample	N2 13
