# Supplementary material for: Neuronal TORC1 modulates longevity via AMPK and cell nonautonomous regulation of mitochondrial dynamics in C. elegans
Source: eLife journal article supplement (doi:10.7554/elife.49158), 2019-08-14
Supplement: supp [file elife-49158-supp-v1.zip › elife_poa_e49158_Figure_3_source_data_3.xlsx]

## Sheet: ins-6 expression in SCIs
ins-6 expression in Day 1 adults relative to N2 sample 1
N2	raga-1(ok386)	raga-1 + SCIs[somatic raga-1]	raga-1 + SCIs[neuronal raga-1]	raga-1 + Ex[neuronal raga-1]
1	1.04301	2.81937	2.15584	2.54584
0.859964	1.08626	1.95898	1.98035	1.69814
0.894337	0.725855	1.86578	2.87015
Wild type = N2
raga-1(ok386) = strain WBM499
raga-1 + SCIs[somatic raga-1] = strain WBM1169
raga-1 + SCIs[neuronal raga-1] = strain WBM1170
raga-1 + Ex[neuronal raga-1] = strain WBM549

## Sheet: Raw values
Block Type	96well
Chemistry	TAQMAN
Experiment File Name	D:\Documents and Settings\Administrator\Desktop\Anne\20190329_neuronal_raga_Day 1 raga-1 ins-6.eds
Experiment Run End Time	2019-03-29 19:58:42 PM EDT
Instrument Type	steponeplus
Passive Reference	ROX
Well	Sample Name	Target Name	Task	Reporter	Quencher	RQ	RQ Min	RQ Max	Cт	Cт Mean	Cт SD	ΔCт	ΔCт Mean	ΔCт SE	HK Control ΔCт Mean	HK Control ΔCт SE	ΔΔCт	Automatic Ct Threshold	Ct Threshold	Automatic Baseline	Baseline Start	Baseline End	Efficiency	Comments	BADROX	NOAMP	NOISE	NOSIGNAL	EXPFAIL	CTFAIL
A1	N2 27	Y45F10D.4	UNKNOWN	FAM	NFQ-MGB				26.2718	26.2718								TRUE	0.581275	TRUE	3	19	1		N	N	N	N	N	N
A2	499 28	Y45F10D.4	UNKNOWN	FAM	NFQ-MGB				26.2613	26.2613								TRUE	0.581275	TRUE	3	19	1		N	N	N	N	N	N
A3	1169 31	Y45F10D.4	UNKNOWN	FAM	NFQ-MGB				27.3723	27.3723								TRUE	0.581275	TRUE	3	20	1		N	N	N	N	N	N
A4	1170 32	Y45F10D.4	UNKNOWN	FAM	NFQ-MGB				26.8151	26.8151								TRUE	0.581275	TRUE	3	20	1		N	N	N	N	N	N
A5	N2 27	raga-1	UNKNOWN	FAM	NFQ-MGB	1			20.9384	20.9384			-5.33337				0	TRUE	0.0209127	TRUE	3	19	1		N	N	N	N	N	N
A6	499 28	raga-1	UNKNOWN	FAM	NFQ-MGB				Undetermined									TRUE	0.0209127	TRUE	3	39	1		N	N	N	N	Y	N
A7	1169 31	raga-1	UNKNOWN	FAM	NFQ-MGB	1.30169			21.6585	21.6585			-5.71375				-0.380381	TRUE	0.0209127	TRUE	3	20	1		N	N	N	N	N	N
A8	1170 32	raga-1	UNKNOWN	FAM	NFQ-MGB	0.029113			26.5839	26.5839			-0.231176				5.10219	TRUE	0.0209127	TRUE	3	24	1		N	N	N	N	N	N
A9	N2 27	ins-6	UNKNOWN	FAM	NFQ-MGB	1			24.8672	24.8672			-1.40457				0	TRUE	0.0172489	TRUE	3	23	1		N	N	N	N	N	N
A10	499 28	ins-6	UNKNOWN	FAM	NFQ-MGB	1.04301			24.796	24.796			-1.46532				-0.0607491	TRUE	0.0172489	TRUE	3	23	1		N	N	N	N	N	N
A11	1169 31	ins-6	UNKNOWN	FAM	NFQ-MGB	2.81937			24.4723	24.4723			-2.89994				-1.49537	TRUE	0.0172489	TRUE	3	23	1		N	N	N	N	N	N
A12	1170 32	ins-6	UNKNOWN	FAM	NFQ-MGB	2.15584			24.3023	24.3023			-2.51282				-1.10825	TRUE	0.0172489	TRUE	3	22	1		N	N	N	N	N	N
B1	N2 35	Y45F10D.4	UNKNOWN	FAM	NFQ-MGB				26.6561	26.6561								TRUE	0.581275	TRUE	3	19	1		N	N	N	N	N	N
B2	499 36	Y45F10D.4	UNKNOWN	FAM	NFQ-MGB				26.6914	26.6914								TRUE	0.581275	TRUE	3	19	1		N	N	N	N	N	N
B3	1169 39	Y45F10D.4	UNKNOWN	FAM	NFQ-MGB				27.7152	27.7152								TRUE	0.581275	TRUE	3	21	1		N	N	N	N	N	N
B4	1170 40	Y45F10D.4	UNKNOWN	FAM	NFQ-MGB				27.1629	27.1629								TRUE	0.581275	TRUE	3	20	1		N	N	N	N	N	N
B5	N2 35	raga-1	UNKNOWN	FAM	NFQ-MGB	1.05221			21.2493	21.2493			-5.40679				-0.0734253	TRUE	0.0209127	TRUE	3	19	1		N	N	N	N	N	N
B6	499 36	raga-1	UNKNOWN	FAM	NFQ-MGB				Undetermined									TRUE	0.0209127	TRUE	3	39	1		N	Y	N	N	Y	N
B7	1169 39	raga-1	UNKNOWN	FAM	NFQ-MGB	0.845303			22.6243	22.6243			-5.09091				0.24246	TRUE	0.0209127	TRUE	3	20	1		N	N	N	N	N	N
B8	1170 40	raga-1	UNKNOWN	FAM	NFQ-MGB	0.0452914			26.2941	26.2941			-0.86875				4.46462	TRUE	0.0209127	TRUE	3	24	1		N	N	N	N	N	N
B9	N2 35	ins-6	UNKNOWN	FAM	NFQ-MGB	0.859964			25.4692	25.4692			-1.18692				0.217651	TRUE	0.0172489	TRUE	3	23	1		N	N	N	N	N	N
B10	499 36	ins-6	UNKNOWN	FAM	NFQ-MGB	1.08626			25.1675	25.1675			-1.52394				-0.119375	TRUE	0.0172489	TRUE	3	23	1		N	N	N	N	N	N
B11	1169 39	ins-6	UNKNOWN	FAM	NFQ-MGB	1.95898			25.3406	25.3406			-2.37467				-0.970104	TRUE	0.0172489	TRUE	3	23	1		N	N	N	N	N	N
B12	1170 40	ins-6	UNKNOWN	FAM	NFQ-MGB	1.98035			24.7726	24.7726			-2.39033				-0.985756	TRUE	0.0172489	TRUE	3	23	1		N	N	N	N	N	N
C1	N2 43	Y45F10D.4	UNKNOWN	FAM	NFQ-MGB				26.4984	26.4984								TRUE	0.581275	TRUE	3	19	1		N	N	N	N	N	N
C2	499 44	Y45F10D.4	UNKNOWN	FAM	NFQ-MGB				26.633	26.633								TRUE	0.581275	TRUE	3	20	1		N	N	N	N	N	N
C3	1169 47	Y45F10D.4	UNKNOWN	FAM	NFQ-MGB				27.9433	27.9433								TRUE	0.581275	TRUE	3	21	1		N	N	N	N	N	N
C4	1170 48	Y45F10D.4	UNKNOWN	FAM	NFQ-MGB				27.1969	27.1969								TRUE	0.581275	TRUE	3	20	1		N	N	N	N	N	N
C5	N2 43	raga-1	UNKNOWN	FAM	NFQ-MGB	1.34266			20.7399	20.7399			-5.75846				-0.425089	TRUE	0.0209127	TRUE	3	19	1		N	N	N	N	N	N
C6	499 44	raga-1	UNKNOWN	FAM	NFQ-MGB				Undetermined									TRUE	0.0209127	TRUE	3	39	1		N	N	N	N	Y	N
C7	1169 47	raga-1	UNKNOWN	FAM	NFQ-MGB	0.614678			23.312	23.312			-4.63127				0.702097	TRUE	0.0209127	TRUE	3	21	1		N	N	N	N	N	N
C8	1170 48	raga-1	UNKNOWN	FAM	NFQ-MGB	0.0254327			27.1607	27.1607			-0.0361958				5.29717	TRUE	0.0209127	TRUE	3	25	1		N	N	N	N	N	N
C9	N2 43	ins-6	UNKNOWN	FAM	NFQ-MGB	0.894337			25.2549	25.2549			-1.24346				0.16111	TRUE	0.0172489	TRUE	3	23	1		N	N	N	N	N	N
C10	499 44	ins-6	UNKNOWN	FAM	NFQ-MGB	0.725855			25.6907	25.6907			-0.942324				0.462246	TRUE	0.0172489	TRUE	3	24	1		N	N	N	N	N	N
C11	1169 47	ins-6	UNKNOWN	FAM	NFQ-MGB	1.86578			25.6389	25.6389			-2.30435				-0.899778	TRUE	0.0172489	TRUE	3	24	1		N	N	N	N	N	N
C12	1170 48	ins-6	UNKNOWN	FAM	NFQ-MGB	2.87015			24.2712	24.2712			-2.92569				-1.52112	TRUE	0.0172489	TRUE	3	23	1		N	N	N	N	N	N
D1	27 -	Y45F10D.4	UNKNOWN	FAM	NFQ-MGB				Undetermined									TRUE	0.581275	TRUE	3	39	1		N	N	N	N	Y	N
D2	28 -	Y45F10D.4	UNKNOWN	FAM	NFQ-MGB				Undetermined									TRUE	0.581275	TRUE	3	39	1		N	Y	N	N	Y	N
D3	31 -	Y45F10D.4	UNKNOWN	FAM	NFQ-MGB				Undetermined									TRUE	0.581275	TRUE	3	39	1		N	Y	N	N	Y	N
D4	32 -	Y45F10D.4	UNKNOWN	FAM	NFQ-MGB				Undetermined									TRUE	0.581275	TRUE	3	39	1		N	N	N	N	Y	N
D5	27 -	raga-1	UNKNOWN	FAM	NFQ-MGB				Undetermined									TRUE	0.0209127	TRUE	3	39	1		N	N	N	N	Y	N
D6	28 -	raga-1	UNKNOWN	FAM	NFQ-MGB				Undetermined									TRUE	0.0209127	TRUE	3	39	1		N	Y	N	N	Y	N
D7	31 -	raga-1	UNKNOWN	FAM	NFQ-MGB				Undetermined									TRUE	0.0209127	TRUE	3	39	1		N	Y	N	N	Y	N
D8	32 -	raga-1	UNKNOWN	FAM	NFQ-MGB				Undetermined									TRUE	0.0209127	TRUE	3	14	1		N	N	N	N	N	N
D9	27 -	ins-6	UNKNOWN	FAM	NFQ-MGB				Undetermined									TRUE	0.0172489	TRUE	3	39	1		N	N	N	N	Y	N
D10	28 -	ins-6	UNKNOWN	FAM	NFQ-MGB				Undetermined									TRUE	0.0172489	TRUE	3	39	1		N	Y	N	N	Y	N
D11	31 -	ins-6	UNKNOWN	FAM	NFQ-MGB				Undetermined									TRUE	0.0172489	TRUE	3	39	1		N	Y	N	N	Y	N
D12	32 -	ins-6	UNKNOWN	FAM	NFQ-MGB				Undetermined									TRUE	0.0172489	TRUE	3	39	1		N	N	N	N	Y	N
E1	35 -	Y45F10D.4	UNKNOWN	FAM	NFQ-MGB				Undetermined									TRUE	0.581275	TRUE	3	39	1		N	Y	N	N	Y	N
E2	36 -	Y45F10D.4	UNKNOWN	FAM	NFQ-MGB				Undetermined									TRUE	0.581275	TRUE	3	39	1		N	Y	N	N	Y	N
E3	39 -	Y45F10D.4	UNKNOWN	FAM	NFQ-MGB				Undetermined									TRUE	0.581275	TRUE	3	35	1		N	N	N	N	N	N
E4	40 -	Y45F10D.4	UNKNOWN	FAM	NFQ-MGB				Undetermined									TRUE	0.581275	TRUE	3	39	1		N	Y	N	N	Y	N
E5	35 -	raga-1	UNKNOWN	FAM	NFQ-MGB				Undetermined									TRUE	0.0209127	TRUE	3	39	1		N	N	N	N	Y	N
E6	36 -	raga-1	UNKNOWN	FAM	NFQ-MGB				Undetermined									TRUE	0.0209127	TRUE	3	39	1		N	N	N	N	Y	N
E7	39 -	raga-1	UNKNOWN	FAM	NFQ-MGB				37.2247	37.2247								TRUE	0.0209127	TRUE	3	35	1		N	N	N	N	N	N
E8	40 -	raga-1	UNKNOWN	FAM	NFQ-MGB				Undetermined									TRUE	0.0209127	TRUE	3	39	1		N	Y	N	N	Y	N
E9	35 -	ins-6	UNKNOWN	FAM	NFQ-MGB				Undetermined									TRUE	0.0172489	TRUE	3	39	1		N	Y	N	N	Y	N
E10	36 -	ins-6	UNKNOWN	FAM	NFQ-MGB				Undetermined									TRUE	0.0172489	TRUE	3	38	1		N	N	N	N	Y	N
E11	39 -	ins-6	UNKNOWN	FAM	NFQ-MGB				Undetermined									TRUE	0.0172489	TRUE	3	38	1		N	Y	N	N	Y	N
E12	40 -	ins-6	UNKNOWN	FAM	NFQ-MGB				Undetermined									TRUE	0.0172489	TRUE	3	39	1		N	Y	N	N	Y	N
F1	43 -	Y45F10D.4	UNKNOWN	FAM	NFQ-MGB				Undetermined									TRUE	0.581275	TRUE	3	39	1		N	N	N	N	Y	N
F2	44 -	Y45F10D.4	UNKNOWN	FAM	NFQ-MGB				Undetermined									TRUE	0.581275	TRUE	3	35	1		N	N	N	N	N	N
F3	47 -	Y45F10D.4	UNKNOWN	FAM	NFQ-MGB				Undetermined									TRUE	0.581275	TRUE	3	39	1		N	Y	N	N	Y	N
F4	48 -	Y45F10D.4	UNKNOWN	FAM	NFQ-MGB				Undetermined									TRUE	0.581275	TRUE	3	39	1		N	Y	N	N	Y	N
F5	43 -	raga-1	UNKNOWN	FAM	NFQ-MGB				Undetermined									TRUE	0.0209127	TRUE	3	39	1		N	Y	N	N	Y	N
F6	44 -	raga-1	UNKNOWN	FAM	NFQ-MGB				Undetermined									TRUE	0.0209127	TRUE	3	39	1		N	Y	N	N	Y	N
F7	47 -	raga-1	UNKNOWN	FAM	NFQ-MGB				Undetermined									TRUE	0.0209127	TRUE	3	39	1		N	Y	N	N	Y	N
F8	48 -	raga-1	UNKNOWN	FAM	NFQ-MGB				Undetermined									TRUE	0.0209127	TRUE	3	39	1		N	Y	N	N	Y	N
F9	549 34	ins-6	UNKNOWN	FAM	NFQ-MGB	2.54584			23.7936	23.7936			-2.75271				-1.34814	TRUE	0.0172489	TRUE	3	21	1		N	N	N	N	N	N
F10	44 -	ins-6	UNKNOWN	FAM	NFQ-MGB				Undetermined									TRUE	0.0172489	TRUE	3	39	1		N	Y	N	N	Y	N
F11	47 -	ins-6	UNKNOWN	FAM	NFQ-MGB				Undetermined									TRUE	0.0172489	TRUE	3	39	1		N	Y	N	N	Y	N
F12	48 -	ins-6	UNKNOWN	FAM	NFQ-MGB				25.2334	25.2334								TRUE	0.0172489	TRUE	3	12	1		N	N	N	N	N	N
G1	549 34	Y45F10D.4	UNKNOWN	FAM	NFQ-MGB				26.5463	26.5463								TRUE	0.581275	TRUE	3	20	1		N	N	N	N	N	N
G2	549 42	Y45F10D.4	UNKNOWN	FAM	NFQ-MGB				26.5134	26.5134								TRUE	0.581275	TRUE	3	20	1		N	N	N	N	N	N
G3		Y45F10D.4	UNKNOWN	FAM	NFQ-MGB				Undetermined									TRUE	0.581275	TRUE	3	38	1		Y	N	N	Y	Y	N
G4		Y45F10D.4	UNKNOWN	FAM	NFQ-MGB				Undetermined									TRUE	0.581275	TRUE	3	10	1		Y	N	N	Y	N	N
G5	549 34	raga-1	UNKNOWN	FAM	NFQ-MGB	6.1315			18.5967	18.5967			-7.94961				-2.61624	TRUE	0.0209127	TRUE	3	16	1		N	N	N	N	N	N
G6	549 42	raga-1	UNKNOWN	FAM	NFQ-MGB	5.1039			18.8285	18.8285			-7.68497				-2.3516	TRUE	0.0209127	TRUE	3	16	1		N	N	N	N	N	N
G7		raga-1	UNKNOWN	FAM	NFQ-MGB				Undetermined									TRUE	0.0209127	TRUE	3	38	1		Y	N	Y	Y	Y	N
G8		raga-1	UNKNOWN	FAM	NFQ-MGB				Undetermined									TRUE	0.0209127	TRUE	3	39	1		Y	N	N	Y	Y	N
G9	43 -	ins-6	UNKNOWN	FAM	NFQ-MGB				Undetermined									TRUE	0.0172489	TRUE	3	39	1		N	N	N	N	Y	N
G10	549 42	ins-6	UNKNOWN	FAM	NFQ-MGB	1.69814			24.3449	24.3449			-2.16853				-0.763958	TRUE	0.0172489	TRUE	3	22	1		N	N	N	N	N	N
G11		ins-6	UNKNOWN	FAM	NFQ-MGB				Undetermined	5.51203								TRUE	0.0172489	TRUE	3	39	1		Y	N	N	Y	Y	N
G12		ins-6	UNKNOWN	FAM	NFQ-MGB				5.51203	5.51203								TRUE	0.0172489	TRUE	3	31	1		Y	N	N	Y	N	N
H1	34 -	Y45F10D.4	UNKNOWN	FAM	NFQ-MGB				Undetermined									TRUE	0.581275	TRUE	3	39	1		N	Y	N	N	Y	N
H2	42 -	Y45F10D.4	UNKNOWN	FAM	NFQ-MGB				Undetermined									TRUE	0.581275	TRUE	3	39	1		N	Y	N	N	Y	N
H3		Y45F10D.4	UNKNOWN	FAM	NFQ-MGB				Undetermined									TRUE	0.581275	TRUE	3	38	1		Y	N	N	Y	Y	N
H4		Y45F10D.4	UNKNOWN	FAM	NFQ-MGB				Undetermined									TRUE	0.581275	TRUE	3	39	1		Y	N	Y	Y	Y	N
H5	34 -	raga-1	UNKNOWN	FAM	NFQ-MGB				30.3281	30.3281								TRUE	0.0209127	TRUE	3	27	1		N	N	N	N	N	N
H6	42 -	raga-1	UNKNOWN	FAM	NFQ-MGB				32.308	32.308								TRUE	0.0209127	TRUE	3	30	1		N	N	N	N	N	N
H7		raga-1	UNKNOWN	FAM	NFQ-MGB				Undetermined									TRUE	0.0209127	TRUE	3	39	1		Y	N	N	Y	Y	N
H8		raga-1	UNKNOWN	FAM	NFQ-MGB				Undetermined									TRUE	0.0209127	TRUE	3	39	1		Y	N	N	Y	Y	N
H9	34 -	ins-6	UNKNOWN	FAM	NFQ-MGB				Undetermined									TRUE	0.0172489	TRUE	3	38	1		N	Y	N	N	Y	N
H10	42 -	ins-6	UNKNOWN	FAM	NFQ-MGB				Undetermined									TRUE	0.0172489	TRUE	3	39	1		N	Y	N	N	Y	N
H11		ins-6	UNKNOWN	FAM	NFQ-MGB				Undetermined	5.51203								TRUE	0.0172489	TRUE	3	38	1		Y	N	N	Y	Y	N
H12		ins-6	UNKNOWN	FAM	NFQ-MGB				Undetermined	5.51203								TRUE	0.0172489	TRUE	3	26	1		Y	N	N	Y	N	Y
Analysis Type	Singleplex
Endogenous Control	Y45F10D.4
RQ Min/Max Confidence Level	95.0
Reference Sample	N2 27
