# Supplementary material for: Neuronal TORC1 modulates longevity via AMPK and cell nonautonomous regulation of mitochondrial dynamics in C. elegans
Source: eLife journal article supplement (doi:10.7554/elife.49158), 2019-08-14
Supplement: supp [file elife-49158-supp-v1.zip › elife_poa_e49158_Figure_4_source_data_1.xlsx]

## Sheet: %coverage
Young				Old
Wild type	raga-1(ok386)	raga-1 neuronal rescue		Wild type	raga-1(ok386)	raga-1 neuronal rescue
31.985	44.922	7.66		23.121	32.806	8.353
36.132	44.664	13.657		29.71	29.533	14.952
34.744	34.188	13.409		21.924	29.109	6.97
35.797	37.81	13.981		23.192	32.87	19.369
34.903	24.647	34.024		18.861	32.716	12.79
15.214	22.444	41.045		17.689	23.638	19.984
25.314	25.069	8.946		22.03	26.756	6.379
35.649	36.184	22.689		19.602	29.673	11.311
29.026	14.118	22.812		29.765	28.512	11.534
26.761	41.468	25.182		19.948	17.456	18.414
34.332	33.875	34.389		12.304	19.363	16.736
28.939	34.159	21.905		14.661	11.54	17.702
23.963	35.299	21.185		30.914	12.157	10.196
						19.105
37.194	35.231	11.195		22.96	31.152
				25.076		13.708
31.985	23.029	19.9861			23.483
				20.897		11.906
36.024	42.474	9.98613			21.988
				18.989	33.506	15.043
34.744	35.71	14.87
				11.651	27.077	7.458
35.797	23.05	18.987
				22.856	20.922	9.533
34.903	34.979	27.987
40.658	33.795			22.446	26.601	23.509
		13.9867
34.921	17.563			21.436	26.271	23.66
		18.97
12.473	16.349			23.855	24.752	8.185
		11.097
22.994	15.873	24.079		20.509	24.258	19.563
32.777	15.998	19.79		24.325	24.768	18.325
32.225	15.113	15.88		20.242	23.714	16.83
14.11	34.492	14.22		14.975	26.641	10.213
17.489	35.79	19.845		15.802	17.695	20.498
44.947	34.91	22.333		14.564	14.779
34.042	34.673	26.392		29.316	31.852
41.111	34.494	31.294		11.107	36.891
43.541	26.469	34.032			34.326
25.902	25.964	25.851			34.815
21.394	24.304	39.798
33.179	12.64	40.233
25.551	13.479	25.213
	35.962	18.434
	28.373
	33.172
	31.644
	24.86
	12.35

## Sheet: Object area
Young				Old
Wild type	raga-1(ok386)	raga-1 neuronal rescue		Wild type	raga-1(ok386)	raga-1 neuronal rescue
0.814326	0.839552	0.171443		0.477205	0.474338	0.144401
0.934414	0.63088	0.440576		0.559652	0.411388	0.105735
1.41473	0.516799	0.413622		0.371962	0.559847	0.04108
1.07049	1.29801	0.20077		0.448266	0.448409	0.21065
0.629227	0.907107	0.409073		0.466755	0.481396	0.306477
1.18677	0.840444	0.230996		0.660732	0.463523	0.256793
0.862667	0.750845	0.154419		0.369681	0.491366	0.188742
0.524155	1.212	0.772894		0.483804	0.488673	0.383736
1.29014	0.652184	0.34962		0.300753	0.483643	0.154985
0.5962	0.664397	0.329824		0.316626	0.482327	0.267787
1.31175	0.525138	0.911996		0.402485	0.372015	0.199017
0.35178	0.693692	0.242256		0.388457	0.697588	0.281603
0.96619	0.711299	0.237197		0.295707	0.286763	0.260002
0	0.925334	0.215474		1.1265	0.519046
	0.994091				0.760041
	0.705623				0.391731
	0.855554
0.76806	0.57573	0.40975		0.386477	0.327313	0.0800455
1.01294	0.990828	0.314729		0.552166	0.432764	0.0776822
0.913176	0.986688	0.568593		0.339713	0.270531	0.45345
0.984035	0.908122	0.536782		0.829819	0.232029	0.266508
0.661363	1.23358	0.404785		0.625172	0.398967	0.153457
0.965673	0.887662	0.449081		0.361967	0.479768	0.16355
0.866718	0.540351	0.208173		0.425183	0.280748	0.0736737
0.811137	0.64974	0.235166		0.440484	0.325728	0.0741856
0.808351	0.890521	0.239218		0.300654	0.801313	0.298328
1.12508	1.12456	0.308499		0.43496	1.0837	0.380649
0.787649	0.864674	0.553494		0.363177	0.452363	0.328301
0.69712	1.01957	0.40301		0.363845	0.380507	0.340888
1.06058	1.07092	0.681473		0.481169	0.362583	0.330989
0.886813	1.0195	0.534272		0.305364	1.06403	0.262259
0.845156	1.06031	0.51128		0.872103	0.364811
0.808194	0.80291	0.366117		0.364073	0.326957
	0.483562	0.294949
	0.576508	0.75806
	1.17068	0.308671
	0.522679	0.289648
	0.853444	0.57065
	0.856785	0.352623

## Sheet: Object length
Young				Old
Wild type	raga-1(ok386)	raga-1 neuronal rescue		Wild type	raga-1(ok386)	raga-1 neuronal rescue
1.321	1.277	1.214		1.144	0.85	0.67
1.439	1.168	1.173		0.679	1.456	0.669
1.665	1.294	1.425		0.685	1.406	0.891
1.428	1	0.604		1.3	0.701	0.484
1.297	1.36	1.42		0.81	0.768	0.484
1.431	1.27	1.135		0.863	0.785	0.58
1.416	1.288	0.873		0.498	1.238	0.779
1.304	1.262	1.247		0.614	1.314	0.663
1.873	1.137	1.417		0.635	1.124	0.581
0.992	1.432	1.423		0.99	1.003	0.578
1.317	1.349	1.277		0.8	1.293	0.613
1.155	1.401	1.401		0.729	1.239	0.47
1.029	1.228	1.175		0.837	1.414	0.567
1.355	1.504	0.919		0.97	0.955
	1.154				1.243
	1.174				1.294
	1.357
1.324	1.479	0.804		0.669	0.571	0.563
1.527	1.632	0.95		0.959	0.626	0.793
1.422	1.443	1.624		0.619	1.269	0.641
1.524	1.437	0.888		0.94	1.477	0.411
1.169	1.713	1.509		1.04	0.722	0.6
1.508	1.359	1.618		0.537	1.221	0.493
1.309	1.519	0.696		0.846	1.425	0.609
1.486	1.773	1.48		0.501	1.551	0.63
1.239	1.446	0.656		1.372	1.209	0.735
1.529	1.619	1.517		1.111	1.511	0.842
1.314	1.444	1.648		0.96	1.12	0.713
1.007	1.479	1.603		0.727	1.344	0.278
1.627	1.787	1.284		0.717	0.883	0.883
1.265	1.552	1.551		0.683	1.245	0.689
1.444	1.654	1.394		0.756	1.361
1.154	1.347	1.564		0.887	1.419
	1.526	1.496
	1.683	1.539
	1.508	1.597
	1.653	1.485
	1.33	1.244
	1.533	1.359

## Sheet: Object  per square micrometer
Young				Old
Wild type	raga-1(ok386)	raga-1 neuronal rescue		Wild type	raga-1(ok386)	raga-1 neuronal rescue
0.392779	0.535071	0.446795		0.484509	0.691617	0.578459
0.386681	0.707963	0.30998		0.530865	0.717887	1.4141
0.245588	0.661533	0.324185		0.589415	0.519946	1.69669
0.334397	0.291291	0.696368		0.517371	0.733036	0.919489
0.554696	0.27171	0.831734		0.404088	0.679607	0.72668
0.128197	0.267049	0.757144		0.267718	0.509964	1.34584
0.293439	0.333877	0.579334		0.595919	0.544522	0.604727
0.680124	0.298549	0.293559		0.405164	0.607216	0.512778
0.224983	0.216473	0.65248		0.989684	0.589526	0.744202
0.448859	0.624145	0.763499		0.630018	0.361912	1.15007
0.261726	0.645069	0.377074		0.305701	0.52049	1.46943
0.822645	0.492423	0.904208		0.377416	0.165427	0.628615
0.248015	0.496261	0.893139		1.04543	0.423939	0.39215
0.699518	0.380738	0.519552		0.203817	0.600179	0.937687
0.584847	0.231659	0.533697		0.301466	0.30897	0.86287
0.146522	0.601936	0.770109		0.413933	0.561304	0.425082
0.198061	0.41739	0.496767		0.660734	0.827252	0.946139
0.435938	0.638192	0.468274		0.258321	0.483451	1.39982
0.506288	0.23803	0.692188		0.381575	0.983287	0.904051
0.191548	0.120742	0.462728		0.566598	1.13223	0.864697
0.124774	0.166599	0.766635		0.572107	0.620402	0.477025
0.852448	0.247236	0.810372		0.45954	0.50562	0.671958
0.432214	0.177558	0.704058		0.498081	0.882214	1.87722
0.338932	0.6034	0.62391		0.363298	0.728031	1.86938
0.351322	0.466698	0.957645		0.401016	0.332467	0.376153
0.370297	0.406559	0.867927		0.805728	0.163283	0.551964
0.22512	0.440292	0.394691		0.230834	0.326706	0.64982
0.352843	0.326666	0.69545		0.609193	0.837093
0.309958	0.301925	0.387038		0.298535	1.01745
0.448718	0.147342	0.344172		0.568137	0.322604
	0.27631	0.406175			0.95433
	0.276747	0.346776			1.06482
	0.0921047	0.779654
	0.455299	0.995505
	0.605874	0.413997
	0.323662	0.505401

## Sheet: Network
Young				Old
Wild type	raga-1(ok386)	raga-1 neuronal rescue		Wild type	raga-1(ok386)	raga-1 neuronal rescue
190	310	120		70	200	240
250	230	290		430	190	130
210	60	170		140	250	490
190	360	160		220	170	270
220	240	200		360	100	310
250	220	330		350	40	210
310	350	310		270	230	150
170	110	370		320	260	340
150	150	330		150	150	400
280	190	210		180	200	430
140	50	320		90	300	150
330	130	200		80	140	400
460	190	280		140	110	190
290	80	200		70	90	490
200	90	110		410	80	230
120	220	150		330	240	520
150	170	250		280	80	160
60	60	220		290	200	130
590	150	140		160	180	170
200	150	290		320	110	360
180	90	60		410	170	130
410	300	100		120	100	160
90	110	160		260	200	180
200	300	150		120	50	270
110	120	340		110	210	100
100	150	70		290	160	120
140	90	60		440	240
	120	80		170	270
	190	120		260	270
	90	370		350	200
	90	160			210
	70	160			200
	90	140
	100	360
		200
		210

## Sheet: Junction points
Young				Old
Wild type	raga-1(ok386)	raga-1 neuronal rescue		Wild type	raga-1(ok386)	raga-1 neuronal rescue
2040	2770	2260		640	1090	1030
1920	2080	2490		1270	250	800
1780	1650	1980		1280	130	520
1980	910	1280		690	600	860
3280	1480	2820		850	960	1360
1720	1090	1470		750	900	930
1320	850	2620		540	590	650
2060	1180	1460		1560	510	580
980	960	2150		1260	270	1290
920	1340	2200		830	820	800
530	2230	1550		1770	1190	500
3240	1180	1930		1800	830	640
1510	720	2120		1040	860	990
3020	1270	800		1320	850	350
3000	1960	1760		1880	200	1200
2990	1370	1830		670	510	1410
2660	1950	1520		1040	460	340
2070	2040	2130		600	190	740
3110	2120	2530		1720	410	350
2540	1550	3010		710	630	480
2100	1360	1540		820	230	950
1570	1530	3250		1100	330	810
2550	1680	1690		1820	870	890
3320	1360	1980		1100	320	780
1730	2300	2380		2010	160	470
2410	2130	3420		510	170	1310
3300	900	2560		1390		1440
	1560	2570		760		510
	1630	2080		1310		830
	2380	2320		1600		680
	530	1280				690
	1350	2360				820
	1760	1620
	1330	1590
	1190
	1440
