# Supplementary material for: Neuronal TORC1 modulates longevity via AMPK and cell nonautonomous regulation of mitochondrial dynamics in C. elegans
Source: eLife journal article supplement (doi:10.7554/elife.49158), 2019-08-14
Supplement: supp [file elife-49158-supp-v1.zip › elife_poa_e49158_Figure_4_source_data_2.xlsx]

## Sheet: Object count
Young		Old
Wild type	raga-1(ok386)	Wild type	raga-1(ok386)
365	309	223	350
362	308	254	229
334	323	279	305
357	273	335	262
264	160	284	196
330	271	299	245
378	270	197	184
227	321	300	250
221	237	241	291
285	214	345	282
438	294	328	442
303	242	263	168
275	198	264	387
197	220	482	328
341	159	466	348
224	322	368	457
250	222	576	293
302	277	519	448
300	300	480	379
325	181	525	280
323	211	505	217
335	306	408	285
344	248	387	261
381	321	390	324
235	321	497	393
275	301	523	320
			267
295	252	426	309
316	262	416	305
275	216	395	229
305	243	360	230
355	247	320	197
216	169	398	240
301	265	420	217
292	194	364	332
200	230	480	207
278	325	375	227
257	167	463	249
196	263	426	222
258		378	282
286		451
		331

## Sheet: Object length
Young		Old
Wild type	raga-1(ok386)	Wild type	raga-1(ok386)
10.48	11.31	6.6	8.58
3.82	10.36	4.79	8.19
9.79	5.84	3.52	8.25
8.49	8.33	3.37	8.12
11.11	7.57	8.12	7.96
4.32	8.95	8.84	8.09
3.28	9.09	5.53	7.91
9.39	4.73	5.73	7.65
8.04	3.14	8.54	9.26
8.29	6.11	6.02	8.09
3.81	5.73	3.97	8.05
7.83	6.53	8.16	8.73
9.47	5.84	3.6	11.82
8.73	9.49	5.13	7.41
7.8	7.68	8.13	4.04
8.94	8.22	7.86	10.99
8.59	8.56	6.38	8.71
5.95	5.75	4.72	5.1
4.77	5.96	4.23	3.89
8.93	10.85	4.34	12.13
8.32	6.98	5.58	9.87
8.52	9.42	9.03	8.16
7.87	8.77	8.2	5.66
5.44	8.45	7.81	10.49
7.91	8.98	4.49	11.85
8.13	8.32	4.75	11.43
			9.03
7.49	8.68	7.92	7.62
7.08	8.09	7.58	7.19
5.92	8.73	6.86	7.69
6.94	7.85	7.71	7.46
7.34	8.2	7.59	7.05
7.97	8.11	4.07	7.54
7.88	8.83	7.67	7.19
7.42	8.03	7.38	7.55
8.51	8.79	7.68	7.06
7.04	7.19	3.38	7.55
7.94	7.94	6.86	6.77
7.21	8.76	7.75	5.35
6.58		6.04	7.93
6.95		4.06
		5.77

## Sheet: Object area
Young		Old
Wild type	raga-1(ok386)	Wild type	raga-1(ok386)
6.89	4.524	4.62	7.722
6.73	4.144	3.353	7.371
7.6	8.336	2.464	7.425
6.6	3.332	2.359	7.308
5.3	8.028	5.684	7.164
6.66	9.58	6.188	7.281
6.7	3.636	3.871	7.119
7.56	11.892	4.011	6.885
6.75	7.256	5.978	8.334
6.36	8.444	4.214	7.281
6.11	4.292	2.779	6.984
4.75	5.877	5.712	9.456
7.67	5.256	2.52	5.928
5.82	8.541	3.591	3.232
7.01	6.912	5.691	8.792
6.14	7.398	5.502	6.968
6.64	7.704	4.466	4.08
7.44	5.175	3.304	3.112
6.58	5.364	2.961	9.704
6.97	9.765	3.038	6.44
5.94	6.282	3.906	6.44
6.26	8.478	6.321	6.44
6.16	7.893	5.74	6.44
7.22	7.605	5.467	6.44
5.89	8.082	3.143	6.44
7.56	7.488	3.325	6.44
2.996	6.944	5.544	6.096
2.832	6.472	5.306	5.752
3.368	6.984	4.802	6.152
8.776	6.28	5.397	5.968
2.936	6.56	5.313	5.64
5.188	6.488	2.849	6.032
3.152	7.064	5.369	5.752
2.968	6.424	5.166	6.04
3.404	7.032	5.376	5.648
6.816	5.752	2.366	6.04
7.176	6.352	4.802	5.416
4.884	7.008	5.425	4.28
4.632		4.228	6.344
2.78		2.842
		4.039
