# Supplementary material for: Neuronal TORC1 modulates longevity via AMPK and cell nonautonomous regulation of mitochondrial dynamics in C. elegans
Source: eLife journal article supplement (doi:10.7554/elife.49158), 2019-08-14
Supplement: supp [file elife-49158-supp-v1.zip › elife_poa_e49158_Figure_4_source_data_3.xlsx]

## Sheet: raw data and percentage
Raw counts
	Fragmented	Intermediate	Fused	Total
Wild type_day 1	7	11	24	42
Wild type_day 8	20	14	6	40
raga-1_day 1	5	17	20	42
raga-1_day 8	12	14	22	48
Percentages
	Fragmented	Intermediate	Fused
Wild type_day 1	16.66	26.19	57.14
Wild type_day 8	50	35	15
raga-1_day 1	11.9	40.47	47.61
raga-1_day 8	25	29.16	45.83
