# Supplementary material for: Neuronal TORC1 modulates longevity via AMPK and cell nonautonomous regulation of mitochondrial dynamics in C. elegans
Source: eLife journal article supplement (doi:10.7554/elife.49158), 2019-08-14
Supplement: supp [file elife-49158-supp-v1.zip › elife_poa_e49158_Figure_4_source_data_4.xlsx]

## Sheet: %Coverage
Young			Old
Wild type	unc-64(e246)		Wild type	unc-64(e246)
34.602	35.278		25.996	34.421
38.653	33.151		23.175	35.886
34.458	32.249		29.637	34.68
35.548	31.904		23.494	33.184
39.082	30.648		17.284	27.514
39.358	33.58		17.689	31.039
32.787	29.61		21.042	30.047
26.644	32.834		28.772	34.421
37.499	30.419		20.68	27.72
34.602	27.323		34.782	31.036
39.218	36.132		34.414	24.789
35.784	29.083		20.873	26.371
35.112	29.374		29.541	28.795
36.851	36.083		28.971	30.007
38.653	32.4		27.871	28.196
37.098	35.278		26.18	34.744
35.761	33.151		23.845	35.886
34.362	32.249		19.505	30.182
33.861	31.904		27.629	30.71
37.205	30.648		24.405	27.293
36.561	33.58		19.783	31.641
35.1	29.61		21.089	28.533
36.791	32.834		25.598	28.557
37.321	30.419		20.815	33.975
30.859	27.323		35.828	35.917
36.283	36.132		25.389	33.155
39.415	29.083		13.53	28.911
36.472	29.374		13.052	28.053
33.983	36.083		25.681	31.634
35.743	32.4		33.852	31.112
39.825	34.949		30.976	30.164
37.257	34.146		21.856	27.102
34.335	31.541		32.6	29.089
36.977	28.852		28.389	30.835
32.38	32.821		25.019	32.818
32.534	26.755		25.426	27.982
35.345	30.425		21.177	25.616
35.498	30.539		21.783	26.544
35.789	34.726		17.677	30.827
32.627	32.131		25.855	21.499
37.147	32.435		26.629	36.401
32.989	31.709		19.093	35.623
29.356	32.379		12.554	29.379
32.806	32.89		13.949	31.173
26.264	28.408		17.554	30.55
33.195	35.012		22.496	32.94
31.669	30.972		19.922	29.147
31.646	32.551		23.082	32.818
29.134	32.417		21.687	29.392
33.658	21.676		31.118	24.309
27.633	28.32		22.744	21.687
33.859	27.722		21.695	32.777
29.821	30.71		25.288	34.875
35.345	31.354		30.081	33.834
33.889	27.672		28.281	33.055
31.134	28.385		18.087	27.357
33.105	24.541		14.63	28.984
33.763	31.557		11.004	31.732
34.135	28.789		23.885	27.882
32.758	28.532		21.831	31.217
32.704	30.38		11.69	20.186
35.011	25.643		16.539	29.395
34.104	26.051		25.921	30.288
35.021	27.076		28.582	33.198
31.549	31.825		23.124	25.717
30.941	31.133		23.095	29.045
33.552	26.362		17.035	30.977
35.704	31.786		26.852	23.388
36.626	29.264		17.534	24.99
30.214	29.71		23.087	25.507
33.745	29.557		21.781	29.839
28.332	31.07		19.392	32.357
34.873	21.676		28.02	33.785
31.022	28.32		33.142	33.574
32.116	27.722		37.692	28.649
37.976	30.71		31.641	32.489
34.817	31.354		27.879	24.133
36.499	27.672		18.493	24.133
35.148	28.385		23.127	27.951
36.782	24.541		25.809	29.579
37.999	31.557		17.194	32.897
37.623	28.789		9.82	32.897
31.272	28.532		12.009	31.652
35.161	30.38		16.402	22.798
34.512	25.643		21.285	24.894
35.648	26.051		22.873	24.053
37.254	27.076		25.606	31.239
35.109	31.825		15.922	32.341
38.232	31.133		15.415	34.375
34.817	26.362		24.521	29.695
35.268	31.786			21.743
32.901	29.264			32.383
32.29	29.71			25.489
32.456	29.557			22.51
35.153	31.07			20.519
36.499	30.473			22.502
34.512	26.204			29.776
28.285	31.056			32.117
33.973	27.547			33.551
32.008	20.385			32.375
33.732	24.397			31.931
32.143	28.238			35.248
36.347	27.536			28.799
37.064	33.677			34.894
36.668	32.394			28.29
34.568	32.657			35.643
36.782	33.393			35.76
35.686	30.978			32.174
36.464	33.476			33.304
35.161	30.884			32.597
32.053	31.452			35.488
32.123	35.08			36.804
33.41	29.744
	28.689
	31.555
	32.237
	31.611
	34.553
	29.744
	32.859
	32.237
	30.433
	30.932
	29.902
	29.07
	31.09
	29.69
	27.222
	24.053
	31.687
	27.756
	26.887
	31.12
	31.85
	24.56
	30.212
	28.071
	31.245
	23.699
	32.642
	28.681
	28.158
	34.674
	31.268
	30.918
	30.297
	31.337
	33.245
	29.552
	31.577
	31.536
	30.417
	29.572
	31.791
	29.69
	33.58
	29.017
	26.411
	32.042
	28.048
	27.349
	31.744

## Sheet: Object area
Young			Old
Wild type	unc-64(e246)		Wild type	unc-64(e246)
2.50199	0.650542		0.26534	0.860528
2.13389	0.911071		0.334928	0.532886
1.00913	0.815616		0.560776	0.376326
1.42994	0.47971		0.389424	0.623889
2.21916	0.552035		0.444865	0.583652
0.634087	0.785101		0.470041	0.455981
1.69845	0.911875		0.340255	1.06139
0.894705	0.853854		0.751253	0.780724
1.56485	0.850509		0.39034	0.454829
2.45127	0.786432		0.420559	0.524949
2.19157	0.853841		0.565527	0.771419
0.821019	0.276277		0.440074	0.87633
1.2073	0.747869		0.836808	0.464185
2.1821	0.906369		1.65209	0.657576
1.37179	0.800916		0.822685	0.787381
1.98854	0.949413		0.877237	0.541761
1.53435	0.741727		0.544257	0.273334
2.01673	0.815616		0.476094	0.520817
2.011	0.534534		0.757793	0.763347
0.890253	0.431897		0.588168	1.40808
1.23682	0.702021		1.13131	1.04824
2.41722	0.911875		0.675773	1.52818
2.06204	0.954189		0.802121	0.489065
2.48437	0.57791		0.741913	0.51519
1.75068	0.881297		0.782977	1.32621
0.938118	0.853841		0.516366	0.327702
0.912938	1.01162		0.485559	1.65756
2.14244	0.939384		1.8211	0.823835
1.21913	0.813788		0.644664	1.17055
0.947808	0.894263		0.487047	2.0823
1.86044	1.28407		1.46241	1.18337
2.46373	0.667587		0.897107	0.740162
2.1513	0.639918		0.482378	1.17612
1.37892	0.427215		1.44055	1.0942
1.81378	0.840001		1.46384	1.1164
0.652416	1.0203		1.73718	0.987575
0.975057	0.670118		0.803221	1.59434
1.24491	0.664183		1.54206	0.405069
0.944002	0.670024		0.764993	1.26173
1.60978	1.48606		0.572484	0.823775
0.441616	0.748462		0.824111	1.18524
1.14738	1.33719		0.664656	0.58394
1.14208	1.15276		0.72762	1.30576
1.15958	1.26798		1.10659	1.34537
1.51026	1.56217		0.72614	1.54892
1.87976	0.839893		1.99847	0.87319
1.7865	0.841221		0.481507	1.2919
1.84686	1.33342		1.75703	0.792106
0.876439	0.871261		0.906441	0.9209
1.05114	1.26679		0.449201	2.38082
1.86836	0.359617		1.52728	0.943926
1.85023	1.16125		1.59184	1.46941
1.84797	1.3123		0.759606	1.77426
1.31614	0.927441		0.939754	2.3075
0.58084	1.93564		1.60512	2.03769
0.539117	0.948827		0.800496	0.795285
0.833309	1.87785		0.872477	1.93844
1.73019	0.59992		0.402008	0.879008
2.2191	1.47257		1.44282	0.984845
1.86654	0.921118		0.679253	1.13355
1.13904	1.06644		0.36846	0.694073
0.745497	0.983508		0.934493	0.334358
1.47969	1.16622		0.68681	0.524978
0.799589	0.800314		0.572409	0.489476
0.665969	0.848816		1.03142	0.815908
1.77745	2.4993		0.468994	0.455595
0.759579	0.484158		0.561775	0.466396
1.98964	1.31742		0.507367	0.776717
1.78882	1.71109		0.413387	0.671842
1.37769	0.776495		0.629738	2.22405
2.62988	0.711541		0.628634	0.436158
1.9905	1.62377		0.497604	0.484957
2.199	0.906124		0.411991	0.372622
2.77303	1.77077		0.466614	1.71898
1.29587	1.04713		0.647244	0.470477
2.64082	2.30641		0.541293	1.55008
2.88189	1.13282		0.327574	2.00399
1.72291	1.34619		0.316069	0.213133
2.15625	1.09852		0.842908	0.176748
1.73162	0.983232		0.438606	1.27438
1.33646	1.86989		1.26605	0.329052
2.08464	1.39212		0.40667	0.535567
1.83349	0.750511		0.629631	0.953166
1.73589	1.96519		0.405449	0.618862
2.03229	0.493197		1.82404	0.605112
1.98238	1.21233		0.419463	0.351124
2.5996	1.57629		0.699094	0.427552
2.78924	0.655746		0.486573	0.367327
2.40928	2.51692		0.424907	0.461856
2.18626	2.25729		0.515361	1.29628
1.43245	0.606974			1.57215
2.44262	1.00959			1.13477
2.28566	1.29553			0.362144
2.20666	0.814973			0.875636
1.39827	1.95739			0.840399
2.48582	1.57943			1.14882
2.54898	1.12306			0.936579
1.10112	1.92139			0.599261
2.42092	1.92806			1.23041
2.27248	1.50019			1.00459
2.31548	1.74239			1.22197
2.50627	2.45102			1.38492
2.16412	0.556077			1.34766
2.02345	1.5812			0.304244
2.01459	0.687703			0.445417
2.15284	1.71912			0.406995
1.99266	0.876525			1.11118
2.10148	0.897679			0.543767
1.89324	0.894187			0.561801
2.18099	0.688232			0.87398
2.39869	0.851256			0.673766
1.95981	0.577937			0.662753
1.67936	1.66133
	1.55787
	1.00538
	1.61474
	0.8418
	0.678871
	0.804426
	0.853963
	0.581385
	0.844015
	0.853364
	0.759083
	0.964464
	0.934675
	1.01651
	1.2252
	1.7009
	0.909665
	0.819243
	0.631532
	0.448622
	0.580315
	0.411789
	0.610299
	0.985144
	0.851642
	0.661438
	0.937726
	0.637606
	0.976225
	0.381748
	0.392735
	0.664862
	0.420791
	0.512823
	0.600099
	0.853963
	0.846192
	0.979274
	0.591227
	0.834303
	0.754061
	0.913295
	0.57242
	0.564937
	0.851681
	0.916652
	0.818034
	0.732649
	0.561917

## Sheet: Object length
Young			Old
Wild type	unc-64(e246)		Wild type	unc-64(e246)
1.681	1.41		0.968	1.023
1.33	1.335		0.884	0.927
1.227	1.121		1.098	0.752
1.114	0.903		1.092	0.219
1.595	0.987		0.955	0.204
1.44	1.283		0.735	0.262
1.206	1.051		0.659	0.342
1.096	1.053		0.968	0.421
1.111	1.056		0.999	0.698
1.207	1.41		0.743	1.416
1.204	1.275		1.49	0.908
0.872	1.618		0.975	0.686
1.426	1.394		1.654	0.47
1.282	1.232		1.254	0.61
1.94	1.335		1.254	0.583
1.681	1.243		1.228	0.644
1.33	1.133		0.884	0.25
1.227	1.251		0.78	0.293
1.114	1.143		1.593	0.223
1.595	1.161		1.58	0.215
1.44	1.332		1.088	0.345
1.206	0.962		0.96	0.279
1.096	1.279		0.991	0.788
1.111	1.283		1.091	0.263
1.207	1.251		0.806	1.146
1.204	1.147		0.745	1.143
0.872	1.077		1.546	0.671
1.426	1.498		1.165	0.378
1.282	1.376		1.419	1.071
1.94	1.12		1.353	0.879
1.504	1.041		1.015	1.31
2.226	1.301		1.568	0.982
1.477	1.195		1.22	0.696
1.398	1.152		1.505	0.843
1.175	0.994		0.81	0.932
1.97	1.216		0.363	0.924
1.61	1.212		0.961	0.237
1.458	0.93		0.901	0.325
1.003	1.194		0.699	0.231
1.398	1.127		0.431	0.885
1.086	1.209		0.961	0.451
1.329	1.062		0.747	0.27
1.438	1.404		1.377	0.276
1.455	1.492		0.828	0.308
1.581	0.904		1.264	0.234
0.978	1.186		1.022	0.296
1.339	1.368		0.921	0.257
1.258	1.307		0.81	0.926
1.911	0.936		1.005	0.745
1.178	1.129		0.844	0.707
1.797	1.009		0.983	1.18
1.093	0.923		1.086	0.748
0.969	1.293		1.093	0.236
1.23	1.212		1.363	1.272
1.098	1.286		1.066	0.794
1.078	1.415		1.139	0.546
1.015	1.142		1.442	0.845
0.861	1.268		1.195	1.073
1.369	1.157		1.455	1.148
1.953	1.377		1.664	1.208
0.891	1.378		1.024	0.96
1.001	0.958		0.867	0.822
2.003	1.206		0.895	1.756
1.336	1.293		0.958	1.286
1.209	1.603		1.23	0.846
1.077	1.309		1.223	1.5
1.117	1.2		1.023	1.362
1.755	1.126		1.189	0.372
1.514	1.123		0.693	0.504
1.156	1.506		0.278	0.236
1.565	1.417		1.447	0.205
1.213	1.208		1.15	1.263
0.636	1.051		1.335	0.826
0.934	1.25		0.924	0.951
0.989	0.772		1.058	1.14
1.122	1.199		0.824	1.443
1.167	0.982		1.7	0.845
1.213	1.393		1.7	0.877
1.215	1.53		1	1.264
1.086	1.508		0.537	1.095
1.004	1.105		0.735	0.895
1.01	1.512		0.735	0.674
0.891	1.256		1.251	0.31
0.993	1.136		1.063	0.386
1.072	1.039		1.309	0.985
1.416	1.087		1.397	1.183
1.15	1.386		1.205	0.254
1.26	1.138		0.978	0.248
1.414	1.363		0.894	0.882
1.437	0.982		1.468	0.265
1.175	0.904		0.917
1.348	0.864		0.847
1.375	1.43		1.337
1.231	1.179		1.275
1.251	1.442		0.715
1.437	1.393		0.712
1.21	1.039		1.312
1.375	0.766		0.963
1.046	1.294		1.198
1.238	1.17		0.921
1.186	1.064		0.978
1.542	1.734		0.809
1.523	1.445		1.442
1.48	1.003		1.119
0.931	1.048		1.777
1.069	1.458		0.891
1.145	1.508		0.969
1.581	1.089		0.819
1.447	1.402		1.153
1.149	1.136		0.831
1.262	1.315		1.058
0.834	1.268		1.102
	1.354

## Sheet: Objects per square micrometer
Young			Old
Wild type	unc-64(e246)		Wild type	unc-64(e246)
0.138298	0.542286		0.979722	0.399999
0.181138	0.363869		0.691941	0.673427
0.341464	0.395395		0.528499	0.921542
0.248598	0.665069		0.603302	0.531889
0.176112	0.555182		0.388523	0.471411
0.620704	0.427716		0.376329	0.680709
0.193041	0.324716		0.618418	0.283092
0.297796	0.384539		0.382987	0.440886
0.239633	0.357656		0.529795	0.60946
0.141159	0.34743		0.827042	0.591219
0.178949	0.42317		0.60853	0.321343
0.435848	1.05267		0.474307	0.300925
0.290832	0.39277		0.35302	0.620334
0.168878	0.398105		0.17536	0.456328
0.281771	0.404537		0.338781	0.358099
0.186559	0.371577		0.298437	0.641316
0.233069	0.446944		0.43812	1.3129
0.170385	0.395395		0.409688	0.579512
0.168379	0.596857		0.364598	0.402307
0.417915	0.709614		0.414932	0.193832
0.295606	0.478333		0.174869	0.301848
0.145208	0.324716		0.312072	0.186712
0.178421	0.344104		0.319129	0.58391
0.150223	0.526362		0.280558	0.659466
0.176268	0.310032		0.457587	0.270825
0.386764	0.42317		0.491686	1.01174
0.431738	0.287491		0.278648	0.174419
0.170236	0.312694		0.0716709	0.340517
0.278749	0.443396		0.398362	0.270249
0.377112	0.362309		0.695046	0.149412
0.214062	0.272174		0.211815	0.254898
0.151222	0.511484		0.243627	0.366163
0.159601	0.492891		0.675818	0.247331
0.268159	0.675351		0.197071	0.281804
0.178522	0.390726		0.170913	0.293963
0.49867	0.262226		0.146364	0.283341
0.362491	0.454024		0.263651	0.160668
0.285144	0.459798		0.141259	0.655295
0.37912	0.51828		0.231074	0.244323
0.20268	0.216215		0.451628	0.260982
0.84116	0.433355		0.323124	0.307121
0.287517	0.237132		0.287261	0.610045
0.25704	0.280883		0.172535	0.224995
0.282912	0.259388		0.126054	0.231705
0.173904	0.181849		0.241744	0.197234
0.176592	0.416863		0.112566	0.377237
0.177269	0.368179		0.413742	0.225613
0.17135	0.244117		0.131369	0.414313
0.332413	0.37207		0.239254	0.319166
0.320204	0.17111		0.69274	0.102103
0.1479	0.787506		0.148918	0.229753
0.182999	0.238724		0.136289	0.223063
0.161372	0.234017		0.332909	0.196561
0.268551	0.33807		0.320094	0.146626
0.583448	0.14296		0.176192	0.162218
0.5775	0.299159		0.225948	0.34399
0.397272	0.130687		0.167683	0.149522
0.19514	0.52602		0.273726	0.360998
0.153824	0.195501		0.165544	0.28311
0.175501	0.309754		0.321397	0.275392
0.28712	0.284874		0.317266	0.290834
0.469633	0.26073		0.176984	0.879148
0.23048	0.22338		0.377411	0.576939
0.437987	0.338317		0.499328	0.678235
0.473731	0.374934		0.224197	0.315195
0.174075	0.124567		0.492437	0.637519
0.441718	0.544492		0.303235	0.664178
0.179449	0.241275		0.529242	0.301113
0.20475	0.171025		0.424155	0.371963
0.219309	0.382617		0.366613	0.114687
0.128314	0.415394		0.346482	0.684132
0.142336	0.191345		0.389707	0.667214
0.158586	0.239217		0.680111	0.906682
0.111871	0.15993		0.710266	0.195314
0.247834	0.264742		0.582346	0.608935
0.143804	0.133151		0.584545	0.209596
0.120813	0.276779		0.851074	0.120425
0.211845	0.205558		0.585093	1.1323
0.163005	0.258392		0.274372	1.5814
0.212414	0.249595		0.588432	0.232105
0.284326	0.168764		0.135809	0.99975
0.180477	0.2068		0.241474	0.614246
0.17056	0.380167		0.190731	0.332072
0.202553	0.154591		0.404539	0.368386
0.169818	0.519934		0.116692	0.411395
0.179825	0.214884		0.545293	0.685028
0.143307	0.17177		0.366274	0.730648
0.125873	0.485325		0.327227	0.880441
0.158687	0.123695		0.362785	0.744279
0.159254	0.116786		0.475803	0.229079
0.246207	0.52368
0.134695	0.289861
0.141272	0.229327
0.147082	0.362674
0.251404	0.158732
0.146829	0.192937
0.135395	0.233327
0.256875	0.161633
0.140331	0.142874
0.140851	0.135883
0.14568	0.14002
0.12825	0.115209
0.167953	0.495183
0.183172	0.212983
0.182012	0.471047
0.160569	0.189964
0.184587	0.38097
0.169814	0.34509
0.192601	0.374374
0.161216	0.448744
0.133627	0.369478
0.163909	0.606987
