# Supplementary material for: Neuronal TORC1 modulates longevity via AMPK and cell nonautonomous regulation of mitochondrial dynamics in C. elegans
Source: eLife journal article supplement (doi:10.7554/elife.49158), 2019-08-14
Supplement: supp [file elife-49158-supp-v1.zip › elife_poa_e49158_Supplemental_file_1.xlsx]

## Sheet: full_results_wt_vs_raga_04-02-2
gene	baseMean	log2FoldChange	lfcSE	stat	pvalue	padj	symbol
WBGene00000001	838.043	0.243218	0.126048	1.92956	0.053661	0.136372	aap-1
WBGene00000002	423.817	-0.323005	0.252087	-1.28132	0.20008	0.363988	aat-1
WBGene00000003	335.794	-0.113395	0.0860033	-1.3185	0.187337	0.346741	aat-2
WBGene00000004	244.963	0.0306098	0.119183	0.256831	0.797309	0.881006	aat-3
WBGene00000005	362.201	-0.0788745	0.234054	-0.336992	0.736123	0.840563	aat-4
WBGene00000006	350.844	0.370438	0.130938	2.82911	0.0046678	0.0200914	aat-5
WBGene00000007	519.123	-0.223986	0.120936	-1.85211	0.0640104	0.156476	aat-6
WBGene00000008	26.1274	-0.404374	0.365097	-1.10758	0.268044	0.441215	aat-7
WBGene00000009	48.8614	-0.608121	0.263295	-2.30966	0.0209071	0.0666056	aat-8
WBGene00000010	871.613	0.0242184	0.0785689	0.308244	0.757897	0.854664	aat-9
WBGene00000012	0.899936	0.453929	1.72528	0.263105	0.79247	NA	abf-1
WBGene00000013	17.2299	0.933995	0.437533	2.13468	0.0327869	0.0941348	abf-2
WBGene00000014	0	NA	NA	NA	NA	NA	abf-3
WBGene00000015	4.68617	-1.03281	0.697122	-1.48153	0.138466	0.279141	abf-4
WBGene00000016	51.5972	0.652976	0.352641	1.85167	0.0640726	0.156582	abf-5
WBGene00000017	98.2732	0.626122	0.282741	2.21447	0.0267965	0.080699	abf-6
WBGene00000018	969.187	0.0102839	0.108024	0.0952	0.924156	0.955956	abl-1
WBGene00000019	570.413	-0.445052	0.0967741	-4.59888	4.24774e-06	5.37295e-05	abt-1
WBGene00000020	1137.15	0.0464715	0.0706045	0.658194	0.510413	0.672188	abt-2
WBGene00000021	85.7067	-0.477035	0.188312	-2.53322	0.0113021	0.0409033	abt-3
WBGene00000022	2876.45	1.26433	0.1604	7.88231	3.21381e-15	2.11933e-13	abt-4
WBGene00000023	638.753	-0.60006	0.173989	-3.44884	0.000562998	0.00347891	abt-5
WBGene00000024	3945.22	0.194026	0.184618	1.05096	0.293278	0.467556	abu-1
WBGene00000025	39.2947	-0.259796	0.400176	-0.649203	0.516207	0.676331	abu-2
WBGene00000026	0.159542	-0.944473	3.81693	-0.247443	0.804565	NA	abu-3
WBGene00000027	136.037	-0.31212	0.155017	-2.01346	0.0440662	0.117934	abu-4
WBGene00000028	5.0451	0.4249	1.02317	0.415278	0.677939	0.799212	abu-5
WBGene00000029	1904.38	0.0181034	0.24736	0.0731862	0.941658	0.96657	abu-6
WBGene00000030	2092.66	0.118561	0.240233	0.493525	0.621642	0.759276	abu-7
WBGene00000031	4096.94	0.109858	0.220729	0.497704	0.618693	0.75698	abu-8
WBGene00000032	941.061	-0.263377	0.255981	-1.02889	0.303529	0.479212	abu-9
WBGene00000033	1787.3	-0.0196367	0.231437	-0.084847	0.932383	0.960595	abu-10
WBGene00000034	2930.15	-0.0860958	0.164608	-0.523036	0.600949	0.744394	abu-11
WBGene00000035	288.495	0.428956	0.129949	3.30096	0.000963554	0.00548293	ace-1
WBGene00000036	561.406	0.298531	0.14591	2.04599	0.0407575	0.111129	ace-2
WBGene00000037	90.6225	0.231181	0.144184	1.60338	0.108852	0.23367	ace-3
WBGene00000038	21.1694	0.503772	0.328737	1.53245	0.125412	0.259021	ace-4
WBGene00000039	3367	-0.44141	0.429845	-1.02691	0.304465	0.480232	acn-1
WBGene00000040	4478.53	-0.496444	0.115411	-4.30153	1.69625e-05	0.000177098	aco-1
WBGene00000041	22840.1	-0.173432	0.0524361	-3.30748	0.000941378	0.00537875	aco-2
WBGene00000042	63.6793	0.0355192	0.212928	0.166813	0.867517	0.923183	acr-2
WBGene00000043	29.0181	0.459115	0.285289	1.60929	0.107552	0.2315	acr-3
WBGene00000044	22.7172	0.525477	0.296938	1.76965	0.0767855	0.179802	acr-5
WBGene00000045	6.75323	-0.712713	0.621949	-1.14593	0.251822	0.423267	acr-6
WBGene00000046	30.4083	0.274192	0.282283	0.971335	0.331381	0.508673	acr-7
WBGene00000047	136.376	-0.187195	0.170047	-1.10085	0.270964	0.444038	acr-8
WBGene00000048	33.8349	0.231928	0.255497	0.90775	0.36401	0.541134	acr-9
WBGene00000049	7.38994	0.236625	0.565479	0.418452	0.675617	0.797648	acr-10
WBGene00000050	39.2016	0.0833497	0.219665	0.379439	0.704362	0.819096	acr-11
WBGene00000051	82.0881	0.0224397	0.170903	0.131301	0.895538	0.939575	acr-12
WBGene00000053	8.95248	-0.0157003	0.497864	-0.0315353	0.974843	0.985702	acr-14
WBGene00000054	104.352	-0.186144	0.172858	-1.07686	0.281542	0.454698	acr-15
WBGene00000055	127.944	-0.149861	0.167195	-0.896321	0.370081	0.547773	acr-16
WBGene00000056	50.6175	0.319789	1.11161	0.287681	0.773591	0.865596	acr-17
WBGene00000057	61.4234	-0.241035	0.234106	-1.0296	0.303199	0.478851	acr-18
WBGene00000058	28.0344	0.171483	0.300458	0.57074	0.568176	0.719121	acr-19
WBGene00000059	38.9514	0.276864	0.236067	1.17282	0.240868	0.41103	acr-20
WBGene00000060	22.7011	-0.00611689	0.306136	-0.0199809	0.984059	0.990649	acr-21
WBGene00000061	21.2588	0.257991	0.332463	0.775999	0.43775	0.612098	lgc-11
WBGene00000062	15.5332	0.575084	0.420037	1.36913	0.170959	0.325715	acr-23
WBGene00000063	63652.4	-0.0832455	0.108599	-0.766541	0.443354	0.61688	act-1
WBGene00000064	29314.8	-0.589973	0.0898498	-6.56621	5.16108e-11	1.96592e-09	act-2
WBGene00000065	83599.3	0.158412	0.0671556	2.35888	0.0183304	0.0599421	act-3
WBGene00000066	71106.6	-0.0488289	0.0964128	-0.506456	0.612536	0.752866	act-4
WBGene00000067	21513.7	0.0529841	0.0986866	0.536892	0.591342	0.7372	act-5
WBGene00000068	477.446	-0.0363129	0.114859	-0.316152	0.751887	0.851285	acy-1
WBGene00000069	58.2252	0.261223	0.210842	1.23895	0.215362	0.381718	acy-2
WBGene00000070	700.314	0.0871184	0.179762	0.484631	0.627938	0.762729	acy-3
WBGene00000071	340.422	0.0388092	0.203348	0.190851	0.848642	0.911821	acy-4
WBGene00000072	466.374	-0.113443	0.0880578	-1.28828	0.197649	0.360706	add-1
WBGene00000073	335.645	0.245865	0.124783	1.97035	0.0487987	0.127073	add-2
WBGene00000074	696.796	0.0842454	0.108064	0.779585	0.435635	0.61005	adm-2
WBGene00000075	269.994	0.02558	0.111216	0.230004	0.818089	0.893201	adm-4
WBGene00000079	2331.33	-0.211781	0.0803462	-2.63585	0.00839257	0.0322259	adr-1
WBGene00000080	1052.97	0.0592166	0.0798441	0.741652	0.458298	0.629217	adr-2
WBGene00000081	8249.17	0.330973	0.105177	3.14681	0.00165062	0.00854713	ads-1
WBGene00000082	2139.51	0.0478205	0.201235	0.237636	0.812164	0.889818	adt-1
WBGene00000083	1613.93	-0.145461	0.076649	-1.89775	0.0577293	0.144271	adt-2
WBGene00000084	390.338	0.473565	0.141833	3.33889	0.000841145	0.00489335	aex-1
WBGene00000085	25.5118	-0.369307	0.288299	-1.28099	0.200198	0.364164	aex-2
WBGene00000086	497.89	0.0911446	0.0874884	1.04179	0.297509	0.472245	aex-3
WBGene00000088	739.64	0.110977	0.0842109	1.31784	0.187557	0.346976	aex-5
WBGene00000089	214.023	0.231639	0.122249	1.89481	0.058117	0.144958	aex-6
WBGene00000090	1064.03	0.157241	0.0496449	3.16731	0.00153858	0.0080599	age-1
WBGene00000092	540.783	0.423964	0.114707	3.69605	0.000218976	0.00157271	ags-3
WBGene00000093	358.79	-0.156523	0.0989502	-1.58184	0.113686	0.24117	agt-1
WBGene00000094	187.217	0.133093	0.124246	1.0712	0.284078	0.457232	agt-2
WBGene00000095	374.395	0.118022	0.0808016	1.46064	0.144115	0.287473	aha-1
WBGene00000096	21.0962	-0.416684	0.344858	-1.20828	0.226941	0.394929	ahr-1
WBGene00000097	579.039	0.2775	0.12052	2.30253	0.0213055	0.0676553	aip-1
WBGene00000098	3113.36	0.141708	0.0666828	2.12511	0.0335774	0.0959911	air-1
WBGene00000099	831.965	0.298202	0.134388	2.21897	0.0264888	0.0799746	air-2
WBGene00000100	8046.11	0.222628	0.0518235	4.29589	1.73992e-05	0.00018064	ajm-1
WBGene00000101	3560.06	0.0811855	0.0972822	0.834536	0.403979	0.580833	aka-1
WBGene00000102	2710.6	0.270504	0.0465192	5.81489	6.06748e-09	1.57189e-07	akt-1
WBGene00000103	382.406	0.0823875	0.0905934	0.909421	0.363128	0.540304	akt-2
WBGene00000105	3755.51	0.0717058	0.152994	0.468685	0.639295	0.771222	alg-1
WBGene00000106	1080.56	-0.0569556	0.111969	-0.508672	0.610982	0.751854	alg-2
WBGene00000107	7069.41	-0.234378	0.0654323	-3.58199	0.000340984	0.00228933	alh-1
WBGene00000108	0.642167	1.47372	1.71821	0.857706	0.391055	NA	alh-2
WBGene00000109	2982.15	-0.322706	0.106516	-3.02967	0.00244824	0.0118122	alh-3
WBGene00000110	5833.11	0.220686	0.187162	1.17912	0.238351	0.408152	alh-4
WBGene00000111	298.418	-0.0463276	0.118018	-0.392549	0.694653	0.811274	alh-5
WBGene00000112	2516.95	-0.140576	0.06615	-2.12511	0.0335778	0.0959911	alh-6
WBGene00000113	1139.85	0.0728046	0.0800438	0.90956	0.363055	0.540291	alh-7
WBGene00000114	8628.74	-0.371939	0.0831964	-4.47061	7.79962e-06	8.99301e-05	alh-8
WBGene00000115	3802.48	0.10633	0.147033	0.723173	0.469574	0.637717	alh-9
WBGene00000116	497.643	-0.387069	0.0911006	-4.2488	2.14918e-05	0.000217578	alh-10
WBGene00000117	1206.5	-0.203103	0.0759284	-2.67492	0.00747463	0.0292876	alh-11
WBGene00000118	3986.49	0.280739	0.121207	2.31619	0.0205481	0.0657759	alh-12
WBGene00000120	402.826	0.107579	0.163498	0.657987	0.510547	0.672188	aly-1
WBGene00000121	2358.17	0.0647144	0.125219	0.516809	0.60529	0.747218	aly-2
WBGene00000122	3279.5	-0.00306892	0.064228	-0.0477817	0.96189	0.978	aly-3
WBGene00000123	4867.86	-0.160239	0.0759796	-2.10898	0.0349466	0.0988949	ama-1
WBGene00000133	299.726	2.06495	0.317464	6.50451	7.7945e-11	2.87707e-09	amt-1
WBGene00000134	19.3266	0.418587	0.354232	1.18167	0.237335	0.407035	amt-2
WBGene00000135	70.1775	0.023006	0.20276	0.113464	0.909663	0.94784	amt-3
WBGene00000136	493.079	-0.869019	0.181058	-4.79967	1.58924e-06	2.24513e-05	amt-4
WBGene00000137	180.73	0.0987811	0.127617	0.774046	0.438903	0.613254	amx-1
WBGene00000138	1639.76	0.08071	0.165487	0.487713	0.625753	0.761382	amx-2
WBGene00000139	291.459	0.0555444	0.166466	0.333667	0.738631	0.842105	amx-3
WBGene00000140	29084.5	0.0968018	0.0895142	1.08141	0.279514	0.453022	anc-1
WBGene00000142	1421.89	-0.0512798	0.0724938	-0.707369	0.479337	0.646661	aos-1
WBGene00000143	909.609	-0.198649	0.129646	-1.53224	0.125462	0.259092	apc-2
WBGene00000144	357.832	-0.0908389	0.136518	-0.6654	0.505795	0.668975	apc-10
WBGene00000145	304.691	0.0296699	0.122416	0.24237	0.808494	0.888246	apc-11
WBGene00000146	2610.55	0.370357	0.0914177	4.05126	5.09421e-05	0.000453774	ape-1
WBGene00000147	388.701	0.287118	0.135343	2.12141	0.033887	0.0966941	aph-1
WBGene00000148	806.964	-0.111063	0.0604546	-1.83713	0.0661909	0.1607	aph-2
WBGene00000149	10314.1	0.185002	0.0753844	2.45411	0.0141235	0.048796	apl-1
WBGene00000150	1893.39	-0.143694	0.118515	-1.21245	0.225341	0.393133	apm-1
WBGene00000151	869.004	0.163837	0.113118	1.44837	0.147512	0.292813	apn-1
WBGene00000155	4393.07	-0.244424	0.085865	-2.84661	0.00441873	0.0191985	app-1
WBGene00000156	1236.48	0.354613	0.0689978	5.13948	2.75494e-07	4.79285e-06	2019-04-01
WBGene00000157	441.53	-0.189415	0.161989	-1.16931	0.242281	0.41285	aps-2
WBGene00000158	2732.16	-0.0729636	0.0643982	-1.13301	0.257212	0.429422	apg-1
WBGene00000159	953.055	-0.13719	0.0828711	-1.65547	0.0978294	0.215612	aps-1
WBGene00000160	2595.44	-0.131216	0.118394	-1.1083	0.267733	0.440909	apb-1
WBGene00000161	1418.03	-0.167548	0.173947	-0.963214	0.33544	0.513204	apa-2
WBGene00000162	1275.61	0.116617	0.0616085	1.89287	0.0583749	0.145406	apd-3
WBGene00000163	1881.2	0.195657	0.0539198	3.62867	0.000284884	0.00196081	apb-3
WBGene00000164	320.891	0.0959359	0.116103	0.826297	0.408636	0.585407	apm-3
WBGene00000165	817.725	0.122964	0.0753836	1.63118	0.102853	0.223729	aps-3
WBGene00000166	54.0794	-0.187886	0.216824	-0.866538	0.386195	0.563914	apt-9
WBGene00000168	923.485	0.534314	0.175687	3.04129	0.00235566	0.0114516	apx-1
WBGene00000169	1159.25	-0.49499	0.113398	-4.36505	1.27092e-05	0.000137231	aqp-1
WBGene00000170	2035.19	0.286009	0.119417	2.39505	0.0166183	0.0553743	aqp-2
WBGene00000171	15.1549	0.00381357	0.364615	0.0104592	0.991655	0.995335	aqp-3
WBGene00000172	1387.63	0.0423622	0.111106	0.381277	0.702998	0.81808	aqp-4
WBGene00000173	7.56665	-0.209682	0.525989	-0.398644	0.690156	0.808209	aqp-5
WBGene00000174	23.0714	-0.121482	0.363073	-0.334594	0.737931	0.841754	aqp-6
WBGene00000175	3229.76	0.0190285	0.122247	0.155656	0.876304	0.927858	aqp-7
WBGene00000176	696.372	0.426472	0.190947	2.23346	0.0255187	0.0777492	aqp-8
WBGene00000177	160.721	0.336936	0.159775	2.10881	0.0349606	0.0988949	aqp-9
WBGene00000178	2339.9	-0.0455796	0.0930288	-0.489952	0.624168	0.760497	aqp-10
WBGene00000179	1530.43	0.0812403	0.0750392	1.08264	0.278969	0.452399	aqp-11
WBGene00000180	505.354	-0.0742143	0.101766	-0.729266	0.465839	0.634661	arc-1
WBGene00000181	3806.39	-0.2173	0.0641755	-3.38603	0.000709115	0.00422985	ard-1
WBGene00000182	9709.27	-0.187418	0.0902029	-2.07774	0.0377334	0.104872	arf-1.2
WBGene00000183	10423.7	-0.243096	0.123606	-1.9667	0.0492183	0.127926	arf-3
WBGene00000184	696.556	0.0883132	0.0739578	1.1941	0.232438	0.401241	arf-6
WBGene00000185	0.490895	-0.158463	2.19093	-0.0723268	0.942342	NA	arg-1
WBGene00000186	838.586	0.217474	0.0726565	2.99319	0.0027608	0.01303	ark-1
WBGene00000187	900.943	-0.0516563	0.102748	-0.502747	0.615142	0.755061	arl-1
WBGene00000188	66.7719	0.137505	0.234291	0.586898	0.557272	0.711092	arl-3
WBGene00000189	202.035	-0.0366974	0.11797	-0.311074	0.755744	0.85339	arl-5
WBGene00000190	119.272	-1.24503	0.136889	-9.09521	9.44016e-20	1.02941e-17	arf-1.1
WBGene00000191	66.1477	-0.226673	0.385667	-0.587743	0.556705	0.710586	arl-7
WBGene00000192	1852.83	0.25468	0.0671608	3.79209	0.000149384	0.00113545	arl-8
WBGene00000193	8.26371	0.00925991	0.493074	0.01878	0.985017	0.991255	arl-6
WBGene00000195	264.159	-0.0895609	0.13609	-0.658102	0.510473	0.672188	arr-1
WBGene00000196	734.584	-0.435929	0.0623636	-6.99012	2.74649e-12	1.25198e-10	aars-1
WBGene00000197	6853	-0.315846	0.0670599	-4.70991	2.47824e-06	3.32371e-05	aars-2
WBGene00000198	4659.07	-0.333147	0.113871	-2.92566	0.00343728	0.0155878	art-1
WBGene00000199	1990.9	0.0724626	0.049262	1.47096	0.141301	0.28335	arx-1
WBGene00000200	2127.42	0.0668315	0.0507416	1.3171	0.187807	0.34714	arx-2
WBGene00000201	1586.06	0.0259005	0.0527068	0.491408	0.623138	0.76014	arx-3
WBGene00000202	688.738	-0.0420906	0.0968917	-0.434409	0.663992	0.789137	exos-4.2
WBGene00000203	873.516	0.0646411	0.0790722	0.817495	0.413646	0.589952	arx-5
WBGene00000204	1002.77	0.0240667	0.0656328	0.366687	0.713853	0.82553	arx-6
WBGene00000205	493.319	0.154287	0.101829	1.51515	0.129734	0.265743	arx-7
WBGene00000206	4739.33	-0.379386	0.0771186	-4.91951	8.67623e-07	1.31714e-05	asb-1
WBGene00000207	9168.14	-0.26957	0.0966314	-2.78968	0.00527609	0.0221896	asb-2
WBGene00000208	897.616	0.142632	0.0561757	2.53903	0.011116	0.0403525	asc-1
WBGene00000209	3320.04	-0.223486	0.0598559	-3.73372	0.000188669	0.00138668	asg-1
WBGene00000210	4395.93	-0.212995	0.0787572	-2.70445	0.00684169	0.0272687	asg-2
WBGene00000211	243.327	0.14443	0.114458	1.26186	0.207	0.372354	asm-1
WBGene00000212	380.91	0.350038	0.14081	2.48589	0.0129228	0.045438	asm-2
WBGene00000213	19.723	0.125135	0.392587	0.318744	0.749921	0.849804	asm-3
WBGene00000214	70431.2	-0.0494276	0.107105	-0.461485	0.64445	0.775199	asp-1
WBGene00000215	15571.4	0.0993565	0.0842321	1.17956	0.238177	0.407898	asp-2
WBGene00000216	41832.7	0.112274	0.0619375	1.8127	0.0698776	0.167361	asp-3
WBGene00000217	12072.3	0.328512	0.0793005	4.14262	3.43359e-05	0.000322738	asp-4
WBGene00000218	24384.8	0.292523	0.0730278	4.00564	6.1851e-05	0.000534397	asp-5
WBGene00000219	34115.2	-0.0268987	0.0865555	-0.310768	0.755977	0.853519	asp-6
WBGene00000220	171.081	-0.445536	0.453698	-0.982009	0.326095	0.503151	atf-2
WBGene00000221	2513.05	0.153237	0.101636	1.50771	0.131629	0.268834	atf-5
WBGene00000222	332.456	0.413371	0.11099	3.72441	0.000195774	0.00143008	atf-6
WBGene00000223	4683.2	0.288465	0.0851905	3.38612	0.00070889	0.00422985	atf-7
WBGene00000224	1959.34	0.0580928	0.0826248	0.703091	0.481999	0.649202	atgp-1
WBGene00000225	708.152	0.109254	0.0959127	1.13909	0.254664	0.42614	atgp-2
WBGene00000226	2004.51	-0.183548	0.0731065	-2.5107	0.0120492	0.0429243	atl-1
WBGene00000227	1114.77	-0.160641	0.062285	-2.57913	0.00990508	0.0367425	atm-1
WBGene00000228	10570.7	0.134654	0.0521625	2.58143	0.00983906	0.0365601	atn-1
WBGene00000229	57128.8	-0.438717	0.0958673	-4.5763	4.73271e-06	5.89698e-05	atp-2
WBGene00000230	15223.2	-0.124502	0.0614592	-2.02576	0.0427893	0.115219	atp-3
WBGene00000231	5677.59	-0.105717	0.0754934	-1.40035	0.161409	0.312775	atx-2
WBGene00000232	223.856	-0.0758447	0.119385	-0.635295	0.525236	0.684345	avr-14
WBGene00000233	397.86	0.39114	0.210182	1.86095	0.0627507	0.154074	avr-15
WBGene00000235	2056.91	-0.301774	0.0747621	-4.03646	5.42641e-05	0.000478258	baf-1
WBGene00000236	830.678	-0.50898	0.110653	-4.59978	4.22944e-06	5.35387e-05	bag-1
WBGene00000237	980.387	0.255461	0.0853986	2.9914	0.00277703	0.0130918	bam-2
WBGene00000238	638.435	0.454243	0.0729225	6.22913	4.69047e-10	1.49915e-08	bar-1
WBGene00000239	1120.47	-0.022316	0.14974	-0.149032	0.881529	0.931407	bas-1
WBGene00000240	1573.69	-0.111693	0.115461	-0.96737	0.333359	0.510863	pah-1
WBGene00000241	16.2503	-0.527603	0.366261	-1.44051	0.149722	0.296003	bbs-1
WBGene00000242	17.8432	-0.343481	0.361389	-0.950448	0.341885	0.520106	bbs-2
WBGene00000244	30.1153	0.135405	0.275784	0.490982	0.623439	0.760276	bbs-8
WBGene00000245	586.055	-0.27366	0.104695	-2.61387	0.00895227	0.0339454	bca-1
WBGene00000246	118.662	-0.143759	0.214721	-0.669513	0.503168	0.66657	bcc-1
WBGene00000247	625.328	0.200588	0.113649	1.76498	0.0775668	0.181224	bec-1
WBGene00000248	1578.29	-0.236007	0.0755092	-3.12554	0.00177479	0.00910817	ben-1
WBGene00000249	531.413	0.13318	0.10934	1.21804	0.223207	0.390459	bir-1
WBGene00000250	332.89	0.0133518	0.108116	0.123495	0.901715	0.943053	bir-2
WBGene00000251	4746.39	-1.03161	0.917631	-1.12421	0.260924	0.433462	bli-1
WBGene00000252	5198.39	-1.14396	0.820038	-1.39501	0.163012	0.314961	bli-2
WBGene00000253	1827.84	-0.0630623	0.0718894	-0.877213	0.380371	0.55734	bli-3
WBGene00000254	8560.08	0.0631178	0.0972151	0.649259	0.516171	0.676331	bli-4
WBGene00000255	206.933	0.00222819	0.16219	0.0137382	0.989039	0.993924	bli-5
WBGene00000256	33445.7	-0.162127	0.280435	-0.578126	0.563179	0.715075	bli-6
WBGene00000257	2349.47	-0.0398142	0.0446007	-0.892683	0.372027	0.549721	bmk-1
WBGene00000259	777.62	-0.19522	0.0678094	-2.87896	0.00398994	0.0176386	bpl-1
WBGene00000262	72.0409	0.430056	0.193013	2.22812	0.0258723	0.0786111	bra-1
WBGene00000263	7074.32	-0.0152124	0.116932	-0.130096	0.896491	0.940104	F23H11.5
WBGene00000264	468.942	-0.0228967	0.116595	-0.196378	0.844314	0.909224	brc-1
WBGene00000265	611.938	-0.0566047	0.0933022	-0.606682	0.544062	0.700612	brd-1
WBGene00000266	1987.93	-0.224994	0.130793	-1.72023	0.08539	0.194784	bre-1
WBGene00000267	201.913	0.380788	0.114966	3.31219	0.000925694	0.00530544	bre-2
WBGene00000268	3004.27	0.257696	0.107753	2.39156	0.0167771	0.0558256	bre-3
WBGene00000269	423.055	-0.238885	0.117972	-2.02493	0.0428745	0.115355	bre-4
WBGene00000270	252.24	-0.0867846	0.110634	-0.784426	0.43279	0.6078	bre-5
WBGene00000271	1175.65	0.0985031	0.106346	0.926251	0.354316	0.532317	brf-1
WBGene00000272	6.25207	-0.353308	0.607805	-0.581285	0.561048	0.713382	bro-1
WBGene00000273	7565.62	0.323261	0.151559	2.13291	0.032932	0.0944377	brp-1
WBGene00000274	1664.6	-0.0923463	0.0542981	-1.70073	0.0889939	0.200892	btf-1
WBGene00000275	3172.6	-0.0378862	0.0588477	-0.6438	0.519705	0.679633	bub-1
WBGene00000276	3138.52	-0.06803	0.055041	-1.23599	0.216463	0.383017	byn-1
WBGene00000277	2080.76	0.441115	0.0854537	5.16203	2.44283e-07	4.31739e-06	cab-1
WBGene00000279	55.5971	0.134086	0.249054	0.538381	0.590314	0.736258	cah-1
WBGene00000280	55.1525	-0.0824557	0.199287	-0.413754	0.679055	0.800129	cah-2
WBGene00000281	999.976	-0.0450554	0.136433	-0.330239	0.741219	0.843692	cah-3
WBGene00000282	3582.24	-0.0102744	0.0846928	-0.121314	0.903442	0.944307	cah-4
WBGene00000283	977.026	0.00729833	0.0825557	0.088405	0.929555	0.958688	cah-5
WBGene00000284	154.869	-0.0769562	0.120255	-0.639944	0.522209	0.681786	cah-6
WBGene00000285	276.193	0.294412	0.129573	2.27216	0.0230767	0.0717635	cal-1
WBGene00000286	216.39	0.519187	0.131178	3.95789	7.56163e-05	0.000638776	cal-2
WBGene00000287	29.3976	0.294305	0.322685	0.912051	0.361742	0.538894	cal-3
WBGene00000288	143.356	0.152114	0.123278	1.23391	0.217238	0.383906	cal-4
WBGene00000289	1125.8	0.227975	0.0947295	2.40658	0.0161025	0.0540551	cam-1
WBGene00000292	2377.97	0.133889	0.0445185	3.0075	0.0026341	0.012542	cap-1
WBGene00000293	3241.54	0.146901	0.046052	3.18989	0.00142325	0.00755262	cap-2
WBGene00000294	3013.53	0.0399729	0.0806737	0.495489	0.620255	0.758231	cas-1
WBGene00000295	73.8111	0.0129315	0.178354	0.0725046	0.9422	0.966803	cat-1
WBGene00000296	50.3308	0.119322	0.22299	0.535098	0.592582	0.738194	cat-2
WBGene00000298	1346.85	0.225156	0.145706	1.54527	0.12228	0.254189	cat-4
WBGene00000301	25.6469	2.98177	0.502256	5.93675	2.90721e-09	8.03044e-08	cav-1
WBGene00000302	130.928	0.352954	0.175451	2.0117	0.0442517	0.118317	cav-2
WBGene00000366	4890.49	0.0883946	0.0680086	1.29976	0.193685	0.355498	cbp-1
WBGene00000367	493.317	0.183902	0.145629	1.26281	0.206657	0.371977	cca-1
WBGene00000368	486.544	-0.00275826	0.106107	-0.0259951	0.979261	0.988265	ccb-1
WBGene00000369	1272.16	0.0940449	0.0831401	1.13116	0.257987	0.430211	ccf-1
WBGene00000370	2711.45	0.244386	0.0764862	3.19516	0.00139752	0.00743976	ccg-1
WBGene00000371	9265.88	-0.148851	0.113831	-1.30765	0.190992	0.351695	cco-1
WBGene00000372	0.811187	1.12095	1.87459	0.597973	0.549858	NA	cyp-13A7
WBGene00000373	348.028	-2.04324	0.251099	-8.13716	4.04667e-16	2.93542e-14	cyp-14A5
WBGene00000374	352.39	-0.5913	0.131362	-4.5013	6.75377e-06	7.91291e-05	cyp-31A1
WBGene00000375	522.738	0.0315086	0.0941707	0.33459	0.737934	0.841754	cyp-44A1
WBGene00000376	5524.6	0.0557986	0.0500792	1.11421	0.26519	0.438063	ccr-4
WBGene00000377	8482.88	-0.239081	0.0798068	-2.99574	0.00273776	0.0129432	cct-1
WBGene00000378	7564.01	-0.34798	0.0847264	-4.1071	4.00661e-05	0.000368909	cct-2
WBGene00000379	8544.21	-0.266565	0.068973	-3.86478	0.000111191	0.000887189	cct-4
WBGene00000380	15905.1	-0.455872	0.0897226	-5.08091	3.75638e-07	6.33685e-06	cct-5
WBGene00000381	8571.75	-0.321444	0.0784638	-4.09672	4.19042e-05	0.000383085	cct-6
WBGene00000382	1152.86	0.174353	0.0818087	2.13122	0.0330708	0.0947561	cdc-6
WBGene00000383	1820.19	0.269333	0.0663504	4.05926	4.92293e-05	0.000441868	cdc-14
WBGene00000386	2313.45	0.139707	0.0806594	1.73207	0.0832616	0.191236	cdc-25.1
WBGene00000387	209.728	0.760161	0.122797	6.19038	6.00177e-10	1.87868e-08	cdc-25.2
WBGene00000388	105.202	1.48344	0.358469	4.13828	3.49924e-05	0.000327985	cdc-25.3
WBGene00000389	143.454	-0.417717	0.211686	-1.97328	0.0484632	0.126397	cdc-25.4
WBGene00000390	4139.14	0.123344	0.0645811	1.9099	0.0561458	0.141202	cdc-42
WBGene00000391	439.826	0.472683	0.13458	3.51227	0.000444291	0.00284989	cdd-1
WBGene00000392	582.003	-0.447029	0.133522	-3.34799	0.000813986	0.00476009	cdd-2
WBGene00000393	1023.13	0.303212	0.067456	4.49497	6.958e-06	8.118e-05	cdf-1
WBGene00000395	249.111	0.664055	0.210762	3.15074	0.00162857	0.00844578	cdh-3
WBGene00000396	857.535	0.101706	0.1824	0.557596	0.57712	0.726473	cdh-4
WBGene00000397	488.158	-0.332405	0.522799	-0.635818	0.524895	0.684114	cdh-5
WBGene00000399	205.523	-1.22157	1.01243	-1.20657	0.227599	0.395467	cdh-7
WBGene00000401	207.739	-0.101603	0.279612	-0.363372	0.716327	0.826915	cdh-9
WBGene00000402	532.247	-1.0315	0.917715	-1.12399	0.261016	0.433529	cdh-10
WBGene00000403	1813.03	0.213551	0.0660505	3.23315	0.00122432	0.00668847	casy-1
WBGene00000405	2028.49	0.0877234	0.0942642	0.930611	0.352055	0.529685	cdk-1
WBGene00000406	72.4282	0.366796	0.187711	1.95405	0.0506951	0.130685	cdk-4
WBGene00000407	653.833	0.160924	0.102708	1.5668	0.117161	0.246031	cdk-5
WBGene00000408	850.197	0.0143198	0.0849431	0.168582	0.866126	0.922448	cdk-7
WBGene00000409	710.836	0.375346	0.0722876	5.19239	2.07611e-07	3.76089e-06	cdk-8
WBGene00000410	694.251	0.0490405	0.0628132	0.780736	0.434958	0.609409	cdk-9
WBGene00000411	2001.02	0.39652	0.0729845	5.43293	5.5435e-08	1.15035e-06	cdl-1
WBGene00000412	52.6608	-0.116732	0.236789	-0.492979	0.622027	0.75934	cdr-1
WBGene00000413	558.766	0.460869	0.104079	4.42806	9.50842e-06	0.000106684	cdt-1
WBGene00000414	812.85	-0.0174993	0.0829319	-0.211008	0.832881	0.90291	cec-1
WBGene00000415	1678.88	0.585137	0.133885	4.37043	1.24e-05	0.000134689	ced-1
WBGene00000416	679.101	0.0186039	0.125324	0.148446	0.881991	0.93175	ced-2
WBGene00000417	1527.72	0.353447	0.160849	2.19738	0.0279933	0.0834298	ced-3
WBGene00000418	581.699	-0.0934349	0.0709993	-1.316	0.188175	0.347714	ced-4
WBGene00000419	1813.63	0.141167	0.104906	1.34565	0.178414	0.335366	ced-5
WBGene00000420	742.69	0.4424	0.114973	3.84786	0.000119156	0.000938179	ced-6
WBGene00000421	4656.16	0.149666	0.0809659	1.84851	0.0645292	0.157536	ced-7
WBGene00000422	20.0582	0.21474	0.451947	0.475143	0.634685	0.767659	ced-8
WBGene00000423	718.227	0.295398	0.136026	2.17163	0.0298832	0.0874841	ced-9
WBGene00000424	1096.54	-0.142956	0.0779384	-1.83422	0.0666214	0.161553	ced-10
WBGene00000425	232.939	-0.298771	0.268813	-1.11145	0.266377	0.439544	ced-11
WBGene00000426	1140.89	0.25122	0.104282	2.40905	0.0159943	0.0538545	ced-12
WBGene00000427	0.166681	0.498191	3.81693	0.130521	0.896154	NA	ced-13
WBGene00000428	10.7613	0.841926	0.47641	1.76723	0.07719	0.180521	ceh-1
WBGene00000429	15.8835	-0.030696	0.394349	-0.0778396	0.937956	0.96455	ceh-2
WBGene00000430	48.3568	0.045613	0.240464	0.189687	0.849554	0.912506	ceh-5
WBGene00000431	44.1652	0.242762	0.245852	0.987434	0.32343	0.500613	ceh-6
WBGene00000432	0.72755	1.9676	1.6174	1.21652	0.223788	NA	ceh-7
WBGene00000433	2.65266	-1.645	0.952162	-1.72765	0.0840518	NA	ceh-8
WBGene00000434	6.11312	-0.0958309	0.668892	-0.143268	0.886078	0.93422	ceh-9
WBGene00000435	9.39896	0.387552	0.473364	0.818719	0.412947	0.589359	ceh-10
WBGene00000436	3.76002	-1.994	0.906789	-2.19897	0.0278799	0.0832107	ceh-12
WBGene00000437	159.125	0.0343269	0.167111	0.205415	0.837248	0.905468	ceh-13
WBGene00000438	202.154	0.275338	0.132208	2.08262	0.0372863	0.103836	ceh-14
WBGene00000439	3.51092	0.584323	0.76513	0.763691	0.445052	NA	ceh-16
WBGene00000440	4.51004	0.30505	0.74919	0.407173	0.683881	0.803682	ceh-17
WBGene00000441	983.499	0.130914	0.0536061	2.44215	0.0146	0.0500382	ceh-18
WBGene00000442	21.7847	0.350754	0.356832	0.982967	0.325624	0.502783	ceh-19
WBGene00000443	403.481	0.0194761	0.099699	0.195349	0.84512	0.909593	ceh-20
WBGene00000444	87.5023	0.705321	0.204078	3.45613	0.000547987	0.00340072	ceh-21
WBGene00000445	34.4242	0.841527	0.258624	3.25387	0.00113845	0.00628238	ceh-22
WBGene00000446	25.777	0.108317	0.31391	0.345056	0.730052	0.83615	ceh-23
WBGene00000447	25.0617	-0.0808394	0.272744	-0.296393	0.76693	0.861008	ceh-24
WBGene00000448	115.09	0.0908902	0.147524	0.616105	0.537825	0.695452	pros-1
WBGene00000449	39.6801	0.304737	0.231719	1.31511	0.188472	0.348031	ceh-27
WBGene00000450	0	NA	NA	NA	NA	NA	ceh-28
WBGene00000451	18.2073	0.366416	0.329464	1.11216	0.26607	0.439168	ceh-30
WBGene00000452	18.0847	0.0822646	0.352929	0.233091	0.815691	0.891925	ceh-31
WBGene00000453	224.217	0.202209	0.115001	1.75832	0.0786925	0.183495	ceh-32
WBGene00000454	17.2941	0.228405	0.377094	0.605698	0.544715	0.701215	ceh-33
WBGene00000455	70.3247	-0.0122425	0.174978	-0.0699658	0.944221	0.968128	ceh-34
WBGene00000457	2.03144	2.1835	1.33813	1.63175	0.102732	NA	ceh-36
WBGene00000458	279.233	0.167802	0.135645	1.23707	0.21606	0.382694	ceh-37
WBGene00000459	1752.93	0.255901	0.0927572	2.75883	0.00580092	0.023891	ceh-38
WBGene00000460	101.99	0.761052	0.209839	3.62683	0.000286924	0.00197079	ceh-39
WBGene00000461	8.37154	1.3967	0.602717	2.31734	0.0204853	0.0656247	ceh-40
WBGene00000462	63.6065	0.00921078	0.210969	0.0436593	0.965176	0.980276	ceh-41
WBGene00000463	53.0899	0.56071	0.231105	2.42622	0.015257	0.0518218	ceh-43
WBGene00000464	1971.43	0.0285889	0.0560302	0.510242	0.609882	0.750943	ceh-44
WBGene00000465	7667.44	0.696287	0.258895	2.68946	0.00715678	0.0282479	cpg-1
WBGene00000466	1034.44	-0.262353	0.0653403	-4.01518	5.93993e-05	0.00051535	cel-1
WBGene00000467	846.947	-0.108275	0.113293	-0.955708	0.33922	0.517336	cep-1
WBGene00000468	0.841305	0.821272	1.7506	0.469137	0.638971	NA	ces-1
WBGene00000469	1.45556	-0.533152	1.2928	-0.4124	0.680046	NA	ces-2
WBGene00000472	9445.31	0.13102	0.0596346	2.19704	0.0280175	0.0834722	cey-1
WBGene00000473	18552.9	0.0895198	0.17089	0.523846	0.600386	0.744027	cey-2
WBGene00000474	8304.71	0.174144	0.139527	1.24811	0.211992	0.377844	cey-3
WBGene00000475	11016	-0.0598352	0.0737242	-0.811609	0.417016	0.593137	cey-4
WBGene00000476	116.499	0.213725	0.152915	1.39767	0.162211	0.31385	cfi-1
WBGene00000477	206.732	0.545311	0.112043	4.86699	1.13313e-06	1.66712e-05	cft-1
WBGene00000478	61.7476	0.544721	0.236819	2.30016	0.0214394	0.0679125	cfz-2
WBGene00000479	29234.1	0.104807	0.135107	0.775735	0.437906	0.612202	cgh-1
WBGene00000480	2780.68	0.144285	0.0822189	1.75489	0.0792776	0.184627	cgp-1
WBGene00000481	113.411	0.0652819	0.160785	0.40602	0.684728	0.804276	cha-1
WBGene00000482	1086.21	-0.00975371	0.143757	-0.0678485	0.945906	0.968798	chd-3
WBGene00000483	0.518471	0.264901	1.91532	0.138306	0.889998	NA	che-1
WBGene00000484	45.2365	0.0915875	0.254533	0.359825	0.718978	0.8287	che-2
WBGene00000485	119.518	-0.183121	0.183369	-0.998647	0.317966	0.494679	che-3
WBGene00000487	3.35718	-0.709051	0.762594	-0.929789	0.352481	NA	che-6
WBGene00000488	44.78	-0.0732997	0.229758	-0.31903	0.749704	0.849674	che-7
WBGene00000490	52.8786	0.112609	0.225118	0.500225	0.616917	0.75618	che-11
WBGene00000491	60.803	0.376492	0.239873	1.56955	0.116521	0.245149	che-12
WBGene00000492	55.2009	0.235612	0.206292	1.14213	0.253401	0.424988	che-13
WBGene00000493	297.544	-0.269554	0.521332	-0.517048	0.605123	0.747067	che-14
WBGene00000496	2454.66	0.261386	0.206809	1.2639	0.206265	0.371482	chs-1
WBGene00000497	1124.3	-0.193793	0.305662	-0.63401	0.526074	0.685169	chs-2
WBGene00000498	774.882	0.341622	0.0906864	3.76707	0.000165175	0.00123967	chk-1
WBGene00000499	312.109	-0.816215	0.11133	-7.33149	2.27613e-13	1.20555e-11	chk-2
WBGene00000500	769.235	0.148955	0.0934232	1.59441	0.110845	0.236821	chn-1
WBGene00000501	101.553	0.234345	0.148278	1.58045	0.114005	0.241684	cho-1
WBGene00000502	1386.33	-0.588187	0.092124	-6.38473	1.717e-10	6.03084e-09	chp-1
WBGene00000503	80.1192	-0.04948	0.508308	-0.0973424	0.922454	0.955057	cht-1
WBGene00000506	282.881	0.179711	0.0924287	1.94432	0.0518568	0.132839	cic-1
WBGene00000507	685.264	-0.086159	0.0862581	-0.998851	0.317867	0.494571	cit-1.1
WBGene00000508	1110.15	0.00595225	0.0884259	0.0673134	0.946332	0.968923	cit-1.2
WBGene00000509	1137.34	0.27825	0.136497	2.03851	0.0414994	0.112618	cka-1
WBGene00000510	253.655	0.0783353	0.112037	0.69919	0.484433	0.651482	cka-2
WBGene00000511	154.489	-0.157772	0.131573	-1.19912	0.230481	0.398854	ckb-1
WBGene00000512	2049.31	-0.960892	0.502001	-1.91413	0.055604	0.140136	ckb-2
WBGene00000513	3.20437	-1.36643	0.855024	-1.59812	0.110017	NA	ckb-3
WBGene00000514	345.704	0.0103999	0.165379	0.0628849	0.949858	0.971401	ckb-4
WBGene00000515	687.164	0.0333771	0.11956	0.279166	0.780118	0.869654	ckc-1
WBGene00000516	355.957	0.581223	0.108437	5.36	8.32222e-08	1.65888e-06	cki-1
WBGene00000517	882.195	0.308194	0.0910495	3.38491	0.000712026	0.00424417	cki-2
WBGene00000518	115.347	0.0333981	0.164948	0.202476	0.839544	0.906893	ckk-1
WBGene00000519	930.078	0.163679	0.0575438	2.84442	0.00444923	0.0193209	cku-70
WBGene00000520	840.236	0.47116	0.095632	4.9268	8.35862e-07	1.27823e-05	cku-80
WBGene00000521	17.4838	-0.195627	0.740229	-0.264279	0.791565	0.877273	cky-1
WBGene00000522	1527.03	1.28286	0.100672	12.743	3.41066e-37	1.53793e-34	clc-1
WBGene00000523	61.1817	0.0111757	0.252217	0.04431	0.964657	0.979988	clc-2
WBGene00000524	127.246	-0.166965	0.146435	-1.1402	0.254204	0.425688	clc-3
WBGene00000525	2.79818	-1.05125	0.948352	-1.10851	0.267643	NA	clc-4
WBGene00000526	63.7006	0.0297465	0.269068	0.110554	0.91197	0.949236	clc-5
WBGene00000527	1671.44	0.269514	0.108718	2.47903	0.013174	0.0461852	cle-1
WBGene00000528	2122.59	0.507929	0.130035	3.90609	9.38014e-05	0.000768656	clh-1
WBGene00000529	117.855	0.267071	0.138319	1.93083	0.0535043	0.136056	clh-2
WBGene00000530	678.376	0.292174	0.0946936	3.08547	0.0020323	0.0101761	clh-3
WBGene00000531	177.052	0.394359	0.12827	3.07444	0.00210901	0.0104711	clh-4
WBGene00000532	1825.01	-0.0768615	0.0497334	-1.54547	0.122233	0.254136	clh-5
WBGene00000533	914.4	-0.0769653	0.0800847	-0.961048	0.336528	0.514208	clh-6
WBGene00000534	3599.7	0.303155	0.0754318	4.01892	5.84644e-05	0.000508296	cpi-2
WBGene00000535	1806.46	-0.572503	0.117184	-4.8855	1.03169e-06	1.54236e-05	cpi-1
WBGene00000536	649.479	-0.183301	0.0768574	-2.38494	0.0170817	0.0566357	clk-1
WBGene00000537	677.535	0.16354	0.0976591	1.6746	0.094013	0.209302	clk-2
WBGene00000539	170.653	-0.233498	0.11584	-2.01569	0.0438321	0.117458	cln-3.1
WBGene00000540	266.655	0.0304054	0.105837	0.287284	0.773895	0.865683	cln-3.2
WBGene00000541	99.2776	-0.847487	0.205464	-4.12476	3.71126e-05	0.0003451	cln-3.3
WBGene00000542	7326.86	0.352867	0.109919	3.21025	0.00132619	0.00713287	clp-1
WBGene00000543	772.045	-0.0829657	0.0758708	-1.09351	0.274169	0.44784	clp-2
WBGene00000544	240.283	-0.306647	0.127014	-2.41427	0.0157667	0.0532385	clp-3
WBGene00000545	871.999	-0.0188721	0.0994564	-0.189753	0.849503	0.912506	clp-4
WBGene00000546	637.179	-0.274497	0.132302	-2.07477	0.0380077	0.105318	clp-6
WBGene00000547	1746.79	-0.130692	0.100215	-1.30411	0.192196	0.35315	clp-7
WBGene00000548	1971.94	0.0277291	0.0678642	0.408597	0.682835	0.803132	clr-1
WBGene00000549	1813.54	-0.377188	0.0532071	-7.08905	1.35039e-12	6.45555e-11	cls-2
WBGene00000550	6953.89	-0.609649	0.0603274	-10.1057	5.21368e-24	8.05417e-22	clu-1
WBGene00000551	4.05881	1.17057	1.0754	1.0885	0.276375	0.449921	clx-1
WBGene00000552	10303.3	-0.00236341	0.0864212	-0.0273475	0.978183	0.987594	cmd-1
WBGene00000553	135.346	0.0436765	0.173156	0.252238	0.800857	0.883398	cmk-1
WBGene00000554	1289.4	0.152729	0.0604954	2.52464	0.0115817	0.0416262	cnb-1
WBGene00000555	0.254358	-0.223135	3.5297	-0.0632163	0.949594	NA	cnc-1
WBGene00000556	148.182	-0.774289	0.456963	-1.69442	0.0901851	0.202822	cnc-2
WBGene00000557	200.042	-1.00087	0.785838	-1.27363	0.202795	0.367218	cnc-3
WBGene00000558	726.973	-0.7729	0.517769	-1.49275	0.135503	0.274663	cnc-4
WBGene00000559	0.16937	-1.65532	3.80387	-0.435169	0.66344	NA	cnc-5
WBGene00000560	0.385455	1.76168	2.19679	0.801935	0.422591	NA	cnc-6
WBGene00000561	1.65627	1.1367	1.27025	0.894861	0.370862	NA	cnd-1
WBGene00000562	45.7301	-0.585211	0.227917	-2.56765	0.0102391	0.0377607	cng-1
WBGene00000563	7.74098	0.0768238	0.532532	0.144261	0.885294	0.93388	cng-3
WBGene00000564	1061.99	0.222203	0.0992666	2.23845	0.0251919	0.07695	cnk-1
WBGene00000565	1457.4	0.0656829	0.079688	0.824251	0.409797	0.58657	cnt-1
WBGene00000566	1787.98	0.106039	0.0944351	1.12288	0.261488	0.434015	cnt-2
WBGene00000567	5319.99	-0.256308	0.0660011	-3.88339	0.00010301	0.000833471	cnx-1
WBGene00000583	80.1166	-0.45608	0.197919	-2.30437	0.0212017	0.0673512	cof-2
WBGene00000584	115.702	0.155493	0.194754	0.798409	0.424633	0.600439	cog-1
WBGene00000585	1323.69	-0.0619815	0.0792597	-0.782006	0.434211	0.608874	cogc-2
WBGene00000591	420.208	0.437355	0.138955	3.14747	0.00164691	0.00853059	coh-1
WBGene00000592	651.469	0.0942437	0.0669801	1.40704	0.159416	0.310132	coh-3
WBGene00000593	2.6575	1.31996	0.944003	1.39826	0.162035	NA	col-2
WBGene00000594	35240.4	0.0497776	0.173067	0.28762	0.773637	0.865596	col-3
WBGene00000596	10303.5	0.188913	0.422417	0.447219	0.654717	0.782471	col-7
WBGene00000597	5313.42	1.19647	0.585378	2.04392	0.0409615	0.111539	col-8
WBGene00000598	0.876542	1.02326	1.51758	0.674269	0.50014	NA	col-9
WBGene00000599	23644.6	-0.103652	0.171224	-0.605358	0.544941	0.701389	col-10
WBGene00000601	55209.8	0.0460008	0.173243	0.265528	0.790602	0.876672	col-12
WBGene00000602	28169.4	0.00887693	0.212793	0.0417163	0.966725	0.980953	col-13
WBGene00000603	29871.3	-0.2928	0.248531	-1.17812	0.238748	0.408583	col-14
WBGene00000606	10973.2	-0.690654	0.539559	-1.28003	0.200533	0.364574	col-17
WBGene00000608	31026.7	0.34799	0.31264	1.11307	0.265679	0.438696	col-19
WBGene00000609	31819.9	0.361508	0.315059	1.14743	0.251204	0.422574	col-20
WBGene00000610	343.002	0.178068	0.260353	0.683948	0.494008	0.65931	col-33
WBGene00000611	1599.86	0.151216	0.265093	0.570426	0.568389	0.719226	col-34
WBGene00000612	3.47006	0.189384	0.83466	0.2269	0.820502	NA	col-35
WBGene00000613	1.20486	0.204074	1.34912	0.151265	0.879767	NA	col-36
WBGene00000614	0.508979	2.29816	3.15503	0.728409	0.466363	NA	col-37
WBGene00000615	32559.9	-0.373325	0.351113	-1.06326	0.287663	0.461034	col-38
WBGene00000616	21508.5	0.346259	0.311523	1.1115	0.266351	0.439544	col-39
WBGene00000617	1.89959	0.273977	1.09385	0.250471	0.802223	NA	col-40
WBGene00000618	53.5129	-1.5599	0.555099	-2.81013	0.00495213	0.0210675	col-41
WBGene00000620	33.8819	-0.389306	0.295148	-1.31902	0.187163	0.346541	col-43
WBGene00000621	3.22351	-2.44565	1.07794	-2.26881	0.0232798	NA	col-44
WBGene00000622	5.12461	-0.672566	0.643173	-1.0457	0.2957	0.470121	col-45
WBGene00000623	77.8536	-0.714286	0.869113	-0.821856	0.411159	0.587783	col-46
WBGene00000624	24.2846	-0.989906	0.886049	-1.11721	0.263903	0.436888	col-47
WBGene00000625	10234.2	-0.546919	0.355605	-1.53799	0.12405	0.25694	col-48
WBGene00000626	21822.9	-0.347451	0.326496	-1.06418	0.287246	0.460588	col-49
WBGene00000627	0.675798	0.367601	1.73192	0.212251	0.831911	NA	col-50
WBGene00000628	1.90157	-0.697393	1.08311	-0.643882	0.519652	NA	col-51
WBGene00000629	1.8684	0.536716	1.19986	0.447315	0.654648	NA	col-52
WBGene00000630	43.2066	0.257416	0.248214	1.03708	0.2997	0.474763	col-53
WBGene00000631	184.01	-0.574327	0.243432	-2.35929	0.0183098	0.0598981	col-54
WBGene00000632	0.214634	0	3.81693	0	1	NA	col-55
WBGene00000633	7.38412	-0.226836	0.658131	-0.344667	0.730345	0.836263	col-56
WBGene00000634	1661.53	-0.254459	0.20431	-1.24545	0.212966	0.378838	col-58
WBGene00000636	18180.2	-0.0179801	0.103274	-0.174101	0.861786	0.919606	col-60
WBGene00000637	213.276	-0.0934164	0.154644	-0.604072	0.545796	0.701921	col-61
WBGene00000638	11309	0.222282	0.406008	0.547481	0.584048	0.732156	col-62
WBGene00000639	26797.9	-0.480198	0.472243	-1.01684	0.309228	0.485065	col-63
WBGene00000640	21.2362	-0.85513	0.336636	-2.54022	0.0110783	0.0402329	col-64
WBGene00000641	6772.85	0.412115	0.166497	2.47521	0.0133159	0.0465066	col-65
WBGene00000642	1.24966	1.88062	1.68136	1.11851	0.263348	NA	col-66
WBGene00000644	410.965	-0.488155	0.159032	-3.06953	0.00214394	0.0106141	col-68
WBGene00000645	200.824	-0.0181299	0.19405	-0.093429	0.925563	0.956513	col-69
WBGene00000646	616.301	0.265719	0.203218	1.30755	0.191025	0.351695	H17B01.2
WBGene00000647	39383.7	0.0482724	0.306338	0.157579	0.874789	0.926903	col-71
WBGene00000648	1.58575	0.774905	1.33861	0.578887	0.562665	NA	col-72
WBGene00000649	57255.4	-0.339776	0.401238	-0.846818	0.397097	0.574203	col-73
WBGene00000650	8.92156	-0.220748	0.462796	-0.476987	0.633371	0.766348	col-74
WBGene00000651	22.0015	0.260131	0.412815	0.630139	0.528604	0.687634	col-75
WBGene00000652	3027.02	0.902226	0.129347	6.97522	3.05395e-12	1.38457e-10	col-76
WBGene00000653	50893.8	0.0327936	0.217106	0.151049	0.879937	0.93017	col-77
WBGene00000654	0.442461	-0.109625	2.21889	-0.0494053	0.960596	NA	col-78
WBGene00000655	1367.27	-0.968488	0.68997	-1.40367	0.160418	0.31161	col-79
WBGene00000656	17944.6	0.627111	0.501824	1.24966	0.211423	0.377485	col-80
WBGene00000657	44309.5	0.470811	0.304212	1.54764	0.121709	0.253444	col-81
WBGene00000658	22.9112	-0.00126118	0.300809	-0.00419262	0.996655	0.998091	col-83
WBGene00000659	4.08143	-0.331836	0.937759	-0.35386	0.723443	0.831549	col-84
WBGene00000660	5.18438	0.574118	0.647048	0.887288	0.374924	0.552436	col-85
WBGene00000661	2.74165	1.69653	1.03028	1.64667	0.0996252	NA	col-86
WBGene00000662	9.74554	0.697946	0.455941	1.53078	0.125823	0.259582	col-87
WBGene00000663	23156.2	0.169591	0.155487	1.09071	0.275401	0.449193	col-88
WBGene00000664	977.248	-0.088461	0.204593	-0.432376	0.665468	0.790017	col-89
WBGene00000665	2922.56	-0.507588	0.164476	-3.08609	0.00202807	0.0101641	col-90
WBGene00000666	10900.4	0.0302786	0.17437	0.173646	0.862144	0.91987	col-91
WBGene00000667	34873.9	0.282891	0.197868	1.4297	0.152804	0.30021	col-92
WBGene00000668	41648.8	0.433737	0.242411	1.78926	0.0735725	0.174185	col-93
WBGene00000669	19077.1	0.279671	0.193669	1.44407	0.148721	0.294451	col-94
WBGene00000670	137.208	1.39923	0.686422	2.03844	0.0415061	0.112618	col-95
WBGene00000671	828.183	-0.439963	0.369782	-1.18979	0.23413	0.40316	col-96
WBGene00000672	26836.9	-0.433716	0.295801	-1.46624	0.142582	0.285118	col-97
WBGene00000673	1855.39	1.31332	0.547013	2.40089	0.0163552	0.0547054	col-98
WBGene00000674	332.807	0.0677998	0.256033	0.264809	0.791157	0.877043	col-99
WBGene00000675	1528.75	1.56598	0.659711	2.37374	0.017609	0.0579692	col-101
WBGene00000676	0.811361	-0.799818	1.62589	-0.491926	0.622772	NA	col-102
WBGene00000677	2180.77	1.12469	0.525504	2.14021	0.0323375	0.0930954	col-103
WBGene00000678	20547.9	-0.25898	0.263103	-0.984328	0.324954	0.50204	col-104
WBGene00000679	18.2451	-0.0643039	0.490003	-0.131232	0.895592	0.939575	col-105
WBGene00000680	22113.9	0.579158	0.25333	2.28618	0.0222437	0.0698372	col-106
WBGene00000681	11584.4	0.114614	0.203532	0.563125	0.57335	0.723474	col-107
WBGene00000682	2.4531	-1.06017	1.02691	-1.03238	0.301894	NA	col-108
WBGene00000683	11613.7	-0.653216	0.410842	-1.58994	0.111848	0.238383	col-109
WBGene00000684	1592.27	-1.00916	0.75661	-1.33379	0.182271	0.340082	col-110
WBGene00000685	2742.57	-0.0116642	0.316391	-0.0368665	0.970591	0.983213	col-111
WBGene00000687	3394.12	-0.109173	0.124965	-0.873628	0.382321	0.559628	col-113
WBGene00000688	23.4647	0.163116	0.307102	0.531146	0.595318	0.739945	col-114
WBGene00000689	1707.43	-0.108952	0.217645	-0.500596	0.616656	0.75611	col-115
WBGene00000690	4.61933	1.10321	0.826556	1.33471	0.181971	0.339674	col-116
WBGene00000691	30922	0.00302218	0.163391	0.0184966	0.985243	0.991385	col-117
WBGene00000692	3085.62	0.0681026	0.145796	0.467109	0.640422	0.772135	col-118
WBGene00000693	18474.7	-0.0616771	0.510056	-0.120922	0.903753	0.944336	col-119
WBGene00000694	14639.6	-0.162127	0.151993	-1.06667	0.286119	0.459267	col-120
WBGene00000695	1.84779	-1.50476	1.33814	-1.12452	0.260793	NA	col-121
WBGene00000696	36720.6	0.57355	0.273831	2.09454	0.0362119	0.101591	col-122
WBGene00000697	23.0985	-1.99961	0.524072	-3.81553	0.00013589	0.00104575	col-123
WBGene00000698	60146.7	0.513598	0.294402	1.74455	0.0810635	0.18753	col-124
WBGene00000699	34300.9	0.107199	0.193743	0.553306	0.580054	0.728462	col-125
WBGene00000700	9290.52	-0.398259	0.300183	-1.32672	0.184601	0.343277	col-126
WBGene00000702	106.878	-0.585268	1.23499	-0.473905	0.635568	0.76817	col-128
WBGene00000703	57640	0.636818	0.292979	2.1736	0.0297353	0.0871582	col-129
WBGene00000704	9213.44	-0.140225	0.222777	-0.629438	0.529062	0.688041	col-130
WBGene00000705	257.643	-0.042841	0.363658	-0.117806	0.906222	0.945731	col-131
WBGene00000706	2.16204	0.528794	1.01687	0.520023	0.603047	NA	col-132
WBGene00000707	35362.6	0.0343235	0.157797	0.217517	0.827806	0.898976	col-133
WBGene00000708	68.3763	-0.190785	0.532013	-0.35861	0.719887	0.829518	col-135
WBGene00000709	0.164469	0.498191	3.81693	0.130521	0.896154	NA	col-136
WBGene00000710	6733.16	-0.290779	0.240253	-1.2103	0.226163	0.394037	col-137
WBGene00000711	39740.8	-0.189132	0.324814	-0.582277	0.56038	0.712849	col-138
WBGene00000712	46398.5	0.623538	0.304627	2.04689	0.0406689	0.110975	col-139
WBGene00000713	34261.6	0.46163	0.285611	1.61629	0.106032	0.228853	col-140
WBGene00000714	186.787	0.313764	0.254404	1.23333	0.217453	0.384116	col-141
WBGene00000715	3948.63	0.978799	0.538614	1.81726	0.069178	0.166201	col-142
WBGene00000716	1421.98	1.9596	0.682621	2.8707	0.00409562	0.0179914	col-143
WBGene00000717	25398.1	0.0805123	0.165645	0.486053	0.62693	0.762202	col-144
WBGene00000718	16027.9	-0.336997	0.185576	-1.81596	0.0693768	0.166472	col-145
WBGene00000719	10701.7	0.174354	0.329756	0.528735	0.596989	0.741415	col-146
WBGene00000720	8458.81	0.521086	0.437801	1.19024	0.233954	0.403066	col-147
WBGene00000721	29.298	0.452354	0.320255	1.41248	0.157808	0.30763	col-148
WBGene00000722	3493.12	-0.535417	0.343117	-1.56045	0.118654	0.248478	col-149
WBGene00000723	2397.24	-0.412557	0.207732	-1.986	0.0470332	0.123673	col-150
WBGene00000724	5.41673	0.187214	0.676355	0.276798	0.781935	0.870901	col-151
WBGene00000725	1096.35	0.631823	0.139136	4.54106	5.59728e-06	6.72318e-05	col-152
WBGene00000726	282.229	0.165117	0.136226	1.21208	0.22548	0.393176	col-153
WBGene00000727	13330.5	-0.5835	0.216865	-2.69061	0.00713208	0.028157	col-154
WBGene00000728	17365.1	-0.696436	0.235208	-2.96094	0.00306704	0.0141786	col-155
WBGene00000729	6841.34	-0.226088	0.217817	-1.03797	0.299283	0.474203	col-156
WBGene00000730	9250.59	-0.539028	0.281466	-1.91507	0.055483	0.139894	col-157
WBGene00000731	7.02662	0.243173	0.744044	0.326825	0.7438	0.84528	col-158
WBGene00000732	29564.4	0.0900712	0.200889	0.448363	0.653892	0.781821	col-159
WBGene00000733	30027.9	0.36211	0.286286	1.26485	0.205925	0.37118	col-160
WBGene00000734	36879.5	2.64823e-05	0.156408	0.000169315	0.999865	0.999985	col-161
WBGene00000735	21939.3	-0.00607099	0.149982	-0.0404782	0.967712	0.981445	col-162
WBGene00000736	3.15007	-0.471779	0.853917	-0.552489	0.580614	NA	col-163
WBGene00000737	0.975771	-2.48144	1.49716	-1.65744	0.0974311	NA	col-164
WBGene00000738	0.504721	1.16758	1.9295	0.605123	0.545097	NA	col-165
WBGene00000739	8774.14	-0.135937	0.168286	-0.807772	0.419222	0.595411	col-166
WBGene00000740	26406.4	-0.076116	0.14872	-0.511807	0.608786	0.750036	col-167
WBGene00000741	11791.7	-0.105704	0.174791	-0.604746	0.545348	0.701672	col-168
WBGene00000742	3403.33	-0.284791	0.190912	-1.49174	0.135767	0.275043	col-169
WBGene00000743	6259.06	-0.332092	0.157848	-2.10388	0.0353891	0.0998701	col-170
WBGene00000744	1.54136	-0.273364	1.13815	-0.240182	0.810189	NA	col-171
WBGene00000745	306.034	-0.000549759	0.315444	-0.00174281	0.998609	0.999508	col-172
WBGene00000746	1577.22	-0.370508	0.430942	-0.859761	0.389921	0.567365	col-173
WBGene00000747	794.219	-0.455399	0.240837	-1.8909	0.0586377	0.145929	col-174
WBGene00000748	25609.5	-0.110903	0.294925	-0.37604	0.706887	0.820546	col-175
WBGene00000749	311.905	-1.44711	0.973374	-1.48669	0.137096	0.277182	col-176
WBGene00000750	63.605	0.450912	0.221371	2.03691	0.0416595	0.112979	col-177
WBGene00000751	29426	0.312701	0.291661	1.07214	0.283658	0.456898	col-178
WBGene00000752	5404.45	0.378872	0.428164	0.884875	0.376224	0.553715	col-179
WBGene00000753	12428.2	-0.398604	0.172389	-2.31223	0.0207648	0.0662915	col-180
WBGene00000754	45370.3	0.554527	0.269412	2.05829	0.0395627	0.108474	col-181
WBGene00000755	1522.53	-0.368936	0.417999	-0.882625	0.377439	0.554966	col-182
WBGene00000756	2.73734	0.871875	0.837036	1.04162	0.297587	NA	col-183
WBGene00000757	25913.4	0.541245	0.266874	2.02809	0.0425506	0.114743	col-184
WBGene00000758	0.377691	-2.34755	2.57931	-0.910148	0.362744	NA	col-185
WBGene00000759	360.159	0.215531	0.124152	1.73603	0.082559	0.190067	col-186
WBGene00000760	14.9084	-0.194844	0.410682	-0.474441	0.635185	0.767922	col-187
WBGene00000761	1314.24	-0.00644073	0.0670377	-0.0960762	0.92346	0.955615	coq-1
WBGene00000762	578.856	-0.193544	0.0670291	-2.88746	0.00388367	0.0172465	coq-2
WBGene00000763	511.82	-0.204106	0.110763	-1.84272	0.0653696	0.15903	coq-3
WBGene00000764	273.177	-0.152344	0.121765	-1.25114	0.210884	0.377003	coq-4
WBGene00000765	1012.3	-0.418085	0.0816246	-5.12205	3.02228e-07	5.19296e-06	coq-5
WBGene00000766	862.387	0.0961716	0.0712973	1.34888	0.177375	0.334236	coq-6
WBGene00000767	1823.47	-0.434365	0.0555072	-7.82538	5.06118e-15	3.28563e-13	coq-8
WBGene00000768	1098.32	-0.109283	0.0710145	-1.53888	0.123835	0.256698	cor-1
WBGene00000770	847.3	0.0545898	0.0685799	0.796003	0.426031	0.601607	cpb-1
WBGene00000771	637.218	-0.34822	0.112201	-3.10354	0.0019122	0.00970881	cpb-2
WBGene00000772	3241.99	0.354506	0.0785256	4.51453	6.34573e-06	7.49272e-05	cpb-3
WBGene00000773	1062.8	-0.0979244	0.090074	-1.08716	0.276968	0.450222	cpf-1
WBGene00000774	834.804	0.133692	0.0687715	1.944	0.0518954	0.132897	cpf-2
WBGene00000775	262.035	-0.333103	0.165757	-2.00959	0.0444744	0.118722	cpin-1
WBGene00000776	22917.9	-0.153707	0.27485	-0.559239	0.575999	0.725664	cpl-1
WBGene00000777	4143.54	0.224516	0.0985009	2.27933	0.0226472	0.0708281	cpn-1
WBGene00000778	518.561	-0.58409	0.27064	-2.15818	0.0309138	0.0899018	cpn-2
WBGene00000779	10688.1	0.272114	0.0818948	3.32273	0.000891422	0.00514975	cpn-3
WBGene00000780	1578.73	-0.0758443	0.0857708	-0.884268	0.376552	0.554003	cpn-4
WBGene00000781	1904.92	0.0417866	0.143156	0.291895	0.770367	0.863372	cpr-1
WBGene00000782	1.01889	-0.798951	1.65119	-0.483863	0.628483	NA	cpr-2
WBGene00000783	1119.51	1.979	0.187129	10.5756	3.86822e-26	7.25139e-24	cpr-3
WBGene00000784	12351.1	-0.326691	0.155833	-2.09642	0.0360447	0.101208	cpr-4
WBGene00000785	8874.75	-1.04228	0.140861	-7.39939	1.36814e-13	7.41105e-12	cpr-5
WBGene00000786	24972.6	0.0297534	0.231859	0.128325	0.897892	0.940936	cpr-6
WBGene00000787	1239.54	0.0877941	0.056439	1.55556	0.119813	0.250332	cps-6
WBGene00000788	11865.9	0.0186771	0.269181	0.0693849	0.944683	0.968323	cpz-1
WBGene00000789	6170.41	0.391165	0.116852	3.34754	0.000815335	0.00476631	cpz-2
WBGene00000792	505.684	-0.191475	0.221867	-0.86302	0.388127	0.565793	crb-1
WBGene00000793	723.649	0.435767	0.0972458	4.48109	7.42631e-06	8.6042e-05	crh-1
WBGene00000794	1394.89	0.367307	0.0975833	3.76403	0.000167194	0.001252	crn-1
WBGene00000795	297.713	0.0245839	0.0993463	0.247457	0.804555	0.885555	crn-2
WBGene00000796	2195.92	-0.134436	0.0740171	-1.81628	0.0693275	0.166426	crn-3
WBGene00000797	151.131	0.0582519	0.26704	0.218139	0.827321	0.898634	crn-4
WBGene00000798	415.074	-0.241365	0.102581	-2.35293	0.0186263	0.0607669	crn-5
WBGene00000799	358.728	-0.0937702	0.104236	-0.899598	0.368334	0.545811	crn-6
WBGene00000800	4957.43	-0.251093	0.0453919	-5.53167	3.17188e-08	7.00923e-07	cars-1
WBGene00000801	165.927	0.0958978	0.159276	0.602087	0.547116	0.702918	cars-2
WBGene00000802	48972.3	-0.391933	0.0971326	-4.03503	5.45952e-05	0.000480415	crt-1
WBGene00000803	180.27	0.590283	0.159573	3.69914	0.000216328	0.00155838	csb-1
WBGene00000804	687.996	0.275326	0.105275	2.61529	0.00891509	0.0338352	csc-1
WBGene00000812	1266.8	-0.0796516	0.0649381	-1.22658	0.219982	0.386538	csk-1
WBGene00000813	1176.37	-0.0179537	0.0614542	-0.292147	0.770174	0.863257	csn-1
WBGene00000814	1936.15	-0.0277316	0.0610809	-0.454015	0.649818	0.778904	csn-2
WBGene00000815	1280.58	-0.121393	0.0763382	-1.59021	0.111789	0.238288	csn-3
WBGene00000816	1205.43	0.0427511	0.0841046	0.508309	0.611237	0.751865	csn-4
WBGene00000817	1137.53	0.0990332	0.0820045	1.20766	0.22718	0.395149	csn-5
WBGene00000818	1154.69	0.109271	0.0653174	1.67292	0.0943431	0.209786	csn-6
WBGene00000819	27.6601	-0.46817	0.358095	-1.30739	0.19108	0.351719	csp-1
WBGene00000820	169.528	-0.764243	0.263788	-2.89719	0.00376523	0.0168371	csp-2
WBGene00000821	8.00191	-1.80905	0.642746	-2.81456	0.00488446	0.020826	csp-3
WBGene00000822	7579.98	0.087273	0.0690078	1.26468	0.205985	0.371193	csq-1
WBGene00000829	19782.5	0.181	0.134603	1.34469	0.178724	0.335755	ctb-1
WBGene00000830	1328.92	-0.0417432	0.142104	-0.293752	0.768947	0.86237	ctl-1
WBGene00000831	2270.38	0.141955	0.114992	1.23448	0.217025	0.383727	ctl-2
WBGene00000832	627.309	0.0263109	0.150969	0.174281	0.861645	0.919573	ctn-1
WBGene00000833	19150	-0.383555	0.0610565	-6.28198	3.34291e-10	1.11546e-08	cts-1
WBGene00000834	2552.95	-0.135261	0.0907349	-1.49073	0.136033	0.275501	cua-1
WBGene00000835	1673.91	-0.732671	0.193403	-3.78831	0.000151677	0.00115236	cuc-1
WBGene00000836	2382.84	-0.20907	0.0494504	-4.22787	2.35915e-05	0.000235972	cul-1
WBGene00000837	3144.78	0.0783865	0.0707268	1.1083	0.267732	0.440909	cul-2
WBGene00000838	4261.56	-0.233942	0.0679989	-3.44037	0.000580911	0.00356976	cul-3
WBGene00000839	1429.05	0.0133865	0.0687033	0.194845	0.845514	0.90969	cul-4
WBGene00000840	1595.63	-0.0400417	0.0729387	-0.548977	0.583021	0.731413	cul-5
WBGene00000841	204.056	0.283954	0.16862	1.68399	0.0921832	0.206164	cul-6
WBGene00000843	2427.9	-0.0872188	0.113793	-0.766471	0.443396	0.61688	cup-2
WBGene00000845	241.08	-0.423597	0.121633	-3.48259	0.000496597	0.00312532	cup-4
WBGene00000846	1021.56	0.176886	0.113782	1.5546	0.120041	0.250689	cup-5
WBGene00000851	2.08803	1.90951	1.16909	1.63333	0.1024	NA	cut-1
WBGene00000853	63.1732	0.114469	0.524577	0.218213	0.827263	0.89863	cut-6
WBGene00000854	695.936	-0.35118	0.0849021	-4.1363	3.52954e-05	0.000330268	cux-7
WBGene00000857	251.647	0.161124	0.12716	1.2671	0.205121	0.370277	cwn-1
WBGene00000858	127.564	0.0891005	0.220157	0.404713	0.685689	0.804899	cwn-2
WBGene00000859	0.0971116	0.498196	3.81693	0.130523	0.896153	NA	cwp-1
WBGene00000860	0.241934	1.33692	3.59853	0.371519	0.710251	NA	cwp-2
WBGene00000861	0.32206	-1.06811	3.35875	-0.318007	0.75048	NA	cwp-3
WBGene00000862	21.5043	-0.395629	0.326479	-1.21181	0.225586	0.393281	cwp-4
WBGene00000863	992.19	0.0493453	0.105987	0.465578	0.641518	0.772842	cya-1
WBGene00000864	32.0709	-1.23328	0.305564	-4.03608	5.43522e-05	0.000478529	cya-2
WBGene00000865	5362.84	0.143357	0.0947987	1.51223	0.130476	0.266915	cyb-1
WBGene00000866	1270.73	0.520051	0.226291	2.29815	0.0215531	0.0681434	cyb-2.1
WBGene00000867	1758.98	0.421923	0.194987	2.16386	0.0304754	0.0889834	cyb-2.2
WBGene00000868	4097.51	0.416754	0.174665	2.38601	0.0170321	0.0565274	cyb-3
WBGene00000869	11085	-0.242027	0.0851264	-2.84315	0.00446697	0.0193879	cyc-1
WBGene00000870	57.013	0.464332	0.365018	1.27208	0.203345	0.367962	cyd-1
WBGene00000871	1712.09	0.257957	0.109892	2.34736	0.0189068	0.0614716	cye-1
WBGene00000872	1397.67	0.0114661	0.0643592	0.178158	0.858599	0.917752	cyk-1
WBGene00000874	2104.78	-0.0402441	0.0542215	-0.742218	0.457956	0.629053	cyk-3
WBGene00000875	2783.42	0.0488702	0.0631791	0.773517	0.439216	0.61347	cyk-4
WBGene00000876	1752.86	0.176561	0.0503809	3.50452	0.000457435	0.00292184	cyl-1
WBGene00000877	3440.11	-0.409203	0.0845326	-4.84077	1.29337e-06	1.87151e-05	cyn-1
WBGene00000878	1692.32	-0.312727	0.0640197	-4.88486	1.03502e-06	1.54595e-05	cyn-2
WBGene00000879	6392.66	-0.201702	0.075937	-2.65618	0.00790318	0.0306643	cyn-3
WBGene00000880	865.931	0.00931887	0.0785081	0.118699	0.905513	0.945347	cyn-4
WBGene00000881	12680.2	-0.2368	0.107991	-2.19278	0.028323	0.0840671	cyn-5
WBGene00000882	1514.86	-0.549574	0.316714	-1.73524	0.0826988	0.190336	cyn-6
WBGene00000883	26396.2	-0.338143	0.0716594	-4.71876	2.37289e-06	3.20302e-05	cyn-7
WBGene00000884	267.446	0.113727	0.168724	0.674043	0.500284	0.664655	cyn-8
WBGene00000885	577.34	-0.134419	0.0912896	-1.47244	0.140902	0.282753	cyn-9
WBGene00000886	361.081	0.262766	0.133187	1.97291	0.0485058	0.126488	cyn-10
WBGene00000887	520.422	-0.0339534	0.0680668	-0.498826	0.617902	0.756408	cyn-11
WBGene00000888	575.87	-0.0474939	0.0873893	-0.543475	0.586803	0.73423	cyn-12
WBGene00000889	1211.66	-0.0834815	0.0523484	-1.59473	0.110773	0.236697	cyn-13
WBGene00000890	778.518	-0.0575883	0.0857571	-0.671528	0.501884	0.665615	sig-7
WBGene00000891	1232.1	-0.0475297	0.0634337	-0.749282	0.453687	0.625748	cyn-15
WBGene00000892	675.364	0.0388392	0.0689651	0.563172	0.573318	0.723474	cyn-16
WBGene00000893	878.088	-0.254882	0.504137	-0.505581	0.613151	0.75328	cyn-17
WBGene00000894	4981.41	0.406873	0.0822823	4.94484	7.62066e-07	1.17616e-05	dab-1
WBGene00000895	168.45	-0.173792	0.141561	-1.22768	0.219567	0.386038	dac-1
WBGene00000896	2492.72	-0.200937	0.0871884	-2.30463	0.0211871	0.0673178	dad-1
WBGene00000897	391.102	0.195314	0.0923703	2.11447	0.0344754	0.097871	daf-1
WBGene00000898	1821.99	0.340335	0.0854847	3.98124	6.85574e-05	0.000585969	daf-2
WBGene00000899	636.593	0.552013	0.103378	5.33976	9.30694e-08	1.8376e-06	daf-3
WBGene00000900	523.288	0.31578	0.097564	3.23665	0.00120942	0.00661571	daf-4
WBGene00000901	1181.6	0.447117	0.108283	4.12914	3.64116e-05	0.00033976	daf-5
WBGene00000902	276.185	-0.20474	0.395211	-0.518052	0.604422	0.746438	daf-6
WBGene00000903	262.809	0.205705	0.126711	1.62341	0.104501	0.226135	daf-7
WBGene00000904	315.394	0.0435633	0.127194	0.342495	0.731979	0.837092	daf-8
WBGene00000905	71.169	0.21533	0.179345	1.20065	0.229888	0.398096	daf-9
WBGene00000906	45.2087	0.0361958	0.246172	0.147034	0.883105	0.932396	daf-10
WBGene00000907	31.262	0.167483	0.272775	0.613998	0.539217	0.696523	daf-11
WBGene00000908	826.689	0.129636	0.0882598	1.46881	0.141886	0.284078	daf-12
WBGene00000910	369.39	0.271773	0.106566	2.55028	0.0107637	0.0393217	daf-14
WBGene00000911	3136.11	-0.0818397	0.0470527	-1.73932	0.0819783	0.189121	daf-15
WBGene00000912	3438.11	0.202046	0.0980714	2.06019	0.0393803	0.108098	daf-16
WBGene00000913	2997.39	0.46578	0.177635	2.62213	0.00873833	0.033337	daf-18
WBGene00000914	249.918	0.298982	0.102853	2.9069	0.0036503	0.0164023	daf-19
WBGene00000915	67613.7	-0.377329	0.101801	-3.70655	0.000210102	0.00151878	daf-21
WBGene00000917	519.11	-0.0525441	0.0732303	-0.717519	0.473054	0.641192	daf-25
WBGene00000920	133.244	-0.330816	0.16299	-2.02967	0.0423898	0.114402	daf-28
WBGene00000923	1465.23	-0.47221	0.0976995	-4.83328	1.34299e-06	1.93326e-05	daf-31
WBGene00000928	2435.82	-1.09305	0.91942	-1.18885	0.234498	0.403587	dao-2
WBGene00000929	1232.38	-0.0373812	0.246864	-0.151425	0.879641	0.930092	dao-3
WBGene00000930	1975.97	-0.835814	0.604763	-1.38205	0.166956	0.320192	dao-4
WBGene00000931	9932.44	-0.166459	0.0757219	-2.19829	0.0279284	0.0832913	dao-5
WBGene00000932	137.191	0.171387	0.216065	0.793218	0.427651	0.603337	dao-6
WBGene00000933	1496.66	-0.494733	0.0589282	-8.39553	4.63807e-17	3.84966e-15	dap-3
WBGene00000934	104.703	0.0783108	0.158993	0.492542	0.622336	0.759472	dat-1
WBGene00000935	3308.68	0.31019	0.089336	3.47217	0.000516262	0.00323687	daz-1
WBGene00000936	288.073	0.240737	0.096461	2.49569	0.0125711	0.0444451	dbl-1
WBGene00000937	600.432	0.153723	0.0896517	1.71467	0.0864057	0.196376	dbr-1
WBGene00000938	2233.81	0.0298093	0.0586988	0.507835	0.611569	0.752131	dcp-66
WBGene00000939	2866.87	-0.10861	0.0559241	-1.9421	0.052125	0.133342	dcr-1
WBGene00000940	672.256	-0.102421	0.0909086	-1.12664	0.259894	0.432243	dcs-1
WBGene00000941	1243.74	-0.338898	0.0938941	-3.60937	0.000306942	0.00208936	ddp-1
WBGene00000942	6300.42	0.0109642	0.135387	0.080984	0.935455	0.962571	deb-1
WBGene00000950	175.316	0.0895234	0.158972	0.563139	0.57334	0.723474	deg-1
WBGene00000951	153.217	0.259296	0.121057	2.14194	0.0321983	0.0928352	deg-3
WBGene00000952	39.6922	-0.25124	0.23053	-1.08984	0.275785	0.449598	del-1
WBGene00000953	36.5979	-0.0493547	0.2349	-0.210109	0.833582	0.903472	del-2
WBGene00000955	207.486	0.106108	0.124599	0.851598	0.394437	0.571646	des-2
WBGene00000958	383.133	0.148459	0.0809943	1.83296	0.0668092	0.161895	dgk-1
WBGene00000959	1178.57	-0.122944	0.0994211	-1.2366	0.216236	0.382787	dgk-2
WBGene00000960	19.3478	-0.16203	0.314857	-0.514615	0.606822	0.748323	dgk-3
WBGene00000961	1559.89	-0.236548	0.0758576	-3.11832	0.00181883	0.00929415	dgn-1
WBGene00000962	13250.9	-0.215847	0.0885575	-2.43737	0.0147945	0.05057	dhc-1
WBGene00000963	452.44	-0.229699	0.116472	-1.97213	0.0485948	0.126681	dhp-1
WBGene00000964	508.631	-0.0477591	0.14281	-0.334425	0.738059	0.841754	dhp-2
WBGene00000965	874.347	0.201678	0.081828	2.46466	0.0137144	0.0475995	dhs-1
WBGene00000966	502.648	-0.0786447	0.0779837	-1.00848	0.313226	0.48945	dhs-2
WBGene00000967	4214.28	0.156176	0.098537	1.58495	0.112979	0.240128	dhs-3
WBGene00000968	63.5613	0.199705	0.18153	1.10012	0.271282	0.444429	dhs-4
WBGene00000969	295.19	0.0221547	0.137306	0.161353	0.871816	0.92516	dhs-5
WBGene00000970	1756.26	0.0862538	0.0747216	1.15434	0.248363	0.419656	dhs-6
WBGene00000971	420.935	0.106756	0.199693	0.534602	0.592925	0.738401	dhs-7
WBGene00000972	6.87426	-0.296466	0.570331	-0.519814	0.603193	0.74581	dhs-8
WBGene00000973	844.745	-0.0858309	0.168107	-0.510572	0.609651	0.750755	dhs-9
WBGene00000974	432.543	-0.0920584	0.0982739	-0.936753	0.348885	0.526674	dhs-11
WBGene00000975	984.26	-0.29465	0.0895898	-3.28888	0.00100588	0.00568025	dhs-12
WBGene00000976	1528.12	-0.0773135	0.0654359	-1.18151	0.237399	0.407035	dhs-13
WBGene00000977	641.302	0.479281	0.0713525	6.71709	1.8539e-11	7.58098e-10	dhs-14
WBGene00000978	25.1354	-0.0610556	0.437467	-0.139566	0.889003	0.936194	dhs-15
WBGene00000979	54.8193	0.55756	0.602128	0.925983	0.354455	0.532337	dhs-16
WBGene00000980	120.948	0.445365	0.192549	2.313	0.0207227	0.0662079	dhs-17
WBGene00000981	442.931	0.123545	0.117561	1.05091	0.293302	0.467556	dhs-18
WBGene00000982	790.597	0.502054	0.194663	2.5791	0.00990576	0.0367425	dhs-19
WBGene00000983	405.278	0.317968	0.139502	2.27931	0.0226485	0.0708281	dhs-20
WBGene00000984	2697.51	-0.281396	0.172902	-1.62749	0.103634	0.224794	dhs-21
WBGene00000985	1983.3	0.0556337	0.0815659	0.682071	0.495194	0.660311	dhs-22
WBGene00000986	49.7037	-0.285107	0.287319	-0.992303	0.32105	0.498084	dhs-23
WBGene00000987	1399.87	-0.246073	0.0514879	-4.77924	1.75963e-06	2.44851e-05	dhs-24
WBGene00000988	757.284	-0.512134	0.10175	-5.03325	4.82239e-07	7.83415e-06	dhs-25
WBGene00000989	21.8337	1.31328	0.398364	3.29669	0.000978316	0.00555366	dhs-26
WBGene00000990	133.541	0.0818763	0.216278	0.378569	0.705008	0.819345	dhs-27
WBGene00000991	5236.25	0.00312412	0.103178	0.0302789	0.975845	0.98595	dhs-28
WBGene00000992	279.141	-0.318426	0.217925	-1.46117	0.143968	0.287316	dhs-29
WBGene00000993	686.162	0.0758516	0.0693637	1.09353	0.274159	0.44784	dhs-30
WBGene00000994	761.245	-0.125801	0.0697903	-1.80256	0.0714576	0.170363	dic-1
WBGene00000995	626.136	0.171828	0.209111	0.821708	0.411243	0.587832	die-1
WBGene00000996	2031.39	-0.114087	0.112355	-1.01542	0.309908	0.485819	dif-1
WBGene00000998	5120.64	-0.227587	0.132014	-1.72395	0.0847161	0.193564	dig-1
WBGene00001000	17469.1	0.0601961	0.0574429	1.04793	0.294672	0.469023	dim-1
WBGene00001001	2476.96	-0.205633	0.0497707	-4.13161	3.60226e-05	0.000336507	dis-3
WBGene00001002	999.967	-0.0686235	0.0772004	-0.8889	0.374057	0.551645	div-1
WBGene00001005	7544.22	-0.223339	0.0623544	-3.58177	0.000341272	0.00229034	dlc-1
WBGene00001006	3027.06	0.234447	0.195436	1.19961	0.230292	0.398651	dlg-1
WBGene00001007	1688.17	-0.18552	0.0626073	-2.96323	0.00304426	0.0140954	dli-1
WBGene00001008	1484.12	-0.164832	0.105841	-1.55736	0.119386	0.249642	dlk-1
WBGene00001016	1182.16	0.220249	0.0674198	3.26682	0.00108762	0.00605669	dna-2
WBGene00001017	3256.08	-0.0267353	0.0615609	-0.43429	0.664078	0.789137	dnc-1
WBGene00001018	1167.98	-0.106079	0.0618707	-1.71453	0.0864313	0.196407	dnc-2
WBGene00001019	1706.7	-0.152432	0.0717541	-2.12437	0.0336391	0.0961348	dnj-1
WBGene00001020	1120.52	-0.346311	0.128434	-2.69642	0.00700903	0.0278094	dnj-2
WBGene00001021	155.218	-0.256997	0.118722	-2.1647	0.0304109	0.0888263	dnj-3
WBGene00001022	328.534	0.263038	0.106191	2.47702	0.0132483	0.0463287	dnj-4
WBGene00001023	4669.16	0.0266235	0.0972755	0.273691	0.784322	0.872433	dnj-5
WBGene00001025	2206.08	-0.5387	0.148513	-3.62729	0.000286411	0.00196888	dnj-7
WBGene00001026	1552.77	0.0526907	0.0726328	0.725439	0.468183	0.636606	dnj-8
WBGene00001027	1115.38	-0.352819	0.0636161	-5.54606	2.92172e-08	6.54309e-07	dnj-9
WBGene00001028	1354.56	-0.379738	0.0689657	-5.50618	3.667e-08	8.00787e-07	dnj-10
WBGene00001029	3346.21	-0.322361	0.074473	-4.32856	1.50088e-05	0.000159191	dnj-11
WBGene00001030	6114.47	-0.100454	0.100515	-0.999393	0.317605	0.494288	dnj-12
WBGene00001031	3646.53	-0.132055	0.115648	-1.14187	0.253507	0.425041	dnj-13
WBGene00001032	670.675	0.238657	0.071058	3.35862	0.000783331	0.00459856	dnj-14
WBGene00001033	397.245	-0.174008	0.0800182	-2.1746	0.0296601	0.0869989	dnj-15
WBGene00001034	1178.36	-0.05124	0.0635705	-0.806035	0.420223	0.596173	dnj-16
WBGene00001035	859.935	-0.0847386	0.078098	-1.08503	0.277909	0.451035	dnj-17
WBGene00001036	325.019	0.0494844	0.104139	0.475175	0.634662	0.767659	dnj-18
WBGene00001037	6633.16	-0.128106	0.0797638	-1.60607	0.108259	0.232786	dnj-19
WBGene00001038	9627.03	0.0709155	0.0918425	0.772142	0.44003	0.614116	dnj-20
WBGene00001039	377.824	-0.510247	0.0941192	-5.42128	5.91726e-08	1.21581e-06	dnj-21
WBGene00001040	954.438	0.0757316	0.119264	0.634993	0.525433	0.684495	dnj-22
WBGene00001041	844.673	0.168547	0.0949634	1.77487	0.07592	0.178376	dnj-23
WBGene00001042	929.197	0.106385	0.064115	1.65929	0.0970572	0.21442	dnj-24
WBGene00001043	1814.5	-0.113776	0.0717248	-1.58628	0.112675	0.239658	dnj-25
WBGene00001044	243.363	0.115678	0.162751	0.710765	0.47723	0.645122	dnj-26
WBGene00001045	724.155	-0.709445	0.258253	-2.7471	0.00601255	0.0245745	dnj-27
WBGene00001046	612.179	-0.362828	0.0820048	-4.42447	9.66777e-06	0.000108108	dnj-28
WBGene00001047	6088.67	-0.270714	0.0724911	-3.73445	0.000188127	0.0013833	dnj-29
WBGene00001048	617.741	-0.169781	0.0850954	-1.99518	0.0460233	0.121746	dnj-30
WBGene00001049	959.014	-0.0789039	0.0640168	-1.23255	0.217743	0.384467	dog-1
WBGene00001050	411.7	-0.00319721	0.0903705	-0.0353789	0.971778	0.983867	dom-3
WBGene00001051	1274.16	0.141512	0.145792	0.970644	0.331726	0.509014	cks-1
WBGene00001052	82.5067	0.262249	0.161479	1.62405	0.104365	0.225869	dop-1
WBGene00001053	174.904	0.376812	0.141022	2.672	0.00754005	0.0294747	dop-2
WBGene00001054	473.316	0.106555	0.150392	0.708516	0.478625	0.646115	dpf-1
WBGene00001055	980.336	0.277464	0.26286	1.05556	0.29117	0.465117	dpf-2
WBGene00001056	3776.91	-0.124365	0.047011	-2.64544	0.00815856	0.031465	dpf-3
WBGene00001057	1797.15	-0.266033	0.0524435	-5.07276	3.92091e-07	6.57978e-06	dpf-4
WBGene00001058	3985.4	0.0944884	0.0490828	1.92508	0.0542191	0.137455	dpf-5
WBGene00001059	501.372	-0.310617	0.604027	-0.514243	0.607082	0.748489	dpf-6
WBGene00001060	762.664	-0.0547124	0.0845234	-0.647304	0.517435	0.677464	dpf-7
WBGene00001061	960.878	0.160709	0.104592	1.53654	0.124407	0.257392	dpl-1
WBGene00001062	0.153772	1.14781	3.80789	0.30143	0.763087	NA	dpr-1
WBGene00001063	46.7231	0.222067	0.34187	0.649567	0.515972	0.676331	dpy-1
WBGene00001064	591.999	-1.07662	1.03549	-1.03972	0.29847	0.473489	dpy-2
WBGene00001065	432.851	-1.26217	1.18462	-1.06546	0.286669	0.459883	dpy-3
WBGene00001066	29689.4	-0.257207	0.409635	-0.627893	0.530074	0.688905	dpy-4
WBGene00001067	26781.1	-0.217369	0.340556	-0.638278	0.523293	0.682826	dpy-5
WBGene00001068	105.516	-0.90934	0.704332	-1.29107	0.19668	0.35937	dpy-6
WBGene00001069	566.841	-1.10291	1.14362	-0.964401	0.334845	0.512484	dpy-7
WBGene00001070	868.539	-1.11355	0.983867	-1.13181	0.257713	0.429867	dpy-8
WBGene00001071	649.197	-0.899526	1.16285	-0.773552	0.439196	0.61347	dpy-9
WBGene00001072	654.658	-0.948146	1.0347	-0.916349	0.359484	0.536989	dpy-10
WBGene00001073	5950.69	-0.732681	0.323047	-2.26804	0.023327	0.0723936	dpy-11
WBGene00001074	29568.4	-0.24318	0.352134	-0.690589	0.489824	0.655844	dpy-13
WBGene00001075	4.55924	-0.0909272	0.662419	-0.137265	0.890821	0.937142	dpy-14
WBGene00001076	28.8304	0.215556	0.292609	0.736668	0.461324	0.631427	dpy-17
WBGene00001077	8456.26	-0.787481	0.175252	-4.49343	7.0085e-06	8.16549e-05	dpy-18
WBGene00001078	114.005	-0.405164	0.292275	-1.38624	0.165673	0.318261	dpy-19
WBGene00001079	184.075	-0.196076	0.344372	-0.569371	0.569104	0.719968	dpy-20
WBGene00001080	1355.38	0.00479889	0.0777022	0.06176	0.950754	0.971951	dpy-21
WBGene00001081	2396.28	0.105476	0.0712814	1.47972	0.138948	0.279843	dpy-22
WBGene00001082	1069.67	-0.0391152	0.117844	-0.331925	0.739946	0.84291	dpy-23
WBGene00001085	2308.21	0.0382104	0.0486272	0.785781	0.431996	0.607149	dpy-26
WBGene00001086	1005.59	0.189636	0.155055	1.22302	0.221321	0.387911	dpy-27
WBGene00001087	1434.96	-0.0843681	0.0506753	-1.66488	0.0959377	0.212425	dpy-28
WBGene00001088	1756.82	0.0230955	0.103393	0.223374	0.823244	0.896833	dpy-30
WBGene00001089	1916.94	-0.165116	0.214047	-0.771398	0.440471	0.614501	dre-1
WBGene00001090	1074.5	-0.108787	0.0731285	-1.48761	0.136853	0.276842	drh-1
WBGene00001091	2282.49	0.00782911	0.128847	0.060763	0.951548	0.972279	drh-2
WBGene00001092	529.704	0.140216	0.10302	1.36105	0.173499	0.329351	dro-1
WBGene00001093	2229.36	-0.0349571	0.0709984	-0.492364	0.622462	0.759537	drp-1
WBGene00001094	6418.62	-0.271961	0.0499756	-5.44187	5.27243e-08	1.09819e-06	dars-1
WBGene00001095	622.517	-0.295904	0.0745992	-3.96658	7.29099e-05	0.000618104	dars-2
WBGene00001096	7.24259	-0.272169	0.545349	-0.499073	0.617728	0.756305	dsc-1
WBGene00001099	4507.5	-0.245483	0.141044	-1.74047	0.0817764	0.188734	dsc-4
WBGene00001101	625.738	0.265056	0.0817066	3.24399	0.00117867	0.00647298	dsh-1
WBGene00001102	1067.03	0.228649	0.145255	1.57412	0.115459	0.243652	dsh-2
WBGene00001103	1.08761	-0.962611	1.31724	-0.73078	0.464914	NA	dsl-1
WBGene00001104	1.64886	2.3342	1.291	1.80805	0.0705982	NA	dsl-2
WBGene00001105	5.30872	-0.477684	0.592108	-0.806752	0.419809	0.595981	dsl-3
WBGene00001106	0.974629	-0.702474	1.70121	-0.412925	0.679661	NA	dsl-4
WBGene00001107	1.66188	0.515418	1.26031	0.408961	0.682568	NA	dsl-5
WBGene00001108	0.581893	-0.605088	1.92148	-0.314907	0.752832	NA	dsl-6
WBGene00001109	118.434	0.149208	0.186825	0.798652	0.424492	0.600341	dsl-7
WBGene00001110	623.667	0.0943831	0.130923	0.720904	0.470969	0.638851	duo-1
WBGene00001111	7.83669	-0.428736	0.542336	-0.790536	0.429215	0.604918	duo-2
WBGene00001112	1249.28	-0.0369867	0.0972963	-0.380145	0.703838	0.818774	duo-3
WBGene00001113	2003.27	0.0901764	0.188981	0.477172	0.63324	0.766348	dur-1
WBGene00001115	139.528	-0.206303	0.318752	-0.647223	0.517488	0.677477	dyb-1
WBGene00001116	448.089	0.177447	0.079689	2.22674	0.0259643	0.0788333	dyc-1
WBGene00001117	48.1584	-0.455748	0.208167	-2.18934	0.0285725	0.0846419	dyf-1
WBGene00001118	73.8828	0.228529	0.185762	1.23023	0.218612	0.385227	dyf-2
WBGene00001119	75.4703	-1.00451	0.374572	-2.68176	0.00732353	0.0287902	dyf-3
WBGene00001121	31.7174	0.235508	0.2736	0.860774	0.389363	0.566852	dyf-5
WBGene00001122	42.202	0.0177688	0.289145	0.0614529	0.950999	0.971951	dyf-6
WBGene00001123	197.39	0.165065	0.111057	1.48631	0.137197	0.277252	dyf-7
WBGene00001127	20.6006	0.402021	0.326384	1.23174	0.218045	0.384838	dyf-11
WBGene00001129	13.9011	-0.287692	0.391221	-0.735369	0.462115	0.63194	dyf-13
WBGene00001130	1840.37	0.0155287	0.0811012	0.191473	0.848155	0.911544	dyn-1
WBGene00001131	3498.14	0.194811	0.106355	1.83171	0.0669951	0.162227	dys-1
WBGene00001132	7116.78	-0.0152969	0.0938183	-0.163048	0.870481	0.924768	alp-1
WBGene00001133	21.7084	0.145458	0.318697	0.456414	0.648092	0.777474	eat-2
WBGene00001134	2629.98	-0.124156	0.0627519	-1.97853	0.0478693	0.125279	eat-3
WBGene00001135	106.418	0.0673234	0.144106	0.467179	0.640372	0.772135	eat-4
WBGene00001136	35.7525	0.144988	0.247123	0.586704	0.557403	0.711186	eat-5
WBGene00001137	31693.8	-0.0247391	0.0766959	-0.322561	0.747028	0.847909	eat-6
WBGene00001145	762.781	0.242299	0.0901628	2.68735	0.00720215	0.0284001	eat-16
WBGene00001147	16.6155	0.852138	0.424625	2.0068	0.0447709	0.11917	eat-18
WBGene00001148	1266.1	-0.208233	0.303548	-0.685995	0.492716	0.65796	eat-20
WBGene00001149	4367.58	-0.178959	0.122498	-1.46091	0.14404	0.28739	bcat-1
WBGene00001150	233.166	-0.168425	0.183073	-0.919987	0.357579	0.535054	ech-1.1
WBGene00001151	720.633	-0.362701	0.0680301	-5.33147	9.74184e-08	1.91666e-06	ech-2
WBGene00001152	265.089	-0.144167	0.1074	-1.34234	0.179487	0.336621	ech-3
WBGene00001153	2544.08	0.0228181	0.0777866	0.293342	0.769261	0.862581	ech-4
WBGene00001154	1671.94	-0.443146	0.0541439	-8.18459	2.73226e-16	2.00815e-14	ech-5
WBGene00001155	3807.37	-0.669582	0.0932246	-7.18246	6.84701e-13	3.44083e-11	ech-6
WBGene00001156	649.825	-1.39516	0.337509	-4.13369	3.56979e-05	0.000333848	ech-7
WBGene00001157	333.912	0.27847	0.095843	2.90548	0.00366687	0.0164634	ech-8
WBGene00001158	423.892	2.71337	0.319391	8.49547	1.97141e-17	1.67811e-15	ech-9
WBGene00001159	241.267	-0.40091	0.216766	-1.84951	0.0643843	0.157321	eff-1
WBGene00001160	1903.82	0.220317	0.0691109	3.18787	0.00143323	0.00759925	efk-1
WBGene00001161	645.971	0.184253	0.10279	1.79253	0.0730483	0.173283	efl-1
WBGene00001162	337.567	-0.0603524	0.115193	-0.523925	0.600331	0.744014	efl-2
WBGene00001163	233.476	-0.140095	0.119582	-1.17154	0.24138	0.411567	efn-2
WBGene00001164	97.0382	0.0598287	0.148199	0.403706	0.686429	0.805244	efn-3
WBGene00001165	91.8235	-0.0428247	0.187848	-0.227975	0.819666	0.894467	efn-4
WBGene00001166	3942.99	-0.276713	0.0569263	-4.86091	1.16848e-06	1.71308e-05	eftu-2
WBGene00001167	135105	-0.0828889	0.0534044	-1.5521	0.120638	0.251559	eef-2
WBGene00001168	226696	-0.34035	0.0990888	-3.4348	0.000592999	0.00363068	eef-1A.1
WBGene00001169	26269.9	-0.183756	0.134459	-1.36664	0.171739	0.326934	eef-1A.2
WBGene00001170	11.6457	0.0307769	0.447305	0.0688052	0.945145	0.968471	egl-1
WBGene00001171	141.46	0.0886628	0.134968	0.656917	0.511234	0.672714	egl-2
WBGene00001172	2821.12	0.366063	0.0665504	5.50054	3.78627e-08	8.23355e-07	egl-3
WBGene00001173	7518.75	0.280283	0.0760201	3.68696	0.000226952	0.00161884	egl-4
WBGene00001174	58.4456	0.394626	0.192947	2.04525	0.0408303	0.111291	egl-5
WBGene00001175	29.9668	0.082978	0.282503	0.293724	0.768969	0.86237	egl-6
WBGene00001177	2993.99	0.106811	0.0682462	1.56509	0.117562	0.246718	egl-8
WBGene00001178	622.252	0.108773	0.102389	1.06235	0.288078	0.461389	egl-9
WBGene00001179	910.57	0.20304	0.0790897	2.56721	0.0102521	0.0377918	egl-10
WBGene00001182	706.005	0.123592	0.125285	0.98649	0.323893	0.500996	egl-13
WBGene00001184	452.593	0.244267	0.213068	1.14643	0.251618	0.423063	egl-15
WBGene00001185	62.8482	-0.0716302	0.181706	-0.39421	0.693426	0.810358	egl-17
WBGene00001186	152.364	0.370117	0.190117	1.94678	0.0515608	0.132304	egl-18
WBGene00001187	1564.04	-0.0608425	0.13973	-0.43543	0.66325	0.788614	egl-19
WBGene00001188	183.053	0.151937	0.114444	1.32762	0.184305	0.342956	egl-20
WBGene00001189	2686.81	0.33316	0.0581285	5.73144	9.95811e-09	2.46866e-07	egl-21
WBGene00001190	201.211	0.180235	0.127905	1.40914	0.158794	0.309212	egl-23
WBGene00001193	226.606	0.361689	0.122044	2.9636	0.00304061	0.0140876	egl-26
WBGene00001194	2607.8	0.341786	0.0927186	3.68627	0.000227567	0.00162184	egl-27
WBGene00001196	4636.62	-0.0723808	0.110042	-0.657757	0.510694	0.67231	egl-30
WBGene00001202	108.902	0.389533	0.162423	2.39827	0.0164729	0.0549779	egl-36
WBGene00001204	45.6066	0.209792	0.2466	0.850737	0.394916	0.572228	egl-38
WBGene00001207	107.257	0.186323	0.192147	0.969688	0.332202	0.509558	egl-43
WBGene00001208	1169.64	0.395154	0.0840477	4.70155	2.58197e-06	3.44071e-05	egl-44
WBGene00001209	8621.41	-0.153474	0.0456589	-3.36131	0.000775737	0.004562	egl-45
WBGene00001210	20.6923	0.496322	0.331658	1.49649	0.134527	0.27308	egl-46
WBGene00001211	32.512	-0.0246336	0.265976	-0.092616	0.926209	0.956809	egl-47
WBGene00001214	2269.91	-0.376011	0.0536637	-7.0068	2.43833e-12	1.1269e-10	ego-1
WBGene00001215	2470.55	-0.249976	0.134616	-1.85696	0.0633171	0.155068	ego-2
WBGene00001223	0.067215	0	3.81693	0	1	NA	ehn-3
WBGene00001224	1165.62	0.1213	0.0677298	1.79094	0.0733032	0.173794	ehs-1
WBGene00001225	6637.96	-0.169738	0.0565594	-3.00105	0.00269051	0.012756	eif-3.B
WBGene00001226	9249.62	-0.438978	0.09565	-4.58942	4.44485e-06	5.5674e-05	eif-3.C
WBGene00001227	5294.19	-0.206789	0.0675994	-3.05904	0.00222048	0.0109217	eif-3.D
WBGene00001228	4523.43	-0.230053	0.0626696	-3.67089	0.000241706	0.00170729	eif-3.E
WBGene00001229	3491.67	-0.45137	0.0487149	-9.26556	1.94063e-20	2.29627e-18	eif-3.F
WBGene00001230	2932.75	-0.334486	0.0742464	-4.50507	6.63499e-06	7.80114e-05	eif-3.G
WBGene00001231	3217.39	-0.284856	0.0701622	-4.05997	4.90793e-05	0.000441379	eif-3.H
WBGene00001232	4367.98	-0.169938	0.080001	-2.1242	0.0336531	0.0961582	eif-3.I
WBGene00001233	2561.07	-0.258317	0.0513874	-5.02685	4.98611e-07	8.02975e-06	eif-3.K
WBGene00001234	1930.05	-0.0886343	0.0761283	-1.16428	0.244312	0.415398	eif-6
WBGene00001235	474.596	0.245683	0.107544	2.28449	0.0223427	0.0700554	elb-1
WBGene00001236	634.136	-0.107102	0.0849915	-1.26015	0.207616	0.373076	elc-1
WBGene00001237	2.97213	1.16618	0.971173	1.20079	0.229832	NA	elc-2
WBGene00001239	10529.3	-0.0202276	0.129268	-0.156478	0.875657	0.927467	elo-1
WBGene00001240	2392.02	-1.14786	0.334745	-3.42905	0.000605693	0.00370025	elo-2
WBGene00001241	2925.28	-0.00152545	0.108278	-0.0140883	0.98876	0.993703	elo-3
WBGene00001242	430.14	-0.710382	0.343078	-2.07062	0.0383947	0.106179	elo-4
WBGene00001243	3907.88	-1.3947	0.259046	-5.38401	7.28457e-08	1.47138e-06	elo-5
WBGene00001244	7693.44	-0.94273	0.22587	-4.17378	2.99586e-05	0.000287093	elo-6
WBGene00001245	310.257	-0.874373	0.18563	-4.71031	2.47343e-06	3.31992e-05	elo-7
WBGene00001246	408.817	-0.445077	0.10572	-4.20997	2.55408e-05	0.000252144	elo-8
WBGene00001247	463.645	-0.168697	0.167185	-1.00905	0.312952	0.489206	elo-9
WBGene00001248	463.814	0.174518	0.0791497	2.20491	0.0274605	0.0822977	elp-1
WBGene00001249	267.87	-0.134078	0.103229	-1.29883	0.194002	0.355862	elt-1
WBGene00001250	574.722	0.0663706	0.167694	0.395785	0.692264	0.809428	elt-2
WBGene00001251	575.69	0.120937	0.207026	0.584164	0.55911	0.712293	elt-3
WBGene00001252	19.1086	0.750193	0.342026	2.19338	0.0282801	0.0840248	elt-4
WBGene00001253	52.854	0.324152	0.223426	1.45083	0.146828	0.291699	elt-6
WBGene00001258	3778.23	-0.237439	0.06261	-3.79235	0.00014923	0.0011348	emb-4
WBGene00001259	5455.96	-0.11065	0.0584875	-1.89185	0.0585111	0.14568	emb-5
WBGene00001262	4390.56	-0.135906	0.0648275	-2.09642	0.0360451	0.101208	emb-8
WBGene00001263	43462.8	-0.0876675	0.165578	-0.529463	0.596485	0.740843	emb-9
WBGene00001281	1077.6	-0.0154025	0.0824186	-0.186881	0.851754	0.913864	emb-27
WBGene00001284	1562.35	-0.0750291	0.0640053	-1.17223	0.241104	0.411264	emb-30
WBGene00001303	6864.64	-0.340665	0.102669	-3.31809	0.000906349	0.00522152	emo-1
WBGene00001309	869.846	0.0943161	0.0853536	1.105	0.269158	0.442313	emr-1
WBGene00001310	2.26734	0.451598	0.874399	0.516467	0.605528	NA	end-1
WBGene00001311	1.99722	-0.425818	1.09996	-0.387121	0.698667	NA	end-3
WBGene00001320	3206.94	0.316349	0.0822823	3.84468	0.000120708	0.000947268	ent-1
WBGene00001324	1141.36	0.102883	0.099705	1.03187	0.302132	0.477481	eor-1
WBGene00001325	312.146	0.248626	0.131052	1.89716	0.0578073	0.144401	eor-2
WBGene00001328	12303.9	-0.175159	0.127957	-1.36889	0.171035	0.325821	epi-1
WBGene00001329	2512.81	-0.034954	0.174134	-0.200731	0.840909	0.907612	epn-1
WBGene00001330	4009.4	0.17746	0.121704	1.45812	0.144808	0.288647	eps-8
WBGene00001331	2588.08	-0.488862	0.170455	-2.86798	0.00413099	0.0181324	erd-2
WBGene00001332	577.319	-0.041438	0.0859998	-0.481838	0.629921	0.764057	eri-1
WBGene00001333	10113.2	0.125656	0.0654945	1.91857	0.0550388	0.139047	erm-1
WBGene00001334	2057.03	-0.246218	0.109512	-2.24833	0.0245554	0.0753787	ero-1
WBGene00001335	237.97	-0.173301	0.122089	-1.41946	0.155764	0.304698	F35A5.8
WBGene00001336	4384.32	-0.112425	0.0599639	-1.87488	0.0608089	0.150368	qars-1
WBGene00001337	7012.28	-0.313397	0.0428996	-7.30537	2.765e-13	1.45525e-11	ears-1
WBGene00001338	574.042	-0.140242	0.0798599	-1.7561	0.0790708	0.184248	ears-2
WBGene00001340	2114.69	0.205946	0.0761391	2.70486	0.00683332	0.0272484	etr-1
WBGene00001345	1159.89	0.481746	0.0903756	5.33049	9.79479e-08	1.92254e-06	fos-1
WBGene00001352	1942.63	-0.059371	0.0712119	-0.833723	0.404437	0.58114	evl-14
WBGene00001358	270.116	0.0240117	0.107744	0.222859	0.823645	0.897095	evl-20
WBGene00001365	682.478	-0.148	0.0744628	-1.98757	0.046859	0.12335	exc-4
WBGene00001366	566.983	0.386875	0.0993694	3.8933	9.88879e-05	0.00080441	exc-5
WBGene00001368	759.737	0.0692716	0.150075	0.46158	0.644382	0.775199	exc-7
WBGene00001371	1095.69	-0.0468826	0.0692452	-0.677052	0.498373	0.662855	exl-1
WBGene00001372	1053.42	0.152989	0.138011	1.10852	0.267637	0.440893	exo-3
WBGene00001373	43.4304	0.17052	0.206408	0.826134	0.408728	0.585433	exp-1
WBGene00001374	215.415	0.0414855	0.106486	0.389588	0.696841	0.813199	exp-2
WBGene00001377	39.6478	-0.108748	0.301659	-0.360499	0.718474	0.828538	eya-1
WBGene00001385	21315.6	-0.0402435	0.098684	-0.407802	0.683419	0.80347	far-1
WBGene00001386	68623.6	0.163396	0.10857	1.50498	0.13233	0.26977	far-2
WBGene00001387	591.934	1.31875	0.37469	3.51959	0.000432211	0.00278848	far-3
WBGene00001388	1.07532	-0.795421	1.61176	-0.493511	0.621652	NA	far-4
WBGene00001389	140.431	-0.338607	0.196711	-1.72135	0.0851881	0.194456	far-5
WBGene00001390	1487.82	0.0152124	0.0692626	0.219633	0.826157	0.898296	far-6
WBGene00001391	103.363	-0.332049	0.300035	-1.1067	0.268424	0.441656	far-7
WBGene00001392	1754.98	-0.49039	0.0580086	-8.45374	2.82116e-17	2.36523e-15	far-8
WBGene00001393	13597.6	0.467236	0.0891518	5.24091	1.59791e-07	2.99882e-06	fat-1
WBGene00001394	15805	0.607781	0.138213	4.39744	1.09536e-05	0.000120548	fat-2
WBGene00001395	2656.66	0.55977	0.161636	3.46315	0.000533894	0.00333364	fat-3
WBGene00001396	7372.18	0.446671	0.108448	4.11877	3.80899e-05	0.000352463	fat-4
WBGene00001397	839.325	1.61097	0.36932	4.36198	1.28889e-05	0.000138645	fat-5
WBGene00001398	9357.9	-0.183736	0.27622	-0.665182	0.505934	0.669018	fat-6
WBGene00001399	342.484	1.33261	0.348915	3.81932	0.000133823	0.00103127	fat-7
WBGene00001400	10.0602	0.176779	0.539215	0.327845	0.743029	0.844799	fax-1
WBGene00001401	790.45	-0.0314531	0.0799732	-0.393295	0.694101	0.810923	fbf-1
WBGene00001402	761.145	-0.457408	0.099959	-4.57595	4.74053e-06	5.90132e-05	fbf-2
WBGene00001403	1674.64	0.262423	0.205499	1.277	0.201602	0.366078	fbl-1
WBGene00001404	3465.25	0.0128795	0.100565	0.128071	0.898093	0.940936	fbp-1
WBGene00001405	2406.65	-0.142819	0.0650929	-2.19408	0.0282298	0.0839397	fce-1
WBGene00001406	516.446	-0.284541	0.085339	-3.33424	0.000855316	0.00496514	fce-2
WBGene00001410	1015.03	0.209328	0.177744	1.17769	0.23892	0.408752	feh-1
WBGene00001411	1558.9	-0.0762457	0.0491062	-1.55267	0.120502	0.251415	fem-1
WBGene00001412	1473.7	0.294037	0.0891398	3.29861	0.000971654	0.00552148	fem-2
WBGene00001413	448.002	0.254096	0.191511	1.3268	0.184576	0.343277	fem-3
WBGene00001414	784.556	-0.739181	0.191445	-3.86106	0.000112896	0.000898211	fer-1
WBGene00001423	16513.3	-0.373518	0.0719332	-5.19256	2.07417e-07	3.76089e-06	fib-1
WBGene00001424	207.041	-0.258579	0.122078	-2.11815	0.0341624	0.0973136	fis-1
WBGene00001425	331.149	-0.291196	0.0891315	-3.26704	0.00108678	0.00605403	fis-2
WBGene00001426	2560.77	-0.140906	0.0846251	-1.66506	0.0959009	0.2124	fkb-1
WBGene00001427	7978.81	0.00984544	0.0992848	0.0991636	0.921008	0.954476	fkb-2
WBGene00001428	2549.11	-0.814404	0.335726	-2.4258	0.0152746	0.051871	fkb-3
WBGene00001429	585.198	-0.939771	0.378319	-2.48407	0.0129891	0.0456425	fkb-4
WBGene00001430	1612.27	-1.33031	0.681422	-1.95226	0.0509079	0.131032	fkb-5
WBGene00001431	5935.39	-0.35288	0.061513	-5.73667	9.65582e-09	2.40393e-07	fkb-6
WBGene00001432	49.8055	-1.49879	0.724772	-2.06795	0.038645	0.106694	fkb-7
WBGene00001433	193.853	-0.175559	0.111334	-1.57687	0.114825	0.242929	fkb-8
WBGene00001434	3.9338	1.05732	0.779755	1.35596	0.175112	0.331469	fkh-2
WBGene00001435	16.5594	2.09617	0.64073	3.27153	0.00106968	0.00597377	fkh-3
WBGene00001436	2.46573	1.78718	1.27435	1.40242	0.160789	NA	fkh-4
WBGene00001437	4.29173	0.627353	0.725575	0.864629	0.387243	0.564998	fkh-5
WBGene00001438	256.08	-0.00143096	0.143141	-0.00999682	0.992024	0.99546	fkh-6
WBGene00001439	492.84	0.12984	0.173015	0.750459	0.452978	0.625154	fkh-7
WBGene00001440	28.6475	0.153149	0.265199	0.577489	0.563609	0.715533	fkh-8
WBGene00001441	1754.75	0.0499759	0.0855434	0.584216	0.559075	0.712293	fkh-9
WBGene00001442	15.7253	0.211504	0.438881	0.481916	0.629866	0.764057	fkh-10
WBGene00001443	2055.94	0.00104891	0.0494299	0.0212201	0.98307	0.990164	fli-1
WBGene00001444	597.181	0.320868	0.110915	2.89292	0.00381683	0.0170313	flp-1
WBGene00001445	140.776	0.563742	0.147368	3.82539	0.000130565	0.00100988	flp-2
WBGene00001446	413.746	0.721342	0.098178	7.34729	2.02271e-13	1.07818e-11	flp-3
WBGene00001447	151.002	0.262881	0.135416	1.94128	0.052224	0.133467	flp-4
WBGene00001448	371.541	0.53197	0.10663	4.98895	6.07087e-07	9.62798e-06	flp-5
WBGene00001449	494.804	0.46823	0.0743132	6.30076	2.96187e-10	9.96288e-09	flp-6
WBGene00001450	187.274	0.34769	0.144118	2.41254	0.0158418	0.0534271	flp-7
WBGene00001451	369.998	0.596397	0.135565	4.39935	1.08576e-05	0.000119728	flp-8
WBGene00001452	697.094	0.198991	0.0921688	2.15899	0.0308509	0.08975	flp-9
WBGene00001453	487.63	0.193567	0.0945708	2.0468	0.0406782	0.110975	flp-10
WBGene00001454	451.03	0.112005	0.0978899	1.14419	0.252545	0.424145	flp-11
WBGene00001455	433.507	0.471661	0.0901747	5.23052	1.6903e-07	3.15447e-06	flp-12
WBGene00001456	335.683	0.116484	0.136033	0.85629	0.391837	0.569114	flp-13
WBGene00001457	642.085	0.591159	0.114769	5.15085	2.59306e-07	4.55876e-06	flp-14
WBGene00001458	193.784	0.665306	0.122388	5.43604	5.44769e-08	1.13187e-06	flp-15
WBGene00001459	368.09	0.393589	0.102308	3.84709	0.000119527	0.000939767	flp-16
WBGene00001460	300.464	0.428	0.126709	3.37781	0.000730644	0.00433656	flp-17
WBGene00001461	464.16	0.389964	0.0863257	4.51736	6.26153e-06	7.40903e-05	flp-18
WBGene00001462	272.023	0.213848	0.116321	1.83843	0.0659998	0.160352	flp-19
WBGene00001463	100.702	0.359523	0.192826	1.8645	0.0622521	0.153052	flp-20
WBGene00001464	118.176	0.657535	0.140811	4.66964	3.01732e-06	3.96074e-05	flp-21
WBGene00001465	303.112	-0.019115	0.103411	-0.184844	0.853351	0.914818	flr-1
WBGene00001466	127.578	0.183039	0.181137	1.0105	0.312256	0.488457	flr-2
WBGene00001468	124.093	-0.174445	0.155756	-1.11999	0.262719	0.43549	flr-4
WBGene00001470	356.75	0.305422	0.0985091	3.10045	0.00193227	0.00979879	baz-2
WBGene00001475	222.186	-0.0482829	0.2174	-0.222092	0.824242	0.897511	fmi-1
WBGene00001476	1006.18	0.164881	0.198049	0.832524	0.405113	0.581759	fmo-1
WBGene00001477	21.1571	-2.20648	0.430533	-5.12501	2.97524e-07	5.12798e-06	fmo-2
WBGene00001478	512.908	-0.111192	0.169573	-0.655717	0.512006	0.673327	fmo-3
WBGene00001479	2367.74	-0.223491	0.19	-1.17627	0.239488	0.409386	fmo-4
WBGene00001480	635.52	-0.257312	0.108229	-2.37748	0.0174314	0.0575063	fmo-5
WBGene00001481	191.809	0.520179	0.228804	2.27347	0.0229979	0.0715586	fog-1
WBGene00001482	327.916	0.0189101	0.192697	0.098134	0.921826	0.954713	fog-2
WBGene00001483	36.8467	-1.82313	0.485652	-3.75398	0.000174049	0.00129635	fog-3
WBGene00001484	174.176	0.460974	0.111896	4.11967	3.79418e-05	0.000351483	fox-1
WBGene00001485	737.021	0.022181	0.0635564	0.348997	0.727092	0.833867	fre-1
WBGene00001486	248.993	-0.147559	0.0928564	-1.58911	0.112036	0.238694	frh-1
WBGene00001487	419.645	-0.339372	0.0985286	-3.4444	0.000572321	0.00352347	frk-1
WBGene00001488	16245.4	0.158224	0.0453891	3.48594	0.000490412	0.00308756	frm-1
WBGene00001489	1147.37	0.0291904	0.146948	0.198645	0.84254	0.908554	frm-2
WBGene00001490	402.9	-0.00146824	0.111601	-0.0131561	0.989503	0.994151	frm-3
WBGene00001491	2767.71	0.222609	0.084666	2.62926	0.00855718	0.0327374	frm-4
WBGene00001492	1551.43	0.100356	0.101156	0.992084	0.321156	0.498157	frm-5.1
WBGene00001493	2206.32	0.314365	0.107097	2.93532	0.00333209	0.0152005	frm-7
WBGene00001494	244.235	0.0451507	0.100182	0.450688	0.652215	0.780767	frm-8
WBGene00001495	234.825	0.269006	0.141776	1.8974	0.0577749	0.144364	frm-9
WBGene00001496	1339.11	0.386813	0.120277	3.21603	0.00129978	0.00701343	frm-10
WBGene00001497	3605.47	-0.362419	0.0486386	-7.45127	9.24439e-14	5.10707e-12	fars-1
WBGene00001498	3964.04	-0.402592	0.0567297	-7.09666	1.27805e-12	6.12729e-11	fars-3
WBGene00001499	1008.28	0.189645	0.14885	1.27407	0.202639	0.36719	fsn-1
WBGene00001500	65.7937	0.618728	0.422611	1.46406	0.143177	0.28608	ftn-1
WBGene00001501	8076.05	-0.184347	0.137503	-1.34068	0.180024	0.33721	ftn-2
WBGene00001502	12483.2	0.260755	0.0840043	3.10406	0.00190882	0.00969457	ftt-2
WBGene00001503	7633.26	-0.191884	0.0636157	-3.0163	0.00255877	0.0122533	fum-1
WBGene00001505	482.669	-0.0609485	0.0783486	-0.777915	0.436619	0.610898	fut-1
WBGene00001506	178.349	0.0967634	0.171814	0.563188	0.573307	0.723474	fut-2
WBGene00001507	52.0567	0.25794	0.260575	0.989889	0.322228	0.499473	fut-4
WBGene00001508	712.418	-0.0364701	0.0826393	-0.441317	0.658983	0.785601	fut-8
WBGene00001509	1621.89	0.0201749	0.0447645	0.450689	0.652214	0.780767	fzo-1
WBGene00001510	1897.27	0.216631	0.0884389	2.4495	0.0143055	0.0492619	fzr-1
WBGene00001511	2021.07	0.179756	0.112567	1.59689	0.110291	0.236121	fzy-1
WBGene00001512	37.8854	0.325329	0.227766	1.42835	0.153191	0.300793	gab-1
WBGene00001513	1173.95	0.203757	0.0879298	2.31727	0.020489	0.0656247	gad-1
WBGene00001514	1577.02	-0.0810098	0.109154	-0.742161	0.45799	0.629053	xnd-1
WBGene00001515	202.78	0.191725	0.103844	1.84628	0.064851	0.158063	gap-1
WBGene00001516	1672.31	0.0535572	0.132464	0.404317	0.68598	0.805071	gap-2
WBGene00001517	141.359	0.362325	0.139358	2.59996	0.00932339	0.0350215	gar-1
WBGene00001518	193.548	0.145524	0.200041	0.72747	0.466938	0.635743	gar-2
WBGene00001519	168.552	0.536294	0.139208	3.85246	0.000116938	0.000924203	gar-3
WBGene00001520	5133.65	-0.278113	0.0962423	-2.88972	0.00385589	0.0171671	gas-1
WBGene00001522	293.14	0.182029	0.125518	1.45022	0.146997	0.291965	gbh-1
WBGene00001523	489.6	0.276119	0.100509	2.74722	0.00601022	0.0245711	gbh-2
WBGene00001526	2136.81	0.0603749	0.0381262	1.58356	0.113295	0.240546	gck-1
WBGene00001527	2784.11	0.0287606	0.0447465	0.642746	0.520389	0.680047	gcs-1
WBGene00001528	1.41613	0.706483	1.37523	0.513718	0.607449	NA	gcy-1
WBGene00001529	23.0927	-0.341108	0.311375	-1.09549	0.273303	0.446862	gcy-2
WBGene00001530	5.65277	1.12032	0.603776	1.85552	0.0635221	0.15551	gcy-3
WBGene00001531	3.4176	0.819465	0.802607	1.021	0.307252	NA	gcy-4
WBGene00001532	12.4177	-0.292037	0.489712	-0.596345	0.550945	0.706072	gcy-5
WBGene00001533	6.2123	1.11571	0.587062	1.9005	0.0573671	0.14356	gcy-6
WBGene00001534	15.8361	0.729084	0.456987	1.59542	0.110619	0.236582	gcy-7
WBGene00001535	33.991	0.0491978	0.263428	0.18676	0.851849	0.913864	gcy-8
WBGene00001536	30.3727	0.198685	0.246713	0.805326	0.420631	0.596651	gcy-9
WBGene00001537	144.252	0.246765	0.128417	1.92159	0.0546576	0.138307	gcy-11
WBGene00001538	2525.95	-0.261325	0.0939647	-2.7811	0.00541748	0.0226472	gcy-12
WBGene00001539	1.50774	-1.03281	1.18788	-0.869458	0.384596	NA	gcy-13
WBGene00001540	2.76492	-0.149918	1.00724	-0.148841	0.881679	NA	gcy-14
WBGene00001541	104.726	0.449893	0.157453	2.85732	0.00427234	0.0186464	gcy-15
WBGene00001542	11.4868	0.234075	0.463245	0.505295	0.613351	0.753435	gcy-17
WBGene00001543	57.0092	0.423404	0.214438	1.97448	0.0483272	0.12616	gcy-18
WBGene00001544	42.8719	0.160154	0.21892	0.731563	0.464436	0.63367	gcy-19
WBGene00001545	4.83859	0.502929	0.723995	0.694659	0.487269	0.65382	gcy-20
WBGene00001546	94.8366	0.41823	0.209967	1.99188	0.046384	0.122428	gcy-21
WBGene00001547	103.89	-0.104266	0.389159	-0.267925	0.788757	0.875382	gcy-22
WBGene00001548	34.3266	-0.0992772	0.255326	-0.388826	0.697405	0.813729	gcy-23
WBGene00001549	3.55957	-0.296042	0.882211	-0.335569	0.737196	NA	gcy-25
WBGene00001550	2.52599	1.53604	1.12691	1.36305	0.172865	NA	gcy-27
WBGene00001551	18.3787	-0.444428	0.360949	-1.23128	0.218219	0.384883	gcy-31
WBGene00001552	25.0642	0.360086	0.303904	1.18487	0.23607	0.405497	gcy-32
WBGene00001553	22.5992	1.02781	0.395633	2.59788	0.00938016	0.0351963	gcy-33
WBGene00001554	8.63968	0.0852149	0.47258	0.180318	0.856903	0.917375	gcy-34
WBGene00001555	54.2767	0.284741	0.268521	1.0604	0.288961	0.462448	gcy-35
WBGene00001556	28.4354	0.417402	0.322234	1.29534	0.195204	0.35738	gcy-36
WBGene00001557	33.2923	-0.00408583	0.263549	-0.0155031	0.987631	0.992868	gcy-37
WBGene00001558	11548.4	-0.161656	0.0747115	-2.16374	0.0304844	0.0889861	gdi-1
WBGene00001559	1966.2	0.154045	0.113556	1.35655	0.174923	0.331365	gei-1
WBGene00001560	4330.78	0.180225	0.0668374	2.69646	0.00700805	0.0278094	gei-3
WBGene00001561	2267.31	0.272484	0.0993871	2.74164	0.00611325	0.0249129	gei-4
WBGene00001562	2022	0.453208	0.0634266	7.14539	8.97385e-13	4.44272e-11	lin-66
WBGene00001563	1579.55	0.0796957	0.0829042	0.961299	0.336402	0.514199	gei-6
WBGene00001564	14928.7	0.679292	0.168363	4.03468	5.46759e-05	0.000480639	icl-1
WBGene00001565	1352.42	-0.0176184	0.0769411	-0.228985	0.81888	0.893889	gei-8
WBGene00001566	1206.75	-0.493168	0.0611413	-8.06604	7.26145e-16	5.11181e-14	acdh-13
WBGene00001568	2041.96	-0.17786	0.0464131	-3.8321	0.000127055	0.000987787	snpc-4
WBGene00001569	320.828	0.657281	0.314084	2.09269	0.0363765	0.10195	meg-3
WBGene00001570	906.63	0.0948616	0.232323	0.408318	0.68304	0.803147	gei-13
WBGene00001571	787.153	-0.0932655	0.111168	-0.838956	0.401494	0.578406	gei-14
WBGene00001572	900.096	0.181989	0.0632594	2.87688	0.00401633	0.0177224	gei-15
WBGene00001574	2594.62	0.0642249	0.0571738	1.12333	0.261299	0.433869	gei-17
WBGene00001575	36.979	0.401631	0.368357	1.09033	0.275567	0.449398	gei-18
WBGene00001577	180.77	0.875103	0.186341	4.69624	2.64995e-06	3.52285e-05	gem-4
WBGene00001578	1066.46	-0.221852	0.0853988	-2.59784	0.00938133	0.0351963	ges-1
WBGene00001579	1071.28	0.0275009	0.0802593	0.342651	0.731861	0.837072	gex-2
WBGene00001580	1403.41	-0.0944638	0.0765024	-1.23478	0.216912	0.383567	gex-3
WBGene00001581	39710.5	0.089397	0.140241	0.637452	0.52383	0.683207	gfi-1
WBGene00001582	2730.4	0.216331	0.0519967	4.16047	3.17597e-05	0.000301238	gfi-2
WBGene00001583	200.694	-0.112522	0.119299	-0.943191	0.345583	0.523843	gfi-3
WBGene00001584	1685.08	-0.0152814	0.0632	-0.241795	0.808939	0.888619	nrde-4
WBGene00001585	388.696	0.0595591	0.0906658	0.656908	0.51124	0.672714	gfl-1
WBGene00001586	29.6383	0.193161	0.297302	0.649712	0.515878	0.676331	ggr-1
WBGene00001587	42.1391	-0.118589	0.275245	-0.430848	0.666579	0.790813	ggr-2
WBGene00001588	40.589	0.0558314	0.213416	0.261608	0.793623	0.878329	ggr-3
WBGene00001589	1154.11	-0.133619	0.0576936	-2.31601	0.0205578	0.0657943	gip-1
WBGene00001590	210.563	-0.143761	0.116801	-1.23083	0.218388	0.384921	C45G3.3
WBGene00001591	463.288	0.586558	0.116425	5.03809	4.70197e-07	7.69095e-06	glc-1
WBGene00001592	200.106	0.372037	0.234116	1.58911	0.112035	0.238694	glc-2
WBGene00001593	25.6837	-0.0103721	0.273771	-0.0378862	0.969778	0.982856	glc-3
WBGene00001594	135.262	-0.0694887	0.141696	-0.490407	0.623846	0.760337	glc-4
WBGene00001595	14700.3	0.168779	0.113458	1.48758	0.136861	0.276842	gld-1
WBGene00001596	5506.6	0.0051193	0.041282	0.124008	0.901309	0.94287	gld-2
WBGene00001597	2929.88	0.367068	0.150245	2.44313	0.0145604	0.0499436	gld-3
WBGene00001598	13256.7	-0.665843	0.0563813	-11.8096	3.48055e-32	1.13862e-29	glh-1
WBGene00001599	3388.95	0.322761	0.12961	2.49024	0.0127656	0.0449706	glh-2
WBGene00001600	932.487	0.0301394	0.0989314	0.304649	0.760633	0.856649	glh-3
WBGene00001601	4207.61	-0.400147	0.0771205	-5.18859	2.1189e-07	3.82595e-06	glh-4
WBGene00001602	480.264	-0.557375	0.0828376	-6.72853	1.71382e-11	7.04272e-10	gln-1
WBGene00001603	1675.77	-0.482254	0.0722179	-6.67776	2.42619e-11	9.70357e-10	gln-2
WBGene00001604	8847.05	0.345513	0.145617	2.37276	0.0176558	0.0580889	gln-3
WBGene00001605	189.823	-0.737672	0.172717	-4.27099	1.94605e-05	0.000199068	gln-4
WBGene00001606	1462.15	0.850328	0.276432	3.07608	0.0020974	0.010427	gln-5
WBGene00001607	2970.35	0.690606	0.232286	2.97309	0.00294821	0.0137358	gln-6
WBGene00001608	108.684	0.31977	0.228126	1.40172	0.160997	0.312226	R07B1.8
WBGene00001609	2544.89	0.173915	0.114746	1.51565	0.129609	0.265552	glp-1
WBGene00001612	68.7538	-0.0378498	0.189049	-0.200211	0.841315	0.907924	glr-1
WBGene00001613	73.0765	0.0381239	0.188576	0.202167	0.839786	0.906929	glr-2
WBGene00001614	9.89068	0.452093	0.490671	0.921377	0.356854	0.534485	glr-3
WBGene00001615	244.4	0.12827	0.186245	0.688718	0.491001	0.656414	glr-4
WBGene00001616	140.01	-0.130942	0.134379	-0.974422	0.329847	0.507064	glr-5
WBGene00001617	228.578	0.0479728	0.121332	0.395385	0.692559	0.80966	glr-6
WBGene00001618	7.37108	-1.07799	0.541393	-1.99114	0.046465	0.122468	glr-7
WBGene00001619	10.4181	0.115294	0.478024	0.24119	0.809408	0.888724	glr-8
WBGene00001620	2657.82	0.0427305	0.0865047	0.493968	0.621329	0.759154	glt-1
WBGene00001621	233.813	0.544082	0.105934	5.13603	2.80607e-07	4.87672e-06	glt-3
WBGene00001622	320.267	0.105451	0.0984427	1.07119	0.284084	0.457232	glt-4
WBGene00001623	554.496	1.24527	0.130101	9.57152	1.05342e-21	1.32145e-19	glt-5
WBGene00001624	132.457	0.507463	0.16022	3.16729	0.00153865	0.0080599	glt-6
WBGene00001625	49.153	0.638414	0.220448	2.89599	0.00377969	0.0168836	glt-7
WBGene00001626	110.561	0.454853	0.726907	0.625738	NA	NA	gly-1
WBGene00001627	528.996	0.409363	0.144828	2.82655	0.00470531	0.0202203	gly-2
WBGene00001628	2071.25	-0.257541	0.0835932	-3.08089	0.00206384	0.010297	gly-3
WBGene00001629	2030.86	0.45222	0.0777926	5.81315	6.13075e-09	1.58582e-07	gly-4
WBGene00001630	3063.3	0.00684511	0.0727892	0.0940403	0.925077	0.956172	gly-5
WBGene00001631	1036.74	-0.123657	0.244865	-0.505002	0.613558	0.753633	gly-6
WBGene00001632	2397.44	0.00549987	0.0977922	0.0562403	0.95515	0.974245	gly-7
WBGene00001633	4427.34	-0.627643	0.331482	-1.89345	0.0582987	0.145303	gly-8
WBGene00001635	1866.35	-0.214517	0.0606779	-3.53533	0.000407264	0.00265167	gly-10
WBGene00001636	228.308	-0.405823	0.33761	-1.20205	0.229344	0.39734	gly-11
WBGene00001637	321.713	-0.0801383	0.202533	-0.395681	0.692341	0.809461	gly-12
WBGene00001638	528.557	0.0360784	0.0702741	0.513395	0.607675	0.74911	gly-13
WBGene00001639	64.918	-0.146464	0.189348	-0.773516	0.439217	0.61347	gly-14
WBGene00001640	8.37039	-1.27197	0.579785	-2.19386	0.0282457	0.0839722	gly-15
WBGene00001641	0	NA	NA	NA	NA	NA	gly-16
WBGene00001642	0	NA	NA	NA	NA	NA	gly-17
WBGene00001643	28.3502	0.293175	0.324137	0.904476	0.365743	0.542887	gly-18
WBGene00001644	241.239	0.0220837	0.174209	0.126766	0.899126	0.941607	gly-19
WBGene00001645	1511.7	0.194653	0.0756671	2.57249	0.0100969	0.0373105	gly-20
WBGene00001646	133.996	-0.860427	0.249663	-3.44635	0.000568206	0.00350719	gna-1
WBGene00001647	930.041	0.519284	0.191884	2.70623	0.0068051	0.0271683	gna-2
WBGene00001648	3469.29	0.0887712	0.0495243	1.79248	0.0730563	0.173283	goa-1
WBGene00001649	1514.26	0.026373	0.0864887	0.30493	0.760419	0.856466	gob-1
WBGene00001650	2984.42	0.0517171	0.140142	0.369033	0.712103	0.82425	gon-1
WBGene00001651	3219.22	0.150883	0.092494	1.63127	0.102832	0.223713	gon-2
WBGene00001653	1061.42	0.211911	0.101172	2.09456	0.0362097	0.101591	gon-4
WBGene00001660	732.272	-0.166261	0.0789805	-2.10509	0.0352831	0.0996812	gop-1
WBGene00001661	1026.73	-0.230275	0.0620244	-3.71265	0.000205097	0.00148776	gop-2
WBGene00001662	1815.14	-0.114649	0.0726763	-1.57754	0.114672	0.242699	gop-3
WBGene00001663	60.3929	0.124143	0.224748	0.552363	0.5807	0.729109	gpa-1
WBGene00001664	27.4964	0.359645	0.313492	1.14722	0.25129	0.422676	gpa-2
WBGene00001665	35.8873	0.410531	0.251315	1.63353	0.102357	0.222999	gpa-3
WBGene00001666	10.8492	0.0491075	0.41652	0.117899	0.906147	0.945731	gpa-4
WBGene00001667	12.5957	0.402815	0.412452	0.976635	0.32875	0.505868	gpa-5
WBGene00001668	6.99043	0.647204	0.620608	1.04285	0.297016	0.471828	gpa-6
WBGene00001669	150.001	0.274245	0.116909	2.34579	0.0189866	0.0616516	gpa-7
WBGene00001670	3.07239	-0.66723	0.930106	-0.71737	0.473146	NA	gpa-8
WBGene00001671	20.7541	1.86372	0.396295	4.70285	2.56556e-06	3.4243e-05	gpa-9
WBGene00001672	9.16167	0.170222	0.479593	0.35493	0.722642	0.831077	gpa-10
WBGene00001673	8.07144	0.382815	0.640131	0.598027	0.549822	0.705199	gpa-11
WBGene00001674	293.803	0.0519247	0.132187	0.392812	0.694458	0.811255	gpa-12
WBGene00001675	10.6092	-0.232694	0.500359	-0.465054	0.641893	0.773062	gpa-13
WBGene00001676	17.7174	0.413592	0.330986	1.24957	0.211455	0.377485	gpa-14
WBGene00001677	22.45	-0.903295	0.361511	-2.49867	0.0124661	0.0441205	gpa-15
WBGene00001678	827.32	-0.207632	0.113897	-1.82298	0.0683066	0.164662	gpa-16
WBGene00001679	5789.06	0.0796181	0.08652	0.920229	0.357453	0.534962	gpb-1
WBGene00001680	680.242	-0.108659	0.162807	-0.667407	0.504512	0.66772	gpb-2
WBGene00001681	48.3153	0.20763	0.233093	0.89076	0.373058	0.550854	gpc-1
WBGene00001682	1215.59	-0.0694771	0.0908369	-0.764855	0.444358	0.617651	gpc-2
WBGene00001683	2991.73	0.243599	0.164485	1.48098	0.138612	0.279266	gpd-1
WBGene00001684	9643.81	-0.320056	0.128867	-2.48362	0.0130056	0.0456908	gpd-2
WBGene00001685	12544.6	-0.15209	0.120788	-1.25914	0.207978	0.37355	gpd-3
WBGene00001686	1629.21	0.0659549	0.13852	0.47614	0.633974	0.76691	gpd-4
WBGene00001687	93.296	0.285652	0.190199	1.50186	0.133134	0.27101	gpn-1
WBGene00001688	366.29	-0.342136	0.08493	-4.02845	5.61451e-05	0.000492045	gpr-1
WBGene00001689	830.111	-0.318442	0.098894	-3.22004	0.00128174	0.00693405	gpr-2
WBGene00001690	881.511	-0.32336	0.579705	-0.557801	0.57698	0.72643	grd-1
WBGene00001691	783.304	-0.493962	0.63182	-0.781807	0.434328	0.608956	grd-2
WBGene00001692	404.366	0.509092	0.481314	1.05771	0.290187	0.463831	grd-3
WBGene00001693	11.5469	-0.264662	0.495998	-0.533595	0.593622	0.738828	grd-4
WBGene00001694	8459.05	0.0551241	0.0864111	0.637928	0.52352	0.682963	grd-5
WBGene00001695	4884.41	0.424198	0.155407	2.72959	0.00634129	0.0256294	grd-6
WBGene00001696	3.63828	-1.15778	0.756057	-1.53134	0.125686	0.259459	grd-7
WBGene00001697	0.353161	0	3.25649	0	1	NA	grd-8
WBGene00001698	5.52941	0.0143657	0.603364	0.0238093	0.981005	0.989007	grd-9
WBGene00001699	173.906	0.539139	0.4218	1.27819	0.201184	0.365518	grd-10
WBGene00001700	126.216	-1.09773	0.448067	-2.44993	0.0142885	0.0492194	grd-11
WBGene00001701	81.4605	-0.325439	0.415309	-0.783606	0.433271	0.608323	grd-12
WBGene00001702	77.8791	0.481026	0.435492	1.10456	0.269351	0.442395	grd-13
WBGene00001703	9816.54	0.0985737	0.114001	0.864673	0.387218	0.564998	grd-14
WBGene00001704	82.4644	-0.132511	0.171925	-0.770749	0.440856	0.614987	grd-15
WBGene00001705	19.7427	-0.0423011	0.4301	-0.0983518	0.921653	0.954713	grd-16
WBGene00001706	1.50212	-2.2667	1.45007	-1.56316	0.118014	NA	grd-17
WBGene00001707	307.292	0.0996277	0.317929	0.313365	0.754003	0.852463	grh-1
WBGene00001708	754.117	0.211687	0.0753301	2.81013	0.00495211	0.0210675	grk-1
WBGene00001709	291.348	0.173956	0.116755	1.48993	0.136243	0.27586	grk-2
WBGene00001710	61.846	0.262609	0.190495	1.37856	0.16803	0.321787	grl-1
WBGene00001711	26.6591	-0.283086	0.445482	-0.63546	0.525129	0.684268	grl-2
WBGene00001712	7.06867	-0.505152	0.579234	-0.872104	0.383152	0.560549	grl-3
WBGene00001713	3362.03	-0.156229	0.27343	-0.571366	0.567752	0.718804	grl-4
WBGene00001714	2364.27	-0.372638	0.6453	-0.577464	0.563626	0.715533	grl-5
WBGene00001715	13.8787	0.346912	0.42098	0.824056	0.409907	0.586627	grl-6
WBGene00001716	2878.4	-0.502296	0.716575	-0.700968	0.483323	0.650408	grl-7
WBGene00001717	39.0125	0.586116	0.280046	2.09293	0.0363556	0.101908	grl-8
WBGene00001718	4.96181	0.102846	0.737761	0.139402	0.889132	0.936221	grl-9
WBGene00001719	274.654	-0.567837	0.597058	-0.951058	0.341575	0.519824	grl-10
WBGene00001720	0.774704	-0.551469	1.87073	-0.294789	0.768155	NA	grl-11
WBGene00001721	16.3194	-0.307691	0.5011	-0.614031	0.539195	0.696523	grl-12
WBGene00001722	8.75151	0.0531177	0.574846	0.0924033	0.926378	0.956857	grl-13
WBGene00001723	66.3423	-0.119718	0.442093	-0.270797	0.786547	0.873951	grl-14
WBGene00001724	993.364	-0.730176	0.720918	-1.01284	0.311136	0.487142	grl-15
WBGene00001725	26243.6	0.0897349	0.202149	0.443906	0.657111	0.784268	grl-16
WBGene00001726	4.19676	-0.165657	0.726972	-0.227872	0.819746	0.894467	grl-17
WBGene00001727	30.3054	-0.21631	0.512262	-0.422264	0.672833	0.795742	grl-18
WBGene00001728	0.443994	-0.969213	2.62019	-0.369902	0.711455	NA	grl-19
WBGene00001729	1.02723	1.33985	1.63354	0.820213	0.412095	NA	grl-20
WBGene00001730	1487.5	0.132586	0.429063	0.309013	0.757312	0.854312	grl-21
WBGene00001731	114.265	0.317328	0.208773	1.51996	0.12852	0.263808	grl-22
WBGene00001732	2.13035	0.197521	1.46261	0.135047	0.892575	NA	grl-23
WBGene00001733	1.51662	0.920349	1.25893	0.731054	0.464746	NA	grl-24
WBGene00001734	4.43331	0.652193	0.732016	0.890956	0.372953	0.550796	grl-25
WBGene00001735	3.71123	0.539335	0.815982	0.660965	0.508635	0.670994	grl-26
WBGene00001736	483.222	-0.160993	0.238957	-0.673733	0.500481	0.664657	grl-27
WBGene00001737	8.24475	-0.0420638	0.682939	-0.0615924	0.950887	0.971951	grl-28
WBGene00001738	0.240599	1.33698	3.60341	0.371031	0.710614	NA	grl-29
WBGene00001739	13.3031	0.0409441	0.551453	0.0742477	0.940813	0.966089	grl-30
WBGene00001740	372.653	0.028391	0.09235	0.307428	0.758517	0.855132	gro-1
WBGene00001743	856.041	0.153962	0.0879833	1.7499	0.0801358	0.186002	grp-1
WBGene00001744	4205.35	-0.528941	0.0838736	-6.30641	2.85587e-10	9.64522e-09	gars-1
WBGene00001745	785.623	-0.104535	0.114385	-0.913886	0.360777	0.538149	gsa-1
WBGene00001746	2474.1	0.0138574	0.0676428	0.204862	0.83768	0.905729	gsk-3
WBGene00001747	5275.21	-0.131263	0.0618718	-2.12153	0.0338773	0.0966831	gsp-1
WBGene00001748	6816.36	0.082499	0.0599153	1.37693	0.168535	0.322495	gsp-2
WBGene00001749	5675.61	-0.790325	0.156582	-5.04736	4.47954e-07	7.36321e-06	gst-1
WBGene00001750	14.4377	-0.211433	0.544255	-0.388481	0.69766	0.813913	gst-2
WBGene00001751	36.1722	0.118099	0.252468	0.467778	0.639943	0.771836	gst-3
WBGene00001752	1130	-0.526183	0.115646	-4.54992	5.36657e-06	6.51199e-05	gst-4
WBGene00001753	702.937	-0.89243	0.185289	-4.81643	1.46151e-06	2.08587e-05	gst-5
WBGene00001754	1383.32	-0.170965	0.0912907	-1.87275	0.0611027	0.150882	gst-6
WBGene00001755	2345.34	-0.153066	0.114777	-1.33359	0.182338	0.34013	gst-7
WBGene00001756	3.63552	-0.147801	0.701961	-0.210554	0.833235	0.903177	gst-8
WBGene00001757	68.6314	-1.51644	0.392483	-3.8637	0.000111681	0.000890673	gst-9
WBGene00001758	5744.75	0.295621	0.130006	2.2739	0.022972	0.0715045	gst-10
WBGene00001759	37.6183	0.0149485	0.242898	0.0615426	0.950927	0.971951	gst-11
WBGene00001760	21.9978	-0.230119	0.327219	-0.703256	0.481896	0.649116	gst-12
WBGene00001761	2498.82	-0.0941135	0.153028	-0.615009	0.538549	0.695988	gst-13
WBGene00001762	2.16365	0.796591	1.01245	0.786794	0.431403	NA	gst-14
WBGene00001763	31.7812	-0.353245	0.26576	-1.32919	0.183786	0.342143	gst-15
WBGene00001764	47.2627	-0.479955	0.21108	-2.2738	0.0229778	0.0715093	gst-16
WBGene00001765	6.87663	-3.67668	0.807009	-4.55594	5.21522e-06	6.36975e-05	gst-17
WBGene00001766	6.85218	-3.37089	0.690168	-4.88415	1.03875e-06	1.55013e-05	gst-18
WBGene00001767	7.61099	-0.482117	0.557925	-0.864126	0.387519	0.565154	gst-19
WBGene00001768	304.462	-0.825964	0.135022	-6.11727	9.51925e-10	2.86677e-08	gst-20
WBGene00001769	27.83	-0.692752	0.273756	-2.53055	0.0113885	0.0410734	gst-21
WBGene00001770	637.554	1.86417	0.179637	10.3774	3.14189e-25	5.51782e-23	gst-22
WBGene00001771	38.5782	0.327674	0.307243	1.0665	0.286199	0.459349	gst-23
WBGene00001772	146.651	2.35624	0.349984	6.73242	1.66861e-11	6.89086e-10	gst-24
WBGene00001773	6.57423	-0.704718	0.652699	-1.0797	0.280277	0.453598	gst-25
WBGene00001774	1349.25	-0.113949	0.102758	-1.10891	0.267468	0.440779	gst-26
WBGene00001775	1427.17	0.234433	0.102474	2.28773	0.0221532	0.0696448	gst-27
WBGene00001776	748.266	-0.0966152	0.148812	-0.649245	0.51618	0.676331	gst-28
WBGene00001777	113.521	0.378702	0.183685	2.0617	0.0392363	0.107934	gst-29
WBGene00001778	12.5629	-0.441236	0.47747	-0.924113	0.355428	0.533402	gst-30
WBGene00001779	5.83749	0.165868	0.615238	0.2696	0.787468	0.874533	gst-31
WBGene00001780	5.73448	0.395082	0.628299	0.628812	0.529472	0.688359	gst-32
WBGene00001781	37.2542	0.297302	0.237808	1.25018	0.211235	0.377371	gst-33
WBGene00001782	7.20263	1.38445	0.704136	1.96617	0.0492792	0.127975	gst-34
WBGene00001783	64.1064	0.399177	0.258102	1.54659	0.121963	0.253814	gst-35
WBGene00001784	1856.1	0.126871	0.0662715	1.91441	0.0555682	0.140066	gst-36
WBGene00001785	0.60689	1.047	1.76667	0.59264	0.553422	NA	gst-37
WBGene00001786	154.654	-0.0890828	0.134182	-0.663897	0.506756	0.669642	gst-38
WBGene00001787	410.772	-0.167616	0.124525	-1.34604	0.178291	0.335316	gst-39
WBGene00001788	56.8724	0.389804	0.186328	2.09203	0.0364361	0.102031	gst-40
WBGene00001789	20.806	1.50363	0.487342	3.08538	0.00203296	0.0101764	gst-41
WBGene00001790	819.244	-0.0104389	0.146701	-0.0711573	0.943273	0.967453	gst-42
WBGene00001791	165.522	-0.297702	0.154374	-1.92845	0.0537996	0.136655	gst-43
WBGene00001792	9.32727	0.83327	0.470069	1.77266	0.0762856	0.179008	gst-44
WBGene00001793	3912.73	-0.170977	0.0462466	-3.69707	0.000218104	0.00156712	gsy-1
WBGene00001794	9894.91	0.0721927	0.0670103	1.07734	0.281329	0.454463	gta-1
WBGene00001795	1940.54	0.128993	0.198665	0.6493	0.516144	0.676331	gtl-1
WBGene00001796	194.64	1.0257	0.149499	6.86088	6.84362e-12	2.94276e-10	gtl-2
WBGene00001803	69.3514	0.292709	0.173997	1.68227	0.0925165	0.206688	lite-1
WBGene00001804	4.08448	0.794073	0.83663	0.949133	0.342553	0.52079	gur-3
WBGene00001805	32.1851	-0.224752	0.296835	-0.75716	0.448954	0.62207	gur-4
WBGene00001806	14.1633	-0.513246	0.368289	-1.3936	0.163439	0.315568	gur-5
WBGene00001808	494.952	-0.192212	0.0735102	-2.61476	0.00892904	0.0338804	gut-2
WBGene00001811	120.539	0.103776	0.171791	0.604081	0.54579	0.701921	haf-1
WBGene00001812	1549.24	0.114983	0.0632469	1.81801	0.0690629	0.165958	haf-2
WBGene00001813	1406.22	-0.222238	0.0630054	-3.52729	0.000419835	0.0027181	haf-3
WBGene00001814	2888.24	0.22001	0.0927875	2.37111	0.0177346	0.0582794	haf-4
WBGene00001815	1336.69	-0.12257	0.0744373	-1.64662	0.099637	0.218643	hmt-1
WBGene00001816	855.016	-0.282756	0.15048	-1.87902	0.0602417	0.149298	haf-6
WBGene00001817	582.881	-1.10188	0.161467	-6.82418	8.84288e-12	3.74453e-10	haf-7
WBGene00001818	0.207626	0.498187	3.73838	0.133263	0.893986	NA	haf-8
WBGene00001819	3745.3	-0.0623842	0.135542	-0.460257	0.645332	0.775812	haf-9
WBGene00001820	37.0155	1.37262	0.265793	5.16425	2.41402e-07	4.27101e-06	ham-1
WBGene00001821	79.6748	0.498182	0.220258	2.26181	0.023709	0.0733793	ham-2
WBGene00001823	369.668	-0.278364	0.0826621	-3.36749	0.000758552	0.0044783	hap-1
WBGene00001824	216.146	0.369071	0.184095	2.00479	0.0449854	0.119645	hbl-1
WBGene00001827	2841.82	0.156957	0.07142	2.19766	0.0279737	0.0833862	hcf-1
WBGene00001828	0.090031	-0.944467	3.81693	-0.247442	0.804566	NA	hch-1
WBGene00001829	3679.42	0.0667512	0.123689	0.539669	0.589426	0.735636	hcp-1
WBGene00001830	3852.71	0.00076514	0.0561317	0.0136311	0.989124	0.99395	hcp-2
WBGene00001831	924.562	0.25572	0.114191	2.2394	0.0251299	0.0768453	hcp-3
WBGene00001832	2271.24	0.0560608	0.0937142	0.598211	0.549699	0.705096	hcp-4
WBGene00001833	1515.7	-0.058351	0.0641497	-0.909607	0.36303	0.540291	hcp-6
WBGene00001834	2389.68	0.321891	0.0783637	4.10765	3.99698e-05	0.000368428	hda-1
WBGene00001835	459.351	0.0747304	0.103744	0.720336	0.471318	0.63915	hda-2
WBGene00001836	823.723	0.0624424	0.102195	0.611011	0.541192	0.698102	hda-3
WBGene00001837	995.203	0.111824	0.0609025	1.83611	0.066341	0.161041	hda-4
WBGene00001838	437.347	0.124649	0.0961758	1.29606	0.194955	0.357222	hda-10
WBGene00001839	367.267	-0.186391	0.110588	-1.68546	0.0919006	0.205677	hdl-1
WBGene00001840	10716.4	-0.225996	0.0478611	-4.72191	2.33643e-06	3.16147e-05	hel-1
WBGene00001841	13.5396	-0.0705511	0.377515	-0.186883	0.851752	0.913864	hen-1
WBGene00001842	1.05404	-0.128878	1.33728	-0.0963733	0.923224	NA	her-1
WBGene00001843	2679.22	0.31844	0.085351	3.73095	0.000190761	0.00139774	hgo-1
WBGene00001844	526.397	0.0496991	0.101448	0.489895	0.624208	0.760497	hid-1
WBGene00001851	4900.05	0.195988	0.0727483	2.69406	0.00705879	0.0279404	hif-1
WBGene00001852	54.9108	0.996296	0.310501	3.20867	0.00133349	0.00716056	hil-1
WBGene00001853	1062.06	0.460532	0.150303	3.06402	0.00218382	0.0107827	hil-2
WBGene00001854	254.715	0.872541	0.435104	2.00536	0.0449244	0.119526	hil-3
WBGene00001855	2376.59	-0.0140376	0.0925721	-0.15164	0.879471	0.930031	hil-4
WBGene00001856	2964.73	-0.156479	0.0754323	-2.07442	0.03804	0.105355	hil-5
WBGene00001857	2.49628	1.95854	1.06591	1.83744	0.0661447	NA	hil-6
WBGene00001858	23.5697	0.681327	0.379003	1.79768	0.0722274	0.171805	hil-7
WBGene00001859	28.3821	-0.766994	0.284159	-2.69917	0.00695131	0.0276528	hil-8
WBGene00001860	3658.89	-0.0547764	0.0536837	-1.02035	0.30756	0.483313	him-1
WBGene00001862	1619.71	-0.111708	0.0709896	-1.57358	0.115585	0.243826	him-3
WBGene00001863	6520.25	0.0809947	0.0847665	0.955503	0.339323	0.517389	him-4
WBGene00001864	250.792	0.235783	0.208888	1.12875	0.259004	0.431302	him-5
WBGene00001865	902.223	-0.0240688	0.082108	-0.293135	0.769419	0.862669	him-6
WBGene00001867	501.505	-0.0533001	0.168033	-0.317201	0.751091	0.85066	him-8
WBGene00001869	943.823	0.223977	0.110005	2.03607	0.0417432	0.113114	him-10
WBGene00001872	533.857	-0.0154815	0.0987555	-0.156765	0.87543	0.927285	him-14
WBGene00001874	1926.37	0.102215	0.0737658	1.38567	0.165847	0.318484	him-17
WBGene00001875	16.8392	0.803108	0.470496	1.70694	0.0878336	0.198889	his-1
WBGene00001876	18.1175	0.397989	0.664142	0.599253	0.549004	0.704638	his-2
WBGene00001877	267.385	0.877368	0.540988	1.62179	0.104849	0.226828	his-3
WBGene00001878	52.7089	0.781597	0.391537	1.99623	0.0459089	0.121513	his-4
WBGene00001879	75.7044	0.17849	0.49398	0.361331	0.717852	0.828031	his-5
WBGene00001880	48.5557	-0.454473	0.36632	-1.24065	0.214736	0.380862	his-6
WBGene00001881	95.6221	0.709089	0.471003	1.50549	0.132199	0.269634	his-7
WBGene00001882	60.9074	0.61554	0.494021	1.24598	0.212772	0.378534	his-8
WBGene00001883	183.003	0.782944	0.345729	2.26462	0.0235359	0.0729468	his-9
WBGene00001884	180.268	1.51261	0.241605	6.26066	3.83351e-10	1.25555e-08	his-10
WBGene00001885	293.295	1.19569	0.181344	6.59348	4.29641e-11	1.65164e-09	his-11
WBGene00001886	112.314	0.995977	0.183192	5.4368	5.42461e-08	1.12848e-06	his-12
WBGene00001889	3.83126	0	3.81693	0	NA	NA	his-15
WBGene00001890	13.0478	5.99525	2.09822	2.8573	0.00427266	0.0186464	his-16
WBGene00001891	155.908	0.773622	0.466984	1.65663	0.0975934	0.215206	his-17
WBGene00001892	77.949	0.966086	0.468858	2.06051	0.0393499	0.108086	his-18
WBGene00001893	518.693	1.32752	0.498281	2.6642	0.00771705	0.0300787	his-19
WBGene00001894	155.221	1.09177	0.450959	2.421	0.015478	0.0524016	his-20
WBGene00001898	358.91	0.2788	0.314244	0.887209	0.374966	0.552449	his-24
WBGene00001899	123.84	1.12941	0.236116	4.78329	1.72449e-06	2.41168e-05	his-25
WBGene00001901	0	NA	NA	NA	NA	NA	his-27
WBGene00001902	46.2196	1.35176	0.556878	2.4274	0.0152077	0.0516751	his-28
WBGene00001903	1.37177	0.206456	1.45909	0.141497	0.887477	NA	his-29
WBGene00001904	0.513659	-0.512045	2.53486	-0.202001	0.839916	NA	his-30
WBGene00001905	1.92266	1.15259	1.22764	0.938871	0.347797	NA	his-31
WBGene00001906	14.024	2.21122	0.499923	4.42312	9.72868e-06	0.000108498	his-32
WBGene00001909	1397.66	-0.257104	0.0876285	-2.93402	0.00334603	0.0152403	his-35
WBGene00001910	95.9689	0.269455	0.165602	1.62713	0.10371	0.224889	C50F4.6
WBGene00001911	1918.38	0.296841	0.0970636	3.05821	0.00222665	0.0109488	his-37
WBGene00001912	85.1894	0.305582	0.2125	1.43803	0.150424	0.297074	his-38
WBGene00001913	0	NA	NA	NA	NA	NA	his-39
WBGene00001914	59.1266	-0.23053	0.224761	-1.02566	0.30505	0.480817	his-40
WBGene00001915	1407.85	-0.294953	0.125795	-2.34471	0.0190417	0.0617813	his-41
WBGene00001916	0	NA	NA	NA	NA	NA	his-42
WBGene00001919	42.0274	0.936467	0.507426	1.84553	0.064961	0.15829	his-45
WBGene00001920	64.1817	1.6727	0.540594	3.09418	NA	NA	his-46
WBGene00001921	4.79892	-0.333565	1.63477	-0.204044	0.838319	0.906097	his-47
WBGene00001922	156.934	1.0978	0.181627	6.04425	1.50107e-09	4.36303e-08	his-48
WBGene00001928	1.1665	2.76251	2.95456	0.934997	0.34979	NA	his-54
WBGene00001929	84.6398	1.41284	0.444411	3.17913	0.00147715	0.00779915	his-55
WBGene00001931	175.406	0.175402	0.144983	1.20981	0.226352	0.394326	his-57
WBGene00001932	86.3115	0.806933	1.79794	0.44881	0.653569	0.781603	his-58
WBGene00001933	163.651	0.911476	0.265324	3.43534	0.000591817	0.0036261	his-59
WBGene00001934	193.172	0.932015	0.250776	3.71652	0.000201983	0.00146708	his-60
WBGene00001935	107.339	0.649377	0.191766	3.38629	0.000708433	0.0042288	his-61
WBGene00001936	74.4601	0.815806	0.294528	2.76988	0.0056077	0.0232444	his-62
WBGene00001937	14.9828	1.74795	0.699337	2.49944	0.0124389	0.044043	his-63
WBGene00001938	52.8145	1.74321	0.373256	4.67028	3.00794e-06	3.95465e-05	his-64
WBGene00001939	54.0771	2.58137	0.616209	4.18911	2.80055e-05	0.000271728	his-65
WBGene00001940	118.421	1.60219	0.365961	4.37804	1.19754e-05	0.000130757	his-66
WBGene00001941	24.4665	0.745845	0.312205	2.38896	0.016896	0.0561317	his-67
WBGene00001942	170.402	0.0296269	0.145576	0.203515	0.838733	0.906168	his-68
WBGene00001943	2.14466	-0.714185	0.918855	-0.777256	0.437008	NA	his-69
WBGene00001944	273.236	-1.20922	0.21822	-5.54127	3.00283e-08	6.70671e-07	his-70
WBGene00001945	1435.24	0.176112	0.119911	1.46868	0.141919	0.28411	his-71
WBGene00001946	2375.16	0.186499	0.107903	1.72839	0.0839181	0.192399	his-72
WBGene00001947	14.0987	-0.792234	0.435124	-1.82071	0.0686509	0.165311	his-73
WBGene00001948	96.016	-0.347904	0.17613	-1.97527	0.0482375	0.126022	hlh-1
WBGene00001949	88.3532	0.843024	0.219769	3.83595	0.000125079	0.000976172	hlh-2
WBGene00001950	6.10919	1.39602	0.671862	2.07784	0.0377239	0.104863	hlh-3
WBGene00001951	16.3231	-0.0787932	0.384681	-0.204827	0.837707	0.905729	hlh-4
WBGene00001952	9.26327	0.164154	0.54688	0.300164	0.764052	0.858876	hlh-6
WBGene00001953	23.495	-0.0309436	0.358898	-0.0862182	0.931293	0.960033	hlh-8
WBGene00001954	7.70491	0.49015	0.560539	0.874427	0.381886	0.559089	hlh-10
WBGene00001955	2246.52	0.514198	0.103561	4.96515	6.86484e-07	1.06949e-05	hlh-11
WBGene00001956	4.51864	-0.126184	0.713784	-0.176783	0.859679	0.91818	hlh-12
WBGene00001957	1.65386	1.6484	1.12583	1.46416	0.143151	NA	hlh-13
WBGene00001958	1.24	-2.90787	1.49781	-1.94142	0.0522073	NA	hlh-14
WBGene00001959	0.898045	0.201487	1.30994	0.153814	0.877756	NA	hlh-15
WBGene00001960	4.53616	1.11558	0.679597	1.64153	0.100688	0.220342	hlh-16
WBGene00001961	3.78857	-0.253911	0.739757	-0.343236	0.731421	0.836717	hlh-17
WBGene00001962	5.10013	0.0276931	0.676778	0.040919	0.96736	0.98124	hlh-19
WBGene00001963	24.0131	-0.105316	0.267386	-0.393871	0.693676	0.810511	btb-1
WBGene00001964	0	NA	NA	NA	NA	NA	hlh-25
WBGene00001965	0	NA	NA	NA	NA	NA	hlh-26
WBGene00001966	0	NA	NA	NA	NA	NA	hlh-27
WBGene00001967	0	NA	NA	NA	NA	NA	hlh-28
WBGene00001968	0.525085	1.08384	2.13966	0.50655	0.61247	NA	hlh-29
WBGene00001971	5394.94	0.076499	0.0773747	0.988682	0.322819	0.499992	hmg-1.1
WBGene00001972	1957.51	0.138972	0.0587517	2.36542	0.0180097	0.0590787	hmg-1.2
WBGene00001973	2468.97	0.00641315	0.068278	0.0939271	0.925167	0.956172	hmg-3
WBGene00001974	1575.01	0.194161	0.071124	2.7299	0.00633532	0.0256115	hmg-4
WBGene00001975	863.138	-0.0299154	0.118541	-0.252364	0.800759	0.883398	hmg-5
WBGene00001976	321.108	-0.166912	0.215641	-0.774026	0.438915	0.613254	hmg-11
WBGene00001977	3081.25	-0.0743776	0.0779498	-0.954173	0.339996	0.517988	hmg-12
WBGene00001978	1744.8	0.288341	0.0694571	4.15136	3.3051e-05	0.000312598	hmp-1
WBGene00001979	1413.76	0.286189	0.0698848	4.09516	4.21883e-05	0.000385259	hmp-2
WBGene00001980	3639.49	0.0923087	0.139981	0.659438	0.509614	0.671755	hmr-1
WBGene00001981	1.63429	3.74726	1.32471	2.82875	0.00467305	NA	hnd-1
WBGene00001983	2462.18	-0.367425	0.091255	-4.02635	5.66483e-05	0.000495836	hoe-1
WBGene00001984	322.379	-0.446467	0.294283	-1.51714	0.129232	0.264846	hog-1
WBGene00001985	334.262	0.274354	0.142201	1.92933	0.0536894	0.136423	hop-1
WBGene00001986	196.152	0.186881	0.122852	1.52119	0.128211	0.2634	hot-1
WBGene00001987	35.4479	0.354449	0.330112	1.07372	0.282947	0.456194	hot-2
WBGene00001988	13.7083	0.0787513	0.371792	0.211816	0.832251	0.902422	hot-3
WBGene00001989	50.6866	0.306636	0.214192	1.4316	0.152259	0.29962	hot-4
WBGene00001990	86.091	-0.140754	0.191224	-0.736069	0.461689	0.631741	hot-5
WBGene00001991	127.732	0.233886	0.135981	1.71999	0.0854343	0.194831	hot-6
WBGene00001992	14.6559	0.176112	0.399933	0.440353	0.659681	0.785983	hot-7
WBGene00001993	4996.1	-0.0871088	0.102545	-0.849472	0.395619	0.572811	hpd-1
WBGene00001994	1898.91	0.0444996	0.0680094	0.654315	0.512909	0.67401	hpk-1
WBGene00001995	95.725	0.223614	0.15535	1.43942	0.150033	0.296405	hpl-1
WBGene00001996	1117.5	-0.054131	0.089211	-0.606775	0.544	0.700587	hpl-2
WBGene00001997	401.222	0.0305578	0.100873	0.302934	0.76194	0.857426	hpr-9
WBGene00001998	499.572	0.203553	0.103494	1.96682	0.0492045	0.12791	hpr-17
WBGene00001999	7187.27	-0.219667	0.059996	-3.66137	0.000250871	0.00176381	hrp-1
WBGene00002000	7414.61	-0.0202027	0.0694222	-0.291011	0.771043	0.863825	hrp-2
WBGene00002001	2251.22	-0.265601	0.0440457	-6.03013	1.63832e-09	4.72902e-08	hars-1
WBGene00002002	1044.91	-0.0660769	0.0654421	-1.0097	0.312639	0.488854	hsb-1
WBGene00002003	779.514	0.0547167	0.0721803	0.758056	0.448417	0.621678	hse-5
WBGene00002004	1139.29	0.044654	0.076369	0.584714	0.55874	0.712257	hsf-1
WBGene00002005	63274	-0.427434	0.0903342	-4.7317	2.22644e-06	3.03232e-05	hsp-1
WBGene00002006	7.20694	0.252341	0.510812	0.494	0.621306	0.759154	hsp-2
WBGene00002007	30556.8	-0.500513	0.106343	-4.70659	2.51894e-06	3.37288e-05	hsp-3
WBGene00002008	16875.2	-0.638569	0.265152	-2.40832	0.0160262	0.0539029	hsp-4
WBGene00002010	16843	-0.794984	0.0687303	-11.5667	6.07591e-31	1.68951e-28	hsp-6
WBGene00002011	1541.48	-0.113892	0.0805255	-1.41436	0.157256	0.306968	hsp-12.2
WBGene00002012	11.3805	-0.387829	0.397487	-0.975704	0.329211	0.506274	hsp-12.3
WBGene00002013	2.47671	0.826889	0.950193	0.870233	0.384173	NA	hsp-12.6
WBGene00002015	768.447	-1.80535	0.800209	-2.25609	0.0240648	0.0741752	hsp-16.1
WBGene00002016	330.236	-1.45436	0.80887	-1.79801	0.0721753	0.171712	hsp-16.2
WBGene00002017	12.6616	-1.70002	0.73993	-2.29754	0.021588	0.0682017	hsp-16.11
WBGene00002018	379.648	-2.49139	0.823542	-3.02521	0.00248461	0.0119565	hsp-16.41
WBGene00002019	1083.37	-2.58237	0.72201	-3.57665	0.00034803	0.00232633	hsp-16.48
WBGene00002021	1648.07	0.102101	0.290917	0.350963	0.725616	0.832956	hsp-17
WBGene00002023	3160.32	0.0571925	0.104659	0.546464	0.584747	0.732867	hsp-25
WBGene00002024	1462.48	0.334272	0.227202	1.47125	0.141223	0.283227	hsp-43
WBGene00002025	9640.1	-1.24404	0.0619717	-20.0744	1.23564e-89	5.15385e-86	hsp-60
WBGene00002026	114.56	-0.394389	0.735459	-0.536248	0.591787	0.737481	hsp-70
WBGene00002027	6107.84	0.0797491	0.0899179	0.88691	0.375127	0.552541	hsr-9
WBGene00002028	660.871	0.125501	0.0849645	1.4771	0.139648	0.280777	hst-1
WBGene00002029	100.6	0.204414	0.15255	1.33999	0.18025	0.337443	hst-2
WBGene00002030	39.8615	0.0251047	0.23062	0.108857	0.913316	0.949985	hst-3.1
WBGene00002031	94.2709	0.237796	0.150612	1.57886	0.114368	0.24233	hst-6
WBGene00002032	1530.89	0.0217421	0.0756876	0.287261	0.773912	0.865683	htp-1
WBGene00002033	935.616	-0.00720784	0.0877408	-0.0821492	0.934528	0.961855	htp-2
WBGene00002034	1607.31	-0.132718	0.0701926	-1.89077	0.0586552	0.14593	htp-3
WBGene00002035	2238.28	0.569635	0.098018	5.81154	6.19008e-09	1.59869e-07	hum-1
WBGene00002036	4811.02	0.222878	0.0775462	2.87413	0.00405141	0.0178489	hum-2
WBGene00002037	2280.38	-0.13715	0.103551	-1.32446	0.18535	0.344171	hum-4
WBGene00002038	4252.27	0.379808	0.0503208	7.54773	4.42923e-14	2.56588e-12	hum-5
WBGene00002039	1186.08	-0.262897	0.210862	-1.24677	0.212482	0.3783	hum-6
WBGene00002040	965.599	0.171675	0.0558578	3.07342	0.00211618	0.0105016	hum-7
WBGene00002041	2481.32	0.401858	0.0831283	4.83419	1.3369e-06	1.92782e-05	hum-8
WBGene00002042	239.37	0.0425094	0.109166	0.389403	0.696978	0.813288	hus-1
WBGene00002043	2026.95	0.725018	0.0718491	10.0908	6.06468e-24	9.28286e-22	hyl-1
WBGene00002044	1371.8	0.140815	0.0755282	1.86441	0.0622645	0.15306	hyl-2
WBGene00002045	26760.4	-0.251782	0.0453388	-5.55334	2.80264e-08	6.30179e-07	icd-1
WBGene00002046	1090.89	-0.411497	0.0812444	-5.06492	4.08566e-07	6.81652e-06	icln-1
WBGene00002047	1069.25	0.0860977	0.0879736	0.978676	0.32774	0.504957	icp-1
WBGene00002048	1980.48	0.317736	0.0734706	4.32467	1.52758e-05	0.000161814	ida-1
WBGene00002050	3846.59	0.148092	0.105567	1.40283	0.160667	0.311984	ifa-1
WBGene00002051	12.75	0.411058	0.421096	0.976163	0.328984	0.506017	ifa-3
WBGene00002052	3815.47	0.171452	0.141208	1.21418	0.224677	0.392433	ifa-4
WBGene00002053	9955	0.102663	0.0588479	1.74455	0.0810628	0.18753	ifb-1
WBGene00002054	14885.2	0.606805	0.123794	4.90173	9.49965e-07	1.42786e-05	ifb-2
WBGene00002055	935.613	0.242	0.182625	1.32512	0.185131	0.34388	ifc-1
WBGene00002056	14808.3	0.577693	0.1443	4.00342	6.24323e-05	0.000538862	ifc-2
WBGene00002057	2105.56	0.391779	0.0757331	5.17315	2.30178e-07	4.09849e-06	ifd-1
WBGene00002058	1500.28	1.03625	0.101055	10.2543	1.1322e-24	1.87026e-22	ifd-2
WBGene00002059	5411.56	-0.393684	0.0677466	-5.81112	6.20545e-09	1.60018e-07	ife-1
WBGene00002060	1164.44	-0.244241	0.122367	-1.99597	0.0459377	0.121554	ife-2
WBGene00002061	4819.39	0.0594319	0.0783518	0.758527	0.448136	0.621453	ife-3
WBGene00002062	211.809	-0.185675	0.127455	-1.45679	0.145173	0.289192	ife-4
WBGene00002063	190.467	-0.483886	0.131652	-3.67549	0.00023739	0.00167965	ife-5
WBGene00002064	15188.3	-0.374812	0.0696899	-5.37829	7.51969e-08	1.51337e-06	iff-1
WBGene00002065	8547.18	-0.0598968	0.122316	-0.489687	0.624355	0.760513	iff-2
WBGene00002066	12837.4	-0.385602	0.0562169	-6.85918	6.92593e-12	2.97049e-10	ifg-1
WBGene00002067	2132.7	0.188411	0.0975569	1.93129	0.0534469	0.13595	ifp-1
WBGene00002068	2058.97	0.084771	0.116584	0.727121	0.467152	0.635846	ify-1
WBGene00002069	253.492	0.405231	0.152623	2.65512	0.00792803	0.0307464	ikb-1
WBGene00002070	5625.15	-0.187399	0.0773245	-2.42354	0.0153702	0.0521424	ile-1
WBGene00002071	1476.04	-0.366048	0.113507	-3.22489	0.00126021	0.00683383	ile-2
WBGene00002072	1250.51	0.227426	0.134113	1.69578	0.0899274	0.202476	ima-1
WBGene00002073	4755.25	0.0741974	0.1309	0.566827	0.570832	0.721497	ima-2
WBGene00002074	6812.1	-0.0897154	0.0642411	-1.39654	0.162551	0.314362	ima-3
WBGene00002075	2355.43	-0.273609	0.0656938	-4.16491	3.11477e-05	0.000296783	imb-1
WBGene00002076	2863.4	-0.196912	0.0963027	-2.04472	0.0408823	0.111412	imb-2
WBGene00002077	14475.3	-0.333311	0.0876903	-3.801	0.000144114	0.00110091	imb-3
WBGene00002078	6831.83	-0.200277	0.0529334	-3.78356	0.000154601	0.00117138	xpo-1
WBGene00002079	3234.63	0.0157128	0.0788687	0.199228	0.842085	0.908343	xpo-2
WBGene00002080	2704.48	-0.112218	0.0681692	-1.64617	0.0997288	0.218816	xpo-3
WBGene00002081	1861.82	0.0602024	0.111146	0.541653	0.588058	0.735069	ina-1
WBGene00002083	17087.9	-0.545841	0.0609351	-8.95773	3.31419e-19	3.4344e-17	inf-1
WBGene00002084	88.7633	0.22712	0.164976	1.37669	0.168609	0.322582	ins-1
WBGene00002085	2.43857	0.331053	0.91099	0.3634	0.716306	NA	ins-2
WBGene00002086	55.3181	0.057833	0.227178	0.254571	0.799055	0.882149	ins-3
WBGene00002087	73.7721	-0.0279276	0.238335	-0.117178	0.906719	0.946073	ins-4
WBGene00002088	91.2176	-0.144481	0.190619	-0.757958	0.448476	0.621678	ins-5
WBGene00002089	107.189	-0.233844	0.16859	-1.38706	0.165424	0.317928	ins-6
WBGene00002090	98.6345	1.07219	0.19488	5.50179	3.75959e-08	8.18865e-07	ins-7
WBGene00002091	0.337287	0.599352	2.69952	0.222022	0.824297	NA	ins-8
WBGene00002092	12.4153	-1.72538	0.74308	-2.32193	0.0202368	0.0649792	ins-9
WBGene00002093	9.77881	0.510234	0.449204	1.13586	0.256014	0.427818	ins-10
WBGene00002094	10.8132	1.22007	0.434714	2.80661	0.00500656	0.0212381	ins-11
WBGene00002095	22.9386	0.975338	0.320994	3.03849	0.00237767	0.0115384	ins-12
WBGene00002096	0.0579952	0.498196	3.81693	0.130523	0.896153	NA	ins-13
WBGene00002097	15.2133	0.0842066	0.42861	0.196464	0.844247	0.909224	ins-14
WBGene00002098	0.159542	-0.944473	3.81693	-0.247443	0.804565	NA	ins-15
WBGene00002099	0.781793	1.7652	1.66135	1.06251	0.288004	NA	ins-16
WBGene00002100	232.13	0.378058	0.117257	3.22417	0.00126336	0.00684349	ins-17
WBGene00002101	77.2275	0.38313	0.185718	2.06297	0.0391157	0.107673	ins-18
WBGene00002102	0.357952	-0.94448	2.63552	-0.358366	0.72007	NA	ins-19
WBGene00002103	11.6632	1.29218	0.475004	2.72036	0.00652112	0.0262354	ins-20
WBGene00002104	2.41328	1.1566	1.08395	1.06702	0.285961	NA	ins-21
WBGene00002105	32.5533	-0.290468	0.273363	-1.06257	0.287977	0.461333	ins-22
WBGene00002106	12.5081	-0.258679	0.395257	-0.654458	0.512816	0.674006	ins-23
WBGene00002107	20.9718	-0.0321451	0.360254	-0.0892289	0.9289	0.958337	ins-24
WBGene00002108	1.11693	0.354486	1.67238	0.211965	0.832135	NA	ins-25
WBGene00002109	92.4398	-0.0880893	0.16173	-0.54467	0.585981	0.733795	ins-26
WBGene00002110	248.663	-0.269367	0.200127	-1.34598	0.17831	0.335316	ins-27
WBGene00002111	54.1588	0.232308	0.222128	1.04583	0.295641	0.470072	ins-28
WBGene00002112	19.827	0.015883	0.33662	0.0471839	0.962367	0.978174	ins-29
WBGene00002113	36.7758	-0.0253778	0.240921	-0.105336	0.916109	0.951408	ins-30
WBGene00002114	0.161754	-0.944473	3.81693	-0.247443	0.804565	NA	ins-31
WBGene00002115	3.53214	-0.492711	0.911564	-0.540511	0.588845	NA	ins-32
WBGene00002116	78.398	-0.207119	0.231666	-0.894039	0.371301	0.549084	ins-33
WBGene00002117	7.91324	0.871395	0.573476	1.5195	0.128637	0.263951	ins-34
WBGene00002118	12.1918	-0.0390306	0.599454	-0.0651103	0.948086	0.970302	ins-35
WBGene00002119	1.71384	-0.319614	1.43239	-0.223133	0.823432	NA	ins-36
WBGene00002120	285.526	0.523815	0.100441	5.21514	1.83678e-07	3.38243e-06	ins-37
WBGene00002121	0.084265	0.498196	3.81693	0.130523	0.896153	NA	ins-38
WBGene00002123	572.411	0.0409076	0.126592	0.323146	0.746585	0.847521	inx-1
WBGene00002124	62.3315	1.13004	0.35161	3.2139	0.00130947	0.00705431	inx-2
WBGene00002125	190.761	0.594646	0.302331	1.96687	0.049198	0.12791	inx-3
WBGene00002127	1158.98	-0.15371	0.0681316	-2.25608	0.0240656	0.0741752	inx-5
WBGene00002128	171.402	0.00398395	0.130516	0.0305246	0.975649	0.985931	inx-6
WBGene00002129	277.199	0.470492	0.116893	4.02498	5.69798e-05	0.000497463	inx-7
WBGene00002130	904.955	-0.0757002	0.170602	-0.443723	0.657243	0.78431	inx-8
WBGene00002131	496.165	0.198846	0.0976325	2.03668	0.0416826	0.112986	inx-9
WBGene00002132	350.284	-0.0854917	0.118636	-0.720624	0.471141	0.638962	inx-10
WBGene00002133	218.86	0.21601	0.137449	1.57156	0.116051	0.244532	inx-11
WBGene00002134	2285.71	-0.116853	0.0536505	-2.17804	0.0294033	0.0864736	inx-12
WBGene00002135	2070.93	-0.00980857	0.0567136	-0.172949	0.862691	0.920042	inx-13
WBGene00002136	1213.63	0.282765	0.136943	2.06484	0.0389377	0.107378	inx-14
WBGene00002137	2583.63	0.25628	0.0616657	4.15595	3.23933e-05	0.000306551	inx-15
WBGene00002138	2465.28	0.403478	0.0661426	6.10013	1.05985e-09	3.14635e-08	inx-16
WBGene00002139	1040.73	0.1221	0.0625006	1.95358	0.0507509	0.13072	inx-17
WBGene00002140	220.382	0.00672807	0.127946	0.0525853	0.958062	0.975843	inx-18
WBGene00002141	26.0153	0.190932	0.280352	0.681043	0.495844	0.660598	inx-19
WBGene00002142	40.056	-0.0552343	0.278959	-0.198002	0.843044	0.908672	inx-20
WBGene00002143	597.71	0.0278463	0.0767272	0.362926	0.71666	0.827124	inx-21
WBGene00002144	840.94	0.595498	0.192712	3.0901	0.00200091	0.0100764	inx-22
WBGene00002146	513.94	0.16464	0.0939516	1.75239	0.0797073	0.185274	ipp-5
WBGene00002147	2261.9	-0.0897927	0.074417	-1.20662	0.22758	0.395467	ire-1
WBGene00002148	1601.06	0.160239	0.0990765	1.61733	0.105807	0.228503	gon-14
WBGene00002149	55.8455	0.413725	0.249444	1.65859	0.0971987	0.214506	irk-1
WBGene00002150	70.0481	0.0786894	0.17704	0.444473	0.656701	0.783943	irk-2
WBGene00002151	77.4497	0.555931	0.190433	2.91929	0.00350826	0.0158666	irk-3
WBGene00002152	7753.91	-0.308767	0.0453062	-6.81511	9.41948e-12	3.96855e-10	iars-1
WBGene00002153	2284.34	-0.731727	0.0968818	-7.55278	4.26054e-14	2.47675e-12	iars-2
WBGene00002162	12880.7	0.330487	0.073523	4.49501	6.95653e-06	8.118e-05	isp-1
WBGene00002163	153.465	0.174247	0.180123	0.967376	0.333356	0.510863	ist-1
WBGene00002169	2636.98	0.0800666	0.0744423	1.07555	0.282127	0.4552	isw-1
WBGene00002173	5128.97	-0.185369	0.0657751	-2.81823	0.00482893	0.0206421	itr-1
WBGene00002174	3117.28	0.504621	0.082101	6.14634	7.929e-10	2.42258e-08	itx-1
WBGene00002175	1063.66	0.19367	0.0849574	2.27961	0.0226305	0.0708124	jac-1
WBGene00002176	149.038	-0.0861188	0.124954	-0.689205	0.490694	0.65641	jip-1
WBGene00002177	26.2541	0.773622	0.31688	2.44137	0.0146315	0.0501153	jkk-1
WBGene00002178	162.59	0.23873	0.133694	1.78564	0.0741577	0.175272	jnk-1
WBGene00002179	2047.26	0.186451	0.0789638	2.36122	0.0182148	0.0596516	jph-1
WBGene00002180	343.343	0.300661	0.0999807	3.00719	0.00263674	0.012551	jtr-1
WBGene00002181	139.371	0.324596	0.185301	1.75172	0.0798214	0.185428	kal-1
WBGene00002182	87.0353	0.205423	0.16289	1.26111	0.207268	0.372677	kap-1
WBGene00002183	3490.2	-0.13358	0.0632516	-2.11189	0.0346962	0.0983471	kat-1
WBGene00002184	81.6074	-0.0370417	0.209953	-0.176429	0.859957	0.9183	kel-1
WBGene00002185	709.989	0.18137	0.0656287	2.76358	0.0057171	0.0236158	kel-3
WBGene00002186	1364.01	-0.394456	0.0929464	-4.24391	2.19658e-05	0.000221436	kel-10
WBGene00002187	1415.57	0.0369274	0.0923864	0.399706	0.689373	0.807633	kgb-1
WBGene00002188	99.2393	-0.019458	0.218152	-0.0891948	0.928927	0.958337	kgb-2
WBGene00002189	3510.91	0.191966	0.0498146	3.8536	0.000116393	0.000920982	kin-1
WBGene00002190	4665.58	0.160535	0.0608218	2.63943	0.00830454	0.0319173	kin-2
WBGene00002191	5649.35	-0.169753	0.0520018	-3.26437	0.0010971	0.00609929	kin-3
WBGene00002192	3839.32	0.293336	0.0697683	4.20443	2.61739e-05	0.000256873	kin-4
WBGene00002193	549.094	-0.190877	0.0993344	-1.92156	0.0546606	0.138307	kin-5
WBGene00002194	0.14226	1.14781	3.80789	0.30143	0.763087	NA	kin-6
WBGene00002195	81.2353	0.375344	0.182774	2.05359	0.0400151	0.109585	kin-9
WBGene00002196	4004.39	-0.26451	0.0500535	-5.28455	1.26012e-07	2.4249e-06	kin-10
WBGene00002198	524.345	-0.258176	0.101086	-2.55401	0.010649	0.0389709	kin-14
WBGene00002199	141.078	-0.597377	0.319647	-1.86887	0.0616413	0.151864	kin-15
WBGene00002200	287.456	0.0439524	0.305271	0.143978	0.885518	0.934003	kin-16
WBGene00002201	3189.71	0.252861	0.0819661	3.08495	0.00203588	0.0101849	kin-18
WBGene00002202	8954.57	-0.0635992	0.0628073	-1.01261	0.311247	0.487271	kin-19
WBGene00002203	1598.6	-0.0102306	0.0969631	-0.105511	0.915971	0.951343	kin-20
WBGene00002204	224.288	-0.32736	0.123201	-2.65713	0.00788096	0.0306066	kin-21
WBGene00002205	2.58551	-0.675636	1.23475	-0.547183	0.584253	NA	kin-23
WBGene00002206	253.535	-0.530559	0.126316	-4.20025	2.66623e-05	0.000261206	kin-24
WBGene00002207	1677.09	0.328933	0.0777863	4.22868	2.35066e-05	0.000235263	sid-3
WBGene00002208	239.932	-0.356921	0.117074	-3.04869	0.00229844	0.0112192	kin-26
WBGene00002210	1161.74	0.0314025	0.0602363	0.521322	0.602143	0.745224	kin-29
WBGene00002211	32.0567	0.362099	0.290101	1.24818	0.211964	0.377844	kin-30
WBGene00002212	226.958	-0.392473	0.15331	-2.55999	0.0104676	0.0384381	kin-31
WBGene00002213	368.931	0.194661	0.0929411	2.09445	0.0362195	0.101595	kin-32
WBGene00002214	1671.74	0.0251428	0.103547	0.242815	0.808149	0.888043	klc-1
WBGene00002215	1640.01	-0.1968	0.0795232	-2.47475	0.013333	0.0465176	klc-2
WBGene00002216	683.914	-0.0311272	0.0717092	-0.434075	0.664234	0.789153	klp-3
WBGene00002217	2729.11	0.279101	0.0747907	3.73176	0.000190147	0.00139552	klp-4
WBGene00002218	9.89243	-0.0714804	0.506206	-0.141208	0.887706	0.935216	klp-6
WBGene00002219	2395.01	0.022892	0.081606	0.280518	0.77908	0.869042	klp-7
WBGene00002220	399.567	-0.0275852	0.0862107	-0.319974	0.748988	0.849143	gcc-1
WBGene00002221	1088.28	-0.079443	0.146107	-0.543732	0.586626	0.734127	klp-10
WBGene00002222	270.389	-0.125565	0.207677	-0.604614	0.545435	0.701731	klp-11
WBGene00002223	4322.97	-0.115815	0.0705172	-1.64236	0.100516	0.220022	klp-12
WBGene00002224	41.6138	0.0958613	0.240062	0.399318	0.689659	0.807854	klp-13
WBGene00002225	2177.46	0.218457	0.177024	1.23405	0.217184	0.383906	klp-15
WBGene00002226	2028.86	0.233113	0.15982	1.4586	0.144675	0.288416	klp-16
WBGene00002227	320.277	-0.30118	0.127442	-2.36328	0.0181142	0.0593513	klp-17
WBGene00002228	2449.43	-0.0297105	0.0984265	-0.301855	0.762763	0.858121	klp-18
WBGene00002229	3498.36	0.178469	0.0948076	1.88243	0.0597775	0.148324	klp-19
WBGene00002230	228.675	-0.0851226	0.123127	-0.691341	0.489351	0.655349	klp-20
WBGene00002231	2135.55	-0.123016	0.0644717	-1.90806	0.056383	0.141692	knl-1
WBGene00002232	910.681	0.221724	0.188949	1.17346	0.240611	0.410675	kpc-1
WBGene00002233	43.0767	0.0379537	0.229011	0.165729	0.86837	0.92383	kqt-1
WBGene00002234	686.52	0.213805	0.075452	2.83366	0.00460187	0.0198906	kqt-2
WBGene00002235	275.204	0.530065	0.115403	4.59317	4.36573e-06	5.48891e-05	kqt-3
WBGene00002238	9475.07	-0.265338	0.0586076	-4.52737	5.97221e-06	7.12226e-05	kars-1
WBGene00002239	408.176	0.157313	0.0805272	1.95354	0.0507555	0.13072	ksr-1
WBGene00002240	746.693	0.0838183	0.091944	0.911624	0.361967	0.539018	ksr-2
WBGene00002241	1168.12	0.1165	0.0846686	1.37595	0.168837	0.32283	kup-1
WBGene00002242	71.5483	0.22535	0.185163	1.21704	0.22359	0.390903	kvs-1
WBGene00002243	232.781	0.210722	0.175894	1.19801	0.230915	0.399356	lad-2
WBGene00002244	4699.75	-0.386991	0.0598651	-6.46439	1.01708e-10	3.67294e-09	laf-1
WBGene00002245	1053.33	0.241464	0.103213	2.33947	0.0193109	0.0624693	lag-1
WBGene00002246	17.9257	-0.0468703	0.358295	-0.130815	0.895922	0.939835	lag-2
WBGene00002247	7203.22	-0.0784959	0.13006	-0.603537	0.546151	0.702002	lam-1
WBGene00002248	314.982	-0.181816	0.30784	-0.59062	0.554775	0.709224	lam-3
WBGene00002249	4113.73	-0.388229	0.0687845	-5.64414	1.66012e-08	3.93429e-07	lap-1
WBGene00002250	8676.01	0.00396309	0.0516156	0.0767809	0.938798	0.964839	lap-2
WBGene00002251	3162.93	0.349203	0.0671469	5.20058	1.98671e-07	3.63445e-06	lat-1
WBGene00002252	219.405	0.0821613	0.201182	0.408394	0.682985	0.803138	lat-2
WBGene00002253	553.293	-0.26824	0.103788	-2.5845	0.00975215	0.0363749	lbp-1
WBGene00002254	5462.52	0.124311	0.0918791	1.35298	0.176061	0.332474	lbp-2
WBGene00002255	2197.24	-0.707769	0.134366	-5.26746	1.38321e-07	2.64045e-06	lbp-3
WBGene00002256	539.304	-0.325969	0.104507	-3.11912	0.00181389	0.00927458	lbp-4
WBGene00002257	2288.35	0.154068	0.142942	1.07784	0.281107	0.454221	lbp-5
WBGene00002258	8761.08	-0.168664	0.101137	-1.66768	0.0953792	0.211582	lbp-6
WBGene00002259	1889.93	0.367515	0.155418	2.36469	0.018045	0.0591713	lbp-7
WBGene00002260	3.29486	0.307944	0.696415	0.442184	0.658356	NA	lbp-8
WBGene00002261	1024.85	0.184216	0.0589754	3.12361	0.00178645	0.0091567	ldb-1
WBGene00002262	1356.71	-0.382842	0.104748	-3.6549	0.000257285	0.00180208	ldh-1
WBGene00002263	6580	-0.136207	0.0697049	-1.95405	0.050695	0.130685	lea-1
WBGene00002264	17020.1	0.197537	0.058735	3.36319	0.000770478	0.00453587	lec-1
WBGene00002265	10467.3	0.2098	0.19748	1.06239	0.28806	0.461389	lec-2
WBGene00002266	3516.42	0.0851585	0.102307	0.832379	0.405195	0.58178	lec-3
WBGene00002267	1642.27	0.047327	0.13112	0.360943	0.718142	0.828251	lec-4
WBGene00002268	5436.09	0.268999	0.0550071	4.89027	1.007e-06	1.50815e-05	lec-5
WBGene00002269	19091.3	0.677922	0.0721832	9.39169	5.90453e-21	7.13849e-19	lec-6
WBGene00002270	32.9537	0.013434	0.284206	0.0472687	0.962299	0.978174	lec-7
WBGene00002271	4537.04	0.77839	0.104393	7.45638	8.89345e-14	4.92951e-12	lec-8
WBGene00002272	4942	0.745808	0.0596369	12.5058	6.93921e-36	2.89435e-33	lec-9
WBGene00002273	6014.82	0.927734	0.158072	5.86908	4.38223e-09	1.16981e-07	lec-10
WBGene00002274	817.083	1.76266	0.177937	9.90606	3.91792e-23	5.68405e-21	lec-11
WBGene00002275	658.638	0.0940444	0.0849244	1.10739	0.268126	0.441251	lem-2
WBGene00002276	1333.67	0.875146	0.120128	7.28512	3.21393e-13	1.67566e-11	lem-3
WBGene00002278	559.122	-0.222215	0.0945773	-2.34956	0.0187957	0.061154	lep-2
WBGene00002280	68564.4	-0.111456	0.168955	-0.659676	0.509462	0.671755	let-2
WBGene00002282	238.903	-0.531355	0.758973	-0.700098	0.483866	0.650877	let-4
WBGene00002295	1810.96	0.134122	0.111191	1.20622	0.227732	0.395614	let-19
WBGene00002297	2116.07	-0.0387696	0.100603	-0.385372	0.699962	0.815701	ect-2
WBGene00002299	654.64	0.072444	0.0744016	0.973689	0.330211	0.507437	let-23
WBGene00002324	280.843	0.189622	0.134256	1.41239	0.157835	0.30763	let-49
WBGene00002335	2106.66	-0.00237342	0.0579439	-0.0409607	0.967327	0.98124	let-60
WBGene00002344	10748	-0.00861893	0.0760485	-0.113335	0.909765	0.947888	let-70
WBGene00002348	7453.09	0.049184	0.095326	0.515956	0.605885	0.747566	myo-1
WBGene00002363	6579.14	0.103887	0.0484851	2.14266	0.0321402	0.0927567	let-92
WBGene00002368	859.02	0.331415	0.168964	1.96145	0.049826	0.129164	let-99
WBGene00002393	160.264	-0.495618	0.456661	-1.08531	0.277784	0.450876	lpr-1
WBGene00002497	1324.31	-0.164811	0.17991	-0.916075	0.359628	0.537043	let-268
WBGene00002583	4445.38	0.0222815	0.0699335	0.31861	0.750022	0.849804	let-363
WBGene00002601	21.1787	0.0232004	0.350035	0.0662801	0.947155	0.969587	let-381
WBGene00002632	1474.39	0.278735	0.074413	3.74578	0.000179836	0.00133291	let-413
WBGene00002637	4579.08	-0.282842	0.0591567	-4.78123	1.74223e-06	2.43241e-05	let-418
WBGene00002694	3901.98	-0.0392063	0.0576997	-0.679489	0.496828	0.661552	let-502
WBGene00002696	1498.33	-0.050698	0.0873521	-0.580386	0.561654	0.713793	let-504
WBGene00002717	5374.54	0.198357	0.0470496	4.21592	2.48764e-05	0.000246752	let-526
WBGene00002783	4624.26	0.0962307	0.0633633	1.51871	0.128834	0.264225	let-607
WBGene00002804	1901.73	-0.22575	0.0517299	-4.364	1.27704e-05	0.000137459	let-630
WBGene00002827	149.571	-0.846165	0.718067	-1.17839	0.23864	0.40844	let-653
WBGene00002845	13296	-0.111455	0.0922243	-1.20852	0.226848	0.3949	let-711
WBGene00002850	6793.85	-0.498222	0.0491202	-10.1429	3.56306e-24	5.66153e-22	let-716
WBGene00002855	3795.85	0.178758	0.0618661	2.88944	0.00385928	0.0171702	let-721
WBGene00002879	4144.11	-0.536105	0.0912588	-5.87456	4.23977e-09	1.1336e-07	let-754
WBGene00002881	384.215	0.382844	0.12001	3.19009	0.00142227	0.00755227	let-756
WBGene00002889	3496.99	-0.0254828	0.0999556	-0.254941	0.798769	0.882093	let-765
WBGene00002891	6278.04	-0.277117	0.0882282	-3.14091	0.00168422	0.00869956	let-767
WBGene00002915	14170.6	-0.0142007	0.108775	-0.130552	0.89613	0.939935	let-805
WBGene00002957	2265.95	-0.0175478	0.0446211	-0.393262	0.694126	0.810923	let-858
WBGene00002974	210.211	-0.0198627	0.118692	-0.167346	0.867098	0.922948	lev-1
WBGene00002975	60.2596	0.236737	0.215404	1.09904	0.271752	0.444981	lev-8
WBGene00002976	164.6	0.229654	0.134143	1.712	0.0868963	0.197302	lev-9
WBGene00002977	927.896	0.277775	0.0670728	4.14139	3.45211e-05	0.000324114	lev-10
WBGene00002978	44750.5	0.344856	0.0825694	4.17656	2.95955e-05	0.00028443	lev-11
WBGene00002979	1295.92	0.307034	0.0997292	3.07867	0.00207925	0.0103615	lfe-2
WBGene00002980	9832.19	0.319227	0.138984	2.29686	0.021627	0.0682863	lgg-1
WBGene00002981	1989.27	0.572047	0.177392	3.22477	0.00126076	0.00683383	lgg-2
WBGene00002982	235.449	0.0285754	0.137734	0.207468	0.835645	0.904848	lgg-3
WBGene00002983	2319.35	-0.232763	0.322797	-0.72108	0.47086	0.638851	lgx-1
WBGene00002985	1484.31	0.390044	0.088118	4.42638	9.5827e-06	0.000107373	lig-1
WBGene00002986	736.298	0.0446989	0.0754254	0.592623	0.553433	0.707994	lig-4
WBGene00002987	16.0503	0.442353	0.419606	1.05421	0.291787	0.46581	lim-4
WBGene00002988	197.071	0.386002	0.119134	3.24005	0.00119507	0.00655442	lim-6
WBGene00002989	266.992	0.347086	0.0911026	3.80983	0.000139061	0.00106819	lim-7
WBGene00002990	476.36	0.499157	0.114321	4.36629	1.26376e-05	0.000136784	lin-1
WBGene00002991	550.481	0.122424	0.0714086	1.71441	0.0864531	0.19643	lin-2
WBGene00002992	561.019	0.429504	0.194278	2.21076	0.0270521	0.0813368	lin-3
WBGene00002994	1971.45	-0.0561905	0.0866857	-0.64821	0.516849	0.676906	lin-5
WBGene00002996	418.773	0.137053	0.0798499	1.71638	0.0860928	0.195958	lin-7
WBGene00002997	148.355	0.0860907	0.141416	0.608775	0.542674	0.699472	lin-8
WBGene00002998	1114.27	0.137496	0.0679678	2.02296	0.043077	0.115825	lin-9
WBGene00002999	2156.28	0.143284	0.0815586	1.75682	0.078948	0.184013	lin-10
WBGene00003000	233.376	0.116404	0.143523	0.811052	0.417336	0.593517	lin-11
WBGene00003001	219.5	0.138776	0.143765	0.965296	0.334397	0.512029	lin-12
WBGene00003002	3425.71	-0.196218	0.0561707	-3.49324	0.000477192	0.00302258	lin-13
WBGene00003003	735.921	0.176623	0.0809808	2.18105	0.0291801	0.085999	lin-14
WBGene00003006	352.025	0.0909254	0.127265	0.714457	0.474945	0.643023	lin-17
WBGene00003007	400.07	0.375491	0.103223	3.63767	0.000275116	0.00190537	lin-18
WBGene00003008	13.8977	-0.154144	0.438064	-0.351877	0.724931	0.832513	lin-22
WBGene00003009	3034.17	0.259478	0.0802733	3.23243	0.00122741	0.00670317	lin-23
WBGene00003010	908.693	0.157905	0.0755141	2.09106	0.0365228	0.102222	lin-24
WBGene00003011	230.939	-0.0469441	0.141233	-0.332388	0.739596	0.842685	lin-25
WBGene00003012	1544.77	0.0661795	0.0932673	0.709568	0.477972	0.645693	lin-26
WBGene00003014	676.555	0.275872	0.0832819	3.31251	0.00092464	0.00530127	lin-28
WBGene00003015	483.307	-0.20004	0.140267	-1.42614	0.153827	0.301758	lin-29
WBGene00003017	46.6016	0.164196	0.227069	0.723111	0.469611	0.637717	lin-31
WBGene00003018	2.70703	-0.0897685	1.06606	-0.0842055	0.932893	NA	lin-32
WBGene00003019	451.673	-0.389321	0.114738	-3.39312	0.000691008	0.00414257	lin-33
WBGene00003020	1402.16	0.0326659	0.0819393	0.39866	0.690144	0.808209	lin-35
WBGene00003021	2112.05	0.0961666	0.0477202	2.01522	0.0438818	0.117554	lin-36
WBGene00003022	603.991	0.0526356	0.132221	0.398088	0.690565	0.808397	lin-37
WBGene00003024	200.414	0.0981778	0.124625	0.787787	0.430821	0.606056	lin-39
WBGene00003025	1613.07	0.164783	0.0716351	2.30031	0.0214309	0.0678983	lin-40
WBGene00003026	4135.93	0.50987	0.189607	2.68908	0.00716488	0.0282664	lin-41
WBGene00003029	77.3306	0.0790329	0.185569	0.425894	0.670185	0.793512	lin-44
WBGene00003030	1853.16	0.237545	0.118638	2.00227	0.0452561	0.120212	lin-45
WBGene00003031	46.624	-0.0519647	0.265619	-0.195636	0.844895	0.909551	lin-46
WBGene00003033	32.7989	0.21148	0.240054	0.880967	0.378335	0.55571	lin-48
WBGene00003034	1511.98	0.137563	0.0670116	2.05282	0.0400899	0.109737	lin-49
WBGene00003035	360.875	0.118731	0.111511	1.06475	0.286991	0.460222	lin-52
WBGene00003036	2711.59	0.171332	0.0856359	2.00071	0.045424	0.120527	lin-53
WBGene00003037	994.162	0.192994	0.11147	1.73136	0.0833877	0.191446	lin-54
WBGene00003038	261.412	0.114585	0.103873	1.10312	0.269974	0.443025	lin-56
WBGene00003040	1943.65	0.350283	0.0604014	5.79926	6.66088e-09	1.70707e-07	lin-59
WBGene00003041	1132.69	-0.0708404	0.07239	-0.978595	0.32778	0.504957	lin-61
WBGene00003043	1075.23	0.433527	0.153093	2.83178	0.0046289	0.0199815	lip-1
WBGene00003044	977.389	0.113823	0.0910662	1.2499	0.211337	0.377477	lir-1
WBGene00003045	334.82	0.0680603	0.0894125	0.761194	0.446541	0.619808	lir-2
WBGene00003046	46.0571	0.454653	0.215305	2.11167	0.034715	0.0983836	lir-3
WBGene00003047	1951.34	-0.146252	0.0475186	-3.07779	0.00208545	0.0103862	lis-1
WBGene00003048	2774	0.0176789	0.167595	0.105486	0.91599	0.951343	lit-1
WBGene00003052	8060.73	0.169068	0.0555449	3.0438	0.00233608	0.0113697	lmn-1
WBGene00003053	2678.36	0.234731	0.123929	1.89407	0.0582151	0.145135	lmp-1
WBGene00003055	1954.74	-0.0013177	0.189625	-0.00694897	0.994456	0.997079	lon-1
WBGene00003056	471.233	0.333076	0.106125	3.13852	0.00169805	0.00875744	lon-2
WBGene00003057	4930.86	-0.856939	0.699724	-1.22468	0.220695	0.387271	lon-3
WBGene00003058	2.38582	0.585543	1.05169	0.556764	0.577689	NA	lov-1
WBGene00003059	871.28	-0.186469	0.0765105	-2.43716	0.0148029	0.0505883	lpd-2
WBGene00003060	3798.47	-0.247227	0.0731088	-3.38164	0.00072055	0.00428274	lpd-3
WBGene00003061	3157.65	-0.138538	0.0578682	-2.39403	0.0166643	0.0554945	lpd-5
WBGene00003062	2955.9	-0.264988	0.0682294	-3.88378	0.000102843	0.00083314	lpd-6
WBGene00003063	5735.7	0.10449	0.0354404	2.94833	0.00319497	0.0146512	lpd-7
WBGene00003064	995.372	-0.177058	0.0857826	-2.06404	0.0390142	0.107447	lpd-8
WBGene00003065	1984.13	-0.140541	0.0667806	-2.10452	0.0353332	0.0997797	lpd-9
WBGene00003066	1278.71	-0.371064	0.0938523	-3.95371	7.69501e-05	0.000647747	lpl-1
WBGene00003067	404.766	-0.13299	0.0966038	-1.37666	0.168619	0.322582	lrg-1
WBGene00003068	1150.56	0.0301511	0.0784173	0.384496	0.700611	0.816043	lrk-1
WBGene00003071	5022.72	-0.513789	0.516407	-0.994931	0.31977	0.496745	lrp-1
WBGene00003072	3549.06	0.166861	0.107147	1.55732	0.119395	0.249642	lrp-2
WBGene00003073	7946.66	-0.247356	0.0630563	-3.92278	8.7532e-05	0.000723321	lars-1
WBGene00003074	1034.5	-0.424513	0.0791941	-5.36042	8.30304e-08	1.65703e-06	lars-2
WBGene00003075	433.952	-0.121018	0.299641	-0.403875	0.686304	0.805244	lrx-1
WBGene00003076	554.406	0.113145	0.0993084	1.13933	0.254565	0.426038	lsm-1
WBGene00003077	585.035	-0.331402	0.0909088	-3.64543	0.000266947	0.00185913	lsm-3
WBGene00003078	667.92	0.100765	0.0990346	1.01748	0.308926	0.484866	lsm-4
WBGene00003079	598.29	-0.0508262	0.0861738	-0.58981	0.555318	0.709412	lsm-5
WBGene00003080	343.305	-0.063775	0.114276	-0.558077	0.576792	0.726279	lsm-6
WBGene00003081	694.044	-0.0678747	0.0730776	-0.928803	0.352991	0.530711	lsm-7
WBGene00003082	880.856	-0.308315	0.113287	-2.72153	0.00649796	0.0261612	lsm-8
WBGene00003083	820.544	0.353028	0.0844984	4.17793	2.94174e-05	0.000282882	lst-1
WBGene00003084	922.036	0.19307	0.0708494	2.72508	0.00642859	0.025932	lst-2
WBGene00003085	7292.75	-0.00903712	0.0406872	-0.222112	0.824227	0.897511	ccar-1
WBGene00003086	1449.36	0.133344	0.0660911	2.01758	0.0436348	0.117023	lst-4
WBGene00003087	442.192	0.112941	0.105014	1.07549	0.282156	0.4552	lsy-2
WBGene00003089	856.928	-0.0246709	0.261488	-0.0943481	0.924833	0.956172	ltd-1
WBGene00003090	23569.9	0.275354	0.13555	2.03139	0.0422151	0.114041	lys-1
WBGene00003091	9803.87	0.802653	0.133703	6.00324	1.93421e-09	5.47884e-08	lys-2
WBGene00003092	283.444	2.16565	0.26092	8.30004	1.04074e-16	8.00168e-15	lys-3
WBGene00003093	3408.99	-0.652429	0.113567	-5.74485	9.2e-09	2.2978e-07	lys-4
WBGene00003094	24.9289	-0.762481	0.437592	-1.74245	0.08143	0.188143	lys-5
WBGene00003095	31.0909	-0.902362	0.344763	-2.61734	0.00886176	0.0336941	lys-6
WBGene00003096	2369.05	1.04056	0.181286	5.7399	9.47315e-09	2.36248e-07	lys-7
WBGene00003097	9161.92	0.605974	0.106181	5.70697	1.15004e-08	2.81338e-07	lys-8
WBGene00003098	0.0605576	0	3.81693	0	1	NA	lys-9
WBGene00003099	6.25647	2.89058	0.773768	3.73572	0.000187177	0.00137875	lys-10
WBGene00003100	43.4619	0.000787178	0.510111	0.00154315	0.998769	0.999548	mab-3
WBGene00003102	78.4048	0.12014	0.188446	0.637529	0.523781	0.683202	mab-5
WBGene00003104	1349.06	-0.223207	0.453061	-0.492664	0.62225	0.759445	mab-7
WBGene00003106	30.1095	0.236817	0.271171	0.873313	0.382493	0.559773	mab-9
WBGene00003107	700.001	-0.265718	0.314607	-0.844605	0.398331	0.575324	mab-10
WBGene00003111	202.244	0.398572	0.13793	2.88967	0.00385652	0.0171671	mab-20
WBGene00003112	75.2574	0.338766	0.197918	1.71165	0.0869615	0.197397	mab-21
WBGene00003114	11.8581	-2.11848	1.26385	-1.67621	0.0936972	0.208744	mab-23
WBGene00003119	1692.5	-0.16364	0.0505956	-3.23427	0.00121955	0.00666458	mac-1
WBGene00003123	2075.78	-0.233481	0.0558108	-4.18345	2.87122e-05	0.000277379	mag-1
WBGene00003124	108.995	-0.0340789	0.250276	-0.136165	0.891691	0.937663	mai-1
WBGene00003129	867.877	-0.0306596	0.118709	-0.258275	0.796194	0.88024	map-1
WBGene00003130	3552.91	-0.50669	0.0605288	-8.37106	5.71015e-17	4.62467e-15	map-2
WBGene00003132	3104.12	0.178533	0.0830523	2.14964	0.0315837	0.0914991	mat-1
WBGene00003133	2120.86	-0.150822	0.0608634	-2.47804	0.0132107	0.0462653	mat-2
WBGene00003134	924.631	-0.00461002	0.0644247	-0.0715568	0.942955	0.967233	mat-3
WBGene00003136	989.157	0.0419628	0.0876555	0.478724	0.632135	0.765574	mau-2
WBGene00003142	411.96	0.0826964	0.112527	0.734903	0.462399	0.632142	mau-8
WBGene00003143	236.005	0.186999	0.176118	1.06178	0.288334	0.461755	max-1
WBGene00003144	4552.6	0.0819071	0.0888107	0.922266	0.35639	0.534307	max-2
WBGene00003148	3204.27	-0.355225	0.0815528	-4.35576	1.32603e-05	0.000142182	mbf-1
WBGene00003149	959.425	-0.027798	0.125714	-0.221121	0.824998	0.897923	mbk-1
WBGene00003150	6215.21	0.296392	0.0653371	4.53634	5.7238e-06	6.8505e-05	mbk-2
WBGene00003151	4898.47	0.427081	0.0960128	4.44816	8.66074e-06	9.83633e-05	mca-1
WBGene00003153	11382.9	-0.106516	0.0632311	-1.68455	0.0920764	0.20598	mca-3
WBGene00003154	2796.02	0.0792929	0.123329	0.64294	0.520263	0.679986	mcm-2
WBGene00003155	2119.86	0.313224	0.116131	2.69716	0.0069934	0.0277863	mcm-3
WBGene00003156	1986.76	0.0749407	0.102681	0.729839	0.465489	0.634391	mcm-4
WBGene00003157	2239.47	0.0983843	0.101056	0.973564	0.330273	0.507485	mcm-5
WBGene00003158	2450.62	0.262069	0.124008	2.11333	0.0345727	0.0980805	mcm-6
WBGene00003159	2769.33	0.265939	0.127837	2.08031	0.0374973	0.104355	mcm-7
WBGene00003160	1672.12	-0.081215	0.0578017	-1.40506	0.160002	0.310983	mdf-1
WBGene00003161	620.889	0.247656	0.130757	1.89402	0.0582228	0.145135	mdf-2
[truncated: 19,883 more rows]

## Sheet: full_results_wt_vs_rescue_04-02
gene	baseMean	log2FoldChange	lfcSE	stat	pvalue	padj	symbol
WBGene00000001	838.043	0.105377	0.125946	0.836686	0.402769	0.554782	aap-1
WBGene00000002	423.817	0.0982523	0.251054	0.39136	0.695531	0.798291	aat-1
WBGene00000003	335.794	-0.0447628	0.0844534	-0.530029	0.596092	0.722457	aat-2
WBGene00000004	244.963	0.403548	0.11599	3.47917	0.000502976	0.00240482	aat-3
WBGene00000005	362.201	0.297719	0.232908	1.27827	0.201155	0.335317	aat-4
WBGene00000006	350.844	0.289305	0.130527	2.21644	0.0266613	0.0686339	aat-5
WBGene00000007	519.123	-0.180839	0.120242	-1.50396	0.132593	0.243977	aat-6
WBGene00000008	26.1274	-0.0466177	0.354676	-0.131438	0.895429	0.936223	aat-7
WBGene00000009	48.8614	-0.323782	0.256111	-1.26423	0.206149	0.341686	aat-8
WBGene00000010	871.613	-0.04698	0.0782497	-0.600385	0.548249	0.682187	aat-9
WBGene00000012	0.899936	2.50563	1.49856	1.67202	0.0945197	NA	abf-1
WBGene00000013	17.2299	1.45876	0.424013	3.44037	0.000580919	0.00272408	abf-2
WBGene00000014	0	NA	NA	NA	NA	NA	abf-3
WBGene00000015	4.68617	-0.182991	0.628164	-0.291312	0.770813	0.853888	abf-4
WBGene00000016	51.5972	0.980882	0.34838	2.81555	0.00486934	0.0166299	abf-5
WBGene00000017	98.2732	1.04149	0.279488	3.72643	0.00019421	0.00104957	abf-6
WBGene00000018	969.187	0.130858	0.107508	1.21719	0.223531	0.363017	abl-1
WBGene00000019	570.413	-0.604771	0.096632	-6.25849	3.88716e-10	7.21004e-09	abt-1
WBGene00000020	1137.15	0.157285	0.0699642	2.24808	0.0245712	0.0641917	abt-2
WBGene00000021	85.7067	-0.781335	0.189641	-4.12008	3.78734e-05	0.000250966	abt-3
WBGene00000022	2876.45	1.22979	0.16035	7.66942	1.72778e-14	6.18776e-13	abt-4
WBGene00000023	638.753	-0.577806	0.173585	-3.32866	0.000872663	0.00387414	abt-5
WBGene00000024	3945.22	-0.479566	0.184732	-2.596	0.00943151	0.0290301	abu-1
WBGene00000025	39.2947	-0.862645	0.405198	-2.12895	0.0332588	0.0820447	abu-2
WBGene00000026	0.159542	-0.412256	3.81693	-0.108007	0.91399	NA	abu-3
WBGene00000027	136.037	-0.992895	0.159588	-6.22162	4.9206e-10	8.91395e-09	abu-4
WBGene00000028	5.0451	-1.07625	1.07297	-1.00305	0.315837	0.467623	abu-5
WBGene00000029	1904.38	-0.686065	0.247558	-2.77132	0.00558288	0.0186858	abu-6
WBGene00000030	2092.66	-0.579391	0.240412	-2.41	0.0159527	0.0449609	abu-7
WBGene00000031	4096.94	-0.480462	0.220805	-2.17595	0.0295589	0.074521	abu-8
WBGene00000032	941.061	-0.801584	0.256251	-3.12812	0.00175927	0.0070881	abu-9
WBGene00000033	1787.3	-0.594411	0.231602	-2.56652	0.0102723	0.0311375	abu-10
WBGene00000034	2930.15	-0.768008	0.164797	-4.66032	3.15714e-06	2.74191e-05	abu-11
WBGene00000035	288.495	0.325536	0.129547	2.51287	0.0119752	0.0353758	ace-1
WBGene00000036	561.406	0.241568	0.145625	1.65884	0.0971478	0.192058	ace-2
WBGene00000037	90.6225	0.184662	0.142467	1.29617	0.194916	0.328022	ace-3
WBGene00000038	21.1694	0.649474	0.321538	2.0199	0.0433938	0.101938	ace-4
WBGene00000039	3367	0.0508645	0.429758	0.118356	0.905785	0.943048	acn-1
WBGene00000040	4478.53	-0.37263	0.11529	-3.2321	0.00122882	0.00520893	aco-1
WBGene00000041	22840.1	-0.228659	0.0524137	-4.36258	1.28538e-05	9.62651e-05	aco-2
WBGene00000042	63.6793	0.0411704	0.210449	0.195631	0.844899	0.904192	acr-2
WBGene00000043	29.0181	0.0310825	0.289723	0.107283	0.914564	0.948546	acr-3
WBGene00000044	22.7172	0.672272	0.289565	2.32166	0.0202513	0.0547653	acr-5
WBGene00000045	6.75323	-0.158245	0.587555	-0.269327	0.787678	0.865665	acr-6
WBGene00000046	30.4083	0.0410371	0.283014	0.145	0.88471	0.929459	acr-7
WBGene00000047	136.376	0.181699	0.165849	1.09557	0.273267	0.421243	acr-8
WBGene00000048	33.8349	0.155268	0.253373	0.612804	0.540006	0.676463	acr-9
WBGene00000049	7.38994	0.66725	0.542559	1.22982	0.218765	0.357247	acr-10
WBGene00000050	39.2016	0.0895701	0.215999	0.414679	0.678377	0.785302	acr-11
WBGene00000051	82.0881	0.0742378	0.16803	0.441812	0.658626	0.771066	acr-12
WBGene00000053	8.95248	-0.0363173	0.491326	-0.0739169	0.941076	0.965144	acr-14
WBGene00000054	104.352	-0.272725	0.171784	-1.58761	0.112375	0.21487	acr-15
WBGene00000055	127.944	-0.183183	0.165855	-1.10447	0.269387	0.417183	acr-16
WBGene00000056	50.6175	0.0468869	1.1118	0.042172	0.966362	0.980633	acr-17
WBGene00000057	61.4234	0.0672785	0.22802	0.295055	0.767952	0.851878	acr-18
WBGene00000058	28.0344	-0.1228	0.302435	-0.406037	0.684716	0.790312	acr-19
WBGene00000059	38.9514	0.482516	0.22939	2.10347	0.0354249	0.0864664	acr-20
WBGene00000060	22.7011	0.00829903	0.301229	0.0275506	0.978021	0.987253	acr-21
WBGene00000061	21.2588	0.17059	0.330116	0.516758	0.605325	0.729407	lgc-11
WBGene00000062	15.5332	0.891055	0.40832	2.18225	0.0290913	0.0735701	acr-23
WBGene00000063	63652.4	-0.254631	0.108598	-2.34471	0.0190418	0.0520049	act-1
WBGene00000064	29314.8	-0.809853	0.0898508	-9.01331	1.99933e-19	1.31363e-17	act-2
WBGene00000065	83599.3	0.0407136	0.067153	0.606282	0.544328	0.679535	act-3
WBGene00000066	71106.6	-0.210367	0.0964117	-2.18197	0.0291119	0.0735905	act-4
WBGene00000067	21513.7	-0.183167	0.098689	-1.856	0.0634536	0.137648	act-5
WBGene00000068	477.446	0.178115	0.113595	1.56798	0.116887	0.221372	acy-1
WBGene00000069	58.2252	0.486541	0.205468	2.36797	0.0178861	0.0493219	acy-2
WBGene00000070	700.314	0.456717	0.179026	2.55112	0.0107376	0.0323077	acy-3
WBGene00000071	340.422	0.123031	0.202657	0.60709	0.543791	0.679163	acy-4
WBGene00000072	466.374	-0.121926	0.0872631	-1.39723	0.162345	0.285705	add-1
WBGene00000073	335.645	0.369383	0.123559	2.98952	0.00279418	0.0104357	add-2
WBGene00000074	696.796	0.138223	0.107503	1.28576	0.198526	0.332296	adm-2
WBGene00000075	269.994	0.31156	0.108579	2.86944	0.00411202	0.0144271	adm-4
WBGene00000079	2331.33	-0.256422	0.0801937	-3.19753	0.0013861	0.00578995	adr-1
WBGene00000080	1052.97	-0.0899756	0.0797376	-1.1284	0.259153	0.405487	adr-2
WBGene00000081	8249.17	0.211243	0.105161	2.00875	0.0445632	0.104113	ads-1
WBGene00000082	2139.51	-0.239014	0.201267	-1.18755	0.235012	0.377004	adt-1
WBGene00000083	1613.93	0.0103051	0.0761496	0.135327	0.892354	0.934703	adt-2
WBGene00000084	390.338	0.399636	0.141475	2.82478	0.00473135	0.0162692	aex-1
WBGene00000085	25.5118	-0.0887683	0.276766	-0.320734	0.748412	0.837277	aex-2
WBGene00000086	497.89	0.218613	0.0862705	2.53404	0.0112756	0.0336339	aex-3
WBGene00000088	739.64	1.24581	0.0807001	15.4375	9.15682e-54	7.82129e-51	aex-5
WBGene00000089	214.023	0.239892	0.121002	1.98254	0.047419	0.109423	aex-6
WBGene00000090	1064.03	0.0346345	0.0494236	0.700768	0.483448	0.627612	age-1
WBGene00000092	540.783	0.492551	0.114037	4.31922	1.5658e-05	0.000114949	ags-3
WBGene00000093	358.79	-0.380281	0.0990818	-3.83805	0.000124015	0.000706421	agt-1
WBGene00000094	187.217	-0.0332447	0.124038	-0.26802	0.788684	0.866436	agt-2
WBGene00000095	374.395	0.324848	0.0786786	4.1288	3.64654e-05	0.00024324	aha-1
WBGene00000096	21.0962	0.219613	0.32453	0.676711	0.498589	0.64025	ahr-1
WBGene00000097	579.039	0.0674065	0.120535	0.559227	0.576007	0.70679	aip-1
WBGene00000098	3113.36	-0.071888	0.0666899	-1.07794	0.281059	0.430033	air-1
WBGene00000099	831.965	0.0581287	0.134438	0.432382	0.665464	0.775928	air-2
WBGene00000100	8046.11	0.213903	0.0517477	4.13358	3.57159e-05	0.000238614	ajm-1
WBGene00000101	3560.06	-0.00589182	0.0972248	-0.0606	0.951678	0.970977	aka-1
WBGene00000102	2710.6	0.225099	0.0463217	4.85946	1.17708e-06	1.13114e-05	akt-1
WBGene00000103	382.406	0.191508	0.0891556	2.14802	0.0317121	0.0790051	akt-2
WBGene00000105	3755.51	0.19433	0.152899	1.27096	0.203742	0.338612	alg-1
WBGene00000106	1080.56	-0.0825877	0.111716	-0.739266	0.459746	0.605945	alg-2
WBGene00000107	7069.41	-0.254215	0.0653603	-3.88943	0.000100479	0.000586429	alh-1
WBGene00000108	0.642167	0.935697	1.75934	0.531845	0.594833	NA	alh-2
WBGene00000109	2982.15	-0.153894	0.106304	-1.44768	0.147706	0.264992	alh-3
WBGene00000110	5833.11	0.11586	0.187147	0.619085	0.53586	0.672893	alh-4
WBGene00000111	298.418	0.0735662	0.116494	0.631502	0.527712	0.666223	alh-5
WBGene00000112	2516.95	-0.134639	0.0659305	-2.04213	0.0411387	0.0976073	alh-6
WBGene00000113	1139.85	0.290234	0.079295	3.66018	0.000252037	0.00131951	alh-7
WBGene00000114	8628.74	-0.265712	0.0831167	-3.19685	0.00138938	0.00579886	alh-8
WBGene00000115	3802.48	0.262422	0.146928	1.78606	0.0740892	0.155059	alh-9
WBGene00000116	497.643	-0.402537	0.0903533	-4.45515	8.38345e-06	6.55444e-05	alh-10
WBGene00000117	1206.5	-0.12716	0.0753952	-1.68658	0.0916837	0.183357	alh-11
WBGene00000118	3986.49	0.375036	0.121109	3.09667	0.00195707	0.00774262	alh-12
WBGene00000120	402.826	0.289248	0.162548	1.77947	0.0751632	0.156797	aly-1
WBGene00000121	2358.17	-0.0104257	0.125145	-0.0833093	0.933606	0.960539	aly-2
WBGene00000122	3279.5	0.00136949	0.0640607	0.0213781	0.982944	0.989606	aly-3
WBGene00000123	4867.86	-0.216943	0.0759085	-2.85795	0.00426381	0.0148802	ama-1
WBGene00000133	299.726	1.68264	0.317702	5.29627	1.1819e-07	1.39436e-06	amt-1
WBGene00000134	19.3266	0.736118	0.342878	2.14688	0.0318031	0.0791795	amt-2
WBGene00000135	70.1775	0.235293	0.198064	1.18796	0.234848	0.376847	amt-3
WBGene00000136	493.079	-0.414739	0.179553	-2.30984	0.0208968	0.0562617	amt-4
WBGene00000137	180.73	0.544459	0.123159	4.42079	9.83419e-06	7.55045e-05	amx-1
WBGene00000138	1639.76	-0.281363	0.165587	-1.69919	0.0892835	0.17982	amx-2
WBGene00000139	291.459	0.247842	0.165129	1.5009	0.133381	0.24519	amx-3
WBGene00000140	29084.5	0.0255806	0.0895056	0.285799	0.775032	0.856815	anc-1
WBGene00000142	1421.89	-0.126023	0.0722807	-1.74353	0.0812414	0.166869	aos-1
WBGene00000143	909.609	-0.309998	0.129504	-2.39374	0.0166778	0.0465609	apc-2
WBGene00000144	357.832	-0.207244	0.136213	-1.52148	0.12814	0.237421	apc-10
WBGene00000145	304.691	-0.180717	0.122462	-1.47569	0.140027	0.254476	apc-11
WBGene00000146	2610.55	0.351093	0.0912958	3.84567	0.000120224	0.000687807	ape-1
WBGene00000147	388.701	0.103484	0.135284	0.764939	0.444308	0.593724	aph-1
WBGene00000148	806.964	-0.128444	0.0598262	-2.14696	0.0317965	0.0791795	aph-2
WBGene00000149	10314.1	0.227056	0.0753329	3.01404	0.00257791	0.00974301	apl-1
WBGene00000150	1893.39	-0.0414211	0.118278	-0.350201	0.726188	0.822534	apm-1
WBGene00000151	869.004	0.0381585	0.112987	0.337726	0.735569	0.829382	apn-1
WBGene00000155	4393.07	-0.16489	0.0857307	-1.92335	0.0544367	0.122232	app-1
WBGene00000156	1236.48	0.239285	0.0688381	3.47606	0.000508833	0.00242872	2019-04-01
WBGene00000157	441.53	0.0359637	0.160951	0.223445	0.823189	0.889894	aps-2
WBGene00000158	2732.16	-0.0446198	0.0641722	-0.695312	0.486859	0.630125	apg-1
WBGene00000159	953.055	-0.201882	0.0825663	-2.44509	0.0144815	0.0414733	aps-1
WBGene00000160	2595.44	-0.0903601	0.118255	-0.764111	0.444801	0.594222	apb-1
WBGene00000161	1418.03	0.325861	0.173467	1.87852	0.0603106	0.132478	apa-2
WBGene00000162	1275.61	0.140355	0.0611429	2.29553	0.0217029	0.0579479	apd-3
WBGene00000163	1881.2	0.230534	0.053546	4.30534	1.66727e-05	0.000121666	apb-3
WBGene00000164	320.891	0.281703	0.114423	2.46193	0.0138191	0.0398704	apm-3
WBGene00000165	817.725	0.013582	0.0751403	0.180756	0.856559	0.911462	aps-3
WBGene00000166	54.0794	0.372482	0.205884	1.80919	0.0704222	0.14887	apt-9
WBGene00000168	923.485	0.353037	0.175663	2.00974	0.0444589	0.103954	apx-1
WBGene00000169	1159.25	-0.453806	0.113042	-4.01448	5.95768e-05	0.000371171	aqp-1
WBGene00000170	2035.19	0.305773	0.11927	2.56371	0.0103561	0.0313399	aqp-2
WBGene00000171	15.1549	-0.500453	0.374702	-1.3356	0.181679	0.31111	aqp-3
WBGene00000172	1387.63	-0.132227	0.111073	-1.19046	0.233868	0.375714	aqp-4
WBGene00000173	7.56665	0.219898	0.499375	0.440346	0.659687	0.771627	aqp-5
WBGene00000174	23.0714	-0.0165889	0.356922	-0.0464775	0.96293	0.978452	aqp-6
WBGene00000175	3229.76	-0.0345547	0.122182	-0.282814	0.777319	0.858312	aqp-7
WBGene00000176	696.372	0.522947	0.190598	2.74371	0.00607492	0.0200383	aqp-8
WBGene00000177	160.721	0.633891	0.156805	4.04256	5.28718e-05	0.000335392	aqp-9
WBGene00000178	2339.9	-0.0647056	0.0928827	-0.696638	0.486029	0.62948	aqp-10
WBGene00000179	1530.43	0.038966	0.0748064	0.520891	0.602442	0.727213	aqp-11
WBGene00000180	505.354	0.142968	0.100401	1.42397	0.154456	0.274452	arc-1
WBGene00000181	3806.39	-0.228902	0.0640347	-3.57465	0.000350697	0.00176174	ard-1
WBGene00000182	9709.27	-0.178649	0.0901595	-1.98148	0.0475373	0.109607	arf-1.2
WBGene00000183	10423.7	-0.169059	0.123567	-1.36815	0.171264	0.297358	arf-3
WBGene00000184	696.556	0.00208394	0.0735968	0.0283156	0.97741	0.986943	arf-6
WBGene00000185	0.490895	-1.15062	2.2145	-0.519583	0.603354	NA	arg-1
WBGene00000186	838.586	0.21186	0.0721459	2.93655	0.00331889	0.012058	ark-1
WBGene00000187	900.943	0.0434993	0.102202	0.42562	0.670385	0.779325	arl-1
WBGene00000188	66.7719	0.158097	0.232038	0.681343	0.495655	0.63774	arl-3
WBGene00000189	202.035	0.00719734	0.116288	0.0618926	0.950648	0.970649	arl-5
WBGene00000190	119.272	-1.21864	0.133719	-9.11347	7.97885e-20	5.49608e-18	arf-1.1
WBGene00000191	66.1477	-0.0225462	0.382891	-0.058884	0.953045	0.971576	arl-7
WBGene00000192	1852.83	0.295131	0.06685	4.41482	1.01093e-05	7.73047e-05	arl-8
WBGene00000193	8.26371	0.43074	0.468519	0.919365	0.357905	0.511031	arl-6
WBGene00000195	264.159	0.126687	0.134131	0.944505	0.344912	0.497814	arr-1
WBGene00000196	734.584	-0.403875	0.0614424	-6.57323	4.92344e-11	1.05928e-09	aars-1
WBGene00000197	6853	-0.276207	0.0669629	-4.12477	3.71098e-05	0.00024648	aars-2
WBGene00000198	4659.07	-0.4203	0.113829	-3.69238	0.000222164	0.00118416	art-1
WBGene00000199	1990.9	0.0906336	0.0488942	1.85367	0.0637867	0.138125	arx-1
WBGene00000200	2127.42	0.0143201	0.0505125	0.283497	0.776796	0.858011	arx-2
WBGene00000201	1586.06	0.0287716	0.0523028	0.550096	0.582254	0.711636	arx-3
WBGene00000202	688.738	-0.0939481	0.0965073	-0.973481	0.330314	0.482205	exos-4.2
WBGene00000203	873.516	-0.0401064	0.0788385	-0.508716	0.610951	0.734009	arx-5
WBGene00000204	1002.77	-0.0423275	0.0652931	-0.648269	0.516811	0.656408	arx-6
WBGene00000205	493.319	0.138351	0.101231	1.36669	0.171722	0.298002	arx-7
WBGene00000206	4739.33	-0.714159	0.0771875	-9.25226	2.19792e-20	1.56528e-18	asb-1
WBGene00000207	9168.14	-0.211745	0.0965779	-2.19248	0.0283451	0.0722069	asb-2
WBGene00000208	897.616	0.162535	0.0554858	2.9293	0.00339723	0.0122955	asc-1
WBGene00000209	3320.04	-0.371244	0.0598045	-6.20763	5.37905e-10	9.68286e-09	asg-1
WBGene00000210	4395.93	-0.208908	0.0786495	-2.65619	0.00790296	0.0250201	asg-2
WBGene00000211	243.327	0.162247	0.113211	1.43314	0.151818	0.270918	asm-1
WBGene00000212	380.91	0.561149	0.139619	4.01915	5.84087e-05	0.000364691	asm-2
WBGene00000213	19.723	-0.336551	0.398418	-0.844717	0.398269	0.550144	asm-3
WBGene00000214	70431.2	-0.0727079	0.107101	-0.678871	0.49722	0.638983	asp-1
WBGene00000215	15571.4	0.20969	0.0841926	2.4906	0.0127527	0.0372465	asp-2
WBGene00000216	41832.7	0.18201	0.06192	2.93944	0.00328809	0.0119639	asp-3
WBGene00000217	12072.3	0.216066	0.0792849	2.72518	0.00642656	0.0210356	asp-4
WBGene00000218	24384.8	0.294406	0.0730093	4.03245	5.51976e-05	0.000347317	asp-5
WBGene00000219	34115.2	0.0691182	0.0865383	0.798701	0.424464	0.575394	asp-6
WBGene00000220	171.081	0.679131	0.450612	1.50713	0.131777	0.242631	atf-2
WBGene00000221	2513.05	0.20049	0.101475	1.97577	0.0481811	0.110673	atf-5
WBGene00000222	332.456	0.32558	0.11052	2.94591	0.00322007	0.0117714	atf-6
WBGene00000223	4683.2	0.153395	0.0851619	1.80122	0.071668	0.151111	atf-7
WBGene00000224	1959.34	0.239529	0.0822339	2.91277	0.00358236	0.0128404	atgp-1
WBGene00000225	708.152	0.0146611	0.0956503	0.153278	0.878179	0.925548	atgp-2
WBGene00000226	2004.51	-0.211465	0.0728943	-2.90098	0.00371999	0.0132421	atl-1
WBGene00000227	1114.77	-0.197123	0.0618742	-3.18587	0.00144318	0.00598686	atm-1
WBGene00000228	10570.7	0.0361911	0.0521303	0.694243	0.48753	0.630658	atn-1
WBGene00000229	57128.8	-0.547917	0.0958639	-5.71557	1.09335e-08	1.57884e-07	atp-2
WBGene00000230	15223.2	-0.186737	0.0614322	-3.03973	0.00236794	0.00907595	atp-3
WBGene00000231	5677.59	-0.225813	0.0754582	-2.99255	0.00276653	0.0103528	atx-2
WBGene00000232	223.856	0.081661	0.117151	0.697055	0.485768	0.629342	avr-14
WBGene00000233	397.86	0.241096	0.210078	1.14765	0.251113	0.39676	avr-15
WBGene00000235	2056.91	-0.424787	0.0746649	-5.68924	1.27605e-08	1.81203e-07	baf-1
WBGene00000236	830.678	-0.458812	0.110126	-4.16623	3.09673e-05	0.000209677	bag-1
WBGene00000237	980.387	0.337347	0.0848605	3.97531	7.02876e-05	0.00042929	bam-2
WBGene00000238	638.435	0.375437	0.0725304	5.17626	2.26373e-07	2.53084e-06	bar-1
WBGene00000239	1120.47	0.223371	0.149293	1.49619	0.134605	0.246905	bas-1
WBGene00000240	1573.69	-0.0108097	0.115172	-0.0938569	0.925223	0.955309	pah-1
WBGene00000241	16.2503	0.125708	0.340018	0.369711	0.711598	0.811606	bbs-1
WBGene00000242	17.8432	0.332048	0.337687	0.983302	0.325459	0.477066	bbs-2
WBGene00000244	30.1153	0.58796	0.263468	2.23162	0.0256403	0.0665775	bbs-8
WBGene00000245	586.055	-0.159555	0.103781	-1.53742	0.124191	0.232219	bca-1
WBGene00000246	118.662	0.166384	0.211312	0.787385	0.431057	0.5816	bcc-1
WBGene00000247	625.328	-0.0416781	0.113739	-0.366436	0.71404	0.813516	bec-1
WBGene00000248	1578.29	-0.246434	0.0752204	-3.27616	0.00105229	0.00455442	ben-1
WBGene00000249	531.413	-0.0818868	0.109377	-0.748669	0.454057	0.601547	bir-1
WBGene00000250	332.89	-0.31625	0.108744	-2.90821	0.00363499	0.0129909	bir-2
WBGene00000251	4746.39	0.399921	0.917553	0.435856	0.662941	0.774075	bli-1
WBGene00000252	5198.39	-0.225867	0.819982	-0.275453	0.782968	0.862264	bli-2
WBGene00000253	1827.84	-0.0293751	0.0715819	-0.41037	0.681534	0.787464	bli-3
WBGene00000254	8560.08	0.0201515	0.0971823	0.207358	0.835731	0.898307	bli-4
WBGene00000255	206.933	-0.131694	0.161848	-0.813686	0.415825	0.567083	bli-5
WBGene00000256	33445.7	-0.456664	0.280437	-1.62841	0.103439	0.201626	bli-6
WBGene00000257	2349.47	-0.17332	0.0444914	-3.89558	9.79621e-05	0.000574251	bmk-1
WBGene00000259	777.62	-0.143484	0.0669829	-2.1421	0.0321858	0.0799616	bpl-1
WBGene00000262	72.0409	0.522549	0.189869	2.75215	0.00592059	0.0196315	bra-1
WBGene00000263	7074.32	-0.122165	0.116912	-1.04494	0.296052	0.446299	F23H11.5
WBGene00000264	468.942	-0.141213	0.116333	-1.21387	0.224798	0.364695	brc-1
WBGene00000265	611.938	-0.187065	0.0930892	-2.00953	0.0444815	0.103975	brd-1
WBGene00000266	1987.93	0.0520276	0.13047	0.39877	0.690063	0.794256	bre-1
WBGene00000267	201.913	0.296518	0.114226	2.59588	0.00943483	0.0290301	bre-2
WBGene00000268	3004.27	0.0446387	0.107756	0.414257	0.678686	0.785447	bre-3
WBGene00000269	423.055	-0.1111	0.11681	-0.951116	0.341545	0.494368	bre-4
WBGene00000270	252.24	-0.153292	0.109838	-1.39561	0.162831	0.286384	bre-5
WBGene00000271	1175.65	-0.0465166	0.106266	-0.437736	0.661578	0.772768	brf-1
WBGene00000272	6.25207	0.498479	0.558208	0.893	0.371857	0.524691	bro-1
WBGene00000273	7565.62	0.290552	0.151535	1.9174	0.0551877	0.123577	brp-1
WBGene00000274	1664.6	-0.180293	0.0540826	-3.33365	0.000857134	0.00381115	btf-1
WBGene00000275	3172.6	-0.185448	0.0587954	-3.15412	0.00160983	0.00656986	bub-1
WBGene00000276	3138.52	-0.202765	0.0549717	-3.68853	0.000225551	0.00119996	byn-1
WBGene00000277	2080.76	0.436729	0.08528	5.12111	3.03737e-07	3.30283e-06	cab-1
WBGene00000279	55.5971	0.464034	0.243015	1.90949	0.0561991	0.125333	cah-1
WBGene00000280	55.1525	0.272553	0.190992	1.42704	0.153567	0.273156	cah-2
WBGene00000281	999.976	0.133268	0.135961	0.980188	0.326993	0.478624	cah-3
WBGene00000282	3582.24	0.0686977	0.0845354	0.81265	0.416419	0.567551	cah-4
WBGene00000283	977.026	0.0862345	0.0819739	1.05198	0.292811	0.443173	cah-5
WBGene00000284	154.869	0.101926	0.116906	0.871865	0.383282	0.535693	cah-6
WBGene00000285	276.193	0.518801	0.127726	4.06182	4.86907e-05	0.000312466	cal-1
WBGene00000286	216.39	0.743603	0.128954	5.76641	8.0976e-09	1.2145e-07	cal-2
WBGene00000287	29.3976	0.91009	0.309298	2.94244	0.0032564	0.0118663	cal-3
WBGene00000288	143.356	0.447986	0.118898	3.76783	0.000164675	0.000910438	cal-4
WBGene00000289	1125.8	0.315226	0.0942947	3.34299	0.000828803	0.00370059	cam-1
WBGene00000292	2377.97	0.185462	0.0441324	4.20241	2.64091e-05	0.000182502	cap-1
WBGene00000293	3241.54	0.167662	0.0458091	3.66001	0.00025221	0.00132001	cap-2
WBGene00000294	3013.53	0.00611287	0.0805554	0.075884	0.939511	0.964021	cas-1
WBGene00000295	73.8111	0.430892	0.170746	2.52358	0.0116167	0.0345187	cat-1
WBGene00000296	50.3308	0.270811	0.218028	1.24209	0.214203	0.351545	cat-2
WBGene00000298	1346.85	0.310262	0.14547	2.13283	0.0329389	0.0814439	cat-4
WBGene00000301	25.6469	2.81778	0.501914	5.61407	1.97618e-08	2.69211e-07	cav-1
WBGene00000302	130.928	0.0415328	0.17623	0.235674	0.813686	0.883674	cav-2
WBGene00000366	4890.49	0.0376558	0.0679312	0.554323	0.579358	0.70946	cbp-1
WBGene00000367	493.317	0.499549	0.14448	3.45756	0.000545093	0.00258026	cca-1
WBGene00000368	486.544	0.107038	0.105103	1.01841	0.308484	0.459886	ccb-1
WBGene00000369	1272.16	0.0392454	0.0829072	0.473365	0.635953	0.754025	ccf-1
WBGene00000370	2711.45	0.427308	0.0761911	5.60837	2.04236e-08	2.76025e-07	ccg-1
WBGene00000371	9265.88	-0.137437	0.113795	-1.20776	0.227139	0.367757	cco-1
WBGene00000372	0.811187	0.341655	1.93022	0.177003	0.859506	NA	cyp-13A7
WBGene00000373	348.028	-1.60929	0.248794	-6.46837	9.9066e-11	2.03897e-09	cyp-14A5
WBGene00000374	352.39	-0.170794	0.128821	-1.32582	0.1849	0.31514	cyp-31A1
WBGene00000375	522.738	0.00348741	0.0935872	0.0372638	0.970275	0.982758	cyp-44A1
WBGene00000376	5524.6	0.0263397	0.0499734	0.527075	0.598142	0.724133	ccr-4
WBGene00000377	8482.88	-0.386489	0.0797909	-4.84377	1.27398e-06	1.21765e-05	cct-1
WBGene00000378	7564.01	-0.445208	0.0846947	-5.25663	1.46721e-07	1.70506e-06	cct-2
WBGene00000379	8544.21	-0.394838	0.0689488	-5.72654	1.02502e-08	1.48898e-07	cct-4
WBGene00000380	15905.1	-0.469479	0.0896969	-5.23405	1.65832e-07	1.90255e-06	cct-5
WBGene00000381	8571.75	-0.477115	0.0784498	-6.08179	1.18847e-09	2.03434e-08	cct-6
WBGene00000382	1152.86	0.0554332	0.0816626	0.678808	0.497259	0.638986	cdc-6
WBGene00000383	1820.19	0.112581	0.0662883	1.69835	0.0894416	0.180053	cdc-14
WBGene00000386	2313.45	-0.0595801	0.0806543	-0.738709	0.460083	0.60617	cdc-25.1
WBGene00000387	209.728	0.773001	0.121624	6.35564	2.07556e-10	4.06615e-09	cdc-25.2
WBGene00000388	105.202	1.11257	0.359065	3.09852	0.00194492	0.0077017	cdc-25.3
WBGene00000389	143.454	-0.537767	0.211176	-2.54654	0.0108797	0.0326812	cdc-25.4
WBGene00000390	4139.14	0.0239285	0.0645156	0.370895	0.710716	0.810978	cdc-42
WBGene00000391	439.826	0.519842	0.133937	3.88125	0.000103923	0.000603644	cdd-1
WBGene00000392	582.003	-0.651879	0.133525	-4.8821	1.04965e-06	1.0223e-05	cdd-2
WBGene00000393	1023.13	0.289758	0.0670296	4.32284	1.54035e-05	0.000113422	cdf-1
WBGene00000395	249.111	0.984667	0.209302	4.70453	2.54447e-06	2.25453e-05	cdh-3
WBGene00000396	857.535	0.283898	0.181997	1.5599	0.118783	0.223946	cdh-4
WBGene00000397	488.158	0.238289	0.522266	0.456259	0.648203	0.763423	cdh-5
WBGene00000399	205.523	1.35502	1.0091	1.34281	0.179334	0.308144	cdh-7
WBGene00000401	207.739	0.0308305	0.278621	0.110654	0.911891	0.94675	cdh-9
WBGene00000402	532.247	1.17479	0.916604	1.28167	0.199958	0.333921	cdh-10
WBGene00000403	1813.03	0.473327	0.0654408	7.23292	4.72732e-13	1.40046e-11	casy-1
WBGene00000405	2028.49	-0.0123135	0.0941723	-0.130755	0.895969	0.93648	cdk-1
WBGene00000406	72.4282	0.393401	0.185209	2.1241	0.0336621	0.0828722	cdk-4
WBGene00000407	653.833	0.122362	0.102311	1.19598	0.231704	0.373168	cdk-5
WBGene00000408	850.197	-0.0210002	0.0845559	-0.248359	0.803857	0.87699	cdk-7
WBGene00000409	710.836	0.316269	0.0718654	4.40085	1.07826e-05	8.18663e-05	cdk-8
WBGene00000410	694.251	-0.0127549	0.0623064	-0.204713	0.837797	0.899735	cdk-9
WBGene00000411	2001.02	0.255724	0.0729163	3.50708	0.000453048	0.0021987	cdl-1
WBGene00000412	52.6608	-0.178683	0.234941	-0.760543	0.44693	0.595965	cdr-1
WBGene00000413	558.766	0.322115	0.103911	3.09992	0.00193573	0.00767062	cdt-1
WBGene00000414	812.85	0.0403132	0.0822858	0.489916	0.624193	0.745045	cec-1
WBGene00000415	1678.88	0.539856	0.133778	4.03546	5.4495e-05	0.000343646	ced-1
WBGene00000416	679.101	-0.0598997	0.125075	-0.478912	0.632001	0.750589	ced-2
WBGene00000417	1527.72	0.26671	0.160773	1.65892	0.0971313	0.192052	ced-3
WBGene00000418	581.699	-0.238949	0.0707892	-3.3755	0.00073682	0.00334141	ced-4
WBGene00000419	1813.63	0.143425	0.104727	1.3695	0.170841	0.296896	ced-5
WBGene00000420	742.69	0.318416	0.114828	2.77299	0.00555436	0.0186195	ced-6
WBGene00000421	4656.16	0.162257	0.0808714	2.00636	0.0448179	0.104602	ced-7
WBGene00000422	20.0582	0.994405	0.434648	2.28784	0.0221468	0.0588939	ced-8
WBGene00000423	718.227	0.106831	0.135999	0.785527	0.432145	0.582524	ced-9
WBGene00000424	1096.54	-0.124556	0.0774903	-1.60738	0.107971	0.208557	ced-10
WBGene00000425	232.939	-0.00427131	0.267404	-0.0159732	0.987256	0.992355	ced-11
WBGene00000426	1140.89	0.219464	0.10405	2.10922	0.0349255	0.0854284	ced-12
WBGene00000427	0.166681	0.309065	3.81693	0.0809723	0.935464	NA	ced-13
WBGene00000428	10.7613	1.31464	0.458135	2.86956	0.00411045	0.0144246	ceh-1
WBGene00000429	15.8835	0.120634	0.385074	0.313276	0.754071	0.841174	ceh-2
WBGene00000430	48.3568	-0.0235547	0.238668	-0.0986923	0.921383	0.952847	ceh-5
WBGene00000431	44.1652	0.376572	0.241083	1.562	0.118288	0.223283	ceh-6
WBGene00000432	0.72755	0.863188	1.71652	0.502872	0.615054	NA	ceh-7
WBGene00000433	2.65266	-0.167757	0.780403	-0.214962	0.829797	0.894292	ceh-8
WBGene00000434	6.11312	-0.366753	0.672252	-0.545559	0.585369	0.714103	ceh-9
WBGene00000435	9.39896	0.709651	0.45571	1.55724	0.119413	0.224885	ceh-10
WBGene00000436	3.76002	-1.21348	0.820748	-1.47851	0.139271	0.253373	ceh-12
WBGene00000437	159.125	0.0359169	0.165844	0.216571	0.828543	0.893504	ceh-13
WBGene00000438	202.154	0.163999	0.131692	1.24532	0.213013	0.350096	ceh-14
WBGene00000439	3.51092	0.856321	0.740371	1.15661	0.247431	0.39243	ceh-16
WBGene00000440	4.51004	0.575941	0.728434	0.790656	0.429145	0.579945	ceh-17
WBGene00000441	983.499	0.113514	0.0530572	2.13947	0.032398	0.0803623	ceh-18
WBGene00000442	21.7847	0.0910419	0.358147	0.254203	0.799339	0.873871	ceh-19
WBGene00000443	403.481	0.277496	0.0978308	2.83649	0.00456121	0.0157699	ceh-20
WBGene00000444	87.5023	1.27027	0.197873	6.41962	1.36614e-10	2.74562e-09	ceh-21
WBGene00000445	34.4242	0.652553	0.258577	2.52363	0.011615	0.0345187	ceh-22
WBGene00000446	25.777	0.227671	0.307623	0.740099	0.45924	0.605736	ceh-23
WBGene00000447	25.0617	0.219082	0.260803	0.840029	0.400892	0.552963	ceh-24
WBGene00000448	115.09	0.209936	0.144525	1.45259	0.146338	0.263036	pros-1
WBGene00000449	39.6801	0.198263	0.230281	0.860964	0.389258	0.54155	ceh-27
WBGene00000450	0	NA	NA	NA	NA	NA	ceh-28
WBGene00000451	18.2073	0.302825	0.326247	0.928206	0.353301	0.506371	ceh-30
WBGene00000452	18.0847	0.129345	0.346783	0.372984	0.70916	0.80969	ceh-31
WBGene00000453	224.217	0.485	0.112073	4.32754	1.50785e-05	0.000111125	ceh-32
WBGene00000454	17.2941	0.313037	0.370432	0.845058	0.398078	0.549969	ceh-33
WBGene00000455	70.3247	0.124372	0.170569	0.729161	0.465903	0.611537	ceh-34
WBGene00000457	2.03144	2.20846	1.32769	1.66339	0.0962347	NA	ceh-36
WBGene00000458	279.233	0.121397	0.13498	0.899365	0.368458	0.521758	ceh-37
WBGene00000459	1752.93	0.128473	0.0926802	1.3862	0.165687	0.289961	ceh-38
WBGene00000460	101.99	1.42206	0.204038	6.9696	3.17833e-12	8.18934e-11	ceh-39
WBGene00000461	8.37154	2.26861	0.574276	3.95039	7.80237e-05	0.000470816	ceh-40
WBGene00000462	63.6065	0.645371	0.200901	3.21238	0.00131638	0.00553612	ceh-41
WBGene00000463	53.0899	0.730721	0.226666	3.22378	0.00126509	0.00534674	ceh-43
WBGene00000464	1971.43	0.094093	0.055628	1.69147	0.0907475	0.182017	ceh-44
WBGene00000465	7667.44	0.513751	0.258893	1.98441	0.0472096	0.109073	cpg-1
WBGene00000466	1034.44	-0.304393	0.064922	-4.68859	2.75094e-06	2.41865e-05	cel-1
WBGene00000467	846.947	-0.29452	0.11326	-2.60039	0.00931192	0.0287454	cep-1
WBGene00000468	0.841305	-0.842247	1.91427	-0.439983	0.65995	NA	ces-1
WBGene00000469	1.45556	0.746407	1.14837	0.649971	0.515711	NA	ces-2
WBGene00000472	9445.31	0.17669	0.0595617	2.9665	0.00301211	0.0111232	cey-1
WBGene00000473	18552.9	-0.306945	0.1709	-1.79605	0.0724865	0.152367	cey-2
WBGene00000474	8304.71	-0.0955958	0.139536	-0.685099	0.493281	0.635787	cey-3
WBGene00000475	11016	-0.0518406	0.0736791	-0.7036	0.481682	0.626224	cey-4
WBGene00000476	116.499	0.313293	0.150278	2.08475	0.0370916	0.0896992	cfi-1
WBGene00000477	206.732	0.573403	0.11061	5.18401	2.17166e-07	2.43909e-06	cft-1
WBGene00000478	61.7476	0.482767	0.235412	2.05073	0.0402932	0.095921	cfz-2
WBGene00000479	29234.1	-0.323986	0.135117	-2.39782	0.0164928	0.0460972	cgh-1
WBGene00000480	2780.68	0.0704698	0.0821243	0.858087	0.390844	0.542961	cgp-1
WBGene00000481	113.411	0.173011	0.158067	1.09454	0.273718	0.421634	cha-1
WBGene00000482	1086.21	0.493598	0.143014	3.45138	0.000557718	0.00263336	chd-3
WBGene00000483	0.518471	-0.34624	1.96783	-0.17595	0.860333	NA	che-1
WBGene00000484	45.2365	0.293457	0.24897	1.17868	0.238524	0.381175	che-2
WBGene00000485	119.518	0.442351	0.176973	2.49954	0.0124354	0.0364568	che-3
WBGene00000487	3.35718	-0.00250423	0.695136	-0.00360251	0.997126	0.998528	che-6
WBGene00000488	44.78	0.0716318	0.224227	0.319462	0.749376	0.837911	che-7
WBGene00000490	52.8786	0.365539	0.219075	1.66856	0.0952052	0.189005	che-11
WBGene00000491	60.803	0.448782	0.237018	1.89345	0.0582981	0.129238	che-12
WBGene00000492	55.2009	0.430154	0.200997	2.1401	0.0323468	0.0802586	che-13
WBGene00000493	297.544	0.169559	0.52061	0.325693	0.744656	0.835312	che-14
WBGene00000496	2454.66	0.0674589	0.206805	0.326196	0.744276	0.835203	chs-1
WBGene00000497	1124.3	-0.0504428	0.305485	-0.165124	0.868847	0.919895	chs-2
WBGene00000498	774.882	0.255612	0.0904261	2.82675	0.00470229	0.0161865	chk-1
WBGene00000499	312.109	-0.868249	0.110446	-7.86128	3.80225e-15	1.46954e-13	chk-2
WBGene00000500	769.235	0.0480546	0.0931914	0.515655	0.606095	0.729921	chn-1
WBGene00000501	101.553	0.328809	0.145276	2.26335	0.0236141	0.0621763	cho-1
WBGene00000502	1386.33	-0.626021	0.0918671	-6.81442	9.46439e-12	2.25181e-10	chp-1
WBGene00000503	80.1192	0.403576	0.505629	0.798166	0.424774	0.575634	cht-1
WBGene00000506	282.881	0.161645	0.0913551	1.76941	0.0768254	0.159448	cic-1
WBGene00000507	685.264	-0.047948	0.0855685	-0.560346	0.575243	0.706208	cit-1.1
WBGene00000508	1110.15	-0.0905638	0.0882411	-1.02632	0.30474	0.456015	cit-1.2
WBGene00000509	1137.34	0.16929	0.136397	1.24116	0.214548	0.352009	cka-1
WBGene00000510	253.655	0.345055	0.109399	3.15411	0.00160987	0.00656986	cka-2
WBGene00000511	154.489	0.119113	0.127621	0.933335	0.350647	0.503498	ckb-1
WBGene00000512	2049.31	-0.378682	0.501842	-0.754583	0.450499	0.598249	ckb-2
WBGene00000513	3.20437	-0.775339	0.788005	-0.983926	0.325152	0.476858	ckb-3
WBGene00000514	345.704	-0.0191445	0.164867	-0.116121	0.907557	0.944075	ckb-4
WBGene00000515	687.164	0.113595	0.118986	0.954693	0.339733	0.49242	ckc-1
WBGene00000516	355.957	0.408076	0.108333	3.76688	0.0001653	0.000913264	cki-1
WBGene00000517	882.195	0.071672	0.0911168	0.786594	0.431519	0.581957	cki-2
WBGene00000518	115.347	0.0424273	0.163163	0.260031	0.79484	0.870545	ckk-1
WBGene00000519	930.078	0.10838	0.0571167	1.89752	0.0577595	0.128227	cku-70
WBGene00000520	840.236	0.360754	0.0954541	3.77934	0.000157245	0.000874703	cku-80
WBGene00000521	17.4838	1.32912	0.716079	1.8561	0.0634391	0.137634	cky-1
WBGene00000522	1527.03	1.12275	0.100632	11.157	6.61938e-29	9.9192e-27	clc-1
WBGene00000523	61.1817	0.107359	0.249054	0.431068	0.666419	0.776564	clc-2
WBGene00000524	127.246	0.109296	0.142098	0.769161	0.441798	0.591476	clc-3
WBGene00000525	2.79818	-1.94869	1.01758	-1.91502	0.0554894	0.12409	clc-4
WBGene00000526	63.7006	0.166079	0.265847	0.624718	0.532156	0.66997	clc-5
WBGene00000527	1671.44	0.0978705	0.108687	0.900476	0.367867	0.52117	cle-1
WBGene00000528	2122.59	0.391995	0.129985	3.0157	0.00256389	0.0097034	clh-1
WBGene00000529	117.855	0.563058	0.133681	4.21195	2.53171e-05	0.000176527	clh-2
WBGene00000530	678.376	0.462877	0.0937887	4.93531	8.00226e-07	7.97565e-06	clh-3
WBGene00000531	177.052	0.436927	0.126653	3.44978	0.000561035	0.00264683	clh-4
WBGene00000532	1825.01	-0.0922354	0.0493859	-1.86764	0.0618116	0.134805	clh-5
WBGene00000533	914.4	-0.0972228	0.079661	-1.22046	0.222291	0.361726	clh-6
WBGene00000534	3599.7	0.304473	0.0753115	4.04285	5.28059e-05	0.000335223	cpi-2
WBGene00000535	1806.46	-0.607552	0.117026	-5.19161	2.0848e-07	2.3477e-06	cpi-1
WBGene00000536	649.479	-0.0842143	0.075823	-1.11067	0.266711	0.41431	clk-1
WBGene00000537	677.535	0.0138777	0.0975284	0.142294	0.886848	0.930877	clk-2
WBGene00000539	170.653	-0.487565	0.116409	-4.18838	2.80951e-05	0.000192441	cln-3.1
WBGene00000540	266.655	0.145207	0.104021	1.39595	0.16273	0.286236	cln-3.2
WBGene00000541	99.2776	-0.774785	0.20268	-3.8227	0.000132001	0.000746184	cln-3.3
WBGene00000542	7326.86	0.331104	0.109883	3.01325	0.00258465	0.00976417	clp-1
WBGene00000543	772.045	-0.0837243	0.0752894	-1.11203	0.266124	0.413629	clp-2
WBGene00000544	240.283	-0.510913	0.12705	-4.02134	5.78678e-05	0.000361843	clp-3
WBGene00000545	871.999	0.231447	0.0985895	2.34758	0.0188958	0.0516889	clp-4
WBGene00000546	637.179	-0.484954	0.132316	-3.66511	0.000247232	0.00129673	clp-6
WBGene00000547	1746.79	0.00491676	0.0998811	0.0492261	0.960739	0.976807	clp-7
WBGene00000548	1971.94	0.0241157	0.0676142	0.356666	0.721342	0.818511	clr-1
WBGene00000549	1813.54	-0.479192	0.0530165	-9.03855	1.5876e-19	1.06357e-17	cls-2
WBGene00000550	6953.89	-0.756584	0.0602992	-12.5472	4.11956e-36	1.06628e-33	clu-1
WBGene00000551	4.05881	2.31781	1.03045	2.24932	0.0244918	0.0640432	clx-1
WBGene00000552	10303.3	-0.0475258	0.0863905	-0.550127	0.582232	0.711636	cmd-1
WBGene00000553	135.346	0.370153	0.169494	2.18387	0.0289715	0.0733214	cmk-1
WBGene00000554	1289.4	0.202265	0.0599772	3.37236	0.000745282	0.00337889	cnb-1
WBGene00000555	0.254358	-0.412261	3.5297	-0.116798	0.907021	NA	cnc-1
WBGene00000556	148.182	0.151061	0.453735	0.332928	0.739188	0.832293	cnc-2
WBGene00000557	200.042	0.38967	0.783747	0.497188	0.619056	0.741037	cnc-3
WBGene00000558	726.973	-1.19425	0.517898	-2.30597	0.0211125	0.0566817	cnc-4
WBGene00000559	0.16937	-1.84445	3.80387	-0.484888	0.627756	NA	cnc-5
WBGene00000560	0.385455	1.05382	2.25335	0.46767	0.64002	NA	cnc-6
WBGene00000561	1.65627	1.51738	1.23313	1.23051	0.218506	NA	cnd-1
WBGene00000562	45.7301	-0.569068	0.224053	-2.53988	0.0110891	0.0332167	cng-1
WBGene00000563	7.74098	-0.0768088	0.531006	-0.144648	0.884989	0.929488	cng-3
WBGene00000564	1061.99	0.196949	0.0989941	1.9895	0.0466462	0.108004	cnk-1
WBGene00000565	1457.4	0.214089	0.0791914	2.70344	0.0068626	0.0222202	cnt-1
WBGene00000566	1787.98	-0.0564178	0.0943929	-0.597692	0.550046	0.683675	cnt-2
WBGene00000567	5319.99	-0.155582	0.0658462	-2.36281	0.0181369	0.0499165	cnx-1
WBGene00000583	80.1166	-0.195677	0.192611	-1.01592	0.309668	0.461329	cof-2
WBGene00000584	115.702	0.123129	0.193543	0.636182	0.524658	0.663709	cog-1
WBGene00000585	1323.69	-0.0781925	0.078955	-0.990343	0.322007	0.474129	cogc-2
WBGene00000591	420.208	0.915737	0.137195	6.67473	2.47691e-11	5.55289e-10	coh-1
WBGene00000592	651.469	-0.103924	0.0669889	-1.55136	0.120814	0.226949	coh-3
WBGene00000593	2.6575	1.12444	0.944242	1.19083	0.233719	0.375599	col-2
WBGene00000594	35240.4	-0.342825	0.173072	-1.98082	0.0476119	0.109735	col-3
WBGene00000596	10303.5	-0.438051	0.422434	-1.03697	0.29975	0.450284	col-7
WBGene00000597	5313.42	0.775648	0.585388	1.32502	0.185166	0.315404	col-8
WBGene00000598	0.876542	0.531111	1.55062	0.342515	0.731963	NA	col-9
WBGene00000599	23644.6	-0.640677	0.171239	-3.74141	0.000182991	0.000999051	col-10
WBGene00000601	55209.8	-0.638019	0.173252	-3.68261	0.000230859	0.00122249	col-12
WBGene00000602	28169.4	-0.684956	0.212808	-3.21866	0.00128791	0.00542977	col-13
WBGene00000603	29871.3	-0.583709	0.248533	-2.34861	0.0188435	0.0515539	col-14
WBGene00000606	10973.2	-0.572756	0.539548	-1.06155	0.288442	0.438217	col-17
WBGene00000608	31026.7	-0.168013	0.312645	-0.53739	0.590998	0.718067	col-19
WBGene00000609	31819.9	-0.0773323	0.315063	-0.245451	0.806108	0.878292	col-20
WBGene00000610	343.002	-0.177971	0.260638	-0.682827	0.494716	0.636969	col-33
WBGene00000611	1599.86	-0.203945	0.265153	-0.769161	0.441798	0.591476	col-34
WBGene00000612	3.47006	0.422774	0.81089	0.52137	0.602109	0.727068	col-35
WBGene00000613	1.20486	1.23995	1.23014	1.00798	0.313465	NA	col-36
WBGene00000614	0.508979	1.15056	3.22434	0.356836	0.721214	NA	col-37
WBGene00000615	32559.9	-0.575585	0.351113	-1.63932	0.101147	0.19829	col-38
WBGene00000616	21508.5	-0.222566	0.311532	-0.714423	0.474966	0.619992	col-39
WBGene00000617	1.89959	-0.593996	1.15151	-0.515842	0.605965	NA	col-40
WBGene00000618	53.5129	0.175654	0.539143	0.325803	0.744574	0.835301	col-41
WBGene00000620	33.8819	-0.424248	0.292158	-1.45212	0.146469	0.263215	col-43
WBGene00000621	3.22351	-2.01897	1.01186	-1.99532	0.0460085	0.106767	col-44
WBGene00000622	5.12461	-0.564105	0.625841	-0.901355	0.367399	0.520724	col-45
WBGene00000623	77.8536	1.47017	0.861584	1.70635	0.0879421	0.177663	col-46
WBGene00000624	24.2846	1.31918	0.858995	1.53572	0.124606	0.232766	col-47
WBGene00000625	10234.2	-0.600047	0.355597	-1.68744	0.0915196	0.183136	col-48
WBGene00000626	21822.9	-0.65904	0.326499	-2.01851	0.0435387	0.102198	col-49
WBGene00000627	0.675798	0.500768	1.69123	0.296096	0.767156	NA	col-50
WBGene00000628	1.90157	0.424573	0.959013	0.442719	0.657969	NA	col-51
WBGene00000629	1.8684	1.21452	1.14081	1.06462	0.287049	NA	col-52
WBGene00000630	43.2066	0.151406	0.2469	0.613227	0.539726	0.67641	col-53
WBGene00000631	184.01	-0.536523	0.242381	-2.21355	0.0268597	0.0690732	col-54
WBGene00000632	0.214634	1.60673	3.77236	0.425921	0.670165	NA	col-55
WBGene00000633	7.38412	0.0353941	0.64134	0.0551877	0.955989	0.973562	col-56
WBGene00000634	1661.53	-0.713254	0.204454	-3.48859	0.000485579	0.002336	col-58
WBGene00000636	18180.2	-0.497461	0.1033	-4.81569	1.46693e-06	1.37539e-05	col-60
WBGene00000637	213.276	-0.66839	0.156745	-4.26418	2.00633e-05	0.000143587	col-61
WBGene00000638	11309	-0.400659	0.406024	-0.986787	0.323747	0.475543	col-62
WBGene00000639	26797.9	-0.662861	0.472243	-1.40364	0.160425	0.282999	col-63
WBGene00000640	21.2362	-0.361327	0.31733	-1.13865	0.25485	0.400994	col-64
WBGene00000641	6772.85	-0.162864	0.166552	-0.977858	0.328145	0.480022	col-65
WBGene00000642	1.24966	0.604268	1.75948	0.343436	0.731271	NA	col-66
WBGene00000644	410.965	-0.52762	0.15855	-3.32779	0.000875377	0.00388216	col-68
WBGene00000645	200.824	-0.425369	0.194984	-2.18156	0.0291422	0.0736552	col-69
WBGene00000646	616.301	0.347958	0.202854	1.71531	0.0862881	0.174983	H17B01.2
WBGene00000647	39383.7	-0.000300976	0.306336	-0.000982502	0.999216	0.999567	col-71
WBGene00000648	1.58575	0.0153954	1.37929	0.0111618	0.991094	NA	col-72
WBGene00000649	57255.4	-0.535686	0.401238	-1.33508	0.18185	0.311339	col-73
WBGene00000650	8.92156	-0.631267	0.472646	-1.3356	0.18168	0.31111	col-74
WBGene00000651	22.0015	0.060008	0.412841	0.145354	0.884432	0.929369	col-75
WBGene00000652	3027.02	0.488511	0.129426	3.77445	0.000160364	0.000890312	col-76
WBGene00000653	50893.8	-0.419712	0.21711	-1.93317	0.0532147	0.12014	col-77
WBGene00000654	0.442461	-1.12283	2.24358	-0.500464	0.616748	NA	col-78
WBGene00000655	1367.27	-0.191044	0.689757	-0.276974	0.7818	0.861445	col-79
WBGene00000656	17944.6	0.282503	0.501827	0.562949	0.57347	0.705029	col-80
WBGene00000657	44309.5	-0.161749	0.304218	-0.531689	0.594941	0.721443	col-81
WBGene00000658	22.9112	-0.475724	0.308073	-1.54419	0.122541	0.229638	col-83
WBGene00000659	4.08143	-0.852133	0.953965	-0.893254	0.371721	0.524616	col-84
WBGene00000660	5.18438	-0.149207	0.672516	-0.221863	0.82442	0.890576	col-85
WBGene00000661	2.74165	1.00902	1.05328	0.95797	0.338078	0.490645	col-86
WBGene00000662	9.74554	0.0196631	0.472912	0.0415788	0.966834	0.980722	col-87
WBGene00000663	23156.2	-0.400645	0.155505	-2.57641	0.00998319	0.030389	col-88
WBGene00000664	977.248	-0.654047	0.20493	-3.19156	0.00141504	0.00588442	col-89
WBGene00000665	2922.56	-1.16465	0.164679	-7.07223	1.52465e-12	4.154e-11	col-90
WBGene00000666	10900.4	-0.429081	0.174394	-2.46041	0.0138777	0.0400122	col-91
WBGene00000667	34873.9	-0.21395	0.197875	-1.08124	0.279591	0.428373	col-92
WBGene00000668	41648.8	-0.0342414	0.242415	-0.141251	0.887672	0.931627	col-93
WBGene00000669	19077.1	-0.213123	0.193682	-1.10037	0.27117	0.41908	col-94
WBGene00000670	137.208	1.80462	0.685557	2.63234	0.00848	0.0265416	col-95
WBGene00000671	828.183	-0.630318	0.369772	-1.70461	0.088267	0.178235	col-96
WBGene00000672	26836.9	-0.571163	0.295799	-1.93091	0.0534937	0.120545	col-97
WBGene00000673	1855.39	1.57618	0.546951	2.88176	0.00395462	0.0139823	col-98
WBGene00000674	332.807	0.262984	0.255264	1.03024	0.302896	0.453812	col-99
WBGene00000675	1528.75	1.71938	0.659665	2.60644	0.00914891	0.0283187	col-101
WBGene00000676	0.811361	-0.837179	1.6021	-0.522551	0.601287	NA	col-102
WBGene00000677	2180.77	1.20394	0.52547	2.29117	0.0219536	0.0584984	col-103
WBGene00000678	20547.9	-0.513072	0.263105	-1.95007	0.0511683	0.116331	col-104
WBGene00000679	18.2451	0.112476	0.482844	0.232945	0.815804	0.885299	col-105
WBGene00000680	22113.9	0.230891	0.253334	0.911411	0.362079	0.515449	col-106
WBGene00000681	11584.4	-0.214894	0.20354	-1.05578	0.29107	0.441084	col-107
WBGene00000682	2.4531	-0.597509	0.968945	-0.616659	0.53746	NA	col-108
WBGene00000683	11613.7	-0.584049	0.410831	-1.42163	0.155134	0.275484	col-109
WBGene00000684	1592.27	-0.0720062	0.756415	-0.095194	0.924161	0.954598	col-110
WBGene00000685	2742.57	-0.155676	0.316379	-0.492056	0.622679	0.743877	col-111
WBGene00000687	3394.12	-0.559323	0.125071	-4.47203	7.74789e-06	6.11633e-05	col-113
WBGene00000688	23.4647	-0.347258	0.314563	-1.10394	0.269619	0.417353	col-114
WBGene00000689	1707.43	-0.547579	0.21776	-2.5146	0.0119167	0.0352446	col-115
WBGene00000690	4.61933	1.09792	0.819758	1.33932	0.180468	0.309718	col-116
WBGene00000691	30922	-0.452703	0.1634	-2.77052	0.00559668	0.0187283	col-117
WBGene00000692	3085.62	-0.429262	0.145911	-2.94194	0.00326165	0.0118829	col-118
WBGene00000693	18474.7	-0.428972	0.510059	-0.841023	0.400335	0.552371	col-119
WBGene00000694	14639.6	-0.613847	0.152014	-4.0381	5.38854e-05	0.000340809	col-120
WBGene00000695	1.84779	-0.813223	1.2475	-0.651882	0.514477	NA	col-121
WBGene00000696	36720.6	0.13374	0.273835	0.488396	0.62527	0.745851	col-122
WBGene00000697	23.0985	-2.33623	0.528181	-4.42316	9.72671e-06	7.47464e-05	col-123
WBGene00000698	60146.7	-0.0309836	0.294405	-0.105242	0.916184	0.949534	col-124
WBGene00000699	34300.9	-0.315572	0.193749	-1.62877	0.103362	0.201544	col-125
WBGene00000700	9290.52	-0.561022	0.30018	-1.86895	0.0616293	0.134478	col-126
WBGene00000702	106.878	1.68387	1.23102	1.36787	0.171354	0.297484	col-128
WBGene00000703	57640	0.0816101	0.292982	0.27855	0.78059	0.860589	col-129
WBGene00000704	9213.44	-0.625	0.222803	-2.80517	0.00502898	0.0171204	col-130
WBGene00000705	257.643	0.0740407	0.363077	0.203926	0.838412	0.900225	col-131
WBGene00000706	2.16204	0.592709	0.999957	0.592735	0.553359	NA	col-132
WBGene00000707	35362.6	-0.568625	0.15781	-3.60322	0.000314295	0.00160704	col-133
WBGene00000708	68.3763	0.120697	0.529576	0.227913	0.819714	0.888019	col-135
WBGene00000709	0.164469	0.309065	3.81693	0.0809723	0.935464	NA	col-136
WBGene00000710	6733.16	-0.645458	0.24027	-2.68638	0.00722303	0.023159	col-137
WBGene00000711	39740.8	-0.444212	0.324815	-1.36758	0.171442	0.297576	col-138
WBGene00000712	46398.5	0.0930342	0.304631	0.3054	0.760061	0.845726	col-139
WBGene00000713	34261.6	-0.00924342	0.285615	-0.0323632	0.974182	0.98479	col-140
WBGene00000714	186.787	-0.210897	0.255536	-0.825311	0.409195	0.560405	col-141
WBGene00000715	3948.63	0.60158	0.538625	1.11688	0.264046	0.411072	col-142
WBGene00000716	1421.98	1.88791	0.682603	2.76575	0.00567916	0.0189487	col-143
WBGene00000717	25398.1	-0.478587	0.16566	-2.88897	0.00386511	0.0137071	col-144
WBGene00000718	16027.9	-0.779673	0.185591	-4.20103	2.65707e-05	0.000183397	col-145
WBGene00000719	10701.7	-0.41018	0.329775	-1.24382	0.213567	0.350785	col-146
WBGene00000720	8458.81	0.274369	0.437802	0.626695	0.530859	0.669176	col-147
WBGene00000721	29.298	0.482619	0.316556	1.52459	0.127361	0.236422	col-148
WBGene00000722	3493.12	-0.372775	0.343059	-1.08662	0.277205	0.425815	col-149
WBGene00000723	2397.24	-0.882393	0.207839	-4.24555	2.18057e-05	0.000154685	col-150
WBGene00000724	5.41673	-0.346069	0.692075	-0.500046	0.617043	0.739502	col-151
WBGene00000725	1096.35	-0.0544186	0.139646	-0.38969	0.696765	0.799385	col-152
WBGene00000726	282.229	0.0838974	0.135716	0.618185	0.536454	0.673346	col-153
WBGene00000727	13330.5	-1.09617	0.216888	-5.05409	4.32442e-07	4.5489e-06	col-154
WBGene00000728	17365.1	-1.20157	0.235224	-5.10818	3.25276e-07	3.51244e-06	col-155
WBGene00000729	6841.34	-0.592106	0.217837	-2.71811	0.00656565	0.0214252	col-156
WBGene00000730	9250.59	-1.14352	0.281499	-4.06227	4.85979e-05	0.000312292	col-157
WBGene00000731	7.02662	1.54993	0.696026	2.22682	0.0259592	0.0672317	col-158
WBGene00000732	29564.4	-0.420683	0.200898	-2.09401	0.0362593	0.0881225	col-159
WBGene00000733	30027.9	-0.0910235	0.286291	-0.31794	0.75053	0.838761	col-160
WBGene00000734	36879.5	-0.617619	0.156422	-3.94843	7.86664e-05	0.000474024	col-161
WBGene00000735	21939.3	-0.588734	0.150003	-3.92482	8.67953e-05	0.000516989	col-162
WBGene00000736	3.15007	-1.12932	0.889444	-1.2697	0.204193	0.339189	col-163
WBGene00000737	0.975771	-0.682024	1.27794	-0.533689	0.593557	NA	col-164
WBGene00000738	0.504721	2.32302	1.78509	1.30134	0.19314	NA	col-165
WBGene00000739	8774.14	-0.416387	0.168295	-2.47415	0.0133554	0.0387286	col-166
WBGene00000740	26406.4	-0.488603	0.14873	-3.28518	0.00101918	0.00443697	col-167
WBGene00000741	11791.7	-0.492162	0.174807	-2.81545	0.00487083	0.0166317	col-168
WBGene00000742	3403.33	-0.381015	0.190881	-1.99609	0.0459238	0.106635	col-169
WBGene00000743	6259.06	-0.715871	0.157882	-4.5342	5.78218e-06	4.72166e-05	col-170
WBGene00000744	1.54136	-0.320513	1.12435	-0.285065	0.775595	NA	col-171
WBGene00000745	306.034	-5.01884e-05	0.315083	-0.000159286	0.999873	0.999873	col-172
WBGene00000746	1577.22	-0.134304	0.430825	-0.311737	0.75524	0.841932	col-173
WBGene00000747	794.219	-0.741269	0.24092	-3.07683	0.00209216	0.00818233	col-174
WBGene00000748	25609.5	-0.32232	0.294925	-1.09289	0.274443	0.422338	col-175
WBGene00000749	311.905	1.25372	0.970825	1.29139	0.196567	0.330053	col-176
WBGene00000750	63.605	0.573578	0.217971	2.63145	0.00850223	0.0266014	col-177
WBGene00000751	29426	-0.179631	0.291667	-0.615876	0.537977	0.674861	col-178
WBGene00000752	5404.45	0.103452	0.428169	0.241614	0.809079	0.880294	col-179
WBGene00000753	12428.2	-0.768835	0.172404	-4.45949	8.21546e-06	6.43783e-05	col-180
WBGene00000754	45370.3	0.0752207	0.269416	0.279199	0.780092	0.860206	col-181
WBGene00000755	1522.53	-0.36011	0.417937	-0.861637	0.388887	0.541211	col-182
WBGene00000756	2.73734	-0.0219458	0.88343	-0.0248416	0.980181	0.988303	col-183
WBGene00000757	25913.4	0.119039	0.266878	0.446042	0.655567	0.768954	col-184
WBGene00000758	0.377691	-1.81534	2.57931	-0.703806	0.481553	NA	col-185
WBGene00000759	360.159	-0.197484	0.124944	-1.58057	0.113975	0.217062	col-186
WBGene00000760	14.9084	-0.264846	0.407168	-0.650459	0.515396	0.655511	col-187
WBGene00000761	1314.24	-0.0415208	0.0667185	-0.622329	0.533725	0.671106	coq-1
WBGene00000762	578.856	-0.215828	0.0662538	-3.2576	0.0011236	0.0048215	coq-2
WBGene00000763	511.82	-0.24449	0.110258	-2.21743	0.0265935	0.0685131	coq-3
WBGene00000764	273.177	-0.0855666	0.120382	-0.710792	0.477213	0.622071	coq-4
WBGene00000765	1012.3	-0.450114	0.0812383	-5.54066	3.01332e-08	3.93852e-07	coq-5
WBGene00000766	862.387	0.0683957	0.0708369	0.965539	0.334275	0.486614	coq-6
WBGene00000767	1823.47	-0.46335	0.0551873	-8.39596	4.62105e-17	2.2363e-15	coq-8
WBGene00000768	1098.32	-0.0591427	0.070461	-0.839368	0.401263	0.553098	cor-1
WBGene00000770	847.3	-0.0790039	0.068391	-1.15518	0.248017	0.39314	cpb-1
WBGene00000771	637.218	-0.385382	0.111773	-3.44789	0.000564982	0.00266393	cpb-2
WBGene00000772	3241.99	0.0993718	0.0785569	1.26497	0.205883	0.3414	cpb-3
WBGene00000773	1062.8	-0.15694	0.0898129	-1.74741	0.0805665	0.165741	cpf-1
WBGene00000774	834.804	0.0034859	0.0685743	0.050834	0.959458	0.976027	cpf-2
WBGene00000775	262.035	-0.305632	0.164794	-1.85462	0.0636499	0.137907	cpin-1
WBGene00000776	22917.9	0.224403	0.274834	0.816504	0.414212	0.565522	cpl-1
WBGene00000777	4143.54	-0.0739032	0.0985385	-0.749993	0.453259	0.60084	cpn-1
WBGene00000778	518.561	-0.516562	0.27026	-1.91135	0.055959	0.124912	cpn-2
WBGene00000779	10688.1	0.26204	0.0818591	3.20111	0.00136901	0.00573348	cpn-3
WBGene00000780	1578.73	-0.122295	0.0855699	-1.42918	0.152952	0.272231	cpn-4
WBGene00000781	1904.92	0.29564	0.14288	2.06914	0.0385325	0.0925159	cpr-1
WBGene00000782	1.01889	0.88944	1.43486	0.61988	0.535337	NA	cpr-2
WBGene00000783	1119.51	2.1704	0.186889	11.6133	3.52665e-31	6.21089e-29	cpr-3
WBGene00000784	12351.1	-0.034791	0.155787	-0.223325	0.823283	0.88991	cpr-4
WBGene00000785	8874.75	-0.555149	0.140742	-3.94444	7.99866e-05	0.000481064	cpr-5
WBGene00000786	24972.6	0.235146	0.231848	1.01423	0.310475	0.462017	cpr-6
WBGene00000787	1239.54	0.133323	0.0558669	2.38643	0.0170128	0.0473725	cps-6
WBGene00000788	11865.9	0.213514	0.26916	0.793259	0.427627	0.578517	cpz-1
WBGene00000789	6170.41	0.49925	0.116784	4.27497	1.91164e-05	0.000137733	cpz-2
WBGene00000792	505.684	0.032902	0.221204	0.148741	0.881758	0.927875	crb-1
WBGene00000793	723.649	0.327068	0.0970389	3.37048	0.000750365	0.00339742	crh-1
WBGene00000794	1394.89	0.264047	0.097466	2.70912	0.00674618	0.0219139	crn-1
WBGene00000795	297.713	0.00241215	0.0983676	0.0245218	0.980436	0.988315	crn-2
WBGene00000796	2195.92	-0.213576	0.073882	-2.89077	0.00384299	0.0136373	crn-3
WBGene00000797	151.131	-0.0232203	0.266532	-0.0871203	0.930576	0.958495	crn-4
WBGene00000798	415.074	-0.306572	0.102017	-3.0051	0.00265497	0.00999447	crn-5
WBGene00000799	358.728	0.346989	0.101381	3.42263	0.00062018	0.00288753	crn-6
WBGene00000800	4957.43	-0.176718	0.0451723	-3.9121	9.14968e-05	0.000541406	cars-1
WBGene00000801	165.927	1.4139	0.149639	9.44877	3.42846e-21	2.67436e-19	cars-2
WBGene00000802	48972.3	-0.251381	0.0971192	-2.58838	0.00964284	0.0295213	crt-1
WBGene00000803	180.27	0.810967	0.157414	5.15182	2.57972e-07	2.85423e-06	csb-1
WBGene00000804	687.996	0.11616	0.105178	1.10441	0.269416	0.417189	csc-1
WBGene00000812	1266.8	-0.124742	0.0646125	-1.93061	0.0535313	0.120548	csk-1
WBGene00000813	1176.37	-0.109426	0.0611996	-1.78801	0.073774	0.15456	csn-1
WBGene00000814	1936.15	0.0247092	0.0607177	0.406952	0.684043	0.789749	csn-2
WBGene00000815	1280.58	-0.234429	0.0761776	-3.0774	0.00208814	0.00817596	csn-3
WBGene00000816	1205.43	-0.128562	0.0840509	-1.52957	0.126122	0.234752	csn-4
WBGene00000817	1137.53	0.102989	0.0816398	1.2615	0.207128	0.342865	csn-5
WBGene00000818	1154.69	0.0307251	0.0650503	0.472328	0.636693	0.754378	csn-6
WBGene00000819	27.6601	1.10632	0.3241	3.41352	0.0006413	0.00297295	csp-1
WBGene00000820	169.528	-0.943646	0.263672	-3.57887	0.000345086	0.001738	csp-2
WBGene00000821	8.00191	-1.28831	0.601958	-2.1402	0.0323385	0.0802496	csp-3
WBGene00000822	7579.98	0.133817	0.0689283	1.9414	0.0522104	0.118322	csq-1
WBGene00000829	19782.5	0.129542	0.134594	0.96247	0.335814	0.488281	ctb-1
WBGene00000830	1328.92	0.320553	0.141605	2.26371	0.0235922	0.0621377	ctl-1
WBGene00000831	2270.38	0.450522	0.114677	3.92861	8.54378e-05	0.000509436	ctl-2
WBGene00000832	627.309	0.136454	0.150417	0.907171	0.364316	0.5176	ctn-1
WBGene00000833	19150	-0.364576	0.0610207	-5.97463	2.30609e-09	3.79893e-08	cts-1
WBGene00000834	2552.95	-0.199104	0.0906277	-2.19695	0.0280242	0.0715066	cua-1
WBGene00000835	1673.91	-0.810621	0.19332	-4.19315	2.75111e-05	0.000188895	cuc-1
WBGene00000836	2382.84	-0.227408	0.0491752	-4.62445	3.7559e-06	3.21292e-05	cul-1
WBGene00000837	3144.78	-0.0107857	0.0706398	-0.152686	0.878646	0.9258	cul-2
WBGene00000838	4261.56	-0.372668	0.0679572	-5.48387	4.16121e-08	5.28127e-07	cul-3
WBGene00000839	1429.05	-0.083238	0.068521	-1.21478	0.22445	0.364276	cul-4
WBGene00000840	1595.63	-0.0812811	0.0727012	-1.11802	0.26356	0.410441	cul-5
WBGene00000841	204.056	0.223893	0.167967	1.33296	0.182545	0.312342	cul-6
WBGene00000843	2427.9	-0.0159287	0.113621	-0.140191	0.888509	0.932105	cup-2
WBGene00000845	241.08	-0.134885	0.118617	-1.13715	0.255478	0.401686	cup-4
WBGene00000846	1021.56	0.0628239	0.113654	0.552762	0.580426	0.710317	cup-5
WBGene00000851	2.08803	0.928504	1.21493	0.764243	0.444723	NA	cut-1
WBGene00000853	63.1732	0.847181	0.520046	1.62905	0.103302	0.201497	cut-6
WBGene00000854	695.936	-0.356842	0.0842984	-4.23308	2.30517e-05	0.000162455	cux-7
WBGene00000857	251.647	0.117937	0.126366	0.933296	0.350667	0.503498	cwn-1
WBGene00000858	127.564	0.396295	0.217223	1.82437	0.0680958	0.144873	cwn-2
WBGene00000859	0.0971116	0	3.81693	0	1	NA	cwp-1
WBGene00000860	0.241934	0.309062	3.61357	0.0855284	0.931841	NA	cwp-2
WBGene00000861	0.32206	-1.97857	3.35875	-0.589081	0.555807	NA	cwp-3
WBGene00000862	21.5043	0.542036	0.297433	1.82238	0.0683978	0.145401	cwp-4
WBGene00000863	992.19	-0.124275	0.105938	-1.17309	0.24076	0.384239	cya-1
WBGene00000864	32.0709	-0.696942	0.288683	-2.41421	0.0157692	0.0445339	cya-2
WBGene00000865	5362.84	-0.216817	0.0948504	-2.28589	0.022261	0.0591238	cyb-1
WBGene00000866	1270.73	0.304496	0.226296	1.34557	0.178443	0.306983	cyb-2.1
WBGene00000867	1758.98	0.20335	0.194992	1.04286	0.297011	0.44735	cyb-2.2
WBGene00000868	4097.51	0.204433	0.174667	1.17042	0.241833	0.385591	cyb-3
WBGene00000869	11085	-0.345536	0.0851066	-4.06004	4.90642e-05	0.00031439	cyc-1
WBGene00000870	57.013	1.22893	0.357947	3.43327	0.000596352	0.0027888	cyd-1
WBGene00000871	1712.09	0.0735892	0.109874	0.66976	0.503011	0.643955	cye-1
WBGene00000872	1397.67	-0.0498049	0.064096	-0.777036	0.437138	0.587262	cyk-1
WBGene00000874	2104.78	-0.130466	0.054054	-2.41362	0.015795	0.0445846	cyk-3
WBGene00000875	2783.42	-0.17075	0.0631941	-2.70199	0.00689254	0.0223087	cyk-4
WBGene00000876	1752.86	0.0551348	0.0502357	1.09752	0.272413	0.420383	cyl-1
WBGene00000877	3440.11	-0.635394	0.0845464	-7.51533	5.67687e-14	1.91656e-12	cyn-1
WBGene00000878	1692.32	-0.503475	0.0640001	-7.86679	3.63858e-15	1.41268e-13	cyn-2
WBGene00000879	6392.66	-0.217439	0.0758674	-2.86604	0.00415646	0.0145591	cyn-3
WBGene00000880	865.931	-0.0239916	0.0780934	-0.307216	0.758679	0.844773	cyn-4
WBGene00000881	12680.2	-0.139447	0.107951	-1.29176	0.19644	0.329872	cyn-5
WBGene00000882	1514.86	0.559589	0.316211	1.76967	0.076782	0.159434	cyn-6
WBGene00000883	26396.2	-0.476841	0.0716527	-6.65489	2.83514e-11	6.29815e-10	cyn-7
WBGene00000884	267.446	0.395577	0.166992	2.36884	0.0178438	0.0492211	cyn-8
WBGene00000885	577.34	-0.310736	0.0912094	-3.40684	0.000657201	0.00303678	cyn-9
WBGene00000886	361.081	0.0994211	0.133057	0.747209	0.454937	0.602282	cyn-10
WBGene00000887	520.422	-0.148146	0.0676891	-2.18862	0.0286248	0.0726593	cyn-11
WBGene00000888	575.87	-0.209798	0.0872612	-2.40425	0.0162056	0.0454955	cyn-12
WBGene00000889	1211.66	-0.123176	0.0519228	-2.37229	0.0176781	0.048906	cyn-13
WBGene00000890	778.518	-0.162169	0.0855075	-1.89655	0.0578871	0.128442	sig-7
WBGene00000891	1232.1	-0.05127	0.0630059	-0.813733	0.415798	0.567083	cyn-15
WBGene00000892	675.364	-0.00613688	0.0684217	-0.089692	0.928532	0.957452	cyn-16
WBGene00000893	878.088	0.0301262	0.503943	0.0597809	0.95233	0.971263	cyn-17
WBGene00000894	4981.41	0.156494	0.0822995	1.90151	0.057235	0.127228	dab-1
WBGene00000895	168.45	-0.20004	0.140306	-1.42574	0.153943	0.273737	dac-1
WBGene00000896	2492.72	-0.240466	0.0870527	-2.7623	0.00573954	0.0191165	dad-1
WBGene00000897	391.102	0.217102	0.0913999	2.3753	0.0175349	0.0485649	daf-1
WBGene00000898	1821.99	0.359718	0.0852595	4.21909	2.45292e-05	0.000171734	daf-2
WBGene00000899	636.593	0.529828	0.102965	5.14571	2.6651e-07	2.92784e-06	daf-3
WBGene00000900	523.288	0.353977	0.0968315	3.6556	0.000256585	0.00134044	daf-4
WBGene00000901	1181.6	0.70292	0.107739	6.5243	6.83178e-11	1.44261e-09	daf-5
WBGene00000902	276.185	0.294476	0.394109	0.747195	0.454946	0.602282	daf-6
WBGene00000903	262.809	0.518394	0.124285	4.171	3.03262e-05	0.000205907	daf-7
WBGene00000904	315.394	0.229172	0.12561	1.82446	0.0680822	0.144873	daf-8
WBGene00000905	71.169	0.289572	0.176034	1.64498	0.0999733	0.19653	daf-9
WBGene00000906	45.2087	0.350021	0.238754	1.46603	0.142639	0.257919	daf-10
WBGene00000907	31.262	0.518807	0.262783	1.97428	0.0483497	0.111016	daf-11
WBGene00000908	826.689	0.18086	0.0876941	2.06239	0.0391704	0.0937708	daf-12
WBGene00000910	369.39	0.276777	0.105744	2.61743	0.00885942	0.0275374	daf-14
WBGene00000911	3136.11	-0.08587	0.0468221	-1.83396	0.0666594	0.142717	daf-15
WBGene00000912	3438.11	0.172335	0.0979868	1.75875	0.0786195	0.162342	daf-16
WBGene00000913	2997.39	0.23237	0.177642	1.30808	0.190847	0.322445	daf-18
WBGene00000914	249.918	0.411712	0.100996	4.07653	4.57119e-05	0.000296293	daf-19
WBGene00000915	67613.7	-0.534076	0.101799	-5.24637	1.55128e-07	1.79496e-06	daf-21
WBGene00000917	519.11	-0.0938348	0.0725439	-1.29349	0.195842	0.329061	daf-25
WBGene00000920	133.244	0.697667	0.152988	4.56026	5.10892e-06	4.21825e-05	daf-28
WBGene00000923	1465.23	-0.586621	0.0975779	-6.01183	1.83446e-09	3.06336e-08	daf-31
WBGene00000928	2435.82	0.716098	0.919225	0.779023	0.435966	0.586195	dao-2
WBGene00000929	1232.38	0.181916	0.24663	0.737606	0.460754	0.606639	dao-3
WBGene00000930	1975.97	-0.20612	0.604624	-0.340906	0.733175	0.82754	dao-4
WBGene00000931	9932.44	-0.293273	0.075703	-3.874	0.000107064	0.0006202	dao-5
WBGene00000932	137.191	-0.349263	0.217913	-1.60276	0.108987	0.210043	dao-6
WBGene00000933	1496.66	-0.400656	0.0582975	-6.87261	6.30391e-12	1.55396e-10	dap-3
WBGene00000934	104.703	0.319854	0.154746	2.06696	0.0387383	0.0928665	dat-1
WBGene00000935	3308.68	-0.00619728	0.0893972	-0.069323	0.944732	0.966978	daz-1
WBGene00000936	288.073	0.259307	0.0952443	2.72255	0.00647807	0.0211718	dbl-1
WBGene00000937	600.432	0.0880473	0.0892433	0.986598	0.32384	0.475638	dbr-1
WBGene00000938	2233.81	-0.0134824	0.0584946	-0.23049	0.817711	0.886311	dcp-66
WBGene00000939	2866.87	-0.0855064	0.0556805	-1.53566	0.124621	0.232769	dcr-1
WBGene00000940	672.256	-0.161308	0.0905056	-1.7823	0.0747008	0.156065	dcs-1
WBGene00000941	1243.74	-0.408331	0.0936811	-4.35873	1.3082e-05	9.78455e-05	ddp-1
WBGene00000942	6300.42	-0.0561713	0.135359	-0.414981	0.678156	0.785154	deb-1
WBGene00000950	175.316	0.117247	0.157634	0.743795	0.457001	0.604252	deg-1
WBGene00000951	153.217	0.343482	0.118718	2.89326	0.00381269	0.0135354	deg-3
WBGene00000952	39.6922	0.147161	0.219263	0.671162	0.502118	0.643468	del-1
WBGene00000953	36.5979	0.381504	0.222908	1.71149	0.0869913	0.1762	del-2
WBGene00000955	207.486	0.152673	0.123058	1.24066	0.21473	0.352275	des-2
WBGene00000958	383.133	0.45239	0.0784382	5.76747	8.0471e-09	1.20798e-07	dgk-1
WBGene00000959	1178.57	-0.034442	0.0989914	-0.347929	0.727893	0.823811	dgk-2
WBGene00000960	19.3478	-0.13641	0.30882	-0.441714	0.658696	0.771066	dgk-3
WBGene00000961	1559.89	-0.10319	0.0753567	-1.36935	0.17089	0.296913	dgn-1
WBGene00000962	13250.9	-0.170669	0.0885196	-1.92804	0.0538505	0.121155	dhc-1
WBGene00000963	452.44	-0.011202	0.115081	-0.0973407	0.922456	0.953604	dhp-1
WBGene00000964	508.631	0.149636	0.141883	1.05464	0.291589	0.441637	dhp-2
WBGene00000965	874.347	0.154899	0.0814786	1.90111	0.0572882	0.12733	dhs-1
WBGene00000966	502.648	-0.056146	0.0770333	-0.728853	0.466091	0.611727	dhs-2
WBGene00000967	4214.28	0.170308	0.0984506	1.72989	0.0836508	0.170811	dhs-3
WBGene00000968	63.5613	0.572182	0.173849	3.29126	0.000997402	0.00435325	dhs-4
WBGene00000969	295.19	0.34124	0.1352	2.52396	0.0116042	0.0344937	dhs-5
WBGene00000970	1756.26	0.0599705	0.0744973	0.805002	0.420818	0.572041	dhs-6
WBGene00000971	420.935	0.226211	0.199063	1.13638	0.255799	0.40197	dhs-7
WBGene00000972	6.87426	-0.541952	0.572855	-0.946054	0.344121	0.496925	dhs-8
WBGene00000973	844.745	-0.0604015	0.167828	-0.3599	0.718922	0.816832	dhs-9
WBGene00000974	432.543	-0.280222	0.0982284	-2.85276	0.0043341	0.0150916	dhs-11
WBGene00000975	984.26	-0.287324	0.0891593	-3.22259	0.00127035	0.00536617	dhs-12
WBGene00000976	1528.12	-0.00090147	0.0649629	-0.0138767	0.988928	0.993057	dhs-13
WBGene00000977	641.302	0.265069	0.071409	3.71199	0.00020564	0.0011047	dhs-14
WBGene00000978	25.1354	-0.0736307	0.434557	-0.169439	0.865452	0.917495	dhs-15
WBGene00000979	54.8193	1.27475	0.597968	2.1318	0.0330236	0.0815587	dhs-16
WBGene00000980	120.948	0.470363	0.191075	2.46166	0.0138296	0.039887	dhs-17
WBGene00000981	442.931	0.155077	0.116829	1.32738	0.184383	0.314448	dhs-18
WBGene00000982	790.597	0.486707	0.194474	2.50268	0.0123255	0.0362155	dhs-19
WBGene00000983	405.278	0.421184	0.138655	3.03765	0.00238435	0.00913269	dhs-20
WBGene00000984	2697.51	-0.248185	0.17281	-1.43618	0.150951	0.26969	dhs-21
WBGene00000985	1983.3	-0.0315115	0.0814439	-0.38691	0.698823	0.8011	dhs-22
WBGene00000986	49.7037	-1.22422	0.298109	-4.10662	4.01488e-05	0.000264098	dhs-23
WBGene00000987	1399.87	-0.300906	0.0511329	-5.88478	3.98575e-09	6.31619e-08	dhs-24
WBGene00000988	757.284	-0.519986	0.101264	-5.13494	2.82227e-07	3.08069e-06	dhs-25
WBGene00000989	21.8337	0.95949	0.400823	2.3938	0.016675	0.0465609	dhs-26
WBGene00000990	133.541	0.537536	0.212598	2.52842	0.0114579	0.0340986	dhs-27
WBGene00000991	5236.25	-0.0344505	0.103125	-0.334065	0.738331	0.831657	dhs-28
WBGene00000992	279.141	0.259248	0.215675	1.20203	0.229351	0.370357	dhs-29
WBGene00000993	686.162	-0.0990754	0.0692853	-1.42996	0.152728	0.272031	dhs-30
WBGene00000994	761.245	-0.151472	0.0692288	-2.18799	0.0286706	0.0727247	dic-1
WBGene00000995	626.136	0.270973	0.208735	1.29816	0.194231	0.327288	die-1
WBGene00000996	2031.39	-0.173902	0.112243	-1.54933	0.121301	0.227613	dif-1
WBGene00000998	5120.64	-0.114191	0.131931	-0.865535	0.386745	0.539237	dig-1
WBGene00001000	17469.1	-0.0552685	0.0574276	-0.962402	0.335848	0.488281	dim-1
WBGene00001001	2476.96	-0.293357	0.0496058	-5.91376	3.34378e-09	5.37365e-08	dis-3
WBGene00001002	999.967	-0.153534	0.07694	-1.99551	0.0459875	0.10674	div-1
WBGene00001005	7544.22	-0.339724	0.0623201	-5.45128	5.00098e-08	6.28637e-07	dlc-1
WBGene00001006	3027.06	0.393216	0.195339	2.013	0.0441151	0.103264	dlg-1
WBGene00001007	1688.17	-0.176301	0.0622559	-2.83188	0.00462747	0.0159796	dli-1
WBGene00001008	1484.12	0.0354138	0.105397	0.336003	0.736868	0.830612	dlk-1
WBGene00001016	1182.16	0.169992	0.0671154	2.53283	0.0113144	0.0337379	dna-2
WBGene00001017	3256.08	-0.005894	0.0613708	-0.0960391	0.92349	0.954269	dnc-1
WBGene00001018	1167.98	-0.0880189	0.0613534	-1.43462	0.151395	0.270333	dnc-2
WBGene00001019	1706.7	-0.262876	0.0716201	-3.67042	0.000242155	0.00127441	dnj-1
WBGene00001020	1120.52	-0.251711	0.128055	-1.96565	0.0493391	0.112835	dnj-2
WBGene00001021	155.218	-0.275305	0.117057	-2.3519	0.0186779	0.0511666	dnj-3
WBGene00001022	328.534	0.376833	0.104788	3.59616	0.000322949	0.00164587	dnj-4
WBGene00001023	4669.16	-0.0899244	0.097242	-0.924749	0.355097	0.508208	dnj-5
WBGene00001025	2206.08	-0.261062	0.148235	-1.76113	0.0782161	0.161627	dnj-7
WBGene00001026	1552.77	0.112392	0.0722475	1.55565	0.119791	0.225529	dnj-8
WBGene00001027	1115.38	-0.392486	0.0632012	-6.2101	5.29493e-10	9.55157e-09	dnj-9
WBGene00001028	1354.56	-0.345344	0.0684999	-5.04152	4.61838e-07	4.83134e-06	dnj-10
WBGene00001029	3346.21	-0.428087	0.0743991	-5.75393	8.7192e-09	1.29548e-07	dnj-11
WBGene00001030	6114.47	-0.180418	0.100479	-1.79558	0.0725613	0.152505	dnj-12
WBGene00001031	3646.53	-0.440122	0.115692	-3.80426	0.000142226	0.000798701	dnj-13
WBGene00001032	670.675	0.379273	0.0699391	5.42291	5.86372e-08	7.32236e-07	dnj-14
WBGene00001033	397.245	-0.180232	0.0789914	-2.28166	0.0225093	0.0597054	dnj-15
WBGene00001034	1178.36	-0.198964	0.0634496	-3.13579	0.00171393	0.0069363	dnj-16
WBGene00001035	859.935	-0.204633	0.0778888	-2.62724	0.00860806	0.0268783	dnj-17
WBGene00001036	325.019	-0.15982	0.104196	-1.53384	0.12507	0.233351	dnj-18
WBGene00001037	6633.16	-0.205615	0.0797212	-2.57918	0.00990364	0.0301952	dnj-19
WBGene00001038	9627.03	-0.0429319	0.0918249	-0.467541	0.640113	0.756816	dnj-20
WBGene00001039	377.824	-0.588146	0.0934759	-6.29196	3.13491e-10	5.90449e-09	dnj-21
WBGene00001040	954.438	0.0521131	0.119	0.437926	0.66144	0.772751	dnj-22
WBGene00001041	844.673	0.0613892	0.0947679	0.647784	0.517124	0.656708	dnj-23
WBGene00001042	929.197	0.00667894	0.0638404	0.104619	0.916678	0.949823	dnj-24
WBGene00001043	1814.5	-0.223888	0.0715991	-3.12697	0.00176616	0.00711085	dnj-25
WBGene00001044	243.363	-0.29096	0.163636	-1.77809	0.0753889	0.157115	dnj-26
WBGene00001045	724.155	-0.0909805	0.257406	-0.353452	0.72375	0.820589	dnj-27
WBGene00001046	612.179	-0.438617	0.0815509	-5.37844	7.51323e-08	9.24036e-07	dnj-28
WBGene00001047	6088.67	-0.155529	0.0723616	-2.14933	0.0316082	0.0787807	dnj-29
WBGene00001048	617.741	-0.280933	0.0847979	-3.31298	0.000923086	0.00406629	dnj-30
WBGene00001049	959.014	-0.140619	0.0636332	-2.20984	0.0271161	0.0695846	dog-1
WBGene00001050	411.7	0.00297373	0.0894555	0.0332425	0.973481	0.984387	dom-3
WBGene00001051	1274.16	-0.130227	0.145852	-0.89287	0.371927	0.524746	cks-1
WBGene00001052	82.5067	0.222553	0.159691	1.39365	0.163424	0.287249	dop-1
WBGene00001053	174.904	0.411661	0.139565	2.94961	0.00318176	0.0116564	dop-2
WBGene00001054	473.316	0.0415692	0.150068	0.277002	0.781779	0.861445	dpf-1
WBGene00001055	980.336	0.205348	0.262777	0.781453	0.434536	0.584917	dpf-2
WBGene00001056	3776.91	-0.141941	0.0468294	-3.03102	0.00243732	0.0093043	dpf-3
WBGene00001057	1797.15	-0.232292	0.0520005	-4.46712	7.928e-06	6.23259e-05	dpf-4
WBGene00001058	3985.4	0.0221133	0.0489713	0.451555	0.651589	0.76613	dpf-5
WBGene00001059	501.372	0.690276	0.603334	1.1441	0.252581	0.398342	dpf-6
WBGene00001060	762.664	-0.151155	0.0842445	-1.79424	0.0727744	0.152822	dpf-7
WBGene00001061	960.878	0.0506644	0.104438	0.485113	0.627596	0.747697	dpl-1
WBGene00001062	0.153772	0	3.81693	0	1	NA	dpr-1
WBGene00001063	46.7231	0.677869	0.335359	2.02132	0.0432463	0.101704	dpy-1
WBGene00001064	591.999	0.786657	1.03476	0.760232	0.447116	0.596027	dpy-2
WBGene00001065	432.851	0.616327	1.1837	0.520677	0.602592	0.727343	dpy-3
WBGene00001066	29689.4	-0.376604	0.409633	-0.919368	0.357903	0.511031	dpy-4
WBGene00001067	26781.1	-0.410821	0.340556	-1.20633	0.227692	0.368514	dpy-5
WBGene00001068	105.516	1.42977	0.69657	2.05259	0.040112	0.0955963	dpy-6
WBGene00001069	566.841	0.801329	1.14291	0.701133	0.48322	0.627448	dpy-7
WBGene00001070	868.539	0.800981	0.983322	0.814566	0.415321	0.566551	dpy-8
WBGene00001071	649.197	1.24477	1.16217	1.07107	0.284138	0.433503	dpy-9
WBGene00001072	654.658	0.782378	1.03411	0.756575	0.449304	0.597592	dpy-10
WBGene00001073	5950.69	-0.217869	0.322974	-0.674572	0.499947	0.64162	dpy-11
WBGene00001074	29568.4	-0.242446	0.35213	-0.688511	0.491131	0.633829	dpy-13
WBGene00001075	4.55924	0.278709	0.631117	0.441613	0.658769	0.771066	dpy-14
WBGene00001076	28.8304	0.0924197	0.291274	0.317294	0.75102	0.838942	dpy-17
WBGene00001077	8456.26	-0.71298	0.175212	-4.06923	4.71681e-05	0.000304355	dpy-18
WBGene00001078	114.005	0.278716	0.287528	0.969351	0.33237	0.484543	dpy-19
WBGene00001079	184.075	0.374256	0.34229	1.09339	0.274223	0.422152	dpy-20
WBGene00001080	1355.38	-0.172733	0.0776605	-2.2242	0.0261349	0.0676151	dpy-21
WBGene00001081	2396.28	0.157456	0.0710355	2.21658	0.0266515	0.068619	dpy-22
WBGene00001082	1069.67	0.116583	0.117363	0.993352	0.320538	0.472618	dpy-23
WBGene00001085	2308.21	0.0291745	0.0483417	0.603506	0.546172	0.680792	dpy-26
WBGene00001086	1005.59	0.437751	0.154593	2.83164	0.00463098	0.0159885	dpy-27
WBGene00001087	1434.96	-0.136719	0.0503311	-2.71638	0.00659996	0.0215289	dpy-28
WBGene00001088	1756.82	-0.12136	0.103336	-1.17442	0.240227	0.383497	dpy-30
WBGene00001089	1916.94	0.23378	0.213797	1.09347	0.274189	0.422152	dre-1
WBGene00001090	1074.5	-0.222716	0.0729343	-3.05364	0.0022608	0.00871671	drh-1
WBGene00001091	2282.49	0.21088	0.128617	1.6396	0.101088	0.198196	drh-2
WBGene00001092	529.704	-0.160111	0.103325	-1.54959	0.121239	0.227527	dro-1
WBGene00001093	2229.36	-0.0883723	0.0708358	-1.24757	0.21219	0.34917	drp-1
WBGene00001094	6418.62	-0.322418	0.0498883	-6.46281	1.0278e-10	2.10525e-09	dars-1
WBGene00001095	622.517	-0.323598	0.0739398	-4.37651	1.20596e-05	9.06751e-05	dars-2
WBGene00001096	7.24259	0.294551	0.51168	0.575656	0.564848	0.697234	dsc-1
WBGene00001099	4507.5	0.0344988	0.140911	0.244827	0.80659	0.87865	dsc-4
WBGene00001101	625.738	0.442428	0.0805522	5.49244	3.96409e-08	5.04986e-07	dsh-1
WBGene00001102	1067.03	0.00205337	0.145277	0.0141341	0.988723	0.993025	dsh-2
WBGene00001103	1.08761	-0.4196	1.20851	-0.347204	0.728438	NA	dsl-1
WBGene00001104	1.64886	1.43127	1.33409	1.07285	0.28334	NA	dsl-2
WBGene00001105	5.30872	-0.578579	0.586906	-0.985812	0.324226	0.475928	dsl-3
WBGene00001106	0.974629	-2.65152	1.8505	-1.43287	0.151896	NA	dsl-4
WBGene00001107	1.66188	1.72693	1.15287	1.49794	0.134148	NA	dsl-5
WBGene00001108	0.581893	-0.804046	1.92702	-0.417249	0.676496	NA	dsl-6
WBGene00001109	118.434	-0.0472119	0.186802	-0.252737	0.800471	0.874605	dsl-7
WBGene00001110	623.667	-0.145091	0.130997	-1.10759	0.268039	0.415622	duo-1
WBGene00001111	7.83669	0.37451	0.499484	0.749794	0.453379	0.600948	duo-2
WBGene00001112	1249.28	-0.0430522	0.0970192	-0.44375	0.657224	0.770314	duo-3
WBGene00001113	2003.27	0.146221	0.188867	0.774203	0.438811	0.588554	dur-1
WBGene00001115	139.528	-0.0877553	0.317477	-0.276415	0.78223	0.861729	dyb-1
WBGene00001116	448.089	0.25373	0.0784699	3.23347	0.00122295	0.00518788	dyc-1
WBGene00001117	48.1584	0.159974	0.193506	0.826714	0.408399	0.559761	dyf-1
WBGene00001118	73.8828	0.516179	0.180239	2.86386	0.00418518	0.0146447	dyf-2
WBGene00001119	75.4703	-1.13944	0.374019	-3.04648	0.00231539	0.00889651	dyf-3
WBGene00001121	31.7174	0.524765	0.264901	1.98098	0.047593	0.109706	dyf-5
WBGene00001122	42.202	0.257284	0.283255	0.908313	0.363713	0.517003	dyf-6
WBGene00001123	197.39	0.163348	0.109651	1.4897	0.136303	0.249141	dyf-7
WBGene00001127	20.6006	0.539548	0.318992	1.69141	0.090758	0.182017	dyf-11
WBGene00001129	13.9011	0.212505	0.369018	0.575865	0.564706	0.697193	dyf-13
WBGene00001130	1840.37	0.163389	0.08071	2.02439	0.0429297	0.1011	dyn-1
WBGene00001131	3498.14	0.346131	0.106201	3.25919	0.0011173	0.00480052	dys-1
WBGene00001132	7116.78	-0.0675723	0.0937789	-0.720548	0.471187	0.616212	alp-1
WBGene00001133	21.7084	0.221674	0.312516	0.70932	0.478126	0.622854	eat-2
WBGene00001134	2629.98	-0.185393	0.062601	-2.96151	0.00306137	0.0112807	eat-3
WBGene00001135	106.418	0.0143983	0.142623	0.100954	0.919587	0.95164	eat-4
WBGene00001136	35.7525	0.184489	0.242942	0.759394	0.447617	0.596172	eat-5
WBGene00001137	31693.8	-0.0665894	0.0766843	-0.868358	0.385198	0.537698	eat-6
WBGene00001145	762.781	0.181906	0.0898323	2.02495	0.0428728	0.100992	eat-16
WBGene00001147	16.6155	0.308281	0.432	0.713613	0.475466	0.62057	eat-18
WBGene00001148	1266.1	0.00424463	0.303359	0.0139921	0.988836	0.993057	eat-20
WBGene00001149	4367.58	-0.336566	0.122482	-2.74788	0.00599819	0.0198426	bcat-1
WBGene00001150	233.166	-0.0614644	0.181811	-0.338067	0.735313	0.82932	ech-1.1
WBGene00001151	720.633	-0.47853	0.0677235	-7.06594	1.5953e-12	4.33267e-11	ech-2
WBGene00001152	265.089	0.0109106	0.105294	0.103621	0.91747	0.950406	ech-3
WBGene00001153	2544.08	-0.0370476	0.0776628	-0.477031	0.63334	0.751813	ech-4
WBGene00001154	1671.94	-0.4915	0.0538273	-9.13105	6.7839e-20	4.69188e-18	ech-5
WBGene00001155	3807.37	-0.636262	0.0930892	-6.83497	8.20236e-12	1.96523e-10	ech-6
WBGene00001156	649.825	-0.87735	0.336714	-2.60562	0.00917075	0.0283812	ech-7
WBGene00001157	333.912	0.410588	0.0942386	4.3569	1.3192e-05	9.86254e-05	ech-8
WBGene00001158	423.892	3.42194	0.318548	10.7423	6.44043e-27	8.52883e-25	ech-9
WBGene00001159	241.267	-0.0215996	0.214757	-0.100577	0.919886	0.951697	eff-1
WBGene00001160	1903.82	0.296836	0.0687716	4.31626	1.58694e-05	0.000116401	efk-1
WBGene00001161	645.971	0.0112619	0.102716	0.109641	0.912694	0.947124	efl-1
WBGene00001162	337.567	-0.227443	0.115047	-1.97695	0.0480472	0.11044	efl-2
WBGene00001163	233.476	-0.0637547	0.117898	-0.540761	0.588672	0.716645	efn-2
WBGene00001164	97.0382	-0.276758	0.149905	-1.84622	0.0648599	0.139806	efn-3
WBGene00001165	91.8235	-0.029761	0.185789	-0.160188	0.872733	0.922638	efn-4
WBGene00001166	3942.99	-0.308984	0.0567874	-5.44106	5.29634e-08	6.63324e-07	eftu-2
WBGene00001167	135105	-0.170507	0.0534015	-3.19292	0.00140843	0.00586403	eef-2
WBGene00001168	226696	-0.562136	0.0990889	-5.67305	1.40279e-08	1.97559e-07	eef-1A.1
WBGene00001169	26269.9	-0.118655	0.134445	-0.882551	0.377479	0.530389	eef-1A.2
WBGene00001170	11.6457	0.14521	0.437753	0.331716	0.740103	0.832885	egl-1
WBGene00001171	141.46	0.27956	0.131712	2.12251	0.0337947	0.0830907	egl-2
WBGene00001172	2821.12	0.677112	0.0661297	10.2391	1.32403e-24	1.37917e-22	egl-3
WBGene00001173	7518.75	0.272821	0.0759648	3.59141	0.00032889	0.00167066	egl-4
WBGene00001174	58.4456	0.475445	0.189296	2.51164	0.0120171	0.0354678	egl-5
WBGene00001175	29.9668	0.27909	0.275024	1.01478	0.310209	0.461773	egl-6
WBGene00001177	2993.99	0.0608437	0.0681178	0.893214	0.371743	0.524616	egl-8
WBGene00001178	622.252	0.275448	0.10145	2.71511	0.00662545	0.0215915	egl-9
WBGene00001179	910.57	0.189338	0.0786703	2.40673	0.0160961	0.0452773	egl-10
WBGene00001182	706.005	0.367697	0.124469	2.95413	0.00313549	0.0115067	egl-13
WBGene00001184	452.593	0.446742	0.2124	2.1033	0.0354393	0.086487	egl-15
WBGene00001185	62.8482	0.15431	0.17561	0.878704	0.379562	0.532352	egl-17
WBGene00001186	152.364	0.30632	0.189372	1.61756	0.105758	0.20518	egl-18
WBGene00001187	1564.04	0.0871305	0.139456	0.624788	0.53211	0.66997	egl-19
WBGene00001188	183.053	0.148709	0.112981	1.31624	0.188094	0.318993	egl-20
WBGene00001189	2686.81	0.632174	0.0576323	10.9691	5.38101e-28	7.59701e-26	egl-21
WBGene00001190	201.211	0.334672	0.125732	2.66178	0.00777293	0.024672	egl-23
WBGene00001193	226.606	0.290144	0.12133	2.39137	0.0167858	0.0468088	egl-26
WBGene00001194	2607.8	0.280624	0.0926245	3.02969	0.00244801	0.00933885	egl-27
WBGene00001196	4636.62	-0.0194489	0.109955	-0.17688	0.859602	0.913609	egl-30
WBGene00001202	108.902	0.407674	0.160575	2.53884	0.011122	0.0332978	egl-36
WBGene00001204	45.6066	0.0231581	0.246475	0.093957	0.925143	0.955284	egl-38
WBGene00001207	107.257	0.544043	0.187867	2.89589	0.00378085	0.0134335	egl-43
WBGene00001208	1169.64	0.48078	0.0835951	5.7513	8.85591e-09	1.3121e-07	egl-44
WBGene00001209	8621.41	-0.204522	0.04559	-4.48612	7.25329e-06	5.78468e-05	egl-45
WBGene00001210	20.6923	0.826824	0.320404	2.58057	0.00986384	0.0301008	egl-46
WBGene00001211	32.512	0.202202	0.257952	0.783874	0.433114	0.583509	egl-47
WBGene00001214	2269.91	-0.538796	0.0536033	-10.0515	9.04362e-24	9.08778e-22	ego-1
WBGene00001215	2470.55	-0.294445	0.134528	-2.18872	0.028617	0.0726503	ego-2
WBGene00001223	0.067215	0.309071	3.81693	0.0809737	0.935463	NA	ehn-3
WBGene00001224	1165.62	-0.00017753	0.067563	-0.00262762	0.997903	0.998938	ehs-1
WBGene00001225	6637.96	-0.160643	0.0564592	-2.8453	0.00443695	0.0153964	eif-3.B
WBGene00001226	9249.62	-0.488914	0.0956163	-5.11329	3.16597e-07	3.4274e-06	eif-3.C
WBGene00001227	5294.19	-0.305078	0.0675456	-4.51663	6.28324e-06	5.08704e-05	eif-3.D
WBGene00001228	4523.43	-0.26444	0.0625617	-4.22686	2.36976e-05	0.000166595	eif-3.E
WBGene00001229	3491.67	-0.543624	0.0485906	-11.1878	4.67667e-29	7.13317e-27	eif-3.F
WBGene00001230	2932.75	-0.396177	0.074125	-5.34471	9.05596e-08	1.09254e-06	eif-3.G
WBGene00001231	3217.39	-0.350741	0.0700499	-5.00702	5.52783e-07	5.68182e-06	eif-3.H
WBGene00001232	4367.98	-0.314494	0.0799696	-3.93267	8.40063e-05	0.000501601	eif-3.I
WBGene00001233	2561.07	-0.393797	0.0512952	-7.67708	1.62752e-14	5.86561e-13	eif-3.K
WBGene00001234	1930.05	-0.18652	0.0760025	-2.45413	0.0141226	0.0406224	eif-6
WBGene00001235	474.596	0.232186	0.106958	2.17083	0.0299442	0.0753034	elb-1
WBGene00001236	634.136	-0.0701035	0.0842374	-0.832213	0.405289	0.557227	elc-1
WBGene00001237	2.97213	-0.0890154	1.03108	-0.0863321	0.931202	0.958875	elc-2
WBGene00001239	10529.3	-0.299958	0.129278	-2.32027	0.0203264	0.0549012	elo-1
WBGene00001240	2392.02	-0.744868	0.334574	-2.22632	0.0259931	0.0672889	elo-2
WBGene00001241	2925.28	0.0161158	0.108159	0.149001	0.881553	0.927815	elo-3
WBGene00001242	430.14	-0.232761	0.342178	-0.680234	0.496356	0.638306	elo-4
WBGene00001243	3907.88	-0.769063	0.25885	-2.97107	0.00296761	0.0109779	elo-5
WBGene00001244	7693.44	-0.621911	0.225805	-2.75419	0.00588373	0.0195315	elo-6
WBGene00001245	310.257	-0.733238	0.184366	-3.97709	6.97649e-05	0.000426707	elo-7
WBGene00001246	408.817	-0.733274	0.106121	-6.90981	4.85313e-12	1.21563e-10	elo-8
WBGene00001247	463.645	-0.185967	0.16676	-1.11518	0.264773	0.411828	elo-9
WBGene00001248	463.814	0.241779	0.0780035	3.09959	0.0019379	0.00767745	elp-1
WBGene00001249	267.87	-0.216776	0.102523	-2.11442	0.0344794	0.0846402	elt-1
WBGene00001250	574.722	0.147245	0.167204	0.880629	0.378518	0.53128	elt-2
WBGene00001251	575.69	0.133544	0.206726	0.645996	0.518282	0.657884	elt-3
WBGene00001252	19.1086	0.651387	0.339956	1.91609	0.0553531	0.12385	elt-4
WBGene00001253	52.854	0.269495	0.221564	1.21633	0.223861	0.363484	elt-6
WBGene00001258	3778.23	-0.327556	0.0625225	-5.239	1.61446e-07	1.85597e-06	emb-4
WBGene00001259	5455.96	-0.125885	0.0583843	-2.15615	0.0310718	0.077659	emb-5
WBGene00001262	4390.56	-0.173085	0.0647243	-2.67419	0.00749106	0.0239017	emb-8
WBGene00001263	43462.8	-0.413521	0.165581	-2.49739	0.012511	0.036647	emb-9
WBGene00001281	1077.6	-0.0509186	0.0820999	-0.620203	0.535124	0.672221	emb-27
WBGene00001284	1562.35	-0.197947	0.0638682	-3.0993	0.0019398	0.0076832	emb-30
WBGene00001303	6864.64	-0.399507	0.10263	-3.89269	9.91402e-05	0.000579409	emo-1
WBGene00001309	869.846	-0.00793005	0.0851299	-0.0931524	0.925783	0.955624	emr-1
WBGene00001310	2.26734	-0.354001	0.924561	-0.382885	0.701805	NA	end-1
WBGene00001311	1.99722	0.437713	1.01324	0.431994	0.665746	NA	end-3
WBGene00001320	3206.94	0.111449	0.0822819	1.35448	0.175583	0.303368	ent-1
WBGene00001324	1141.36	0.14974	0.0993434	1.50729	0.131736	0.242583	eor-1
WBGene00001325	312.146	0.356295	0.129859	2.74371	0.00607494	0.0200383	eor-2
WBGene00001328	12303.9	-0.124929	0.127929	-0.976555	0.32879	0.48076	epi-1
WBGene00001329	2512.81	0.233756	0.173953	1.34379	0.179017	0.307661	epn-1
WBGene00001330	4009.4	0.168813	0.121639	1.38782	0.165191	0.289443	eps-8
WBGene00001331	2588.08	-0.295527	0.170286	-1.73548	0.0826563	0.169165	erd-2
WBGene00001332	577.319	-0.000272438	0.0851839	-0.00319824	0.997448	0.99863	eri-1
WBGene00001333	10113.2	0.0446632	0.0654632	0.682264	0.495072	0.63723	erm-1
WBGene00001334	2057.03	-0.250812	0.109352	-2.29363	0.0218118	0.0581931	ero-1
WBGene00001335	237.97	0.278936	0.118287	2.35813	0.018367	0.0504769	F35A5.8
WBGene00001336	4384.32	-0.0652311	0.0597986	-1.09085	0.275341	0.423408	qars-1
WBGene00001337	7012.28	-0.404081	0.0428299	-9.43455	3.92686e-21	3.0464e-19	ears-1
WBGene00001338	574.042	-0.0144116	0.0786504	-0.183236	0.854613	0.910354	ears-2
WBGene00001340	2114.69	0.186444	0.0759537	2.45471	0.0141	0.0405643	etr-1
WBGene00001345	1159.89	0.213415	0.0904716	2.35892	0.0183282	0.0503943	fos-1
WBGene00001352	1942.63	-0.132937	0.0710499	-1.87103	0.0613405	0.134125	evl-14
WBGene00001358	270.116	-0.207023	0.107945	-1.91786	0.0551283	0.123477	evl-20
WBGene00001365	682.478	-0.278047	0.0742265	-3.74593	0.00017973	0.000983765	exc-4
WBGene00001366	566.983	0.320069	0.0989963	3.23314	0.00122436	0.00519259	exc-5
WBGene00001368	759.737	0.124259	0.149698	0.830069	0.4065	0.558084	exc-7
WBGene00001371	1095.69	-0.12234	0.068962	-1.77403	0.0760586	0.158144	exl-1
WBGene00001372	1053.42	-0.0956093	0.138061	-0.692514	0.488615	0.631631	exo-3
WBGene00001373	43.4304	0.0809875	0.204637	0.395761	0.692281	0.795964	exp-1
WBGene00001374	215.415	0.0792895	0.104827	0.756384	0.449419	0.597605	exp-2
WBGene00001377	39.6478	-0.10213	0.298693	-0.341924	0.732408	0.826948	eya-1
WBGene00001385	21315.6	-0.0640838	0.0986691	-0.649482	0.516027	0.655863	far-1
WBGene00001386	68623.6	0.139161	0.108566	1.28181	0.199911	0.333921	far-2
WBGene00001387	591.934	1.70588	0.37433	4.55716	5.18494e-06	4.27482e-05	far-3
WBGene00001388	1.07532	0.99655	1.38242	0.720872	0.470988	NA	far-4
WBGene00001389	140.431	0.092898	0.192655	0.4822	0.629664	0.749116	far-5
WBGene00001390	1487.82	0.302951	0.0684814	4.42385	9.69582e-06	7.45762e-05	far-6
WBGene00001391	103.363	0.0436926	0.296716	0.147254	0.882932	0.928421	far-7
WBGene00001392	1754.98	-0.529839	0.0577041	-9.182	4.23159e-20	2.96263e-18	far-8
WBGene00001393	13597.6	0.635433	0.089105	7.13129	9.94355e-13	2.78012e-11	fat-1
WBGene00001394	15805	0.909881	0.138178	6.58483	4.5541e-11	9.81056e-10	fat-2
WBGene00001395	2656.66	0.73085	0.161505	4.52524	6.03261e-06	4.91207e-05	fat-3
WBGene00001396	7372.18	0.587069	0.108382	5.41669	6.07126e-08	7.55943e-07	fat-4
WBGene00001397	839.325	2.29836	0.368938	6.22967	4.67418e-10	8.51269e-09	fat-5
WBGene00001398	9357.9	0.476656	0.276163	1.72599	0.0843485	0.171928	fat-6
WBGene00001399	342.484	1.15719	0.348879	3.31688	0.000910273	0.00401399	fat-7
WBGene00001400	10.0602	1.02568	0.508149	2.01847	0.0435424	0.102198	fax-1
WBGene00001401	790.45	-0.328316	0.0802396	-4.0917	4.28231e-05	0.000279837	fbf-1
WBGene00001402	761.145	-0.71071	0.10009	-7.1007	1.24122e-12	3.41997e-11	fbf-2
WBGene00001403	1674.64	0.181407	0.205441	0.883015	0.377228	0.530152	fbl-1
WBGene00001404	3465.25	0.105182	0.100423	1.0474	0.294917	0.445162	fbp-1
WBGene00001405	2406.65	-0.131036	0.0648533	-2.02049	0.0433326	0.101823	fce-1
WBGene00001406	516.446	-0.427992	0.0851129	-5.02852	4.94268e-07	5.14225e-06	fce-2
WBGene00001410	1015.03	0.0208335	0.177728	0.117221	0.906685	0.943467	feh-1
WBGene00001411	1558.9	-0.131134	0.048785	-2.688	0.00718823	0.0230604	fem-1
WBGene00001412	1473.7	0.228347	0.088972	2.56651	0.0102728	0.0311375	fem-2
WBGene00001413	448.002	-0.0476796	0.191697	-0.248725	0.803574	0.876817	fem-3
WBGene00001414	784.556	-0.690467	0.191098	-3.61316	0.000302485	0.00155596	fer-1
WBGene00001423	16513.3	-0.509556	0.071922	-7.08485	1.39198e-12	3.82303e-11	fib-1
WBGene00001424	207.041	-0.392805	0.121637	-3.22931	0.00124088	0.0052548	fis-1
WBGene00001425	331.149	-0.163397	0.0871945	-1.87394	0.0609392	0.133516	fis-2
WBGene00001426	2560.77	-0.100076	0.0844279	-1.18534	0.235883	0.377774	fkb-1
WBGene00001427	7978.81	-0.115867	0.0992673	-1.16722	0.243121	0.387321	fkb-2
WBGene00001428	2549.11	-0.425697	0.335586	-1.26852	0.204612	0.339787	fkb-3
WBGene00001429	585.198	-0.24475	0.377488	-0.648366	0.516748	0.656377	fkb-4
WBGene00001430	1612.27	-0.0865732	0.681126	-0.127103	0.898859	0.938489	fkb-5
WBGene00001431	5935.39	-0.448975	0.0614572	-7.30549	2.76252e-13	8.54931e-12	fkb-6
WBGene00001432	49.8055	0.70518	0.708048	0.99595	0.319274	0.471284	fkb-7
WBGene00001433	193.853	0.257906	0.106386	2.42424	0.0153406	0.0434717	fkb-8
WBGene00001434	3.9338	0.615094	0.791285	0.777335	0.436961	0.587154	fkh-2
WBGene00001435	16.5594	1.54861	0.644932	2.40119	0.0163418	0.0457725	fkh-3
WBGene00001436	2.46573	1.40475	1.28187	1.09586	0.273139	NA	fkh-4
WBGene00001437	4.29173	0.786184	0.709271	1.10844	0.267672	0.41516	fkh-5
WBGene00001438	256.08	0.0664113	0.141912	0.467974	0.639803	0.756646	fkh-6
WBGene00001439	492.84	0.428252	0.172069	2.48884	0.0128161	0.0374059	fkh-7
WBGene00001440	28.6475	0.704051	0.249791	2.81856	0.00482397	0.0165212	fkh-8
WBGene00001441	1754.75	-0.0354164	0.08541	-0.414663	0.678388	0.785302	fkh-9
WBGene00001442	15.7253	1.24555	0.409939	3.03838	0.00237851	0.00911237	fkh-10
WBGene00001443	2055.94	0.00611341	0.0490902	0.124534	0.900892	0.939959	fli-1
WBGene00001444	597.181	0.62231	0.109739	5.67083	1.42109e-08	1.99971e-07	flp-1
WBGene00001445	140.776	0.532516	0.146174	3.64303	0.000269443	0.00140076	flp-2
WBGene00001446	413.746	0.897373	0.0968414	9.26642	1.92505e-20	1.38758e-18	flp-3
WBGene00001447	151.002	0.489268	0.132201	3.70095	0.000214792	0.00114801	flp-4
WBGene00001448	371.541	0.533966	0.105861	5.04402	4.5585e-07	4.77454e-06	flp-5
WBGene00001449	494.804	0.61628	0.0729066	8.45301	2.83897e-17	1.40983e-15	flp-6
WBGene00001450	187.274	0.726801	0.14084	5.16047	2.46325e-07	2.736e-06	flp-7
WBGene00001451	369.998	0.870453	0.134163	6.48805	8.69569e-11	1.80388e-09	flp-8
WBGene00001452	697.094	0.34969	0.0912949	3.83033	0.000127972	0.000725571	flp-9
WBGene00001453	487.63	0.186074	0.0938988	1.98165	0.0475187	0.109594	flp-10
WBGene00001454	451.03	0.512298	0.0957122	5.35249	8.67521e-08	1.05329e-06	flp-11
WBGene00001455	433.507	0.440307	0.0895233	4.91835	8.72763e-07	8.59827e-06	flp-12
WBGene00001456	335.683	0.304285	0.13465	2.25981	0.0238328	0.0626266	flp-13
WBGene00001457	642.085	0.804875	0.113932	7.06451	1.61186e-12	4.37069e-11	flp-14
WBGene00001458	193.784	0.778203	0.120486	6.45884	1.05506e-10	2.15593e-09	flp-15
WBGene00001459	368.09	0.374507	0.101568	3.68724	0.000226699	0.00120457	flp-16
WBGene00001460	300.464	0.76091	0.124591	6.10726	1.01359e-09	1.76504e-08	flp-17
WBGene00001461	464.16	0.567519	0.0848915	6.68523	2.3057e-11	5.18949e-10	flp-18
WBGene00001462	272.023	0.48661	0.11397	4.26963	1.95798e-05	0.000140539	flp-19
WBGene00001463	100.702	0.645902	0.188988	3.41768	0.000631575	0.00293264	flp-20
WBGene00001464	118.176	0.562958	0.139942	4.02278	5.75142e-05	0.000360159	flp-21
WBGene00001465	303.112	0.162215	0.101412	1.59957	0.109693	0.210904	flr-1
WBGene00001466	127.578	0.190669	0.179687	1.06112	0.288635	0.438328	flr-2
WBGene00001468	124.093	-0.262528	0.154776	-1.69618	0.0898523	0.180667	flr-4
WBGene00001470	356.75	0.625559	0.0962281	6.50079	7.98979e-11	1.67062e-09	baz-2
WBGene00001475	222.186	0.472704	0.214923	2.19941	0.0278487	0.0711865	fmi-1
WBGene00001476	1006.18	0.129004	0.19791	0.651833	0.514509	0.654611	fmo-1
WBGene00001477	21.1571	-2.4005	0.430651	-5.57411	2.48792e-08	3.30748e-07	fmo-2
WBGene00001478	512.908	0.219006	0.168536	1.29946	0.193786	0.326702	fmo-3
WBGene00001479	2367.74	-0.0462539	0.189851	-0.243633	0.807515	0.879377	fmo-4
WBGene00001480	635.52	-0.180557	0.107507	-1.67949	0.0930564	0.185537	fmo-5
WBGene00001481	191.809	0.136939	0.229446	0.596826	0.550624	0.684244	fog-1
WBGene00001482	327.916	-0.0838622	0.192424	-0.435819	0.662968	0.774075	fog-2
WBGene00001483	36.8467	-0.767878	0.466559	-1.64583	0.0997984	0.196299	fog-3
WBGene00001484	174.176	0.60952	0.109277	5.57773	2.43676e-08	3.24452e-07	fox-1
WBGene00001485	737.021	0.0565237	0.0627416	0.900897	0.367643	0.52094	fre-1
WBGene00001486	248.993	-0.202471	0.0918361	-2.2047	0.0274752	0.0704003	frh-1
WBGene00001487	419.645	-0.510069	0.0984025	-5.18349	2.17767e-07	2.44357e-06	frk-1
WBGene00001488	16245.4	0.0459138	0.0453682	1.01203	0.311525	0.463006	frm-1
WBGene00001489	1147.37	0.0722504	0.146701	0.492499	0.622367	0.743717	frm-2
WBGene00001490	402.9	0.0937555	0.110503	0.848445	0.39619	0.548026	frm-3
WBGene00001491	2767.71	0.103057	0.0846065	1.21808	0.223195	0.362656	frm-4
WBGene00001492	1551.43	0.235451	0.100803	2.33575	0.0195045	0.0530903	frm-5.1
WBGene00001493	2206.32	0.0850236	0.107114	0.793771	0.427329	0.578337	frm-7
WBGene00001494	244.235	0.111221	0.0984397	1.12984	0.258543	0.404755	frm-8
WBGene00001495	234.825	0.13724	0.141445	0.970272	0.331911	0.483957	frm-9
WBGene00001496	1339.11	0.28435	0.120177	2.36611	0.0179763	0.0495065	frm-10
WBGene00001497	3605.47	-0.36628	0.0484291	-7.56324	3.93165e-14	1.34868e-12	fars-1
WBGene00001498	3964.04	-0.464925	0.056611	-8.21263	2.16402e-16	9.50333e-15	fars-3
WBGene00001499	1008.28	0.112937	0.14871	0.759441	0.447589	0.596172	fsn-1
WBGene00001500	65.7937	0.514309	0.422067	1.21855	0.223015	0.362538	ftn-1
WBGene00001501	8076.05	-0.103025	0.137458	-0.749504	0.453554	0.601067	ftn-2
WBGene00001502	12483.2	0.186624	0.083984	2.22214	0.0262738	0.0679128	ftt-2
WBGene00001503	7633.26	-0.237942	0.0635572	-3.74375	0.000181296	0.000991064	fum-1
WBGene00001505	482.669	0.000801649	0.0772001	0.010384	0.991715	0.994656	fut-1
WBGene00001506	178.349	0.511212	0.168588	3.03232	0.0024268	0.00926827	fut-2
WBGene00001507	52.0567	-0.0169659	0.261489	-0.0648818	0.948268	0.969203	fut-4
WBGene00001508	712.418	0.0460584	0.0818313	0.562845	0.57354	0.705029	fut-8
WBGene00001509	1621.89	-0.0884501	0.0445597	-1.98498	0.047147	0.108972	fzo-1
WBGene00001510	1897.27	-0.0170321	0.0884671	-0.192525	0.847331	0.905859	fzr-1
WBGene00001511	2021.07	0.0206469	0.112533	0.183474	0.854426	0.910354	fzy-1
WBGene00001512	37.8854	0.321746	0.224433	1.4336	0.151687	0.270743	gab-1
WBGene00001513	1173.95	0.0178771	0.0879016	0.203377	0.83884	0.900573	gad-1
WBGene00001514	1577.02	-0.319638	0.109188	-2.92741	0.00341802	0.0123551	xnd-1
WBGene00001515	202.78	0.179594	0.102479	1.75249	0.0796901	0.164176	gap-1
WBGene00001516	1672.31	0.0779983	0.132291	0.589598	0.55546	0.688202	gap-2
WBGene00001517	141.359	0.346544	0.137947	2.51214	0.012	0.0354359	gar-1
WBGene00001518	193.548	0.313253	0.198502	1.57809	0.114546	0.217845	gar-2
WBGene00001519	168.552	0.539804	0.137921	3.91387	9.08274e-05	0.000537818	gar-3
WBGene00001520	5133.65	-0.106586	0.0961066	-1.10904	0.267414	0.414917	gas-1
WBGene00001522	293.14	0.372321	0.123823	3.00688	0.00263943	0.00994251	gbh-1
WBGene00001523	489.6	0.326345	0.0997034	3.27316	0.00106354	0.00459961	gbh-2
WBGene00001526	2136.81	-0.021004	0.0378912	-0.554324	0.579357	0.70946	gck-1
WBGene00001527	2784.11	0.0543891	0.044443	1.2238	0.221029	0.360217	gcs-1
WBGene00001528	1.41613	0.168521	1.40203	0.120198	0.904326	NA	gcy-1
WBGene00001529	23.0927	-0.461854	0.309568	-1.49193	0.135718	0.248257	gcy-2
WBGene00001530	5.65277	0.88919	0.605513	1.46849	0.141971	0.257107	gcy-3
WBGene00001531	3.4176	0.898732	0.788616	1.13963	0.25444	0.400571	gcy-4
WBGene00001532	12.4177	-0.289477	0.483907	-0.598208	0.549701	0.683446	gcy-5
WBGene00001533	6.2123	1.01836	0.583638	1.74484	0.0810123	0.166498	gcy-6
WBGene00001534	15.8361	0.872691	0.450123	1.93878	0.0525278	0.118883	gcy-7
WBGene00001535	33.991	0.577932	0.25039	2.30813	0.0209919	0.0564508	gcy-8
WBGene00001536	30.3727	0.360365	0.239369	1.50548	0.132201	0.243282	gcy-9
WBGene00001537	144.252	0.703852	0.122964	5.72406	1.04009e-08	1.5083e-07	gcy-11
WBGene00001538	2525.95	-0.125378	0.0937097	-1.33794	0.180916	0.310038	gcy-12
WBGene00001539	1.50774	-1.13431	1.17689	-0.963817	0.335138	NA	gcy-13
WBGene00001540	2.76492	0.0190904	0.984329	0.0193944	0.984527	0.990674	gcy-14
WBGene00001541	104.726	1.01811	0.150497	6.76501	1.33298e-11	3.09813e-10	gcy-15
WBGene00001542	11.4868	0.573648	0.447525	1.28182	0.199904	0.333921	gcy-17
WBGene00001543	57.0092	-0.180844	0.219879	-0.822469	0.41081	0.561969	gcy-18
WBGene00001544	42.8719	0.527272	0.209566	2.51602	0.011869	0.0351297	gcy-19
WBGene00001545	4.83859	0.436344	0.718387	0.607394	0.543589	0.67906	gcy-20
WBGene00001546	94.8366	1.0852	0.203346	5.33672	9.46421e-08	1.13777e-06	gcy-21
WBGene00001547	103.89	0.290862	0.386665	0.752232	0.451912	0.599566	gcy-22
WBGene00001548	34.3266	0.526997	0.239905	2.19669	0.0280429	0.0715225	gcy-23
WBGene00001549	3.55957	-0.389616	0.876327	-0.444601	0.656608	0.769859	gcy-25
WBGene00001550	2.52599	2.43454	1.07568	2.26325	0.0236201	0.0621825	gcy-27
WBGene00001551	18.3787	-0.192375	0.348669	-0.551741	0.581126	0.711028	gcy-31
WBGene00001552	25.0642	0.872335	0.289886	3.00924	0.00261904	0.0098788	gcy-32
WBGene00001553	22.5992	1.25454	0.389106	3.22416	0.00126341	0.00534097	gcy-33
WBGene00001554	8.63968	0.345696	0.454934	0.759882	0.447325	0.596105	gcy-34
WBGene00001555	54.2767	0.497838	0.26411	1.88496	0.0594348	0.131077	gcy-35
WBGene00001556	28.4354	0.696767	0.314313	2.21679	0.0266375	0.0686036	gcy-36
WBGene00001557	33.2923	0.561527	0.249326	2.25218	0.0243111	0.063668	gcy-37
WBGene00001558	11548.4	-0.113811	0.0746601	-1.52438	0.127413	0.236483	gdi-1
WBGene00001559	1966.2	0.113039	0.113435	0.996508	0.319003	0.471005	gei-1
WBGene00001560	4330.78	0.0674093	0.066785	1.00935	0.312808	0.464266	gei-3
WBGene00001561	2267.31	0.0770017	0.0993798	0.774823	0.438445	0.588277	gei-4
WBGene00001562	2022	0.423175	0.063219	6.6938	2.17451e-11	4.90067e-10	lin-66
WBGene00001563	1579.55	-0.00589361	0.0827532	-0.0712192	0.943223	0.965954	gei-6
WBGene00001564	14928.7	0.602563	0.168355	3.57911	0.000344768	0.00173753	icl-1
WBGene00001565	1352.42	0.0424553	0.076516	0.554855	0.578994	0.709232	gei-8
WBGene00001566	1206.75	-0.511292	0.0606723	-8.42711	3.54315e-17	1.74431e-15	acdh-13
WBGene00001568	2041.96	-0.246727	0.04617	-5.34389	9.09751e-08	1.096e-06	snpc-4
WBGene00001569	320.828	0.539749	0.313952	1.71921	0.085577	0.173789	meg-3
WBGene00001570	906.63	0.543178	0.231824	2.34306	0.0191265	0.0522112	gei-13
WBGene00001571	787.153	-0.38687	0.111352	-3.47431	0.000512175	0.002443	gei-14
WBGene00001572	900.096	0.158813	0.0627638	2.53033	0.0113954	0.0339674	gei-15
WBGene00001574	2594.62	-0.0120847	0.0570308	-0.211898	0.832187	0.895907	gei-17
WBGene00001575	36.979	0.201584	0.368346	0.547268	0.584195	0.713149	gei-18
WBGene00001577	180.77	0.727882	0.186105	3.91113	9.18644e-05	0.000543205	gem-4
WBGene00001578	1066.46	-0.168295	0.0849012	-1.98224	0.0474519	0.109484	ges-1
WBGene00001579	1071.28	0.0562442	0.0798104	0.704722	0.480983	0.6256	gex-2
WBGene00001580	1403.41	-0.283969	0.0764801	-3.71298	0.00020483	0.0011007	gex-3
WBGene00001581	39710.5	-0.176564	0.140243	-1.25898	0.208036	0.344069	gfi-1
WBGene00001582	2730.4	0.103261	0.0518941	1.98984	0.0466085	0.107947	gfi-2
WBGene00001583	200.694	0.374192	0.114524	3.26736	0.00108555	0.00467823	gfi-3
WBGene00001584	1685.08	-0.0941214	0.0630028	-1.49392	0.135196	0.247517	nrde-4
WBGene00001585	388.696	0.0129575	0.0899604	0.144036	0.885472	0.929776	gfl-1
WBGene00001586	29.6383	0.589713	0.286796	2.05621	0.0397619	0.0949208	ggr-1
WBGene00001587	42.1391	0.366417	0.265334	1.38096	0.167291	0.292003	ggr-2
WBGene00001588	40.589	0.107319	0.208913	0.513699	0.607463	0.731011	ggr-3
WBGene00001589	1154.11	-0.181369	0.0573001	-3.16526	0.00154945	0.00635943	gip-1
WBGene00001590	210.563	-0.223604	0.115983	-1.9279	0.0538676	0.121173	C45G3.3
WBGene00001591	463.288	0.963514	0.114841	8.38999	4.86199e-17	2.33964e-15	glc-1
WBGene00001592	200.106	0.394739	0.233364	1.69152	0.0907377	0.182017	glc-2
WBGene00001593	25.6837	0.0796791	0.267203	0.298197	0.765553	0.84985	glc-3
WBGene00001594	135.262	0.119834	0.138326	0.866316	0.386317	0.538863	glc-4
WBGene00001595	14700.3	-0.094279	0.113464	-0.830915	0.406021	0.557696	gld-1
WBGene00001596	5506.6	-0.136193	0.0412351	-3.30283	0.000957132	0.00420115	gld-2
WBGene00001597	2929.88	0.11527	0.150261	0.767131	0.443004	0.592672	gld-3
WBGene00001598	13256.7	-0.734885	0.056344	-13.0428	6.98128e-39	2.38522e-36	glh-1
WBGene00001599	3388.95	0.106544	0.129614	0.822009	0.411072	0.562203	glh-2
WBGene00001600	932.487	-0.18403	0.0989511	-1.85981	0.0629124	0.136682	glh-3
WBGene00001601	4207.61	-0.505183	0.0770619	-6.55554	5.54406e-11	1.18386e-09	glh-4
WBGene00001602	480.264	-0.496636	0.0815946	-6.08663	1.15313e-09	1.9785e-08	gln-1
WBGene00001603	1675.77	-0.651398	0.0721633	-9.02672	1.76896e-19	1.17129e-17	gln-2
WBGene00001604	8847.05	0.4458	0.145579	3.06225	0.00219681	0.00850593	gln-3
WBGene00001605	189.823	-0.696411	0.171207	-4.06766	4.74885e-05	0.0003059	gln-4
WBGene00001606	1462.15	0.534749	0.276472	1.93419	0.05309	0.119913	gln-5
WBGene00001607	2970.35	0.350651	0.232315	1.50938	0.131203	0.241866	gln-6
WBGene00001608	108.684	-0.0872286	0.229478	-0.380118	0.703858	0.804927	R07B1.8
WBGene00001609	2544.89	0.0368118	0.114708	0.320918	0.748272	0.837277	glp-1
WBGene00001612	68.7538	0.350712	0.181648	1.93072	0.0535178	0.120545	glr-1
WBGene00001613	73.0765	0.356013	0.18248	1.95097	0.0510606	0.116117	glr-2
WBGene00001614	9.89068	0.755926	0.475	1.59142	0.111514	0.213661	glr-3
WBGene00001615	244.4	0.27175	0.185016	1.46879	0.141889	0.25704	glr-4
WBGene00001616	140.01	0.243332	0.12928	1.88221	0.0598081	0.131612	glr-5
WBGene00001617	228.578	0.175361	0.119414	1.46851	0.141966	0.257107	glr-6
WBGene00001618	7.37108	-0.379029	0.493816	-0.767551	0.442754	0.592407	glr-7
WBGene00001619	10.4181	0.0714315	0.473077	0.150993	0.879981	0.926687	glr-8
WBGene00001620	2657.82	0.0767489	0.0863313	0.889005	0.374	0.526888	glt-1
WBGene00001621	233.813	0.397308	0.105643	3.76085	0.000169336	0.000933151	glt-3
WBGene00001622	320.267	0.242117	0.0967314	2.50298	0.0123153	0.0361917	glt-4
WBGene00001623	554.496	0.994969	0.13019	7.64245	2.13122e-14	7.55344e-13	glt-5
WBGene00001624	132.457	0.163262	0.16129	1.01223	0.31143	0.462905	glt-6
WBGene00001625	49.153	0.706951	0.216924	3.25898	0.00111815	0.00480173	glt-7
WBGene00001626	110.561	1.19599	0.725125	1.64936	NA	NA	gly-1
WBGene00001627	528.996	0.372187	0.14449	2.57587	0.00999893	0.0304315	gly-2
WBGene00001628	2071.25	-0.146178	0.0832691	-1.75549	0.0791755	0.163332	gly-3
WBGene00001629	2030.86	0.496875	0.0775515	6.40703	1.48383e-10	2.97167e-09	gly-4
WBGene00001630	3063.3	0.0873913	0.0725753	1.20415	0.228533	0.369548	gly-5
WBGene00001631	1036.74	0.352653	0.244414	1.44285	0.149063	0.267007	gly-6
WBGene00001632	2397.44	0.166972	0.0975322	1.71197	0.0869023	0.176062	gly-7
WBGene00001633	4427.34	-0.0292205	0.331379	-0.0881786	0.929735	0.95823	gly-8
WBGene00001635	1866.35	-0.212749	0.0603587	-3.52475	0.000423878	0.0020772	gly-10
WBGene00001636	228.308	0.419462	0.335236	1.25125	0.210845	0.347436	gly-11
WBGene00001637	321.713	0.144051	0.201423	0.715165	0.474507	0.619489	gly-12
WBGene00001638	528.557	0.112182	0.0690755	1.62405	0.104365	0.203129	gly-13
WBGene00001639	64.918	-0.0109454	0.184801	-0.0592281	0.95277	0.971364	gly-14
WBGene00001640	8.37039	-0.736777	0.543757	-1.35497	0.175426	0.303197	gly-15
WBGene00001641	0	NA	NA	NA	NA	NA	gly-16
WBGene00001642	0	NA	NA	NA	NA	NA	gly-17
WBGene00001643	28.3502	0.0728986	0.324553	0.224612	0.822281	0.88941	gly-18
WBGene00001644	241.239	0.199868	0.172713	1.15723	0.247178	0.392102	gly-19
WBGene00001645	1511.7	0.189628	0.0753873	2.51539	0.0118902	0.0351785	gly-20
WBGene00001646	133.996	-0.51175	0.246269	-2.07801	0.0377083	0.0909332	gna-1
WBGene00001647	930.041	0.345243	0.191857	1.79948	0.0719423	0.151559	gna-2
WBGene00001648	3469.29	0.0360046	0.0493789	0.729148	0.465911	0.611537	goa-1
WBGene00001649	1514.26	0.0353458	0.0862161	0.409968	0.681829	0.787645	gob-1
WBGene00001650	2984.42	0.100941	0.140041	0.720794	0.471036	0.616134	gon-1
WBGene00001651	3219.22	0.370237	0.092265	4.01276	6.00139e-05	0.000373621	gon-2
WBGene00001653	1061.42	0.0399923	0.101122	0.395484	0.692486	0.796133	gon-4
WBGene00001660	732.272	-0.225646	0.0785548	-2.87247	0.00407274	0.0143099	gop-1
WBGene00001661	1026.73	-0.226442	0.0614606	-3.68435	0.000229291	0.00121608	gop-2
WBGene00001662	1815.14	-0.099117	0.072389	-1.36923	0.170928	0.296913	gop-3
WBGene00001663	60.3929	0.219354	0.221282	0.991291	0.321544	0.473692	gpa-1
WBGene00001664	27.4964	0.653885	0.304854	2.14491	0.0319602	0.0794956	gpa-2
WBGene00001665	35.8873	0.749929	0.242379	3.09404	0.00197451	0.00780257	gpa-3
WBGene00001666	10.8492	-0.380591	0.425533	-0.894385	0.371116	0.524041	gpa-4
WBGene00001667	12.5957	0.46113	0.405162	1.13814	0.255063	0.40122	gpa-5
WBGene00001668	6.99043	1.306	0.591661	2.20734	0.0272903	0.0699579	gpa-6
WBGene00001669	150.001	0.379726	0.114285	3.32262	0.000891762	0.00394254	gpa-7
WBGene00001670	3.07239	0.465463	0.840957	0.553492	0.579927	0.709967	gpa-8
WBGene00001671	20.7541	1.81514	0.394031	4.60658	4.0935e-06	3.46014e-05	gpa-9
WBGene00001672	9.16167	0.299578	0.468006	0.640115	0.522098	0.661499	gpa-10
WBGene00001673	8.07144	0.067974	0.643724	0.105595	0.915904	0.949416	gpa-11
WBGene00001674	293.803	0.119861	0.131047	0.914645	0.360378	0.513842	gpa-12
WBGene00001675	10.6092	0.518519	0.470224	1.10271	0.270155	0.417841	gpa-13
WBGene00001676	17.7174	0.682259	0.319199	2.13741	0.0325649	0.0807059	gpa-14
WBGene00001677	22.45	-0.211025	0.338988	-0.622514	0.533604	0.6711	gpa-15
WBGene00001678	827.32	-0.279882	0.113647	-2.46272	0.0137886	0.0398024	gpa-16
WBGene00001679	5789.06	-0.00894885	0.0864807	-0.103478	0.917584	0.950466	gpb-1
WBGene00001680	680.242	-0.0120038	0.16234	-0.0739422	0.941056	0.965144	gpb-2
WBGene00001681	48.3153	0.382443	0.227923	1.67795	0.0933575	0.186094	gpc-1
WBGene00001682	1215.59	-0.0814264	0.0905389	-0.899353	0.368465	0.521758	gpc-2
WBGene00001683	2991.73	-0.0472086	0.164513	-0.286959	0.774143	0.856266	gpd-1
WBGene00001684	9643.81	-0.1049	0.128806	-0.814404	0.415414	0.566633	gpd-2
WBGene00001685	12544.6	-0.203862	0.12077	-1.68802	0.0914077	0.18304	gpd-3
WBGene00001686	1629.21	-0.137151	0.138518	-0.990131	0.32211	0.474199	gpd-4
WBGene00001687	93.296	0.620719	0.185544	3.34541	0.000821611	0.00367328	gpn-1
WBGene00001688	366.29	-0.247117	0.0832502	-2.96837	0.00299385	0.0110649	gpr-1
WBGene00001689	830.111	-0.274771	0.0983491	-2.79383	0.00520873	0.0176444	gpr-2
WBGene00001690	881.511	0.546078	0.579339	0.942587	0.345892	0.49885	grd-1
WBGene00001691	783.304	0.331658	0.631444	0.525238	0.599418	0.72521	grd-2
WBGene00001692	404.366	0.814825	0.480921	1.6943	0.0902079	0.181169	grd-3
WBGene00001693	11.5469	0.297494	0.472973	0.628987	0.529358	0.667645	grd-4
WBGene00001694	8459.05	-0.071141	0.0863926	-0.823461	0.410246	0.561512	grd-5
WBGene00001695	4884.41	-0.121528	0.155481	-0.781625	0.434435	0.584917	grd-6
WBGene00001696	3.63828	-1.00474	0.727956	-1.38022	0.167519	0.292312	grd-7
WBGene00001697	0.353161	2.32532	3.16086	0.73566	0.461938	NA	grd-8
WBGene00001698	5.52941	0.474741	0.571131	0.831229	0.405844	0.557696	grd-9
WBGene00001699	173.906	0.765141	0.420922	1.81778	0.0690985	0.146562	grd-10
WBGene00001700	126.216	-0.761046	0.445939	-1.70662	0.0878933	0.177606	grd-11
WBGene00001701	81.4605	-0.0652906	0.412855	-0.158144	0.874343	0.923482	grd-12
WBGene00001702	77.8791	0.650518	0.433821	1.49951	0.133742	0.245668	grd-13
WBGene00001703	9816.54	-0.285116	0.114029	-2.50039	0.0124057	0.0364115	grd-14
WBGene00001704	82.4644	-0.481237	0.173886	-2.76754	0.00564811	0.0188561	grd-15
WBGene00001705	19.7427	0.13776	0.422516	0.326047	0.744389	0.835231	grd-16
WBGene00001706	1.50212	0.972563	1.10537	0.879853	0.378939	NA	grd-17
WBGene00001707	307.292	0.46315	0.31699	1.46109	0.143992	0.259666	grh-1
WBGene00001708	754.117	0.301191	0.07452	4.04174	5.30552e-05	0.00033618	grk-1
WBGene00001709	291.348	0.31274	0.115166	2.71555	0.00661654	0.0215666	grk-2
WBGene00001710	61.846	-0.150104	0.193542	-0.775562	0.438008	0.587919	grl-1
WBGene00001711	26.6591	0.446142	0.431816	1.03318	0.301522	0.452309	grl-2
WBGene00001712	7.06867	0.571749	0.520518	1.09842	0.27202	0.420041	grl-3
WBGene00001713	3362.03	-0.63288	0.273486	-2.31413	0.0206608	0.0557318	grl-4
WBGene00001714	2364.27	0.267156	0.645203	0.414066	0.678826	0.785544	grl-5
WBGene00001715	13.8787	-0.239495	0.432063	-0.554306	0.57937	0.70946	grl-6
WBGene00001716	2878.4	0.338916	0.716483	0.473027	0.636194	0.754098	grl-7
WBGene00001717	39.0125	0.291262	0.28141	1.03501	0.300665	0.451261	grl-8
WBGene00001718	4.96181	0.0243859	0.732476	0.0332924	0.973441	0.984387	grl-9
WBGene00001719	274.654	0.344319	0.595805	0.577906	0.563328	0.69583	grl-10
WBGene00001720	0.774704	-1.1849	1.92927	-0.614172	0.539102	NA	grl-11
WBGene00001721	16.3194	0.157015	0.486661	0.322638	0.746969	0.836643	grl-12
WBGene00001722	8.75151	0.349657	0.558842	0.62568	0.531525	0.669645	grl-13
WBGene00001723	66.3423	0.33297	0.438317	0.759656	0.447461	0.596114	grl-14
WBGene00001724	993.364	0.329938	0.72058	0.457878	0.64704	0.76246	grl-15
WBGene00001725	26243.6	-0.120318	0.202149	-0.595196	0.551713	0.685199	grl-16
WBGene00001726	4.19676	0.613849	0.672201	0.913192	0.361141	0.514478	grl-17
WBGene00001727	30.3054	0.0953745	0.506492	0.188304	0.850638	0.908159	grl-18
WBGene00001728	0.443994	-0.519193	2.614	-0.19862	0.84256	NA	grl-19
WBGene00001729	1.02723	2.51826	1.52111	1.65554	0.0978142	NA	grl-20
WBGene00001730	1487.5	-0.495275	0.429182	-1.154	0.2485	0.393579	grl-21
WBGene00001731	114.265	-0.297568	0.211698	-1.40562	0.159837	0.282321	grl-22
WBGene00001732	2.13035	1.07319	1.40878	0.761783	0.446189	NA	grl-23
WBGene00001733	1.51662	1.38377	1.21059	1.14305	0.253017	NA	grl-24
WBGene00001734	4.43331	-0.0188139	0.754657	-0.0249304	0.98011	0.988303	grl-25
WBGene00001735	3.71123	0.0823685	0.829295	0.0993235	0.920881	0.952467	grl-26
WBGene00001736	483.222	-0.496725	0.239164	-2.07692	0.0378085	0.0911106	grl-27
WBGene00001737	8.24475	-0.253284	0.683323	-0.370665	0.710887	0.81112	grl-28
WBGene00001738	0.240599	0.309062	3.61842	0.0854136	0.931933	NA	grl-29
WBGene00001739	13.3031	0.38705	0.53921	0.717809	0.472875	0.617968	grl-30
WBGene00001740	372.653	0.131993	0.090913	1.45186	0.146542	0.263268	gro-1
WBGene00001743	856.041	0.12748	0.0876034	1.4552	0.145615	0.261863	grp-1
WBGene00001744	4205.35	-0.524184	0.0837581	-6.2583	3.89198e-10	7.21114e-09	gars-1
WBGene00001745	785.623	-0.150849	0.114081	-1.3223	0.186068	0.316498	gsa-1
WBGene00001746	2474.1	-0.114756	0.0675658	-1.69843	0.0894258	0.180042	gsk-3
WBGene00001747	5275.21	-0.178428	0.061787	-2.88779	0.00387957	0.0137442	gsp-1
WBGene00001748	6816.36	-0.0112321	0.0598694	-0.18761	0.851182	0.908626	gsp-2
WBGene00001749	5675.61	-0.83783	0.156544	-5.35204	8.69691e-08	1.05443e-06	gst-1
WBGene00001750	14.4377	0.222619	0.530579	0.419578	0.674794	0.783059	gst-2
WBGene00001751	36.1722	0.424308	0.243686	1.74121	0.0816471	0.167541	gst-3
WBGene00001752	1130	-0.29827	0.115023	-2.59313	0.00951063	0.0292423	gst-4
WBGene00001753	702.937	-0.777464	0.184765	-4.20786	2.57804e-05	0.0001791	gst-5
WBGene00001754	1383.32	-0.220065	0.0910738	-2.41634	0.0156774	0.0443038	gst-6
WBGene00001755	2345.34	-0.340049	0.114764	-2.96301	0.00304642	0.0112329	gst-7
WBGene00001756	3.63552	-1.24519	0.773893	-1.60899	0.107617	0.208038	gst-8
WBGene00001757	68.6314	-1.98385	0.395426	-5.01701	5.2483e-07	5.4206e-06	gst-9
WBGene00001758	5744.75	0.413459	0.129938	3.18197	0.00146275	0.00605772	gst-10
WBGene00001759	37.6183	0.494304	0.230923	2.14056	0.0323097	0.0802016	gst-11
WBGene00001760	21.9978	0.100836	0.314726	0.320392	0.748671	0.837506	gst-12
WBGene00001761	2498.82	0.0933036	0.152853	0.610413	0.541588	0.6776	gst-13
WBGene00001762	2.16365	0.252968	1.03614	0.244144	0.80712	NA	gst-14
WBGene00001763	31.7812	0.0919	0.252344	0.364186	0.715719	0.814728	gst-15
WBGene00001764	47.2627	0.0150572	0.198483	0.0758614	0.939529	0.964021	gst-16
WBGene00001765	6.87663	-4.07391	0.842376	-4.83621	1.32339e-06	1.25947e-05	gst-17
WBGene00001766	6.85218	-3.15224	0.634958	-4.96448	6.88864e-07	6.9427e-06	gst-18
WBGene00001767	7.61099	-0.241822	0.539106	-0.448562	0.653748	0.767717	gst-19
WBGene00001768	304.462	-0.522713	0.132521	-3.94439	8.00037e-05	0.000481064	gst-20
WBGene00001769	27.83	-0.146879	0.254978	-0.576045	0.564585	0.697181	gst-21
WBGene00001770	637.554	1.84999	0.179423	10.3108	6.30039e-25	6.812e-23	gst-22
WBGene00001771	38.5782	0.267845	0.305422	0.876965	0.380506	0.533166	gst-23
WBGene00001772	146.651	2.42419	0.349327	6.93959	3.93249e-12	1.00117e-10	gst-24
WBGene00001773	6.57423	-1.02297	0.658747	-1.55291	0.120445	0.22638	gst-25
WBGene00001774	1349.25	-0.161625	0.10256	-1.5759	0.115049	0.21864	gst-26
WBGene00001775	1427.17	0.259097	0.102223	2.53463	0.0112567	0.03359	gst-27
WBGene00001776	748.266	-0.139658	0.14856	-0.940084	0.347175	0.500319	gst-28
WBGene00001777	113.521	0.24653	0.183185	1.3458	0.178367	0.306914	gst-29
WBGene00001778	12.5629	-0.404104	0.470398	-0.859067	0.390304	0.542484	gst-30
WBGene00001779	5.83749	-0.144154	0.620801	-0.232206	0.816378	0.885576	gst-31
WBGene00001780	5.73448	0.649167	0.610108	1.06402	0.28732	0.436952	gst-32
WBGene00001781	37.2542	0.307756	0.23428	1.31362	0.188973	0.31988	gst-33
WBGene00001782	7.20263	0.878847	0.712477	1.23351	0.217385	0.355674	gst-34
WBGene00001783	64.1064	-0.0808269	0.260853	-0.309856	0.756671	0.843093	gst-35
WBGene00001784	1856.1	0.22506	0.0658741	3.41652	0.000634262	0.00294272	gst-36
WBGene00001785	0.60689	1.30505	1.71229	0.76217	0.445959	NA	gst-37
WBGene00001786	154.654	0.416847	0.128532	3.24315	0.00118217	0.00503869	gst-38
WBGene00001787	410.772	-0.214927	0.123993	-1.73338	0.0830283	0.169763	gst-39
WBGene00001788	56.8724	0.642492	0.180026	3.56888	0.000358505	0.00179284	gst-40
WBGene00001789	20.806	1.48993	0.48491	3.0726	0.00212204	0.00826513	gst-41
WBGene00001790	819.244	0.0351548	0.14635	0.240211	0.810167	0.881141	gst-42
WBGene00001791	165.522	-0.0469539	0.151251	-0.310436	0.756229	0.84276	gst-43
WBGene00001792	9.32727	0.35849	0.479571	0.747522	0.454748	0.602215	gst-44
WBGene00001793	3912.73	-0.133844	0.0460148	-2.90873	0.00362904	0.0129805	gsy-1
WBGene00001794	9894.91	0.200982	0.0669274	3.00299	0.00267341	0.0100528	gta-1
WBGene00001795	1940.54	0.201672	0.198547	1.01574	0.309752	0.461414	gtl-1
WBGene00001796	194.64	0.882153	0.149226	5.91152	3.38969e-09	5.43719e-08	gtl-2
WBGene00001803	69.3514	0.459489	0.169411	2.71228	0.00668224	0.0217364	lite-1
WBGene00001804	4.08448	0.448747	0.843092	0.532264	0.594543	0.721143	gur-3
WBGene00001805	32.1851	0.256689	0.28458	0.901992	0.367061	0.52046	gur-4
WBGene00001806	14.1633	-0.209941	0.350941	-0.598224	0.54969	0.683446	gur-5
WBGene00001808	494.952	-0.34529	0.0733096	-4.71003	2.47678e-06	2.20369e-05	gut-2
WBGene00001811	120.539	0.403837	0.167938	2.40467	0.0161871	0.0454733	haf-1
WBGene00001812	1549.24	0.0054195	0.0630908	0.0859	0.931546	0.959004	haf-2
WBGene00001813	1406.22	-0.272279	0.0627014	-4.34247	1.4089e-05	0.000104553	haf-3
WBGene00001814	2888.24	0.310142	0.0926113	3.34886	0.000811462	0.00363933	haf-4
WBGene00001815	1336.69	-0.050513	0.0739622	-0.682956	0.494634	0.636969	hmt-1
WBGene00001816	855.016	-0.4178	0.15038	-2.7783	0.00546448	0.0183542	haf-6
WBGene00001817	582.881	-0.638378	0.159915	-3.99199	6.55217e-05	0.000403208	haf-7
WBGene00001818	0.207626	1.06515	3.72892	0.285645	0.77515	NA	haf-8
WBGene00001819	3745.3	0.0293037	0.135443	0.216355	0.828711	0.893516	haf-9
WBGene00001820	37.0155	1.05587	0.267476	3.94752	7.8966e-05	0.000475494	ham-1
WBGene00001821	79.6748	0.284813	0.220381	1.29236	0.196232	0.329619	ham-2
WBGene00001823	369.668	-0.302327	0.081668	-3.7019	0.000213988	0.00114486	hap-1
WBGene00001824	216.146	0.827852	0.181552	4.55987	5.11853e-06	4.22415e-05	hbl-1
WBGene00001827	2841.82	0.00235217	0.0713791	0.0329533	0.973712	0.984489	hcf-1
WBGene00001828	0.090031	-1.13359	3.81693	-0.296991	0.766474	NA	hch-1
WBGene00001829	3679.42	-0.0777819	0.123666	-0.628966	0.529371	0.667645	hcp-1
WBGene00001830	3852.71	-0.0821479	0.0560363	-1.46598	0.142655	0.257919	hcp-2
WBGene00001831	924.562	0.0606225	0.114177	0.530953	0.595452	0.721784	hcp-3
WBGene00001832	2271.24	-0.0656554	0.0936479	-0.701088	0.483248	0.627448	hcp-4
WBGene00001833	1515.7	-0.221417	0.0640805	-3.45529	0.000549698	0.00259837	hcp-6
WBGene00001834	2389.68	0.241069	0.0782587	3.08041	0.00206716	0.00811239	hda-1
WBGene00001835	459.351	-0.00850708	0.103334	-0.0823261	0.934387	0.961014	hda-2
WBGene00001836	823.723	0.0547934	0.101809	0.538196	0.590442	0.717697	hda-3
WBGene00001837	995.203	0.113709	0.0603621	1.88378	0.0595945	0.131311	hda-4
WBGene00001838	437.347	0.0963306	0.0955132	1.00856	0.313187	0.464586	hda-10
WBGene00001839	367.267	-0.299284	0.110209	-2.71559	0.00661579	0.0215666	hdl-1
WBGene00001840	10716.4	-0.332851	0.0478263	-6.95958	3.41281e-12	8.76072e-11	hel-1
WBGene00001841	13.5396	0.351369	0.357641	0.982463	0.325872	0.477433	hen-1
WBGene00001842	1.05404	0.0600423	1.29211	0.0464684	0.962937	NA	her-1
WBGene00001843	2679.22	0.247354	0.0852578	2.90125	0.00371679	0.0132389	hgo-1
WBGene00001844	526.397	0.0810526	0.100725	0.80469	0.420999	0.572221	hid-1
WBGene00001851	4900.05	0.211117	0.0726483	2.90602	0.0036606	0.0130579	hif-1
WBGene00001852	54.9108	0.894562	0.309679	2.88867	0.00386872	0.0137115	hil-1
WBGene00001853	1062.06	0.742404	0.149842	4.95458	7.24878e-07	7.28846e-06	hil-2
WBGene00001854	254.715	1.22123	0.434395	2.81132	0.00493383	0.0168333	hil-3
WBGene00001855	2376.59	-0.156499	0.0925229	-1.69146	0.0907481	0.182017	hil-4
WBGene00001856	2964.73	-0.378224	0.0754458	-5.01318	5.35367e-07	5.51609e-06	hil-5
WBGene00001857	2.49628	1.95748	1.05695	1.85201	0.0640241	0.13847	hil-6
WBGene00001858	23.5697	0.437757	0.37977	1.15269	0.249037	0.394245	hil-7
WBGene00001859	28.3821	-0.119666	0.263577	-0.454007	0.649823	0.764735	hil-8
WBGene00001860	3658.89	-0.292504	0.0537139	-5.4456	5.1631e-08	6.47111e-07	him-1
WBGene00001862	1619.71	-0.30299	0.0709714	-4.26918	1.96194e-05	0.000140703	him-3
WBGene00001863	6520.25	0.121072	0.0846929	1.42954	0.152849	0.272134	him-4
WBGene00001864	250.792	0.181841	0.208428	0.872438	0.38297	0.535462	him-5
WBGene00001865	902.223	-0.231952	0.0821221	-2.82448	0.00473574	0.0162811	him-6
WBGene00001867	501.505	-0.441283	0.168423	-2.62008	0.00879088	0.0273642	him-8
WBGene00001869	943.823	0.00410951	0.110029	0.0373493	0.970207	0.982748	him-10
WBGene00001872	533.857	-0.210524	0.0987363	-2.13218	0.0329919	0.0815204	him-14
WBGene00001874	1926.37	-0.01141	0.0736598	-0.154901	0.876899	0.924851	him-17
WBGene00001875	16.8392	1.92129	0.445633	4.31137	1.62247e-05	0.000118752	his-1
WBGene00001876	18.1175	1.44661	0.647847	2.23296	0.0255517	0.0664175	his-2
WBGene00001877	267.385	1.4782	0.540197	2.73641	0.00621136	0.0204112	his-3
WBGene00001878	52.7089	1.31736	0.386365	3.40962	0.000650527	0.00301082	his-4
WBGene00001879	75.7044	1.21257	0.488672	2.48136	0.0130883	0.038077	his-5
WBGene00001880	48.5557	0.410321	0.355478	1.15428	0.248386	0.39347	his-6
WBGene00001881	95.6221	1.40345	0.468091	2.99824	0.00271546	0.0101885	his-7
WBGene00001882	60.9074	1.74656	0.487249	3.58453	0.000337689	0.00170774	his-8
WBGene00001883	183.003	1.53471	0.34354	4.46735	7.91955e-06	6.22881e-05	his-9
WBGene00001884	180.268	2.26797	0.238641	9.50369	2.02572e-21	1.62467e-19	his-10
WBGene00001885	293.295	1.68189	0.179572	9.36615	7.52259e-21	5.71149e-19	his-11
WBGene00001886	112.314	1.35701	0.179412	7.56369	3.91806e-14	1.34868e-12	his-12
WBGene00001889	3.83126	5.76427	3.68344	1.56491	NA	NA	his-15
WBGene00001890	13.0478	6.91925	2.0932	3.30558	0.000947807	0.00416767	his-16
WBGene00001891	155.908	1.81807	0.464443	3.91452	9.05841e-05	0.000536749	his-17
WBGene00001892	77.949	2.17316	0.463132	4.69231	2.70133e-06	2.37992e-05	his-18
WBGene00001893	518.693	1.89094	0.49788	3.79799	0.000145873	0.000815963	his-19
WBGene00001894	155.221	1.8069	0.449126	4.02315	5.74257e-05	0.000359737	his-20
WBGene00001898	358.91	0.782727	0.313269	2.49858	0.0124691	0.0365432	his-24
WBGene00001899	123.84	1.61993	0.232862	6.95662	3.48523e-12	8.92626e-11	his-25
WBGene00001901	0	NA	NA	NA	NA	NA	his-27
WBGene00001902	46.2196	2.51521	0.549296	4.57897	4.67272e-06	3.89957e-05	his-28
WBGene00001903	1.37177	-0.102197	1.46825	-0.0696048	0.944508	NA	his-29
WBGene00001904	0.513659	-1.55307	2.55764	-0.607227	0.5437	NA	his-30
WBGene00001905	1.92266	1.95074	1.17042	1.66671	0.0955727	NA	his-31
WBGene00001906	14.024	2.13732	0.497812	4.29342	1.75939e-05	0.000127788	his-32
WBGene00001909	1397.66	-0.0657839	0.0870603	-0.755613	0.449881	0.597869	his-35
WBGene00001910	95.9689	0.660223	0.159863	4.12992	3.62884e-05	0.000242154	C50F4.6
WBGene00001911	1918.38	0.460218	0.0967542	4.75657	1.96906e-06	1.7988e-05	his-37
WBGene00001912	85.1894	0.538165	0.208823	2.57713	0.00996245	0.0303367	his-38
WBGene00001913	0	NA	NA	NA	NA	NA	his-39
WBGene00001914	59.1266	-0.00446357	0.219253	-0.0203581	0.983758	0.990127	his-40
WBGene00001915	1407.85	-0.178186	0.125469	-1.42016	0.15556	0.276094	his-41
WBGene00001916	0	NA	NA	NA	NA	NA	his-42
WBGene00001919	42.0274	1.21208	0.504265	2.40366	0.0162319	0.0455544	his-45
WBGene00001920	64.1817	1.74201	0.539563	3.22856	NA	NA	his-46
WBGene00001921	4.79892	0.086801	1.62068	0.0535584	0.957287	0.974402	his-47
WBGene00001922	156.934	1.03181	0.180968	5.7016	1.18688e-08	1.69527e-07	his-48
WBGene00001928	1.1665	3.26706	2.93062	1.1148	0.264937	NA	his-54
WBGene00001929	84.6398	1.09028	0.444838	2.45096	0.0142475	0.0409129	his-55
WBGene00001931	175.406	0.0912531	0.144252	0.632595	0.526998	0.666029	his-57
WBGene00001932	86.3115	1.79163	1.79682	0.997114	0.318709	0.470734	his-58
WBGene00001933	163.651	1.43894	0.262942	5.47247	4.43799e-08	5.61171e-07	his-59
WBGene00001934	193.172	1.45685	0.248655	5.85893	4.65866e-09	7.2613e-08	his-60
WBGene00001935	107.339	0.928596	0.188367	4.92973	8.23441e-07	8.15469e-06	his-61
WBGene00001936	74.4601	0.832633	0.293083	2.84094	0.00449804	0.0155767	his-62
WBGene00001937	14.9828	0.901507	0.707907	1.27348	0.202847	0.337413	his-63
WBGene00001938	52.8145	1.37924	0.374329	3.68456	0.000229098	0.00121543	his-64
WBGene00001939	54.0771	1.75347	0.618644	2.83438	0.00459152	0.0158651	his-65
WBGene00001940	118.421	0.916879	0.367503	2.49489	0.0125996	0.0368749	his-66
WBGene00001941	24.4665	0.535167	0.312544	1.7123	0.0868422	0.175982	his-67
WBGene00001942	170.402	-0.0738636	0.144935	-0.509633	0.610309	0.733599	his-68
WBGene00001943	2.14466	-1.31347	0.964261	-1.36215	0.17315	NA	his-69
WBGene00001944	273.236	-1.28888	0.217709	-5.92019	3.21572e-09	5.18736e-08	his-70
WBGene00001945	1435.24	0.247873	0.119652	2.07162	0.0383011	0.0920413	his-71
WBGene00001946	2375.16	0.0540933	0.107856	0.501532	0.615996	0.738565	his-72
WBGene00001947	14.0987	0.147502	0.398436	0.370201	0.711233	0.811351	his-73
WBGene00001948	96.016	-0.01682	0.170549	-0.0986222	0.921438	0.952847	hlh-1
WBGene00001949	88.3532	0.521908	0.220683	2.36497	0.0180317	0.049651	hlh-2
WBGene00001950	6.10919	1.60101	0.65908	2.42916	0.0151339	0.042967	hlh-3
WBGene00001951	16.3231	-0.180053	0.382184	-0.471117	0.637557	0.754931	hlh-4
WBGene00001952	9.26327	0.285222	0.5369	0.531238	0.595254	0.721647	hlh-6
WBGene00001953	23.495	0.677221	0.341252	1.98452	0.0471982	0.109071	hlh-8
WBGene00001954	7.70491	0.533006	0.55226	0.965136	0.334477	0.486825	hlh-10
WBGene00001955	2246.52	0.624217	0.103357	6.03942	1.54669e-09	2.61604e-08	hlh-11
WBGene00001956	4.51864	0.34365	0.680063	0.505321	0.613334	0.736147	hlh-12
WBGene00001957	1.65386	1.04117	1.15488	0.901541	0.367301	NA	hlh-13
WBGene00001958	1.24	0.82408	1.17899	0.698972	0.48457	NA	hlh-14
WBGene00001959	0.898045	-1.3536	1.514	-0.89406	0.37129	NA	hlh-15
WBGene00001960	4.53616	0.382868	0.704711	0.543298	0.586925	0.715138	hlh-16
WBGene00001961	3.78857	-1.25555	0.797595	-1.57417	0.115449	0.219159	hlh-17
WBGene00001962	5.10013	-0.0258043	0.670018	-0.0385128	0.969279	0.982051	hlh-19
WBGene00001963	24.0131	-0.677586	0.278242	-2.43524	0.0148819	0.0424067	btb-1
WBGene00001964	0	NA	NA	NA	NA	NA	hlh-25
WBGene00001965	0	NA	NA	NA	NA	NA	hlh-26
WBGene00001966	0	NA	NA	NA	NA	NA	hlh-27
WBGene00001967	0	NA	NA	NA	NA	NA	hlh-28
WBGene00001968	0.525085	0.270832	2.20729	0.122699	0.902345	NA	hlh-29
WBGene00001971	5394.94	0.141375	0.0772677	1.82967	0.0672987	0.143582	hmg-1.1
WBGene00001972	1957.51	-0.0166146	0.0586842	-0.283119	0.777086	0.858172	hmg-1.2
WBGene00001973	2468.97	-0.134434	0.0682137	-1.97078	0.0487489	0.111737	hmg-3
WBGene00001974	1575.01	0.0980432	0.0709685	1.3815	0.167125	0.291891	hmg-4
WBGene00001975	863.138	-0.1731	0.118438	-1.46153	0.14387	0.259527	hmg-5
WBGene00001976	321.108	0.200641	0.214232	0.93656	0.348985	0.502081	hmg-11
WBGene00001977	3081.25	-0.0517941	0.0777875	-0.665841	0.505513	0.646432	hmg-12
WBGene00001978	1744.8	0.249958	0.0692411	3.60997	0.000306235	0.00157336	hmp-1
WBGene00001979	1413.76	0.231261	0.0696475	3.32045	0.000898729	0.00396718	hmp-2
WBGene00001980	3639.49	0.179668	0.139886	1.28439	0.199006	0.332774	hmr-1
WBGene00001981	1.63429	3.31973	1.33665	2.48363	0.0130051	NA	hnd-1
WBGene00001983	2462.18	-0.335116	0.0910603	-3.68016	0.000233091	0.00123278	hoe-1
WBGene00001984	322.379	-0.130135	0.293275	-0.443729	0.657239	0.770314	hog-1
WBGene00001985	334.262	0.0487921	0.142279	0.342932	0.73165	0.826375	hop-1
WBGene00001986	196.152	0.229029	0.121274	1.88852	0.0589561	0.130257	hot-1
WBGene00001987	35.4479	0.420032	0.326568	1.2862	0.198373	0.332147	hot-2
WBGene00001988	13.7083	0.185266	0.362373	0.511259	0.60917	0.732539	hot-3
WBGene00001989	50.6866	0.664439	0.206362	3.21977	0.00128293	0.00541145	hot-4
WBGene00001990	86.091	0.0472363	0.187237	0.252281	0.800824	0.874805	hot-5
WBGene00001991	127.732	0.190256	0.134614	1.41335	0.157553	0.279025	hot-6
WBGene00001992	14.6559	0.711154	0.380376	1.86961	0.0615381	0.134343	hot-7
WBGene00001993	4996.1	-0.122011	0.102487	-1.1905	0.233849	0.375714	hpd-1
WBGene00001994	1898.91	0.015956	0.067783	0.235399	0.813899	0.88385	hpk-1
WBGene00001995	95.725	0.24946	0.153014	1.63031	0.103037	0.201117	hpl-1
WBGene00001996	1117.5	-0.0395407	0.0888389	-0.445083	0.65626	0.769656	hpl-2
WBGene00001997	401.222	-0.144316	0.100771	-1.43212	0.15211	0.271271	hpr-9
WBGene00001998	499.572	0.0632846	0.103302	0.612618	0.540129	0.676567	hpr-17
WBGene00001999	7187.27	-0.212145	0.0599081	-3.54118	0.000398337	0.00197012	hrp-1
WBGene00002000	7414.61	-0.0461231	0.0693628	-0.664955	0.506079	0.646865	hrp-2
WBGene00002001	2251.22	-0.314018	0.0437716	-7.174	7.2838e-13	2.06693e-11	hars-1
WBGene00002002	1044.91	-0.145292	0.065139	-2.23049	0.0257151	0.0667312	hsb-1
WBGene00002003	779.514	0.176247	0.0712451	2.47381	0.0133681	0.0387587	hse-5
WBGene00002004	1139.29	-0.100954	0.0762589	-1.32383	0.18556	0.315918	hsf-1
WBGene00002005	63274	-0.726829	0.0903374	-8.04572	8.57379e-16	3.58108e-14	hsp-1
WBGene00002006	7.20694	-0.378251	0.530986	-0.712355	0.476245	0.621272	hsp-2
WBGene00002007	30556.8	-0.286654	0.106319	-2.69617	0.00701412	0.0226127	hsp-3
WBGene00002008	16875.2	-0.599912	0.265141	-2.26262	0.0236592	0.0622759	hsp-4
WBGene00002010	16843	-0.99324	0.0687288	-14.4516	2.44957e-47	1.34987e-44	hsp-6
WBGene00002011	1541.48	-0.225525	0.0803954	-2.8052	0.00502861	0.0171204	hsp-12.2
WBGene00002012	11.3805	-0.950381	0.413801	-2.29671	0.0216352	0.0577941	hsp-12.3
WBGene00002013	2.47671	0.0481933	0.988725	0.0487429	0.961124	0.977024	hsp-12.6
WBGene00002015	768.447	-1.26521	0.799869	-1.58177	0.113702	0.216758	hsp-16.1
WBGene00002016	330.236	-0.259756	0.807647	-0.321621	0.74774	0.836957	hsp-16.2
WBGene00002017	12.6616	-0.91824	0.712132	-1.28942	0.197251	0.330908	hsp-16.11
WBGene00002018	379.648	-0.929587	0.821655	-1.13136	0.257904	0.404051	hsp-16.41
WBGene00002019	1083.37	-1.57598	0.72144	-2.18449	0.0289264	0.07324	hsp-16.48
WBGene00002021	1648.07	0.166737	0.290824	0.573327	0.566423	0.69884	hsp-17
WBGene00002023	3160.32	-0.0361271	0.104602	-0.345377	0.729811	0.825271	hsp-25
WBGene00002024	1462.48	0.186425	0.227174	0.820624	0.41186	0.562955	hsp-43
WBGene00002025	9640.1	-1.53828	0.0620102	-24.8069	7.55214e-136	4.30044e-132	hsp-60
WBGene00002026	114.56	-0.847498	0.736046	-1.15142	0.249559	0.394962	hsp-70
WBGene00002027	6107.84	0.0402931	0.0898674	0.448362	0.653892	0.767833	hsr-9
WBGene00002028	660.871	0.0944369	0.0844716	1.11797	0.263579	0.410441	hst-1
WBGene00002029	100.6	0.189141	0.150708	1.25502	0.209473	0.345809	hst-2
WBGene00002030	39.8615	0.727464	0.214681	3.38857	0.000702569	0.00321683	hst-3.1
WBGene00002031	94.2709	0.337664	0.147381	2.29109	0.021958	0.0585011	hst-6
WBGene00002032	1530.89	-0.232973	0.075764	-3.07498	0.00210515	0.00821243	htp-1
WBGene00002033	935.616	-0.348142	0.0880365	-3.95452	7.66871e-05	0.000463897	htp-2
WBGene00002034	1607.31	-0.317045	0.0701633	-4.51867	6.22303e-06	5.04547e-05	htp-3
WBGene00002035	2238.28	0.452894	0.0979565	4.62342	3.77462e-06	3.2257e-05	hum-1
WBGene00002036	4811.02	0.10822	0.0775064	1.39628	0.162631	0.286091	hum-2
WBGene00002037	2280.38	-0.167318	0.103421	-1.61783	0.105699	0.205096	hum-4
WBGene00002038	4252.27	0.492053	0.0500927	9.82285	8.97669e-23	8.24456e-21	hum-5
WBGene00002039	1186.08	0.136858	0.210441	0.650338	0.515474	0.655538	hum-6
WBGene00002040	965.599	0.0374204	0.0556703	0.672179	0.501469	0.642994	hum-7
WBGene00002041	2481.32	0.40398	0.0829725	4.86884	1.12253e-06	1.08379e-05	hum-8
WBGene00002042	239.37	-0.0357592	0.108419	-0.329823	0.741534	0.83378	hus-1
WBGene00002043	2026.95	0.57923	0.0717896	8.06844	7.12033e-16	2.98129e-14	hyl-1
WBGene00002044	1371.8	0.131401	0.0752227	1.74682	0.0806683	0.165891	hyl-2
WBGene00002045	26760.4	-0.434677	0.0453353	-9.58806	8.97577e-22	7.47966e-20	icd-1
WBGene00002046	1090.89	-0.48739	0.0809757	-6.01897	1.75528e-09	2.93975e-08	icln-1
WBGene00002047	1069.25	-0.0980622	0.0879394	-1.11511	0.264803	0.411838	icp-1
WBGene00002048	1980.48	0.489851	0.0730684	6.70401	2.02781e-11	4.58821e-10	ida-1
WBGene00002050	3846.59	0.0243339	0.105533	0.230581	0.81764	0.886311	ifa-1
WBGene00002051	12.75	0.773511	0.405511	1.90749	0.0564565	0.125797	ifa-3
WBGene00002052	3815.47	-0.0394279	0.141209	-0.279216	0.780079	0.860206	ifa-4
WBGene00002053	9955	0.0299978	0.0588101	0.51008	0.609995	0.733325	ifb-1
WBGene00002054	14885.2	0.387503	0.123795	3.13019	0.00174691	0.00704331	ifb-2
WBGene00002055	935.613	0.262628	0.182413	1.43975	0.149939	0.268351	ifc-1
WBGene00002056	14808.3	0.479228	0.144292	3.32124	0.000896193	0.00395803	ifc-2
WBGene00002057	2105.56	0.318631	0.0756044	4.21445	2.5039e-05	0.000174874	ifd-1
WBGene00002058	1500.28	0.624227	0.101253	6.16505	7.04617e-10	1.25385e-08	ifd-2
WBGene00002059	5411.56	-0.464215	0.0676773	-6.85924	6.92258e-12	1.687e-10	ife-1
WBGene00002060	1164.44	-0.022999	0.121843	-0.188759	0.850282	0.907892	ife-2
WBGene00002061	4819.39	-0.109161	0.078335	-1.39351	0.163466	0.287263	ife-3
WBGene00002062	211.809	0.0611864	0.124621	0.490981	0.62344	0.744458	ife-4
WBGene00002063	190.467	-0.493978	0.130239	-3.79286	0.000148923	0.00083112	ife-5
WBGene00002064	15188.3	-0.664082	0.069705	-9.52702	1.61856e-21	1.31666e-19	iff-1
WBGene00002065	8547.18	-0.158302	0.122299	-1.29439	0.195531	0.328802	iff-2
WBGene00002066	12837.4	-0.465128	0.056184	-8.27866	1.24567e-16	5.6445e-15	ifg-1
WBGene00002067	2132.7	-0.045813	0.0975799	-0.469492	0.638718	0.755841	ifp-1
WBGene00002068	2058.97	-0.070103	0.116549	-0.601491	0.547513	0.681734	ify-1
WBGene00002069	253.492	0.602487	0.151047	3.98873	6.64267e-05	0.000408043	ikb-1
WBGene00002070	5625.15	-0.122185	0.0772152	-1.58239	0.11356	0.216584	ile-1
WBGene00002071	1476.04	-0.161634	0.113065	-1.42957	0.15284	0.272134	ile-2
WBGene00002072	1250.51	0.0583413	0.134077	0.435133	0.663466	0.774363	ima-1
WBGene00002073	4755.25	-0.0780913	0.130885	-0.596641	0.550747	0.684298	ima-2
WBGene00002074	6812.1	-0.197977	0.0642022	-3.08365	0.00204477	0.0080467	ima-3
WBGene00002075	2355.43	-0.446642	0.0656573	-6.80262	1.02733e-11	2.43072e-10	imb-1
WBGene00002076	2863.4	-0.284088	0.0962259	-2.9523	0.00315415	0.0115677	imb-2
WBGene00002077	14475.3	-0.495348	0.0876838	-5.64925	1.61148e-08	2.23813e-07	imb-3
WBGene00002078	6831.83	-0.233579	0.0528489	-4.41975	9.88172e-06	7.58353e-05	xpo-1
WBGene00002079	3234.63	-0.0498121	0.078776	-0.632327	0.527173	0.666102	xpo-2
WBGene00002080	2704.48	-0.186522	0.068046	-2.74112	0.00612311	0.0201621	xpo-3
WBGene00002081	1861.82	0.207719	0.110865	1.87361	0.0609839	0.13358	ina-1
WBGene00002083	17087.9	-0.743546	0.0609335	-12.2026	3.01116e-34	6.42995e-32	inf-1
WBGene00002084	88.7633	0.444195	0.160569	2.76638	0.00566829	0.0189198	ins-1
WBGene00002085	2.43857	0.089594	0.914651	0.0979543	0.921969	NA	ins-2
WBGene00002086	55.3181	0.0687907	0.224485	0.306438	0.759271	0.845212	ins-3
WBGene00002087	73.7721	0.265365	0.233728	1.13536	0.256226	0.402271	ins-4
WBGene00002088	91.2176	0.249638	0.18488	1.35027	0.176929	0.305023	ins-5
WBGene00002089	107.189	0.875758	0.155912	5.61699	1.94308e-08	2.65125e-07	ins-6
WBGene00002090	98.6345	1.57901	0.189844	8.31744	8.98834e-17	4.19529e-15	ins-7
WBGene00002091	0.337287	-0.412262	2.71918	-0.151613	0.879492	NA	ins-8
WBGene00002092	12.4153	0.566237	0.668801	0.846645	0.397193	0.549235	ins-9
WBGene00002093	9.77881	0.47117	0.444025	1.06113	0.28863	0.438328	ins-10
WBGene00002094	10.8132	0.625496	0.446763	1.40006	0.161495	0.284532	ins-11
WBGene00002095	22.9386	0.0806503	0.33548	0.240402	0.810018	0.881114	ins-12
WBGene00002096	0.0579952	0	3.81693	0	1	NA	ins-13
WBGene00002097	15.2133	0.639059	0.409829	1.55933	0.118918	0.224127	ins-14
WBGene00002098	0.159542	-0.412256	3.81693	-0.108007	0.91399	NA	ins-15
WBGene00002099	0.781793	1.36611	1.68115	0.812603	0.416446	NA	ins-16
WBGene00002100	232.13	0.357575	0.116252	3.07587	0.0020989	0.00820303	ins-17
WBGene00002101	77.2275	0.671334	0.180601	3.71722	0.000201427	0.0010848	ins-18
WBGene00002102	0.357952	0.860412	2.57266	0.334444	0.738044	NA	ins-19
WBGene00002103	11.6632	0.946321	0.478762	1.9766	0.0480869	0.110487	ins-20
WBGene00002104	2.41328	1.64217	1.04841	1.56635	0.117268	NA	ins-21
WBGene00002105	32.5533	0.165337	0.260639	0.634352	0.525851	0.664874	ins-22
WBGene00002106	12.5081	-0.194639	0.386166	-0.504031	0.61424	0.736975	ins-23
WBGene00002107	20.9718	0.881967	0.335789	2.62655	0.00862547	0.026913	ins-24
WBGene00002108	1.11693	0.983531	1.60501	0.612789	0.540016	NA	ins-25
WBGene00002109	92.4398	0.622041	0.151683	4.10092	4.11508e-05	0.000269961	ins-26
WBGene00002110	248.663	0.0339757	0.19834	0.1713	0.863988	0.916512	ins-27
WBGene00002111	54.1588	0.806625	0.212188	3.80146	0.000143846	0.000806737	ins-28
WBGene00002112	19.827	-0.129864	0.335454	-0.38713	0.69866	0.800967	ins-29
WBGene00002113	36.7758	0.736492	0.223073	3.30158	0.000961433	0.00421673	ins-30
WBGene00002114	0.161754	-0.412256	3.81693	-0.108007	0.91399	NA	ins-31
WBGene00002115	3.53214	1.46399	0.776173	1.88616	0.0592735	0.130823	ins-32
WBGene00002116	78.398	-0.391199	0.231517	-1.68972	0.0910816	0.182549	ins-33
WBGene00002117	7.91324	0.541281	0.57782	0.936765	0.348879	0.502022	ins-34
WBGene00002118	12.1918	0.366444	0.585556	0.625806	0.531442	0.669645	ins-35
WBGene00002119	1.71384	-0.240484	1.41261	-0.170241	0.864821	NA	ins-36
WBGene00002120	285.526	0.207529	0.101087	2.05297	0.0400751	0.0955216	ins-37
WBGene00002121	0.084265	0	3.81693	0	1	NA	ins-38
WBGene00002123	572.411	0.168439	0.125837	1.33855	0.180718	0.309815	inx-1
WBGene00002124	62.3315	1.1674	0.350104	3.33442	0.000854767	0.0038026	inx-2
WBGene00002125	190.761	0.667877	0.301613	2.21435	0.0268046	0.0689717	inx-3
WBGene00002127	1158.98	-0.104159	0.0675816	-1.54123	0.123261	0.230808	inx-5
WBGene00002128	171.402	0.133307	0.128108	1.04058	0.298069	0.448587	inx-6
WBGene00002129	277.199	0.583679	0.115439	5.05615	4.27807e-07	4.51403e-06	inx-7
WBGene00002130	904.955	-0.134263	0.170438	-0.787756	0.430839	0.581453	inx-8
WBGene00002131	496.165	0.145871	0.0971412	1.50164	0.13319	0.244917	inx-9
WBGene00002132	350.284	0.118105	0.116995	1.00949	0.31274	0.464205	inx-10
WBGene00002133	218.86	0.186557	0.136542	1.3663	0.171846	0.298156	inx-11
WBGene00002134	2285.71	-0.0120429	0.0532219	-0.226277	0.820986	0.88864	inx-12
WBGene00002135	2070.93	0.0479496	0.0563421	0.851044	0.394745	0.546558	inx-13
WBGene00002136	1213.63	0.048485	0.136971	0.353981	0.723353	0.820303	inx-14
WBGene00002137	2583.63	0.277078	0.0614414	4.50964	6.49377e-06	5.23269e-05	inx-15
WBGene00002138	2465.28	0.430051	0.065924	6.52343	6.87173e-11	1.44926e-09	inx-16
WBGene00002139	1040.73	0.105957	0.0620407	1.70787	0.0876602	0.177303	inx-17
WBGene00002140	220.382	-0.125264	0.127549	-0.982081	0.32606	0.477628	inx-18
WBGene00002141	26.0153	0.209003	0.275801	0.757802	0.44857	0.596857	inx-19
WBGene00002142	40.056	-0.000420013	0.275174	-0.00152636	0.998782	0.999309	inx-20
WBGene00002143	597.71	-0.130117	0.0765805	-1.69909	0.0893021	0.179836	inx-21
WBGene00002144	840.94	0.273333	0.192822	1.41754	0.156326	0.277111	inx-22
WBGene00002146	513.94	0.151392	0.0933251	1.6222	0.10476	0.203667	ipp-5
WBGene00002147	2261.9	-0.049442	0.0741678	-0.666624	0.505013	0.645908	ire-1
WBGene00002148	1601.06	0.0142726	0.0990151	0.144146	0.885385	0.929742	gon-14
WBGene00002149	55.8455	0.526879	0.246003	2.14176	0.0322128	0.0800075	irk-1
WBGene00002150	70.0481	0.280223	0.171903	1.63012	0.103075	0.201169	irk-2
WBGene00002151	77.4497	0.280901	0.191255	1.46872	0.141907	0.257046	irk-3
WBGene00002152	7753.91	-0.310017	0.0452007	-6.85867	6.95041e-12	1.69136e-10	iars-1
WBGene00002153	2284.34	-0.90886	0.096855	-9.38372	6.36863e-21	4.87872e-19	iars-2
WBGene00002162	12880.7	-0.322149	0.073604	-4.37678	1.20445e-05	9.06018e-05	isp-1
WBGene00002163	153.465	0.28936	0.178288	1.623	0.10459	0.203405	ist-1
WBGene00002169	2636.98	-0.0737678	0.0743986	-0.991522	0.321431	0.473607	isw-1
WBGene00002173	5128.97	-0.185649	0.0656678	-2.82709	0.00469734	0.0161784	itr-1
WBGene00002174	3117.28	0.512241	0.0819744	6.2488	4.13627e-10	7.63066e-09	itx-1
WBGene00002175	1063.66	0.378882	0.0842741	4.49583	6.93001e-06	5.56323e-05	jac-1
WBGene00002176	149.038	0.159372	0.121008	1.31704	0.187825	0.318663	jip-1
WBGene00002177	26.2541	0.88817	0.31155	2.8508	0.00436087	0.0151694	jkk-1
WBGene00002178	162.59	0.489176	0.130463	3.74955	0.000177155	0.000971226	jnk-1
WBGene00002179	2047.26	0.257041	0.07869	3.2665	0.00108887	0.00469015	jph-1
WBGene00002180	343.343	0.0880629	0.100049	0.880195	0.378754	0.531481	jtr-1
WBGene00002181	139.371	0.476442	0.183175	2.60102	0.00929471	0.0287076	kal-1
WBGene00002182	87.0353	0.392089	0.158689	2.47081	0.0134809	0.0390395	kap-1
WBGene00002183	3490.2	-0.166225	0.0631155	-2.63367	0.00844683	0.0264523	kat-1
WBGene00002184	81.6074	0.0465483	0.207198	0.224656	0.822247	0.88941	kel-1
WBGene00002185	709.989	0.211902	0.0648491	3.26761	0.00108458	0.00467641	kel-3
WBGene00002186	1364.01	-0.545844	0.0928675	-5.87767	4.16088e-09	6.55722e-08	kel-10
WBGene00002187	1415.57	-0.00171964	0.0921737	-0.0186565	0.985115	0.991	kgb-1
WBGene00002188	99.2393	0.252585	0.214537	1.17735	0.239055	0.38191	kgb-2
WBGene00002189	3510.91	0.233788	0.0495891	4.7145	2.42303e-06	2.15924e-05	kin-1
WBGene00002190	4665.58	0.10075	0.0607379	1.65877	0.0971621	0.192064	kin-2
WBGene00002191	5649.35	-0.160395	0.0518739	-3.09202	0.00198799	0.00784677	kin-3
WBGene00002192	3839.32	0.200689	0.0697011	2.87928	0.00398582	0.0140622	kin-4
WBGene00002193	549.094	-0.30526	0.0990519	-3.08182	0.00205738	0.00808146	kin-5
WBGene00002194	0.14226	0	3.81693	0	1	NA	kin-6
WBGene00002195	81.2353	0.14534	0.183139	0.793601	0.427428	0.578337	kin-9
WBGene00002196	4004.39	-0.278779	0.0498834	-5.58862	2.28885e-08	3.07152e-07	kin-10
WBGene00002198	524.345	-0.405095	0.100901	-4.01476	5.9507e-05	0.000370871	kin-14
WBGene00002199	141.078	-0.57719	0.318668	-1.81126	0.0701013	0.148321	kin-15
WBGene00002200	287.456	-0.119611	0.305189	-0.391923	0.695115	0.797974	kin-16
WBGene00002201	3189.71	0.0721437	0.0819506	0.880331	0.37868	0.531421	kin-18
WBGene00002202	8954.57	-0.136414	0.0627664	-2.17336	0.0297531	0.0749217	kin-19
WBGene00002203	1598.6	-0.15434	0.0968958	-1.59284	0.111195	0.213121	kin-20
WBGene00002204	224.288	-0.398046	0.122364	-3.25296	0.00114208	0.00489343	kin-21
WBGene00002205	2.58551	0.593255	1.14675	0.517334	0.604923	0.729106	kin-23
WBGene00002206	253.535	-0.592538	0.125489	-4.72183	2.33733e-06	2.09335e-05	kin-24
WBGene00002207	1677.09	0.238265	0.0776486	3.0685	0.00215134	0.00835636	sid-3
WBGene00002208	239.932	-0.493517	0.116677	-4.22976	2.33941e-05	0.000164733	kin-26
WBGene00002210	1161.74	0.03816	0.0597457	0.638707	0.523014	0.662463	kin-29
WBGene00002211	32.0567	0.5788	0.283343	2.04276	0.0410766	0.0974871	kin-30
WBGene00002212	226.958	-0.582835	0.153254	-3.80305	0.000142923	0.000802351	kin-31
WBGene00002213	368.931	0.297369	0.0915488	3.2482	0.00116139	0.00495999	kin-32
WBGene00002214	1671.74	-0.287054	0.103655	-2.76933	0.00561718	0.0187839	klc-1
WBGene00002215	1640.01	-0.0536164	0.0790596	-0.678177	0.497659	0.63926	klc-2
WBGene00002216	683.914	-0.117693	0.0713239	-1.65012	0.0989193	0.194857	klp-3
WBGene00002217	2729.11	0.313765	0.0746049	4.20569	2.60291e-05	0.000180388	klp-4
WBGene00002218	9.89243	-0.370815	0.509959	-0.727147	0.467136	0.612581	klp-6
WBGene00002219	2395.01	-0.0311324	0.0814758	-0.382106	0.702383	0.803832	klp-7
WBGene00002220	399.567	0.142526	0.084441	1.68787	0.0914359	0.183075	gcc-1
WBGene00002221	1088.28	-0.286634	0.146109	-1.96179	0.0497874	0.113675	klp-10
WBGene00002222	270.389	-0.240788	0.207398	-1.16099	0.245645	0.390178	klp-11
WBGene00002223	4322.97	-0.0977329	0.0703903	-1.38844	0.165002	0.289249	klp-12
WBGene00002224	41.6138	0.444588	0.231321	1.92196	0.0546113	0.122539	klp-13
WBGene00002225	2177.46	0.0737346	0.176998	0.416584	0.676983	0.784379	klp-15
WBGene00002226	2028.86	0.125951	0.15977	0.788327	0.430506	0.581232	klp-16
WBGene00002227	320.277	-0.347603	0.126754	-2.74235	0.0061002	0.0200983	klp-17
WBGene00002228	2449.43	-0.169963	0.0983797	-1.72762	0.0840563	0.171434	klp-18
WBGene00002229	3498.36	0.0666068	0.0947611	0.702892	0.482123	0.626654	klp-19
WBGene00002230	228.675	0.155681	0.120504	1.29192	0.196384	0.32981	klp-20
WBGene00002231	2135.55	-0.241481	0.0643633	-3.75184	0.00017554	0.000963919	knl-1
WBGene00002232	910.681	0.514207	0.188493	2.728	0.00637205	0.0208732	kpc-1
WBGene00002233	43.0767	0.469372	0.218654	2.14664	0.031822	0.0791981	kqt-1
WBGene00002234	686.52	0.333223	0.0744773	4.47415	7.67142e-06	6.06156e-05	kqt-2
WBGene00002235	275.204	0.570322	0.114277	4.99071	6.01585e-07	6.12813e-06	kqt-3
WBGene00002238	9475.07	-0.459605	0.0586037	-7.84259	4.41357e-15	1.68673e-13	kars-1
WBGene00002239	408.176	0.211873	0.0793091	2.67148	0.00755174	0.0240549	ksr-1
WBGene00002240	746.693	0.0749858	0.0914799	0.819697	0.412389	0.563542	ksr-2
WBGene00002241	1168.12	0.033466	0.0844677	0.396198	0.691959	0.795741	kup-1
WBGene00002242	71.5483	0.43191	0.180415	2.39398	0.0166666	0.046545	kvs-1
WBGene00002243	232.781	0.244873	0.174966	1.39955	0.161649	0.284774	lad-2
WBGene00002244	4699.75	-0.435922	0.0597613	-7.29438	3.0004e-13	9.13651e-12	laf-1
WBGene00002245	1053.33	0.0746172	0.103157	0.723336	0.469473	0.614749	lag-1
WBGene00002246	17.9257	0.252034	0.345617	0.72923	0.465861	0.611537	lag-2
WBGene00002247	7203.22	-0.0250153	0.130012	-0.192407	0.847423	0.905859	lam-1
WBGene00002248	314.982	0.775292	0.305807	2.53523	0.0112372	0.0335547	lam-3
WBGene00002249	4113.73	-0.510401	0.0687291	-7.42627	1.117e-13	3.6485e-12	lap-1
WBGene00002250	8676.01	-0.0975797	0.051576	-1.89196	0.0584965	0.129493	lap-2
WBGene00002251	3162.93	0.178291	0.0671214	2.65624	0.00790169	0.0250201	lat-1
WBGene00002252	219.405	-0.0274425	0.200826	-0.136648	0.891309	0.933895	lat-2
WBGene00002253	553.293	-0.358095	0.103436	-3.46201	0.00053616	0.00254423	lbp-1
WBGene00002254	5462.52	0.107002	0.0918172	1.16538	0.243865	0.388397	lbp-2
WBGene00002255	2197.24	-0.811465	0.134294	-6.04244	1.51798e-09	2.57003e-08	lbp-3
WBGene00002256	539.304	-0.358318	0.103958	-3.44677	0.000567334	0.00267211	lbp-4
WBGene00002257	2288.35	0.0514338	0.14289	0.359954	0.718882	0.816832	lbp-5
WBGene00002258	8761.08	-0.36292	0.101134	-3.58849	0.000332604	0.00168702	lbp-6
WBGene00002259	1889.93	0.356314	0.155314	2.29415	0.0217817	0.058131	lbp-7
WBGene00002260	3.29486	-0.363735	0.73115	-0.497483	0.618848	0.74084	lbp-8
WBGene00002261	1024.85	0.271468	0.058221	4.66271	3.12068e-06	2.71301e-05	ldb-1
WBGene00002262	1356.71	-0.244535	0.104306	-2.34439	0.0190581	0.0520329	ldh-1
WBGene00002263	6580	-0.296741	0.0696874	-4.25818	2.06098e-05	0.000147005	lea-1
WBGene00002264	17020.1	0.153945	0.0587085	2.62219	0.00873664	0.0272152	lec-1
WBGene00002265	10467.3	-0.00443045	0.19748	-0.0224349	0.982101	0.989399	lec-2
WBGene00002266	3516.42	-0.0582797	0.102278	-0.569815	0.568803	0.701123	lec-3
WBGene00002267	1642.27	0.311145	0.130764	2.37944	0.0173391	0.0481376	lec-4
WBGene00002268	5436.09	0.196797	0.0549359	3.5823	0.000340584	0.00171983	lec-5
WBGene00002269	19091.3	0.597736	0.0721695	8.28238	1.20733e-16	5.52945e-15	lec-6
WBGene00002270	32.9537	-0.0472374	0.281835	-0.167606	0.866893	0.918339	lec-7
WBGene00002271	4537.04	0.679586	0.104359	6.51198	7.41681e-11	1.56036e-09	lec-8
WBGene00002272	4942	0.677155	0.0595689	11.3676	6.064e-30	9.68143e-28	lec-9
WBGene00002273	6014.82	0.973607	0.158034	6.16075	7.24014e-10	1.28169e-08	lec-10
WBGene00002274	817.083	1.58911	0.177908	8.93222	4.17554e-19	2.6517e-17	lec-11
WBGene00002275	658.638	0.00351395	0.0845991	0.0415365	0.966868	0.980722	lem-2
WBGene00002276	1333.67	0.624565	0.120169	5.19738	2.02112e-07	2.282e-06	lem-3
WBGene00002278	559.122	-0.197168	0.0938236	-2.10148	0.0355989	0.0867775	lep-2
WBGene00002280	68564.4	-0.479756	0.168958	-2.8395	0.00451837	0.0156408	let-2
WBGene00002282	238.903	1.13726	0.757003	1.50231	0.133016	0.244651	let-4
WBGene00002295	1810.96	0.281247	0.110908	2.53586	0.0112173	0.0335127	let-19
WBGene00002297	2116.07	-0.190179	0.100559	-1.89121	0.0585963	0.129646	ect-2
WBGene00002299	654.64	0.197494	0.0733185	2.69365	0.00706742	0.0227412	let-23
WBGene00002324	280.843	-0.0284553	0.134331	-0.21183	0.83224	0.895907	let-49
WBGene00002335	2106.66	-0.0347333	0.0577085	-0.601874	0.547258	0.681549	let-60
WBGene00002344	10748	-0.173494	0.0760397	-2.28163	0.0225114	0.0597054	let-70
WBGene00002348	7453.09	-0.0585647	0.0953026	-0.614514	0.538876	0.675727	myo-1
WBGene00002363	6579.14	0.156564	0.0483527	3.23796	0.0012039	0.0051236	let-92
WBGene00002368	859.02	0.0384903	0.169061	0.227671	0.819902	0.888167	let-99
WBGene00002393	160.264	0.698368	0.453169	1.54108	0.123298	0.230828	lpr-1
WBGene00002497	1324.31	0.0586601	0.1796	0.326615	0.743959	0.835187	let-268
WBGene00002583	4445.38	0.0279039	0.0698196	0.399657	0.689409	0.79361	let-363
WBGene00002601	21.1787	0.130296	0.34336	0.379473	0.704337	0.805097	let-381
WBGene00002632	1474.39	0.201305	0.07423	2.71191	0.00668965	0.0217509	let-413
WBGene00002637	4579.08	-0.223537	0.0589816	-3.78996	0.000150674	0.000840341	let-418
WBGene00002694	3901.98	-0.103576	0.0575931	-1.79841	0.0721121	0.151767	let-502
WBGene00002696	1498.33	-0.156929	0.0872231	-1.79916	0.0719928	0.151596	let-504
WBGene00002717	5374.54	0.18498	0.0469277	3.94182	8.08665e-05	0.000485057	let-526
WBGene00002783	4624.26	-0.00202987	0.0633024	-0.0320663	0.974419	0.984971	let-607
WBGene00002804	1901.73	-0.315199	0.0515276	-6.11709	9.52992e-10	1.66292e-08	let-630
WBGene00002827	149.571	1.2294	0.713529	1.72299	0.0848901	0.172814	let-653
WBGene00002845	13296	-0.341919	0.0922278	-3.70733	0.000209455	0.00112378	let-711
WBGene00002850	6793.85	-0.657969	0.0490937	-13.4023	5.86075e-41	2.32835e-38	let-716
WBGene00002855	3795.85	0.167865	0.061732	2.71925	0.00654292	0.0213691	let-721
WBGene00002879	4144.11	-0.61745	0.0911941	-6.77072	1.28143e-11	2.99052e-10	let-754
WBGene00002881	384.215	0.417363	0.119218	3.50084	0.000463787	0.00224063	let-756
WBGene00002889	3496.99	-0.110713	0.0998964	-1.10828	0.267741	0.415198	let-765
WBGene00002891	6278.04	-0.291566	0.0881656	-3.30703	0.000942905	0.00414718	let-767
WBGene00002915	14170.6	-0.00425573	0.108751	-0.0391328	0.968784	0.981831	let-805
WBGene00002957	2265.95	-0.0264873	0.0443026	-0.597874	0.549924	0.683624	let-858
WBGene00002974	210.211	0.2161	0.115824	1.86577	0.0620739	0.135239	lev-1
WBGene00002975	60.2596	0.462026	0.210326	2.19671	0.0280412	0.0715225	lev-8
WBGene00002976	164.6	0.225313	0.132762	1.69712	0.0896749	0.180395	lev-9
WBGene00002977	927.896	0.304297	0.0664994	4.57593	4.74107e-06	3.94889e-05	lev-10
WBGene00002978	44750.5	0.356754	0.0825601	4.32114	1.55223e-05	0.000114099	lev-11
WBGene00002979	1295.92	0.289203	0.099501	2.90654	0.00365453	0.0130416	lfe-2
WBGene00002980	9832.19	0.143253	0.138981	1.03074	0.302664	0.453666	lgg-1
WBGene00002981	1989.27	0.469113	0.177347	2.64516	0.00816515	0.0257258	lgg-2
WBGene00002982	235.449	-0.0655914	0.137187	-0.478115	0.632568	0.751106	lgg-3
WBGene00002983	2319.35	-0.0767128	0.322712	-0.237713	0.812104	0.882484	lgx-1
WBGene00002985	1484.31	0.214883	0.0880827	2.43956	0.0147052	0.0420083	lig-1
WBGene00002986	736.298	0.0895482	0.0746978	1.19881	0.230603	0.371887	lig-4
WBGene00002987	16.0503	0.65733	0.410461	1.60144	0.109279	0.210345	lim-4
WBGene00002988	197.071	0.2433	0.118785	2.04824	0.0405367	0.0964161	lim-6
WBGene00002989	266.992	0.204031	0.0907902	2.24728	0.024622	0.0642752	lim-7
WBGene00002990	476.36	0.517587	0.113707	4.55195	5.31513e-06	4.3653e-05	lin-1
WBGene00002991	550.481	0.256709	0.0700577	3.66425	0.000248063	0.00130029	lin-2
WBGene00002992	561.019	0.0416438	0.194547	0.214055	0.830504	0.894828	lin-3
WBGene00002994	1971.45	-0.137129	0.0865609	-1.58419	0.11315	0.215928	lin-5
WBGene00002996	418.773	0.0983992	0.0790927	1.2441	0.213463	0.350667	lin-7
WBGene00002997	148.355	0.265234	0.13851	1.91491	0.0555041	0.124102	lin-8
WBGene00002998	1114.27	0.034112	0.0677559	0.503455	0.614644	0.737319	lin-9
WBGene00002999	2156.28	-0.0516286	0.0815492	-0.633097	0.52667	0.665664	lin-10
WBGene00003000	233.376	0.117832	0.142534	0.826696	0.408409	0.559761	lin-11
WBGene00003001	219.5	0.404438	0.141406	2.86012	0.00423487	0.0147974	lin-12
WBGene00003002	3425.71	-0.166006	0.0559565	-2.96671	0.0030101	0.0111182	lin-13
WBGene00003003	735.921	0.158216	0.0804871	1.96573	0.0493297	0.112835	lin-14
WBGene00003006	352.025	0.186793	0.12618	1.48037	0.138776	0.252835	lin-17
WBGene00003007	400.07	0.407305	0.102355	3.97934	6.9108e-05	0.000423448	lin-18
WBGene00003008	13.8977	0.142162	0.424439	0.334941	0.73767	0.83129	lin-22
WBGene00003009	3034.17	0.175367	0.0801933	2.1868	0.0287571	0.0729086	lin-23
WBGene00003010	908.693	0.0151875	0.0753744	0.201494	0.840313	0.901345	lin-24
WBGene00003011	230.939	0.179911	0.139048	1.29388	0.195708	0.328927	lin-25
WBGene00003012	1544.77	0.17364	0.0929112	1.86889	0.0616388	0.13448	lin-26
WBGene00003014	676.555	0.207867	0.0829087	2.50718	0.0121698	0.0358469	lin-28
WBGene00003015	483.307	0.115644	0.138947	0.832288	0.405247	0.557214	lin-29
WBGene00003017	46.6016	0.0737343	0.22549	0.326996	0.743671	0.835121	lin-31
WBGene00003018	2.70703	-0.720596	1.09513	-0.658	0.510538	0.651249	lin-32
WBGene00003019	451.673	-0.269149	0.113603	-2.36921	0.0178261	0.049188	lin-33
WBGene00003020	1402.16	-0.0506251	0.0817628	-0.61917	0.535805	0.672893	lin-35
WBGene00003021	2112.05	0.0224818	0.0475121	0.47318	0.636085	0.754096	lin-36
WBGene00003022	603.991	-0.150572	0.132219	-1.13881	0.254783	0.400964	lin-37
WBGene00003024	200.414	0.171304	0.122861	1.39429	0.163229	0.287007	lin-39
WBGene00003025	1613.07	0.30655	0.0711561	4.30814	1.64635e-05	0.000120293	lin-40
WBGene00003026	4135.93	0.252355	0.189617	1.33087	0.183233	0.313018	lin-41
WBGene00003029	77.3306	0.157157	0.182473	0.861262	0.389094	0.54141	lin-44
WBGene00003030	1853.16	0.0492552	0.118625	0.415217	0.677983	0.785048	lin-45
WBGene00003031	46.624	-0.132923	0.26403	-0.503439	0.614655	0.737319	lin-46
WBGene00003033	32.7989	-0.0145394	0.240824	-0.0603735	0.951858	0.970977	lin-48
WBGene00003034	1511.98	0.0210411	0.0668717	0.314649	0.753028	0.840305	lin-49
WBGene00003035	360.875	0.0773198	0.110864	0.697427	0.485535	0.629342	lin-52
WBGene00003036	2711.59	0.068942	0.0855631	0.805744	0.420391	0.571687	lin-53
WBGene00003037	994.162	-0.0181036	0.11148	-0.162394	0.870996	0.921542	lin-54
WBGene00003038	261.412	0.0763602	0.102929	0.741876	0.458163	0.605086	lin-56
WBGene00003040	1943.65	0.346744	0.0601363	5.76597	8.11887e-09	1.21555e-07	lin-59
WBGene00003041	1132.69	-0.123396	0.072078	-1.71197	0.0869013	0.176062	lin-61
WBGene00003043	1075.23	0.251088	0.153071	1.64034	0.100935	0.198034	lip-1
WBGene00003044	977.389	0.0592309	0.0907909	0.652388	0.514151	0.654491	lir-1
WBGene00003045	334.82	-0.0688199	0.0890917	-0.772462	0.439841	0.589549	lir-2
WBGene00003046	46.0571	0.530232	0.211265	2.50979	0.0120802	0.0356213	lir-3
WBGene00003047	1951.34	-0.141597	0.0471362	-3.004	0.00266457	0.010024	lis-1
WBGene00003048	2774	0.0418076	0.167512	0.24958	0.802912	0.876375	lit-1
WBGene00003052	8060.73	0.0218305	0.0555234	0.393176	0.694189	0.797179	lmn-1
WBGene00003053	2678.36	0.2617	0.123817	2.11361	0.0345487	0.084774	lmp-1
WBGene00003055	1954.74	-0.0341929	0.189545	-0.180394	0.856843	0.91165	lon-1
WBGene00003056	471.233	0.414424	0.105245	3.9377	8.22677e-05	0.000492252	lon-2
WBGene00003057	4930.86	0.007251	0.699662	0.0103636	0.991731	0.994656	lon-3
WBGene00003058	2.38582	0.424394	1.04965	0.404318	0.685979	NA	lov-1
WBGene00003059	871.28	-0.247426	0.0761404	-3.2496	0.00115569	0.00494557	lpd-2
WBGene00003060	3798.47	-0.159217	0.0729213	-2.18341	0.0290055	0.0733968	lpd-3
WBGene00003061	3157.65	-0.178643	0.0577114	-3.09546	0.00196507	0.00777068	lpd-5
WBGene00003062	2955.9	-0.392561	0.0681597	-5.75942	8.44012e-09	1.25924e-07	lpd-6
WBGene00003063	5735.7	0.112939	0.0352699	3.20214	0.00136412	0.00571873	lpd-7
WBGene00003064	995.372	-0.264777	0.0855443	-3.09521	0.00196676	0.00777554	lpd-8
WBGene00003065	1984.13	-0.181849	0.0665668	-2.73182	0.00629853	0.0206641	lpd-9
WBGene00003066	1278.71	-0.42718	0.0936227	-4.56278	5.04809e-06	4.17005e-05	lpl-1
WBGene00003067	404.766	-0.11098	0.0956323	-1.16049	0.245849	0.390356	lrg-1
WBGene00003068	1150.56	0.172591	0.0777855	2.21881	0.0264998	0.0683521	lrk-1
WBGene00003071	5022.72	0.120117	0.516348	0.232627	0.816051	0.88542	lrp-1
WBGene00003072	3549.06	0.249315	0.107024	2.32952	0.0198314	0.0538429	lrp-2
WBGene00003073	7946.66	-0.303012	0.0630022	-4.80955	1.51272e-06	1.40981e-05	lars-1
WBGene00003074	1034.5	-0.401483	0.0786817	-5.10262	3.34985e-07	3.60362e-06	lars-2
WBGene00003075	433.952	-0.092338	0.299328	-0.308484	0.757714	0.843974	lrx-1
WBGene00003076	554.406	-0.0888702	0.0993104	-0.894873	0.370855	0.523883	lsm-1
WBGene00003077	585.035	-0.484137	0.0907436	-5.33522	9.54295e-08	1.14482e-06	lsm-3
WBGene00003078	667.92	0.0916967	0.0985546	0.930416	0.352156	0.505112	lsm-4
WBGene00003079	598.29	-0.106787	0.0856968	-1.24611	0.212725	0.349758	lsm-5
WBGene00003080	343.305	-0.201393	0.114003	-1.76656	0.0773015	0.16026	lsm-6
WBGene00003081	694.044	-0.285074	0.0731428	-3.8975	9.71918e-05	0.000570952	lsm-7
WBGene00003082	880.856	-0.600779	0.113455	-5.2953	1.18822e-07	1.40085e-06	lsm-8
WBGene00003083	820.544	0.213838	0.0843557	2.53495	0.0112462	0.0335697	lst-1
WBGene00003084	922.036	0.0955981	0.070594	1.3542	0.175674	0.303472	lst-2
WBGene00003085	7292.75	-0.0751472	0.040608	-1.85055	0.0642343	0.138805	ccar-1
WBGene00003086	1449.36	0.114178	0.0657791	1.73578	0.0826023	0.169074	lst-4
WBGene00003087	442.192	0.508698	0.102958	4.94081	7.77995e-07	7.76767e-06	lsy-2
WBGene00003089	856.928	-0.0387875	0.261343	-0.148416	0.882014	0.927965	ltd-1
WBGene00003090	23569.9	0.492247	0.135529	3.63205	0.000281177	0.00145644	lys-1
WBGene00003091	9803.87	1.26344	0.133631	9.4547	3.23936e-21	2.53844e-19	lys-2
WBGene00003092	283.444	2.20445	0.260507	8.46215	2.62485e-17	1.31496e-15	lys-3
WBGene00003093	3408.99	-0.756154	0.113514	-6.66135	2.71315e-11	6.05076e-10	lys-4
WBGene00003094	24.9289	-1.4331	0.447631	-3.20152	0.00136707	0.00572674	lys-5
WBGene00003095	31.0909	-0.362945	0.330753	-1.09733	0.272497	0.420436	lys-6
WBGene00003096	2369.05	0.996127	0.181233	5.4964	3.87622e-08	4.94899e-07	lys-7
WBGene00003097	9161.92	0.610372	0.106149	5.75015	8.9166e-09	1.31995e-07	lys-8
WBGene00003098	0.0605576	0.309071	3.81693	0.0809737	0.935463	NA	lys-9
WBGene00003099	6.25647	2.28868	0.78408	2.91894	0.00351229	0.0126397	lys-10
WBGene00003100	43.4619	1.06791	0.500545	2.13348	0.0328851	0.0813266	mab-3
WBGene00003102	78.4048	0.0544952	0.187008	0.291407	0.77074	0.853888	mab-5
WBGene00003104	1349.06	-0.0609795	0.452955	-0.134626	0.892908	0.93494	mab-7
WBGene00003106	30.1095	0.455378	0.263292	1.72956	0.0837097	0.170911	mab-9
WBGene00003107	700.001	0.594524	0.313774	1.89475	0.0581255	0.128905	mab-10
WBGene00003111	202.244	0.517804	0.136179	3.80239	0.000143307	0.000804243	mab-20
WBGene00003112	75.2574	0.680286	0.192364	3.53645	0.000405542	0.00200054	mab-21
WBGene00003114	11.8581	-0.984506	1.23696	-0.795907	0.426086	0.577044	mab-23
WBGene00003119	1692.5	-0.205045	0.0502725	-4.07867	4.52943e-05	0.00029376	mac-1
WBGene00003123	2075.78	-0.284245	0.0555771	-5.11442	3.14702e-07	3.41192e-06	mag-1
WBGene00003124	108.995	-0.235277	0.250269	-0.940099	0.347167	0.500319	mai-1
WBGene00003129	867.877	0.0895889	0.118181	0.758067	0.448411	0.596729	map-1
WBGene00003130	3552.91	-0.587892	0.0604177	-9.73046	2.23575e-22	1.95863e-20	map-2
WBGene00003132	3104.12	0.0557591	0.0829997	0.671799	0.501712	0.643208	mat-1
WBGene00003133	2120.86	-0.195552	0.0606487	-3.22434	0.00126263	0.00533901	mat-2
WBGene00003134	924.631	-0.121492	0.0641922	-1.89263	0.0584067	0.129361	mat-3
WBGene00003136	989.157	-0.129543	0.0875941	-1.4789	0.139168	0.253319	mau-2
WBGene00003142	411.96	0.102586	0.111745	0.918037	0.358599	0.511818	mau-8
WBGene00003143	236.005	0.491562	0.174181	2.82214	0.00477048	0.0163807	max-1
WBGene00003144	4552.6	-0.0782029	0.0887915	-0.880747	0.378455	0.53128	max-2
WBGene00003148	3204.27	-0.411621	0.081447	-5.05385	4.32997e-07	4.55194e-06	mbf-1
WBGene00003149	959.425	0.120515	0.125223	0.9624	0.335849	0.488281	mbk-1
WBGene00003150	6215.21	0.0626658	0.0653483	0.958952	0.337583	0.490248	mbk-2
WBGene00003151	4898.47	0.446078	0.095939	4.6496	3.32584e-06	2.87527e-05	mca-1
WBGene00003153	11382.9	-0.122771	0.0631853	-1.94303	0.0520124	0.117918	mca-3
WBGene00003154	2796.02	-0.212573	0.123371	-1.72303	0.0848826	0.172814	mcm-2
WBGene00003155	2119.86	0.127537	0.116118	1.09834	0.272054	0.420044	mcm-3
WBGene00003156	1986.76	-0.144891	0.102693	-1.41091	0.158271	0.280151	mcm-4
WBGene00003157	2239.47	-0.0840312	0.101039	-0.831674	0.405593	0.557421	mcm-5
WBGene00003158	2450.62	0.143294	0.123962	1.15596	0.247699	0.392746	mcm-6
WBGene00003159	2769.33	0.0130245	0.127858	0.101866	0.918863	0.951387	mcm-7
WBGene00003160	1672.12	-0.179991	0.0576183	-3.12385	0.00178502	0.00717999	mdf-1
WBGene00003161	620.889	0.143222	0.130559	1.09699	0.272646	0.420628	mdf-2
[truncated: 19,883 more rows]

## Sheet: full_results_raga_vs_rescue_04-
gene	baseMean	log2FoldChange	lfcSE	stat	pvalue	padj	symbol
WBGene00000001	838.043	-0.137841	0.125047	-1.10231	0.270327	0.614176	aap-1
WBGene00000002	423.817	0.421258	0.251214	1.67689	0.0935649	0.397122	aat-1
WBGene00000003	335.794	0.0686324	0.0837208	0.819778	0.412343	0.727831	aat-2
WBGene00000004	244.963	0.372938	0.114068	3.26945	0.00107758	0.0332317	aat-3
WBGene00000005	362.201	0.376593	0.232498	1.61977	0.105282	0.419829	aat-4
WBGene00000006	350.844	-0.0811336	0.127858	-0.634562	0.525714	0.800305	aat-5
WBGene00000007	519.123	0.0431464	0.120207	0.358935	0.719644	0.89725	aat-6
WBGene00000008	26.1274	0.357756	0.358477	0.997989	0.318284	0.65438	aat-7
WBGene00000009	48.8614	0.284339	0.26199	1.0853	0.277788	0.620547	aat-8
WBGene00000010	871.613	-0.0711984	0.0775285	-0.918351	0.358435	0.687975	aat-9
WBGene00000012	0.899936	2.0517	1.47093	1.39483	0.163067	NA	abf-1
WBGene00000013	17.2299	0.524768	0.379445	1.38299	0.166669	0.503472	abf-2
WBGene00000014	0	NA	NA	NA	NA	NA	abf-3
WBGene00000015	4.68617	0.849814	0.686365	1.23814	0.215665	0.565195	abf-4
WBGene00000016	51.5972	0.327906	0.336498	0.974465	0.329825	0.664751	abf-5
WBGene00000017	98.2732	0.415373	0.271807	1.52819	0.126465	0.449881	abf-6
WBGene00000018	969.187	0.120574	0.107027	1.12658	0.25992	0.605019	abl-1
WBGene00000019	570.413	-0.159718	0.0973237	-1.64111	0.100775	0.410642	abt-1
WBGene00000020	1137.15	0.110814	0.069261	1.59994	0.109611	0.425786	abt-2
WBGene00000021	85.7067	-0.3043	0.192301	-1.58242	0.113554	0.43146	abt-3
WBGene00000022	2876.45	-0.0345374	0.159516	-0.216514	0.828587	0.939715	abt-4
WBGene00000023	638.753	0.0222543	0.174194	0.127756	0.898342	0.962895	abt-5
WBGene00000024	3945.22	-0.673591	0.184626	-3.64841	0.000263871	0.0122973	abu-1
WBGene00000025	39.2947	-0.60285	0.405463	-1.48682	0.137063	0.466367	abu-2
WBGene00000026	0.159542	0.532217	3.81698	0.139434	0.889107	NA	abu-3
WBGene00000027	136.037	-0.680775	0.160223	-4.24891	2.14811e-05	0.00195842	abu-4
WBGene00000028	5.0451	-1.50115	1.05363	-1.42474	0.154232	0.489203	abu-5
WBGene00000029	1904.38	-0.704168	0.247463	-2.84555	0.00443344	0.0834072	abu-6
WBGene00000030	2092.66	-0.697952	0.240286	-2.90467	0.00367638	0.0746189	abu-7
WBGene00000031	4096.94	-0.59032	0.220736	-2.67432	0.00748798	0.114583	abu-8
WBGene00000032	941.061	-0.538207	0.256265	-2.1002	0.0357116	0.254948	abu-9
WBGene00000033	1787.3	-0.574774	0.231507	-2.48276	0.013037	0.153444	abu-10
WBGene00000034	2930.15	-0.681912	0.164741	-4.13929	3.48378e-05	0.0027944	abu-11
WBGene00000035	288.495	-0.10342	0.125961	-0.821048	0.411619	0.727253	ace-1
WBGene00000036	561.406	-0.0569631	0.144297	-0.394763	0.693018	0.883428	ace-2
WBGene00000037	90.6225	-0.0465182	0.135618	-0.343009	0.731592	0.901335	ace-3
WBGene00000038	21.1694	0.145702	0.298231	0.488553	0.625158	0.850332	ace-4
WBGene00000039	3367	0.492274	0.429787	1.14539	0.252047	0.598172	acn-1
WBGene00000040	4478.53	0.123813	0.115385	1.07304	0.283252	0.625619	aco-1
WBGene00000041	22840.1	-0.0552275	0.0524025	-1.05391	0.291924	0.634285	aco-2
WBGene00000042	63.6793	0.00565116	0.206672	0.0273436	0.978186	0.992221	acr-2
WBGene00000043	29.0181	-0.428032	0.274451	-1.55959	0.118856	0.440794	acr-3
WBGene00000044	22.7172	0.146795	0.264471	0.55505	0.578861	0.828891	acr-5
WBGene00000045	6.75323	0.554468	0.612166	0.905748	0.365069	0.69265	acr-6
WBGene00000046	30.4083	-0.233155	0.272148	-0.856722	0.391599	0.713613	acr-7
WBGene00000047	136.376	0.368895	0.165481	2.22923	0.0257989	0.217718	acr-8
WBGene00000048	33.8349	-0.0766597	0.242997	-0.315475	0.752401	0.911822	acr-9
WBGene00000049	7.38994	0.430624	0.517418	0.832256	0.405264	0.722459	acr-10
WBGene00000050	39.2016	0.0062204	0.209135	0.0297435	0.976272	0.991599	acr-11
WBGene00000051	82.0881	0.0517981	0.164607	0.314678	0.753006	0.911874	acr-12
WBGene00000053	8.95248	-0.020617	0.48233	-0.0427446	0.965905	0.987582	acr-14
WBGene00000054	104.352	-0.086581	0.171376	-0.50521	0.613411	0.844811	acr-15
WBGene00000055	127.944	-0.0333221	0.165168	-0.201746	0.840115	0.942977	acr-16
WBGene00000056	50.6175	-0.272902	1.10986	-0.245888	0.805769	0.931483	acr-17
WBGene00000057	61.4234	0.308313	0.22824	1.35083	0.17675	0.517441	acr-18
WBGene00000058	28.0344	-0.294283	0.293789	-1.00168	0.316499	0.652877	acr-19
WBGene00000059	38.9514	0.205652	0.217644	0.9449	0.34471	0.677322	acr-20
WBGene00000060	22.7011	0.0144159	0.295263	0.048824	0.96106	0.986178	acr-21
WBGene00000061	21.2588	-0.0874011	0.316809	-0.27588	0.78264	0.923645	lgc-11
WBGene00000062	15.5332	0.315972	0.378202	0.835457	0.403461	0.721517	acr-23
WBGene00000063	63652.4	-0.171385	0.108594	-1.57823	0.114513	0.432542	act-1
WBGene00000064	29314.8	-0.21988	0.0898745	-2.44652	0.0144241	0.162165	act-2
WBGene00000065	83599.3	-0.117698	0.0671389	-1.75305	0.0795928	0.370439	act-3
WBGene00000066	71106.6	-0.161538	0.0964063	-1.6756	0.0938168	0.397582	act-4
WBGene00000067	21513.7	-0.236151	0.0986625	-2.39352	0.0166876	0.175656	act-5
WBGene00000068	477.446	0.214427	0.112856	1.90001	0.0574315	0.321323	acy-1
WBGene00000069	58.2252	0.225318	0.196801	1.1449	0.252249	0.598566	acy-2
WBGene00000070	700.314	0.369598	0.178453	2.07112	0.0383473	0.264537	acy-3
WBGene00000071	340.422	0.084222	0.201848	0.417255	0.676492	0.876424	acy-4
WBGene00000072	466.374	-0.00848337	0.0867317	-0.0978117	0.922082	0.971632	add-1
WBGene00000073	335.645	0.123518	0.121166	1.01941	0.308007	0.646727	add-2
WBGene00000074	696.796	0.0539779	0.106648	0.506132	0.612764	0.844811	adm-2
WBGene00000075	269.994	0.28598	0.1068	2.67771	0.00741273	0.113775	adm-4
WBGene00000079	2331.33	-0.0446408	0.0801651	-0.55686	0.577623	0.828495	adr-1
WBGene00000080	1052.97	-0.149192	0.0790734	-1.88675	0.0591933	0.32487	adr-2
WBGene00000081	8249.17	-0.11973	0.105028	-1.13998	0.254295	0.600323	ads-1
WBGene00000082	2139.51	-0.286835	0.201141	-1.42604	0.153857	0.488944	adt-1
WBGene00000083	1613.93	0.155766	0.0760013	2.04951	0.040412	0.271978	adt-2
WBGene00000084	390.338	-0.0739293	0.138817	-0.532568	0.594333	0.835652	aex-1
WBGene00000085	25.5118	0.280539	0.280899	0.998718	0.317931	0.654214	aex-2
WBGene00000086	497.89	0.127468	0.0847723	1.50365	0.13267	0.462007	aex-3
WBGene00000088	739.64	1.13483	0.07913	14.3413	1.20692e-46	1.00681e-42	aex-5
WBGene00000089	214.023	0.00825285	0.117464	0.0702584	0.943988	0.978777	aex-6
WBGene00000090	1064.03	-0.122606	0.0480398	-2.55218	0.0107052	0.137813	age-1
WBGene00000092	540.783	0.0685865	0.111766	0.613663	0.539438	0.808321	ags-3
WBGene00000093	358.79	-0.223758	0.0987202	-2.26658	0.0234156	0.206912	agt-1
WBGene00000094	187.217	-0.166337	0.12113	-1.37321	0.169687	0.50745	agt-2
WBGene00000095	374.395	0.206827	0.0763124	2.71027	0.00672294	0.10713	aha-1
WBGene00000096	21.0962	0.636297	0.330537	1.92504	0.0542239	0.313024	ahr-1
WBGene00000097	579.039	-0.210094	0.119108	-1.76389	0.0777511	0.36754	aip-1
WBGene00000098	3113.36	-0.213596	0.06634	-3.21972	0.00128315	0.0365889	air-1
WBGene00000099	831.965	-0.240073	0.133505	-1.79823	0.0721406	0.352857	air-2
WBGene00000100	8046.11	-0.00872541	0.051522	-0.169353	0.865519	0.953363	ajm-1
WBGene00000101	3560.06	-0.0870774	0.0970424	-0.897312	0.369552	0.696141	aka-1
WBGene00000102	2710.6	-0.0454052	0.0455171	-0.997541	0.318502	0.65438	akt-1
WBGene00000103	382.406	0.10912	0.0873522	1.2492	0.211592	0.560484	akt-2
WBGene00000105	3755.51	0.122624	0.152787	0.802583	0.422216	0.735435	alg-1
WBGene00000106	1080.56	-0.025632	0.111423	-0.230042	0.818059	0.936452	alg-2
WBGene00000107	7069.41	-0.0198365	0.0653571	-0.303509	0.761502	0.915959	alh-1
WBGene00000108	0.642167	-0.538022	1.60802	-0.334587	0.737937	NA	alh-2
WBGene00000109	2982.15	0.168812	0.106354	1.58727	0.112451	0.430303	alh-3
WBGene00000110	5833.11	-0.104826	0.187062	-0.560382	0.575219	0.827482	alh-4
WBGene00000111	298.418	0.119894	0.115455	1.03844	0.299064	0.639444	alh-5
WBGene00000112	2516.95	0.00593727	0.0658171	0.0902087	0.928121	0.973962	alh-6
WBGene00000113	1139.85	0.21743	0.0785893	2.76666	0.00566345	0.0958189	alh-7
WBGene00000114	8628.74	0.106227	0.0831516	1.27751	0.201421	0.548834	alh-8
WBGene00000115	3802.48	0.156092	0.146797	1.06331	0.28764	0.629871	alh-9
WBGene00000116	497.643	-0.0154688	0.090998	-0.169991	0.865018	0.953107	alh-10
WBGene00000117	1206.5	0.0759425	0.0753279	1.00816	0.313378	0.650795	alh-11
WBGene00000118	3986.49	0.0942966	0.120881	0.780079	0.435344	0.743732	alh-12
WBGene00000120	402.826	0.181669	0.161451	1.12522	0.260494	0.605512	aly-1
WBGene00000121	2358.17	-0.0751401	0.124942	-0.601402	0.547572	0.812784	aly-2
WBGene00000122	3279.5	0.00443842	0.0638402	0.0695239	0.944573	0.979079	aly-3
WBGene00000123	4867.86	-0.0567038	0.0758662	-0.747418	0.454811	0.758095	ama-1
WBGene00000133	299.726	-0.382311	0.310432	-1.23155	0.218119	0.568145	amt-1
WBGene00000134	19.3266	0.317531	0.320843	0.989675	0.322333	0.657434	amt-2
WBGene00000135	70.1775	0.212287	0.19447	1.09162	0.275002	0.617846	amt-3
WBGene00000136	493.079	0.454281	0.181001	2.50982	0.0120793	0.148403	amt-4
WBGene00000137	180.73	0.445678	0.119995	3.71416	0.000203883	0.0104024	amx-1
WBGene00000138	1639.76	-0.362073	0.165367	-2.18951	0.0285596	0.229006	amx-2
WBGene00000139	291.459	0.192297	0.163879	1.17341	0.240631	0.589181	amx-3
WBGene00000140	29084.5	-0.0712212	0.0894798	-0.795947	0.426063	0.738135	anc-1
WBGene00000142	1421.89	-0.0747436	0.0719394	-1.03898	0.298814	0.639237	aos-1
WBGene00000143	909.609	-0.111349	0.129438	-0.860248	0.389652	0.711887	apc-2
WBGene00000144	357.832	-0.116405	0.13566	-0.858068	0.390855	0.712992	apc-10
WBGene00000145	304.691	-0.210387	0.121169	-1.73631	0.0825093	0.377664	apc-11
WBGene00000146	2610.55	-0.0192637	0.0907644	-0.212239	0.831921	0.940619	ape-1
WBGene00000147	388.701	-0.183634	0.133349	-1.37709	0.168484	0.50612	aph-1
WBGene00000148	806.964	-0.0173815	0.0593828	-0.292703	0.769749	0.918305	aph-2
WBGene00000149	10314.1	0.042055	0.0752201	0.559092	0.576099	0.827876	apl-1
WBGene00000150	1893.39	0.102273	0.118191	0.865314	0.386867	0.708972	apm-1
WBGene00000151	869.004	-0.125679	0.11219	-1.12023	0.262616	0.60711	apn-1
WBGene00000155	4393.07	0.0795347	0.0857318	0.927716	0.353555	0.684153	app-1
WBGene00000156	1236.48	-0.115327	0.0674558	-1.70968	0.087326	0.387206	2019-04-01
WBGene00000157	441.53	0.225378	0.160812	1.4015	0.161064	0.496288	aps-2
WBGene00000158	2732.16	0.0283438	0.063988	0.442955	0.657798	0.866156	apg-1
WBGene00000159	953.055	-0.0646918	0.0823329	-0.785734	0.432024	0.742129	aps-1
WBGene00000160	2595.44	0.0408564	0.118184	0.345701	0.729567	0.900437	apb-1
WBGene00000161	1418.03	0.493409	0.1734	2.84549	0.00443432	0.0834072	apa-2
WBGene00000162	1275.61	0.0237383	0.0602597	0.393932	0.693631	0.88374	apd-3
WBGene00000163	1881.2	0.0348769	0.0526891	0.661938	0.508011	0.789047	apb-3
WBGene00000164	320.891	0.185767	0.112602	1.64977	0.0989905	0.407088	apm-3
WBGene00000165	817.725	-0.109382	0.0740325	-1.47748	0.139546	0.468916	aps-3
WBGene00000166	54.0794	0.560368	0.20526	2.73005	0.00633255	0.102875	apt-9
WBGene00000168	923.485	-0.181277	0.17468	-1.03777	0.299379	0.639618	apx-1
WBGene00000169	1159.25	0.0411842	0.11341	0.363144	0.716497	0.895635	aqp-1
WBGene00000170	2035.19	0.0197637	0.118821	0.166332	0.867896	0.954571	aqp-2
WBGene00000171	15.1549	-0.504267	0.367826	-1.37094	0.170394	0.508289	aqp-3
WBGene00000172	1387.63	-0.174589	0.110724	-1.57679	0.114843	0.432542	aqp-4
WBGene00000173	7.56665	0.42958	0.49892	0.86102	0.389227	0.711344	aqp-5
WBGene00000174	23.0714	0.104893	0.35449	0.295898	0.767308	0.917393	aqp-6
WBGene00000175	3229.76	-0.0535832	0.122052	-0.439019	0.660648	0.867772	aqp-7
WBGene00000176	696.372	0.0964754	0.189513	0.509071	0.610702	0.843317	aqp-8
WBGene00000177	160.721	0.296955	0.151847	1.95563	0.0505091	0.304362	aqp-9
WBGene00000178	2339.9	-0.019126	0.0927078	-0.206304	0.836553	0.942022	aqp-10
WBGene00000179	1530.43	-0.0422743	0.0742636	-0.569247	0.569189	0.824192	aqp-11
WBGene00000180	505.354	0.217182	0.0997748	2.17672	0.0295015	0.231817	arc-1
WBGene00000181	3806.39	-0.0116015	0.0640168	-0.181225	0.856191	0.949253	ard-1
WBGene00000182	9709.27	0.00876868	0.090147	0.0972709	0.922511	0.971632	arf-1.2
WBGene00000183	10423.7	0.0740365	0.123567	0.59916	0.549066	0.81376	arf-3
WBGene00000184	696.556	-0.0862293	0.072413	-1.1908	0.233733	0.583485	arf-6
WBGene00000185	0.490895	-0.992154	2.21686	-0.44755	0.654478	NA	arg-1
WBGene00000186	838.586	-0.00561467	0.0706668	-0.0794527	0.936673	0.977787	ark-1
WBGene00000187	900.943	0.0951556	0.101802	0.934712	0.349937	0.681604	arl-1
WBGene00000188	66.7719	0.0205922	0.227406	0.0905525	0.927848	0.973859	arl-3
WBGene00000189	202.035	0.0438947	0.114755	0.382509	0.702084	0.888064	arl-5
WBGene00000190	119.272	0.026393	0.145024	0.18199	0.855591	0.949085	arf-1.1
WBGene00000191	66.1477	0.204127	0.382808	0.533236	0.59387	0.835389	arl-7
WBGene00000192	1852.83	0.040451	0.0660388	0.612534	0.540185	0.808799	arl-8
WBGene00000193	8.26371	0.42148	0.456028	0.92424	0.355361	0.685397	arl-6
WBGene00000195	264.159	0.216248	0.133326	1.62195	0.104815	0.418957	arr-1
WBGene00000196	734.584	0.0320544	0.0623017	0.514504	0.6069	0.842009	aars-1
WBGene00000197	6853	0.0396395	0.0669937	0.591689	0.554059	0.815819	aars-2
WBGene00000198	4659.07	-0.0871534	0.113861	-0.765438	0.444011	0.750013	art-1
WBGene00000199	1990.9	0.018171	0.0482808	0.37636	0.706649	0.89044	arx-1
WBGene00000200	2127.42	-0.0525113	0.0499731	-1.05079	0.293354	0.635773	arx-2
WBGene00000201	1586.06	0.00287102	0.0517037	0.0555284	0.955718	0.983846	arx-3
WBGene00000202	688.738	-0.0518575	0.0959544	-0.540439	0.588895	0.832941	exos-4.2
WBGene00000203	873.516	-0.104748	0.0780126	-1.3427	0.179369	0.521072	arx-5
WBGene00000204	1002.77	-0.0663941	0.0645517	-1.02854	0.303695	0.643694	arx-6
WBGene00000205	493.319	-0.0159354	0.0997032	-0.159829	0.873016	0.955939	arx-7
WBGene00000206	4739.33	-0.334774	0.0772541	-4.33341	1.4682e-05	0.00144091	asb-1
WBGene00000207	9168.14	0.0578254	0.0965836	0.598708	0.549368	0.813866	asb-2
WBGene00000208	897.616	0.0199029	0.0540333	0.368345	0.712616	0.89318	asc-1
WBGene00000209	3320.04	-0.147758	0.0597901	-2.47128	0.0134629	0.156526	asg-1
WBGene00000210	4395.93	0.00408717	0.0786334	0.0519775	0.958547	0.98528	asg-2
WBGene00000211	243.327	0.0178168	0.110554	0.161159	0.871968	0.955214	asm-1
WBGene00000212	380.91	0.211112	0.137222	1.53847	0.123934	0.447776	asm-2
WBGene00000213	19.723	-0.461685	0.390494	-1.18231	0.237082	0.586175	asm-3
WBGene00000214	70431.2	-0.0232803	0.107096	-0.217377	0.827914	0.939463	asp-1
WBGene00000215	15571.4	0.110334	0.0841388	1.31133	0.189746	0.532476	asp-2
WBGene00000216	41832.7	0.0697358	0.061892	1.12673	0.259855	0.605019	asp-3
WBGene00000217	12072.3	-0.112446	0.0791643	-1.42041	0.155487	0.489761	asp-4
WBGene00000218	24384.8	0.0018836	0.0729471	0.0258214	0.9794	0.992569	asp-5
WBGene00000219	34115.2	0.0960169	0.0865234	1.10972	0.267119	0.611381	asp-6
WBGene00000220	171.081	1.12467	0.451288	2.49213	0.012698	0.151215	atf-2
WBGene00000221	2513.05	0.0472537	0.10116	0.46712	0.640414	0.858176	atf-5
WBGene00000222	332.456	-0.0877901	0.106955	-0.820814	0.411752	0.727411	atf-6
WBGene00000223	4683.2	-0.13507	0.084897	-1.59098	0.111614	0.428959	atf-7
WBGene00000224	1959.34	0.181436	0.0818531	2.21661	0.0266501	0.220879	atgp-1
WBGene00000225	708.152	-0.0945925	0.0946691	-0.999191	0.317702	0.654146	atgp-2
WBGene00000226	2004.51	-0.0279165	0.0728233	-0.383346	0.701463	0.887668	atl-1
WBGene00000227	1114.77	-0.0364825	0.0616853	-0.591429	0.554233	0.815819	atm-1
WBGene00000228	10570.7	-0.098463	0.0519963	-1.89365	0.0582708	0.322773	atn-1
WBGene00000229	57128.8	-0.1092	0.0958704	-1.13903	0.25469	0.600685	atp-2
WBGene00000230	15223.2	-0.0622355	0.0614079	-1.01348	0.310832	0.648727	atp-3
WBGene00000231	5677.59	-0.120096	0.0753978	-1.59283	0.111198	0.42818	atx-2
WBGene00000232	223.856	0.157506	0.116026	1.35751	0.17462	0.514366	avr-14
WBGene00000233	397.86	-0.150043	0.208557	-0.719435	0.471873	0.767996	avr-15
WBGene00000235	2056.91	-0.123013	0.0747408	-1.64586	0.0997933	0.408778	baf-1
WBGene00000236	830.678	0.0501671	0.110684	0.453245	0.650372	0.862888	bag-1
WBGene00000237	980.387	0.0818858	0.0836414	0.97901	0.327575	0.662616	bam-2
WBGene00000238	638.435	-0.0788069	0.0695084	-1.13378	0.256889	0.602951	bar-1
WBGene00000239	1120.47	0.245687	0.14902	1.64868	0.0992132	0.407602	bas-1
WBGene00000240	1573.69	0.100884	0.11503	0.87702	0.380476	0.703542	pah-1
WBGene00000241	16.2503	0.653311	0.351638	1.85791	0.0631823	0.333374	bbs-1
WBGene00000242	17.8432	0.675529	0.342121	1.97453	0.0483215	0.297045	bbs-2
WBGene00000244	30.1153	0.452555	0.253635	1.78428	0.074379	0.359068	bbs-8
WBGene00000245	586.055	0.114105	0.103907	1.09814	0.272143	0.615396	bca-1
WBGene00000246	118.662	0.310143	0.210592	1.47272	0.140827	0.470949	bcc-1
WBGene00000247	625.328	-0.242266	0.11257	-2.15213	0.031387	0.239198	bec-1
WBGene00000248	1578.29	-0.0104272	0.0752189	-0.138625	0.889746	0.960003	ben-1
WBGene00000249	531.413	-0.215067	0.108182	-1.98801	0.0468102	0.29324	bir-1
WBGene00000250	332.89	-0.329601	0.107538	-3.06497	0.0021769	0.0535114	bir-2
WBGene00000251	4746.39	1.43153	0.917602	1.56008	0.118742	0.440633	bli-1
WBGene00000252	5198.39	0.918098	0.820031	1.11959	0.262889	0.60711	bli-2
WBGene00000253	1827.84	0.0336872	0.071322	0.472326	0.636694	0.855763	bli-3
WBGene00000254	8560.08	-0.0429663	0.0971096	-0.442452	0.658162	0.866506	bli-4
WBGene00000255	206.933	-0.133922	0.160524	-0.834279	0.404124	0.72166	bli-5
WBGene00000256	33445.7	-0.294538	0.280435	-1.05029	0.293585	0.635878	bli-6
WBGene00000257	2349.47	-0.133506	0.0441493	-3.02397	0.00249483	0.058768	bmk-1
WBGene00000259	777.62	0.0517366	0.066866	0.773736	0.439087	0.746913	bpl-1
WBGene00000262	72.0409	0.0924926	0.179674	0.514781	0.606706	0.842009	bra-1
WBGene00000263	7074.32	-0.106953	0.116859	-0.915235	0.360068	0.689236	F23H11.5
WBGene00000264	468.942	-0.118316	0.115601	-1.02349	0.306078	0.645669	brc-1
WBGene00000265	611.938	-0.13046	0.0925121	-1.4102	0.158481	0.493153	brd-1
WBGene00000266	1987.93	0.277022	0.130457	2.12348	0.0337138	0.248118	bre-1
WBGene00000267	201.913	-0.0842702	0.108931	-0.77361	0.439161	0.746926	bre-2
WBGene00000268	3004.27	-0.213057	0.107455	-1.98275	0.0473951	0.294503	bre-3
WBGene00000269	423.055	0.127785	0.116833	1.09374	0.274071	0.617032	bre-4
WBGene00000270	252.24	-0.066507	0.108904	-0.610693	0.541403	0.80916	bre-5
WBGene00000271	1175.65	-0.14502	0.105747	-1.37139	0.170254	0.508235	brf-1
WBGene00000272	6.25207	0.851788	0.567107	1.50199	0.1331	0.462441	bro-1
WBGene00000273	7565.62	-0.0327091	0.151433	-0.215998	0.82899	0.939788	brp-1
WBGene00000274	1664.6	-0.0879462	0.0537922	-1.63492	0.102065	0.413514	btf-1
WBGene00000275	3172.6	-0.147561	0.0585928	-2.51842	0.0117882	0.146226	bub-1
WBGene00000276	3138.52	-0.134735	0.0547868	-2.45926	0.0139225	0.159264	byn-1
WBGene00000277	2080.76	-0.00438606	0.0844725	-0.0519229	0.95859	0.98528	cab-1
WBGene00000279	55.5971	0.329949	0.237357	1.3901	0.1645	0.500732	cah-1
WBGene00000280	55.1525	0.355009	0.188326	1.88507	0.05942	0.325525	cah-2
WBGene00000281	999.976	0.178323	0.135669	1.3144	0.188711	0.532087	cah-3
WBGene00000282	3582.24	0.0789721	0.0843824	0.935884	0.349333	0.680953	cah-4
WBGene00000283	977.026	0.0789362	0.0813749	0.970031	0.332031	0.665898	cah-5
WBGene00000284	154.869	0.178882	0.115346	1.55083	0.120942	0.444254	cah-6
WBGene00000285	276.193	0.224389	0.124523	1.80199	0.0715473	0.35088	cal-1
WBGene00000286	216.39	0.224416	0.122915	1.82578	0.067884	0.342478	cal-2
WBGene00000287	29.3976	0.615784	0.295473	2.08406	0.0371544	0.261296	cal-3
WBGene00000288	143.356	0.295872	0.114283	2.58895	0.00962703	0.130796	cal-4
WBGene00000289	1125.8	0.0872517	0.0933879	0.934294	0.350152	0.681833	cam-1
WBGene00000292	2377.97	0.0515729	0.0434374	1.18729	0.235112	0.584357	cap-1
WBGene00000293	3241.54	0.0207605	0.0452957	0.458332	0.646714	0.860978	cap-2
WBGene00000294	3013.53	-0.0338601	0.0803287	-0.421519	0.673376	0.874084	cas-1
WBGene00000295	73.8111	0.417961	0.166794	2.50585	0.0122157	0.149309	cat-1
WBGene00000296	50.3308	0.151489	0.211712	0.715545	0.474272	0.768611	cat-2
WBGene00000298	1346.85	0.0851061	0.144975	0.58704	0.557177	0.817585	cat-4
WBGene00000301	25.6469	-0.163989	0.379042	-0.432641	0.665276	0.870273	cav-1
WBGene00000302	130.928	-0.311421	0.171419	-1.81672	0.0692596	0.345966	cav-2
WBGene00000366	4890.49	-0.0507388	0.0677359	-0.749067	0.453817	0.757305	cbp-1
WBGene00000367	493.317	0.315648	0.14319	2.20439	0.0274966	0.224549	cca-1
WBGene00000368	486.544	0.109796	0.104209	1.05361	0.29206	0.634387	ccb-1
WBGene00000369	1272.16	-0.0547995	0.0822946	-0.665894	0.505479	0.78758	ccf-1
WBGene00000370	2711.45	0.182923	0.0756916	2.41668	0.0156626	0.170114	ccg-1
WBGene00000371	9265.88	0.011414	0.113777	0.100319	0.920091	0.971139	cco-1
WBGene00000372	0.811187	-0.779298	1.78765	-0.435935	0.662884	NA	cyp-13A7
WBGene00000373	348.028	0.433944	0.253373	1.71267	0.0867732	0.38606	cyp-14A5
WBGene00000374	352.39	0.420506	0.130416	3.22435	0.00126259	0.0364357	cyp-31A1
WBGene00000375	522.738	-0.0280212	0.0925528	-0.302759	0.762074	0.91596	cyp-44A1
WBGene00000376	5524.6	-0.0294588	0.0497636	-0.591976	0.553867	0.815819	ccr-4
WBGene00000377	8482.88	-0.147408	0.0797898	-1.84746	0.0646807	0.336414	cct-1
WBGene00000378	7564.01	-0.0972288	0.0847251	-1.14758	0.251143	0.597215	cct-2
WBGene00000379	8544.21	-0.128273	0.0689563	-1.8602	0.0628569	0.333133	cct-4
WBGene00000380	15905.1	-0.0136063	0.089725	-0.151644	0.879468	0.957209	cct-5
WBGene00000381	8571.75	-0.155671	0.0784712	-1.98379	0.0472788	0.2942	cct-6
WBGene00000382	1152.86	-0.118919	0.0808149	-1.4715	0.141155	0.471082	cdc-6
WBGene00000383	1820.19	-0.156752	0.0654678	-2.39434	0.0166502	0.175485	cdc-14
WBGene00000386	2313.45	-0.199288	0.0802654	-2.48286	0.0130333	0.153444	cdc-25.1
WBGene00000387	209.728	0.0128401	0.112908	0.113721	0.909459	0.967075	cdc-25.2
WBGene00000388	105.202	-0.370877	0.347753	-1.06649	0.2862	0.62861	cdc-25.3
WBGene00000389	143.454	-0.12005	0.212277	-0.565534	0.571711	0.825208	cdc-25.4
WBGene00000390	4139.14	-0.0994152	0.0642497	-1.54732	0.121785	0.445214	cdc-42
WBGene00000391	439.826	0.0471594	0.131368	0.358986	0.719606	0.89725	cdd-1
WBGene00000392	582.003	-0.20485	0.134008	-1.52864	0.126353	0.449839	cdd-2
WBGene00000393	1023.13	-0.0134543	0.0654514	-0.205562	0.837133	0.942022	cdf-1
WBGene00000395	249.111	0.320612	0.205125	1.56301	0.118051	0.438948	cdh-3
WBGene00000396	857.535	0.182192	0.181538	1.00361	0.315569	0.651845	cdh-4
WBGene00000397	488.158	0.570694	0.522342	1.09257	0.274584	0.617573	cdh-5
WBGene00000399	205.523	2.57659	1.01102	2.54851	0.0108186	0.138505	cdh-7
WBGene00000401	207.739	0.132434	0.278142	0.476137	0.633977	0.854069	cdh-9
WBGene00000402	532.247	2.20629	0.91718	2.40552	0.0161497	0.172387	cdh-10
WBGene00000403	1813.03	0.259776	0.0646272	4.01961	5.82955e-05	0.00403775	casy-1
WBGene00000405	2028.49	-0.100037	0.0938385	-1.06605	0.2864	0.628711	cdk-1
WBGene00000406	72.4282	0.0266045	0.176133	0.151048	0.879938	0.95738	cdk-4
WBGene00000407	653.833	-0.0385616	0.101143	-0.381257	0.703012	0.888811	cdk-5
WBGene00000408	850.197	-0.0353201	0.0838901	-0.421028	0.673735	0.874142	cdk-7
WBGene00000409	710.836	-0.0590765	0.0694686	-0.850406	0.395099	0.715246	cdk-8
WBGene00000410	694.251	-0.0617954	0.0611046	-1.01131	0.31187	0.649346	cdk-9
WBGene00000411	2001.02	-0.140796	0.0720404	-1.95441	0.0506533	0.30454	cdl-1
WBGene00000412	52.6608	-0.061951	0.233317	-0.265522	0.790607	0.927094	cdr-1
WBGene00000413	558.766	-0.138754	0.101481	-1.36729	0.171535	0.51014	cdt-1
WBGene00000414	812.85	0.0578124	0.0816538	0.708019	0.478933	0.77151	cec-1
WBGene00000415	1678.88	-0.0452818	0.132987	-0.340498	0.733481	0.90233	ced-1
WBGene00000416	679.101	-0.0785036	0.124493	-0.630589	0.52831	0.801812	ced-2
WBGene00000417	1527.72	-0.0867377	0.160279	-0.541167	0.588392	0.832941	ced-3
WBGene00000418	581.699	-0.145514	0.0702031	-2.07276	0.0381948	0.264537	ced-4
WBGene00000419	1813.63	0.00225792	0.104324	0.0216433	0.982733	0.993415	ced-5
WBGene00000420	742.69	-0.123984	0.113204	-1.09522	0.27342	0.616461	ced-6
WBGene00000421	4656.16	0.0125912	0.0806616	0.156099	0.875955	0.956786	ced-7
WBGene00000422	20.0582	0.779665	0.421822	1.84833	0.0645548	0.336414	ced-8
WBGene00000423	718.227	-0.188567	0.134927	-1.39755	0.162248	0.498084	ced-9
WBGene00000424	1096.54	0.0183999	0.0772837	0.238083	0.811817	0.934169	ced-10
WBGene00000425	232.939	0.2945	0.267596	1.10054	0.271098	0.614253	ced-11
WBGene00000426	1140.89	-0.031756	0.103217	-0.307662	0.758339	0.914171	ced-12
WBGene00000427	0.166681	-0.189125	3.81698	-0.0495484	0.960482	NA	ced-13
WBGene00000428	10.7613	0.472718	0.400348	1.18077	0.237695	0.586642	ceh-1
WBGene00000429	15.8835	0.15133	0.378837	0.39946	0.689554	0.881879	ceh-2
WBGene00000430	48.3568	-0.0691676	0.234239	-0.295287	0.767775	0.917393	ceh-5
WBGene00000431	44.1652	0.133809	0.232007	0.576747	0.56411	0.821616	ceh-6
WBGene00000432	0.72755	-1.10441	1.51118	-0.730827	0.464885	NA	ceh-7
WBGene00000433	2.65266	1.47724	0.938844	1.57347	0.115611	NA	ceh-8
WBGene00000434	6.11312	-0.270922	0.666551	-0.406454	0.684409	0.879638	ceh-9
WBGene00000435	9.39896	0.322099	0.42345	0.760654	0.446864	0.751939	ceh-10
WBGene00000436	3.76002	0.78052	0.942325	0.828292	0.407505	0.723839	ceh-12
WBGene00000437	159.125	0.00158995	0.163886	0.00970157	0.992259	0.99722	ceh-13
WBGene00000438	202.154	-0.111339	0.127987	-0.869922	0.384343	0.707048	ceh-14
WBGene00000439	3.51092	0.271998	0.669268	0.406412	0.68444	NA	ceh-16
WBGene00000440	4.51004	0.270891	0.694367	0.390126	0.696443	0.885225	ceh-17
WBGene00000441	983.499	-0.0174003	0.051728	-0.336381	0.736584	0.903663	ceh-18
WBGene00000442	21.7847	-0.259712	0.343925	-0.755143	0.450163	0.754144	ceh-19
WBGene00000443	403.481	0.25802	0.0965345	2.67283	0.00752144	0.114583	ceh-20
WBGene00000444	87.5023	0.564949	0.183685	3.07563	0.00210056	0.0519966	ceh-21
WBGene00000445	34.4242	-0.188975	0.23199	-0.814581	0.415312	0.729991	ceh-22
WBGene00000446	25.777	0.119355	0.299217	0.398889	0.689975	0.881949	ceh-23
WBGene00000447	25.0617	0.299921	0.256585	1.1689	0.242446	0.590937	ceh-24
WBGene00000448	115.09	0.119045	0.14075	0.845793	0.397668	0.717296	pros-1
WBGene00000449	39.6801	-0.106474	0.218992	-0.486197	0.626827	0.851142	ceh-27
WBGene00000450	0	NA	NA	NA	NA	NA	ceh-28
WBGene00000451	18.2073	-0.0635913	0.30647	-0.207496	0.835623	0.94201	ceh-30
WBGene00000452	18.0847	0.04708	0.337253	0.139598	0.888977	0.959828	ceh-31
WBGene00000453	224.217	0.282791	0.108449	2.6076	0.00911801	0.12656	ceh-32
WBGene00000454	17.2941	0.0846321	0.356278	0.237545	0.812234	0.934251	ceh-33
WBGene00000455	70.3247	0.136615	0.167167	0.817235	0.413794	0.728397	ceh-34
WBGene00000457	2.03144	0.0249642	1.01343	0.0246334	0.980347	NA	ceh-36
WBGene00000458	279.233	-0.0464055	0.132891	-0.349201	0.726938	0.899378	ceh-37
WBGene00000459	1752.93	-0.127428	0.0920772	-1.38393	0.166381	0.503019	ceh-38
WBGene00000460	101.99	0.661012	0.190938	3.46192	0.000536341	0.0201689	ceh-39
WBGene00000461	8.37154	0.871913	0.446527	1.95266	0.0508604	0.304945	ceh-40
WBGene00000462	63.6065	0.636161	0.196815	3.23229	0.00122804	0.0359052	ceh-41
WBGene00000463	53.0899	0.17001	0.211922	0.802229	0.42242	0.735619	ceh-43
WBGene00000464	1971.43	0.0655041	0.055154	1.18766	0.234969	0.584357	ceh-44
WBGene00000465	7667.44	-0.182536	0.258792	-0.705339	0.480599	0.772999	cpg-1
WBGene00000466	1034.44	-0.0420395	0.0650105	-0.646656	0.517855	0.795569	cel-1
WBGene00000467	846.947	-0.186245	0.113009	-1.64806	0.0993402	0.407923	cep-1
WBGene00000468	0.841305	-1.66352	1.81564	-0.916217	0.359553	NA	ces-1
WBGene00000469	1.45556	1.27956	1.19434	1.07136	0.28401	NA	ces-2
WBGene00000472	9445.31	0.0456701	0.0594271	0.768505	0.442187	0.748524	cey-1
WBGene00000473	18552.9	-0.396465	0.170881	-2.32013	0.020334	0.192469	cey-2
WBGene00000474	8304.71	-0.26974	0.139467	-1.93408	0.0531038	0.310922	cey-3
WBGene00000475	11016	0.00799465	0.0736347	0.108572	0.913542	0.968548	cey-4
WBGene00000476	116.499	0.0995687	0.145154	0.685954	0.492742	0.78096	cfi-1
WBGene00000477	206.732	0.0280917	0.103369	0.27176	0.785806	0.925198	cft-1
WBGene00000478	61.7476	-0.0619535	0.224201	-0.27633	0.782295	0.923564	cfz-2
WBGene00000479	29234.1	-0.428793	0.135101	-3.17388	0.00150415	0.041176	cgh-1
WBGene00000480	2780.68	-0.0738156	0.0817923	-0.902476	0.366804	0.693777	cgp-1
WBGene00000481	113.411	0.107729	0.154856	0.695671	0.486635	0.776865	cha-1
WBGene00000482	1086.21	0.503352	0.142682	3.5278	0.000419035	0.0169689	chd-3
WBGene00000483	0.518471	-0.611141	1.91947	-0.318391	0.750189	NA	che-1
WBGene00000484	45.2365	0.201869	0.243256	0.829861	0.406617	0.723168	che-2
WBGene00000485	119.518	0.625473	0.176516	3.54342	0.000394968	0.016311	che-3
WBGene00000487	3.35718	0.706547	0.737908	0.9575	0.338315	NA	che-6
WBGene00000488	44.78	0.144932	0.221342	0.654785	0.512606	0.791882	che-7
WBGene00000490	52.8786	0.25293	0.213054	1.18716	0.235163	0.584357	che-11
WBGene00000491	60.803	0.0722896	0.228234	0.316735	0.751445	0.911637	che-12
WBGene00000492	55.2009	0.194542	0.192428	1.01098	0.312024	0.649346	che-13
WBGene00000493	297.544	0.439113	0.520646	0.843401	0.399004	0.718397	che-14
WBGene00000496	2454.66	-0.193928	0.20661	-0.938616	0.347928	0.679802	chs-1
WBGene00000497	1124.3	0.14335	0.305456	0.4693	0.638855	0.85715	chs-2
WBGene00000498	774.882	-0.08601	0.0887744	-0.968861	0.332615	0.66619	chk-1
WBGene00000499	312.109	-0.0520339	0.113492	-0.458479	0.646608	0.860975	chk-2
WBGene00000500	769.235	-0.1009	0.0921527	-1.09492	0.273551	0.616567	chn-1
WBGene00000501	101.553	0.0944642	0.138958	0.679803	0.496629	0.782921	cho-1
WBGene00000502	1386.33	-0.0378341	0.0923734	-0.409578	0.682116	0.879204	chp-1
WBGene00000503	80.1192	0.453056	0.504592	0.897866	0.369257	0.696141	cht-1
WBGene00000506	282.881	-0.0180663	0.0883035	-0.204593	0.83789	0.942416	cic-1
WBGene00000507	685.264	0.038211	0.0850892	0.44907	0.653381	0.864235	cit-1.1
WBGene00000508	1110.15	-0.096516	0.0877674	-1.09968	0.271472	0.614513	cit-1.2
WBGene00000509	1137.34	-0.108959	0.135729	-0.802771	0.422107	0.735425	cka-1
WBGene00000510	253.655	0.26672	0.107126	2.48977	0.0127824	0.151465	cka-2
WBGene00000511	154.489	0.276885	0.126966	2.18077	0.0292003	0.230994	ckb-1
WBGene00000512	2049.31	0.582211	0.501989	1.15981	0.246127	0.593791	ckb-2
WBGene00000513	3.20437	0.591088	0.874708	0.675755	0.499196	NA	ckb-3
WBGene00000514	345.704	-0.0295443	0.164023	-0.180123	0.857056	0.949477	ckb-4
WBGene00000515	687.164	0.0802178	0.118322	0.67796	0.497797	0.78374	ckc-1
WBGene00000516	355.957	-0.173147	0.103996	-1.66494	0.0959256	0.40138	cki-1
WBGene00000517	882.195	-0.236522	0.0898084	-2.63363	0.00844775	0.121313	cki-2
WBGene00000518	115.347	0.0090292	0.160509	0.0562535	0.95514	0.983676	ckk-1
WBGene00000519	930.078	-0.0552986	0.0556907	-0.992959	0.32073	0.655847	cku-70
WBGene00000520	840.236	-0.110406	0.0936453	-1.17898	0.238405	0.587701	cku-80
WBGene00000521	17.4838	1.52474	0.715154	2.13205	0.0330028	0.245046	cky-1
WBGene00000522	1527.03	-0.160114	0.0981782	-1.63085	0.102922	0.41473	clc-1
WBGene00000523	61.1817	0.0961836	0.245956	0.391061	0.695753	0.885088	clc-2
WBGene00000524	127.246	0.276261	0.141482	1.95263	0.0508638	0.304945	clc-3
WBGene00000525	2.79818	-0.897435	1.06266	-0.844514	0.398382	NA	clc-4
WBGene00000526	63.7006	0.136333	0.26278	0.518811	0.603893	0.840803	clc-5
WBGene00000527	1671.44	-0.171644	0.108136	-1.5873	0.112445	0.430303	cle-1
WBGene00000528	2122.59	-0.115934	0.12942	-0.895796	0.370362	0.696141	clh-1
WBGene00000529	117.855	0.295987	0.126983	2.33091	0.0197581	0.190326	clh-2
WBGene00000530	678.376	0.170702	0.0920344	1.85476	0.0636299	0.334152	clh-3
WBGene00000531	177.052	0.0425677	0.120873	0.352168	0.724713	0.898863	clh-4
WBGene00000532	1825.01	-0.0153739	0.0490611	-0.313362	0.754005	0.912561	clh-5
WBGene00000533	914.4	-0.0202576	0.0792508	-0.255614	0.798249	0.929159	clh-6
WBGene00000534	3599.7	0.00131808	0.0748985	0.0175982	0.985959	0.994803	cpi-2
WBGene00000535	1806.46	-0.0350489	0.117317	-0.298754	0.765128	0.917186	cpi-1
WBGene00000536	649.479	0.0990863	0.075648	1.30983	0.190252	0.533383	clk-1
WBGene00000537	677.535	-0.149662	0.0963697	-1.553	0.120423	0.44356	clk-2
WBGene00000539	170.653	-0.254067	0.116512	-2.1806	0.029213	0.230994	cln-3.1
WBGene00000540	266.655	0.114802	0.102195	1.12336	0.261287	0.606051	cln-3.2
WBGene00000541	99.2776	0.0727021	0.208288	0.349047	0.727054	0.899378	cln-3.3
WBGene00000542	7326.86	-0.0217625	0.109729	-0.198329	0.842788	0.944185	clp-1
WBGene00000543	772.045	-0.000758676	0.074805	-0.010142	0.991908	0.996987	clp-2
WBGene00000544	240.283	-0.204266	0.127502	-1.60205	0.109144	0.42568	clp-3
WBGene00000545	871.999	0.250319	0.0980668	2.55254	0.0106942	0.137813	clp-4
WBGene00000546	637.179	-0.210457	0.132393	-1.58963	0.111918	0.429496	clp-6
WBGene00000547	1746.79	0.135608	0.0997556	1.35941	0.174018	0.513224	clp-7
WBGene00000548	1971.94	-0.00361342	0.0672256	-0.0537507	0.957134	0.984636	clr-1
WBGene00000549	1813.54	-0.102005	0.0532913	-1.9141	0.0556079	0.316103	cls-2
WBGene00000550	6953.89	-0.146935	0.0604588	-2.43033	0.0150852	0.166236	clu-1
WBGene00000551	4.05881	1.14724	0.901424	1.27269	0.203127	0.550157	clx-1
WBGene00000552	10303.3	-0.0451624	0.0863376	-0.52309	0.600911	0.839525	cmd-1
WBGene00000553	135.346	0.326476	0.166988	1.95509	0.0505729	0.304362	cmk-1
WBGene00000554	1289.4	0.0495355	0.0589823	0.839838	0.400999	0.719926	cnb-1
WBGene00000555	0.254358	-0.189126	3.52975	-0.0535805	0.957269	NA	cnc-1
WBGene00000556	148.182	0.92535	0.455569	2.0312	0.042235	0.278997	cnc-2
WBGene00000557	200.042	1.39054	0.785023	1.77133	0.0765057	0.363868	cnc-3
WBGene00000558	726.973	-0.421354	0.518143	-0.8132	0.416103	0.730669	cnc-4
WBGene00000559	0.16937	0	3.81698	0	1	NA	cnc-5
WBGene00000560	0.385455	-0.707862	2.18117	-0.324533	0.745535	NA	cnc-6
WBGene00000561	1.65627	0.380683	1.04725	0.363508	0.716225	NA	cnd-1
WBGene00000562	45.7301	0.0161428	0.230402	0.0700637	0.944143	0.978816	cng-1
WBGene00000563	7.74098	-0.153633	0.517384	-0.296941	0.766512	0.917393	cng-3
WBGene00000564	1061.99	-0.0252546	0.0981158	-0.257396	0.796873	0.928812	cnk-1
WBGene00000565	1457.4	0.148406	0.0786561	1.88678	0.0591904	0.32487	cnt-1
WBGene00000566	1787.98	-0.162457	0.0939994	-1.72828	0.0839379	0.379606	cnt-2
WBGene00000567	5319.99	0.100726	0.0658545	1.52952	0.126135	0.449493	cnx-1
WBGene00000583	80.1166	0.260402	0.195509	1.33192	0.182886	0.524431	cof-2
WBGene00000584	115.702	-0.0323647	0.190151	-0.170206	0.864848	0.95308	cog-1
WBGene00000585	1323.69	-0.016211	0.0786334	-0.206159	0.836667	0.942022	cogc-2
WBGene00000591	420.208	0.478381	0.1344	3.55939	0.000371721	0.0156631	coh-1
WBGene00000592	651.469	-0.198168	0.0656261	-3.01965	0.00253067	0.0592087	coh-3
WBGene00000593	2.6575	-0.195524	0.786169	-0.248705	0.803589	NA	col-2
WBGene00000594	35240.4	-0.392602	0.173064	-2.26854	0.0232961	0.206302	col-3
WBGene00000596	10303.5	-0.626964	0.422416	-1.48423	0.137747	0.467024	col-7
WBGene00000597	5313.42	-0.420818	0.585283	-0.718998	0.472142	0.768134	col-8
WBGene00000598	0.876542	-0.492146	1.38253	-0.355974	0.72186	NA	col-9
WBGene00000599	23644.6	-0.537025	0.171233	-3.13622	0.00171142	0.0449959	col-10
WBGene00000601	55209.8	-0.684019	0.173247	-3.94824	7.87268e-05	0.00507134	col-12
WBGene00000602	28169.4	-0.693833	0.2128	-3.26048	0.00111222	0.0338618	col-13
WBGene00000603	29871.3	-0.290909	0.248535	-1.1705	0.241801	0.590495	col-14
WBGene00000606	10973.2	0.117899	0.539563	0.218508	0.827033	0.938999	col-17
WBGene00000608	31026.7	-0.516003	0.312634	-1.6505	0.0988407	0.406928	col-19
WBGene00000609	31819.9	-0.43884	0.315051	-1.39292	0.163645	0.499955	col-20
WBGene00000610	343.002	-0.356039	0.259763	-1.37063	0.17049	0.508308	col-33
WBGene00000611	1599.86	-0.355162	0.26498	-1.34034	0.180136	0.522132	col-34
WBGene00000612	3.47006	0.23339	0.779621	0.299364	0.764663	NA	col-35
WBGene00000613	1.20486	1.03588	1.1596	0.893302	0.371695	NA	col-36
WBGene00000614	0.508979	-1.14759	3.13956	-0.365527	0.714718	NA	col-37
WBGene00000615	32559.9	-0.20226	0.351115	-0.57605	0.564581	0.821687	col-38
WBGene00000616	21508.5	-0.568825	0.311516	-1.82599	0.0678518	0.34242	col-39
WBGene00000617	1.89959	-0.867974	1.1125	-0.780202	0.435272	NA	col-40
WBGene00000618	53.5129	1.73556	0.5521	3.14355	0.00166909	0.0442018	col-41
WBGene00000620	33.8819	-0.0349429	0.295205	-0.118368	0.905776	0.965723	col-43
WBGene00000621	3.22351	0.426675	1.15574	0.36918	0.711994	NA	col-44
WBGene00000622	5.12461	0.108461	0.650552	0.166722	0.867589	0.954515	col-45
WBGene00000623	77.8536	2.18445	0.864184	2.52776	0.0114792	0.143458	col-46
WBGene00000624	24.2846	2.30909	0.872381	2.64688	0.0081239	0.118894	col-47
WBGene00000625	10234.2	-0.0531283	0.355613	-0.149399	0.881239	0.95757	col-48
WBGene00000626	21822.9	-0.311589	0.326502	-0.954325	0.339919	0.673141	col-49
WBGene00000627	0.675798	0.133166	1.61805	0.0823006	0.934408	NA	col-50
WBGene00000628	1.90157	1.12197	1.01946	1.10055	0.271093	NA	col-51
WBGene00000629	1.8684	0.677806	1.04594	0.648033	0.516964	NA	col-52
WBGene00000630	43.2066	-0.106011	0.238106	-0.445224	0.656158	0.865349	col-53
WBGene00000631	184.01	0.037804	0.243793	0.155066	0.876769	0.956805	col-54
WBGene00000632	0.214634	1.82989	3.77242	0.48507	0.627627	NA	col-55
WBGene00000633	7.38412	0.26223	0.641435	0.408818	0.682673	0.87923	col-56
WBGene00000634	1661.53	-0.458795	0.204459	-2.24395	0.0248358	0.213354	col-58
WBGene00000636	18180.2	-0.479481	0.103278	-4.6426	3.44054e-06	0.000462919	col-60
WBGene00000637	213.276	-0.574973	0.156032	-3.68498	0.000228722	0.0113108	col-61
WBGene00000638	11309	-0.622941	0.406006	-1.53432	0.124952	0.448549	col-62
WBGene00000639	26797.9	-0.182663	0.472246	-0.386797	0.698906	0.886327	col-63
WBGene00000640	21.2362	0.493803	0.335453	1.47205	0.141007	0.471082	col-64
WBGene00000641	6772.85	-0.574979	0.166444	-3.45449	0.000551329	0.0205321	col-65
WBGene00000642	1.24966	-1.27635	1.55234	-0.822214	0.410955	NA	col-66
WBGene00000644	410.965	-0.0394654	0.159261	-0.247802	0.804287	0.930938	col-68
WBGene00000645	200.824	-0.407239	0.193988	-2.0993	0.03579	0.255398	col-69
WBGene00000646	616.301	0.0822394	0.202006	0.407114	0.683924	0.879638	H17B01.2
WBGene00000647	39383.7	-0.0485734	0.306331	-0.158565	0.874012	0.956511	col-71
WBGene00000648	1.58575	-0.75951	1.29366	-0.587102	0.557135	NA	col-72
WBGene00000649	57255.4	-0.19591	0.401239	-0.488263	0.625364	0.850332	col-73
WBGene00000650	8.92156	-0.410519	0.472698	-0.868459	0.385143	0.707668	col-74
WBGene00000651	22.0015	-0.200123	0.402454	-0.497257	0.619008	0.847217	col-75
WBGene00000652	3027.02	-0.413715	0.128809	-3.21183	0.0013189	0.0374228	col-76
WBGene00000653	50893.8	-0.452505	0.217106	-2.08426	0.0371362	0.261296	col-77
WBGene00000654	0.442461	-1.01321	2.24151	-0.45202	0.651255	NA	col-78
WBGene00000655	1367.27	0.777444	0.689927	1.12685	0.259806	0.605019	col-79
WBGene00000656	17944.6	-0.344608	0.501807	-0.686734	0.49225	0.780779	col-80
WBGene00000657	44309.5	-0.63256	0.304208	-2.07937	0.0375835	0.262471	col-81
WBGene00000658	22.9112	-0.474462	0.302649	-1.5677	0.116951	0.436982	col-83
WBGene00000659	4.08143	-0.520297	0.95834	-0.542915	0.587189	0.832592	col-84
WBGene00000660	5.18438	-0.723325	0.630362	-1.14748	0.251185	0.597231	col-85
WBGene00000661	2.74165	-0.687517	0.887036	-0.775072	0.438297	NA	col-86
WBGene00000662	9.74554	-0.678283	0.434936	-1.5595	0.118878	0.440794	col-87
WBGene00000663	23156.2	-0.570236	0.155484	-3.66748	0.000244951	0.0117436	col-88
WBGene00000664	977.248	-0.565586	0.204795	-2.76171	0.00574988	0.0966072	col-89
WBGene00000665	2922.56	-0.65706	0.164772	-3.98771	6.67155e-05	0.00445233	col-90
WBGene00000666	10900.4	-0.459359	0.174368	-2.63443	0.00842787	0.121313	col-91
WBGene00000667	34873.9	-0.49684	0.197861	-2.51106	0.0120368	0.148318	col-92
WBGene00000668	41648.8	-0.467978	0.242402	-1.93058	0.0535345	0.311855	col-93
WBGene00000669	19077.1	-0.492794	0.193656	-2.54468	0.0109376	0.139489	col-94
WBGene00000670	137.208	0.405388	0.680241	0.595948	0.55121	0.814632	col-95
WBGene00000671	828.183	-0.190355	0.369889	-0.514627	0.606813	0.842009	col-96
WBGene00000672	26836.9	-0.137447	0.295804	-0.464657	0.642177	0.859534	col-97
WBGene00000673	1855.39	0.262862	0.546516	0.480978	0.630532	0.852634	col-98
WBGene00000674	332.807	0.195184	0.254506	0.766913	0.443133	0.749365	col-99
WBGene00000675	1528.75	0.153392	0.659134	0.232718	0.81598	0.93585	col-101
WBGene00000676	0.811361	-0.0373607	1.67926	-0.0222483	0.98225	NA	col-102
WBGene00000677	2180.77	0.079249	0.525167	0.150902	0.880053	0.95738	col-103
WBGene00000678	20547.9	-0.254092	0.263105	-0.965741	0.334174	0.667906	col-104
WBGene00000679	18.2451	0.17678	0.479055	0.369019	0.712114	0.893002	col-105
WBGene00000680	22113.9	-0.348267	0.253305	-1.37489	0.169165	0.506828	col-106
WBGene00000681	11584.4	-0.329507	0.203512	-1.6191	0.105425	0.419988	col-107
WBGene00000682	2.4531	0.462657	1.03842	0.445538	0.655931	NA	col-108
WBGene00000683	11613.7	0.0691671	0.410847	0.168352	0.866306	0.953795	col-109
WBGene00000684	1592.27	0.937156	0.756562	1.2387	0.215455	0.565108	col-110
WBGene00000685	2742.57	-0.144012	0.316327	-0.455262	0.648921	0.862333	col-111
WBGene00000687	3394.12	-0.45015	0.125015	-3.60077	0.000317281	0.0140785	col-113
WBGene00000688	23.4647	-0.510374	0.305379	-1.67128	0.0946666	0.398541	col-114
WBGene00000689	1707.43	-0.438627	0.217695	-2.01487	0.0439183	0.284557	col-115
WBGene00000690	4.61933	-0.0052986	0.733713	-0.00722162	0.994238	0.997829	col-116
WBGene00000691	30922	-0.455725	0.163391	-2.78917	0.00528439	0.0914694	col-117
WBGene00000692	3085.62	-0.497365	0.145787	-3.41158	0.000645871	0.0231967	col-118
WBGene00000693	18474.7	-0.367295	0.510056	-0.720107	0.471459	0.767922	col-119
WBGene00000694	14639.6	-0.45172	0.152007	-2.9717	0.00296154	0.0653285	col-120
WBGene00000695	1.84779	0.691538	1.36242	0.507581	0.611747	NA	col-121
WBGene00000696	36720.6	-0.439811	0.273819	-1.60621	0.108228	0.424864	col-122
WBGene00000697	23.0985	-0.336615	0.556082	-0.605334	0.544957	0.811433	col-123
WBGene00000698	60146.7	-0.544582	0.294397	-1.84982	0.0643391	0.336312	col-124
WBGene00000699	34300.9	-0.422771	0.193739	-2.18217	0.0290971	0.230784	col-125
WBGene00000700	9290.52	-0.162763	0.30019	-0.542201	0.58768	0.832818	col-126
WBGene00000702	106.878	2.26913	1.23204	1.84177	0.0655089	0.337539	col-128
WBGene00000703	57640	-0.555208	0.292972	-1.89509	0.0580806	0.322709	col-129
WBGene00000704	9213.44	-0.484775	0.222794	-2.17589	0.0295633	0.231817	col-130
WBGene00000705	257.643	0.116882	0.362647	0.322302	0.747224	0.90927	col-131
WBGene00000706	2.16204	0.0639159	0.926716	0.0689703	0.945013	NA	col-132
WBGene00000707	35362.6	-0.602948	0.157801	-3.82093	0.000132947	0.00762229	col-133
WBGene00000708	68.3763	0.311482	0.529292	0.588488	0.556205	0.81704	col-135
WBGene00000709	0.164469	-0.189125	3.81698	-0.0495484	0.960482	NA	col-136
WBGene00000710	6733.16	-0.354679	0.240275	-1.47614	0.139907	0.469454	col-137
WBGene00000711	39740.8	-0.25508	0.324814	-0.785311	0.432271	0.742129	col-138
WBGene00000712	46398.5	-0.530504	0.304619	-1.74153	0.0815901	0.375413	col-139
WBGene00000713	34261.6	-0.470873	0.285601	-1.64871	0.0992075	0.407602	col-140
WBGene00000714	186.787	-0.524661	0.253413	-2.07038	0.0384168	0.264744	col-141
WBGene00000715	3948.63	-0.377219	0.538501	-0.700498	0.483616	0.775573	col-142
WBGene00000716	1421.98	-0.0716895	0.681887	-0.105134	0.91627	0.96951	col-143
WBGene00000717	25398.1	-0.559099	0.165646	-3.37525	0.000737475	0.025527	col-144
WBGene00000718	16027.9	-0.442676	0.185597	-2.38515	0.0170721	0.177348	col-145
WBGene00000719	10701.7	-0.584534	0.329754	-1.77264	0.076289	0.363515	col-146
WBGene00000720	8458.81	-0.246717	0.437761	-0.56359	0.573034	0.825874	col-147
WBGene00000721	29.298	0.0302644	0.301039	0.100533	0.919921	0.971032	col-148
WBGene00000722	3493.12	0.162642	0.343106	0.474029	0.635479	0.855115	col-149
WBGene00000723	2397.24	-0.469836	0.207898	-2.25993	0.0238255	0.208554	col-150
WBGene00000724	5.41673	-0.533283	0.672686	-0.792766	0.427914	0.739442	col-151
WBGene00000725	1096.35	-0.686241	0.138573	-4.95219	7.33847e-07	0.000132835	col-152
WBGene00000726	282.229	-0.0812197	0.133686	-0.607542	0.543492	0.810549	col-153
WBGene00000727	13330.5	-0.512671	0.216908	-2.36354	0.0181012	0.182955	col-154
WBGene00000728	17365.1	-0.505132	0.235243	-2.14727	0.0317715	0.240398	col-155
WBGene00000729	6841.34	-0.366017	0.217835	-1.68025	0.0929092	0.396662	col-156
WBGene00000730	9250.59	-0.604496	0.281518	-2.14727	0.0317716	0.240398	col-157
WBGene00000731	7.02662	1.30675	0.666598	1.96033	0.0499568	0.302295	col-158
WBGene00000732	29564.4	-0.510754	0.200888	-2.54248	0.011007	0.139863	col-159
WBGene00000733	30027.9	-0.453133	0.286278	-1.58284	0.113457	0.431286	col-160
WBGene00000734	36879.5	-0.617645	0.156414	-3.94878	7.85495e-05	0.00507134	col-161
WBGene00000735	21939.3	-0.582663	0.14999	-3.88468	0.000102467	0.00630833	col-162
WBGene00000736	3.15007	-0.657546	0.903724	-0.727595	0.466861	NA	col-163
WBGene00000737	0.975771	1.79942	1.52144	1.18271	0.236924	NA	col-164
WBGene00000738	0.504721	1.15544	1.76304	0.655367	0.512232	NA	col-165
WBGene00000739	8774.14	-0.28045	0.168281	-1.66655	0.0956033	0.400804	col-166
WBGene00000740	26406.4	-0.412488	0.148722	-2.77355	0.00554488	0.0944951	col-167
WBGene00000741	11791.7	-0.386457	0.174795	-2.21092	0.0270416	0.222467	col-168
WBGene00000742	3403.33	-0.0962245	0.190892	-0.504077	0.614207	0.84487	col-169
WBGene00000743	6259.06	-0.383779	0.157898	-2.43055	0.0150761	0.166236	col-170
WBGene00000744	1.54136	-0.0471487	1.12966	-0.0417372	0.966708	NA	col-171
WBGene00000745	306.034	0.00049957	0.314589	0.00158801	0.998733	0.999212	col-172
WBGene00000746	1577.22	0.236204	0.430862	0.548212	0.583547	0.831258	col-173
WBGene00000747	794.219	-0.28587	0.241118	-1.1856	0.235781	0.585121	col-174
WBGene00000748	25609.5	-0.211417	0.294922	-0.716856	0.473463	0.768559	col-175
WBGene00000749	311.905	2.70083	0.97249	2.77723	0.00548246	0.0938147	col-176
WBGene00000750	63.605	0.122666	0.207545	0.591034	0.554498	0.815819	col-177
WBGene00000751	29426	-0.492332	0.291655	-1.68806	0.0913992	0.394683	col-178
WBGene00000752	5404.45	-0.27542	0.428116	-0.643331	0.520009	0.796926	col-179
WBGene00000753	12428.2	-0.370231	0.172417	-2.1473	0.0317694	0.240398	col-180
WBGene00000754	45370.3	-0.479306	0.269403	-1.77914	0.0752163	0.360192	col-181
WBGene00000755	1522.53	0.00882676	0.417974	0.021118	0.983152	0.993433	col-182
WBGene00000756	2.73734	-0.89382	0.799057	-1.11859	0.263313	NA	col-183
WBGene00000757	25913.4	-0.422206	0.266856	-1.58215	0.113616	0.431596	col-184
WBGene00000758	0.377691	0.532219	2.6519	0.200693	0.840938	NA	col-185
WBGene00000759	360.159	-0.413015	0.123117	-3.35466	0.000794634	0.0268552	col-186
WBGene00000760	14.9084	-0.0700017	0.406334	-0.172276	0.86322	0.952448	col-187
WBGene00000761	1314.24	-0.0350801	0.0662201	-0.52975	0.596285	0.836596	coq-1
WBGene00000762	578.856	-0.0222843	0.0661117	-0.337071	0.736063	0.903581	coq-2
WBGene00000763	511.82	-0.0403838	0.110158	-0.366598	0.713919	0.893979	coq-3
WBGene00000764	273.177	0.0667777	0.119935	0.556785	0.577674	0.828498	coq-4
WBGene00000765	1012.3	-0.0320283	0.0816513	-0.392256	0.694869	0.884504	coq-5
WBGene00000766	862.387	-0.0277758	0.069796	-0.397958	0.690661	0.882042	coq-6
WBGene00000767	1823.47	-0.028985	0.0555563	-0.521722	0.601864	0.840011	coq-8
WBGene00000768	1098.32	0.0501399	0.0701524	0.714728	0.474777	0.768972	cor-1
WBGene00000770	847.3	-0.133594	0.0674658	-1.98017	0.0476845	0.295311	cpb-1
WBGene00000771	637.218	-0.0371626	0.112067	-0.331611	0.740183	0.905324	cpb-2
WBGene00000772	3241.99	-0.255134	0.0780998	-3.26677	0.00108781	0.0334854	cpb-3
WBGene00000773	1062.8	-0.0590153	0.0895364	-0.659121	0.509818	0.790192	cpf-1
WBGene00000774	834.804	-0.130206	0.0673624	-1.93292	0.0532464	0.310922	cpf-2
WBGene00000775	262.035	0.0274715	0.165222	0.166271	0.867944	0.954571	cpin-1
WBGene00000776	22917.9	0.37811	0.274831	1.37579	0.168887	0.506482	cpl-1
WBGene00000777	4143.54	-0.29842	0.0983208	-3.03516	0.00240407	0.0573812	cpn-1
WBGene00000778	518.561	0.0675279	0.270724	0.249435	0.803025	0.930602	cpn-2
WBGene00000779	10688.1	-0.0100745	0.0817384	-0.123254	0.901906	0.964206	cpn-3
WBGene00000780	1578.73	-0.0464508	0.0853387	-0.544311	0.586228	0.832155	cpn-4
WBGene00000781	1904.92	0.253854	0.14266	1.77943	0.0751691	0.360192	cpr-1
WBGene00000782	1.01889	1.68839	1.52574	1.1066	0.268466	NA	cpr-2
WBGene00000783	1119.51	0.191404	0.183221	1.04466	0.296181	0.638351	cpr-3
WBGene00000784	12351.1	0.2919	0.155795	1.87361	0.0609838	0.328848	cpr-4
WBGene00000785	8874.75	0.487136	0.140874	3.45794	0.000544313	0.0203617	cpr-5
WBGene00000786	24972.6	0.205393	0.231838	0.885932	0.375654	0.699644	cpr-6
WBGene00000787	1239.54	0.0455284	0.0549639	0.828332	0.407483	0.723839	cps-6
WBGene00000788	11865.9	0.194837	0.269143	0.723915	0.469118	0.766133	cpz-1
WBGene00000789	6170.41	0.108085	0.116595	0.927012	0.35392	0.684219	cpz-2
WBGene00000792	505.684	0.224377	0.221113	1.01476	0.310218	0.648094	crb-1
WBGene00000793	723.649	-0.108699	0.0950934	-1.14308	0.253006	0.599766	crh-1
WBGene00000794	1394.89	-0.10326	0.0965633	-1.06935	0.284913	0.626932	crn-1
WBGene00000795	297.713	-0.0221718	0.0967336	-0.229205	0.81871	0.936452	crn-2
WBGene00000796	2195.92	-0.07914	0.0737601	-1.07294	0.283299	0.62562	crn-3
WBGene00000797	151.131	-0.0814722	0.265111	-0.307313	0.758605	0.91436	crn-4
WBGene00000798	415.074	-0.0652064	0.102066	-0.638866	0.52291	0.798623	crn-5
WBGene00000799	358.728	0.440759	0.100602	4.38121	1.18023e-05	0.00121549	crn-6
WBGene00000800	4957.43	0.0743745	0.0451838	1.64604	0.0997547	0.408778	cars-1
WBGene00000801	165.927	1.31801	0.145846	9.03697	1.61073e-19	3.83906e-16	cars-2
WBGene00000802	48972.3	0.140551	0.0971253	1.44712	0.147865	0.481687	crt-1
WBGene00000803	180.27	0.220684	0.150788	1.46354	0.143319	0.474527	csb-1
WBGene00000804	687.996	-0.159167	0.103796	-1.53346	0.125163	0.448635	csc-1
WBGene00000812	1266.8	-0.04509	0.0642581	-0.701701	0.482866	0.774702	csk-1
WBGene00000813	1176.37	-0.091472	0.0606419	-1.5084	0.131453	0.460082	csn-1
WBGene00000814	1936.15	0.0524408	0.0603713	0.868638	0.385045	0.707587	csn-2
WBGene00000815	1280.58	-0.113036	0.0759584	-1.48812	0.136718	0.466367	csn-3
WBGene00000816	1205.43	-0.171313	0.08353	-2.05092	0.0402751	0.271495	csn-4
WBGene00000817	1137.53	0.00395563	0.0809273	0.0488788	0.961016	0.986178	csn-5
WBGene00000818	1154.69	-0.0785456	0.0641732	-1.22396	0.220966	0.571049	csn-6
WBGene00000819	27.6601	1.57449	0.331906	4.74379	2.09761e-06	0.000318151	csp-1
WBGene00000820	169.528	-0.179403	0.265774	-0.675023	0.499661	0.784347	csp-2
WBGene00000821	8.00191	0.520734	0.670152	0.777039	0.437136	0.744845	csp-3
WBGene00000822	7579.98	0.046544	0.0688011	0.676501	0.498722	0.783844	csq-1
WBGene00000829	19782.5	-0.0514576	0.134562	-0.382409	0.702158	0.888091	ctb-1
WBGene00000830	1328.92	0.362296	0.141378	2.56261	0.0103888	0.136157	ctl-1
WBGene00000831	2270.38	0.308567	0.114357	2.69828	0.00696987	0.109188	ctl-2
WBGene00000832	627.309	0.110143	0.149847	0.735033	0.462319	0.762112	ctn-1
WBGene00000833	19150	0.0189791	0.0610436	0.310911	0.755869	0.912842	cts-1
WBGene00000834	2552.95	-0.0638434	0.0905404	-0.705137	0.480725	0.773031	cua-1
WBGene00000835	1673.91	-0.0779505	0.1936	-0.402638	0.687215	0.880403	cuc-1
WBGene00000836	2382.84	-0.0183386	0.0491362	-0.373219	0.708986	0.891509	cul-1
WBGene00000837	3144.78	-0.0891722	0.0703612	-1.26735	0.20503	0.553121	cul-2
WBGene00000838	4261.56	-0.138727	0.0679526	-2.04152	0.0411989	0.274326	cul-3
WBGene00000839	1429.05	-0.0966245	0.0680378	-1.42016	0.155562	0.489761	cul-4
WBGene00000840	1595.63	-0.0412394	0.0723756	-0.569797	0.568815	0.823986	cul-5
WBGene00000841	204.056	-0.0600608	0.164955	-0.364104	0.71578	0.89494	cul-6
WBGene00000843	2427.9	0.0712901	0.11351	0.628052	0.52997	0.803171	cup-2
WBGene00000845	241.08	0.288712	0.119963	2.40668	0.0160982	0.172058	cup-4
WBGene00000846	1021.56	-0.114062	0.112954	-1.00981	0.312584	0.649969	cup-5
WBGene00000851	2.08803	-0.981009	0.987769	-0.993156	0.320634	NA	cut-1
WBGene00000853	63.1732	0.732711	0.517403	1.41613	0.156737	0.491446	cut-6
WBGene00000854	695.936	-0.00566139	0.0846768	-0.0668587	0.946694	0.980206	cux-7
WBGene00000857	251.647	-0.0431872	0.123953	-0.348415	0.727528	0.899517	cwn-1
WBGene00000858	127.564	0.307195	0.214744	1.43051	0.15257	0.488225	cwn-2
WBGene00000859	0.0971116	-0.910468	3.81698	-0.238531	0.81147	NA	cwp-1
WBGene00000860	0.241934	-1.02786	3.59858	-0.285629	0.775162	NA	cwp-2
WBGene00000861	0.32206	-0.910469	3.38269	-0.269156	0.78781	NA	cwp-3
WBGene00000862	21.5043	0.937665	0.303843	3.08602	0.00202856	0.0509705	cwp-4
WBGene00000863	992.19	-0.17362	0.105419	-1.64695	0.0995692	0.408361	cya-1
WBGene00000864	32.0709	0.536339	0.30986	1.73091	0.0834682	0.378832	cya-2
WBGene00000865	5362.84	-0.360174	0.0947093	-3.80295	0.000142984	0.0080052	cyb-1
WBGene00000866	1270.73	-0.215555	0.225755	-0.954818	0.33967	0.672773	cyb-2.1
WBGene00000867	1758.98	-0.218573	0.194605	-1.12316	0.261368	0.606152	cyb-2.2
WBGene00000868	4097.51	-0.212321	0.174482	-1.21687	0.223655	0.574177	cyb-3
WBGene00000869	11085	-0.103509	0.0851063	-1.21623	0.223897	0.574426	cyc-1
WBGene00000870	57.013	0.764595	0.348841	2.19182	0.0283927	0.228843	cyd-1
WBGene00000871	1712.09	-0.184368	0.109355	-1.68595	0.0918051	0.395244	cye-1
WBGene00000872	1397.67	-0.061271	0.0635715	-0.963812	0.33514	0.669012	cyk-1
WBGene00000874	2104.78	-0.0902216	0.0537314	-1.67912	0.0931285	0.396861	cyk-3
WBGene00000875	2783.42	-0.21962	0.0628875	-3.49227	0.00047893	0.0185691	cyk-4
WBGene00000876	1752.86	-0.121426	0.0493421	-2.4609	0.0138589	0.158916	cyl-1
WBGene00000877	3440.11	-0.226191	0.0846504	-2.67205	0.00753883	0.114583	cyn-1
WBGene00000878	1692.32	-0.190748	0.0641294	-2.97442	0.00293543	0.0650395	cyn-2
WBGene00000879	6392.66	-0.0157366	0.0758512	-0.207467	0.835645	0.94201	cyn-3
WBGene00000880	865.931	-0.0333105	0.0774051	-0.430339	0.666949	0.871024	cyn-4
WBGene00000881	12680.2	0.0973529	0.10795	0.901831	0.367147	0.694105	cyn-5
WBGene00000882	1514.86	1.10916	0.316371	3.50589	0.000455086	0.0181209	cyn-6
WBGene00000883	26396.2	-0.138697	0.0716619	-1.93544	0.0529364	0.310299	cyn-7
WBGene00000884	267.446	0.28185	0.165327	1.7048	0.0882318	0.389389	cyn-8
WBGene00000885	577.34	-0.176317	0.0908717	-1.94029	0.0523448	0.309359	cyn-9
WBGene00000886	361.081	-0.163345	0.131042	-1.24651	0.212576	0.561619	cyn-10
WBGene00000887	520.422	-0.114192	0.0666977	-1.71209	0.0868809	0.38621	cyn-11
WBGene00000888	575.87	-0.162304	0.0865859	-1.87448	0.0608637	0.328844	cyn-12
WBGene00000889	1211.66	-0.0396944	0.0514937	-0.77086	0.44079	0.748069	cyn-13
WBGene00000890	778.518	-0.104581	0.085011	-1.23021	0.218619	0.568567	sig-7
WBGene00000891	1232.1	-0.00374025	0.0625499	-0.0597962	0.952318	0.982085	cyn-15
WBGene00000892	675.364	-0.0449761	0.0673229	-0.668066	0.504092	0.786741	cyn-16
WBGene00000893	878.088	0.285008	0.503948	0.565551	0.571699	0.825208	cyn-17
WBGene00000894	4981.41	-0.250379	0.0819864	-3.05392	0.00225876	0.0552568	dab-1
WBGene00000895	168.45	-0.0262486	0.139887	-0.187641	0.851158	0.947283	dac-1
WBGene00000896	2492.72	-0.0395286	0.0870177	-0.45426	0.649642	0.862385	dad-1
WBGene00000897	391.102	0.0217879	0.0890457	0.244683	0.806702	0.931742	daf-1
WBGene00000898	1821.99	0.0193825	0.0844852	0.229419	0.818543	0.936452	daf-2
WBGene00000899	636.593	-0.0221846	0.100409	-0.220943	0.825137	0.938693	daf-3
WBGene00000900	523.288	0.0381965	0.0946083	0.403734	0.686409	0.880198	daf-4
WBGene00000901	1181.6	0.255803	0.106523	2.4014	0.0163325	0.173783	daf-5
WBGene00000902	276.185	0.499216	0.394033	1.26694	0.205177	0.553121	daf-6
WBGene00000903	262.809	0.312689	0.121405	2.57559	0.0100069	0.133671	daf-7
WBGene00000904	315.394	0.185608	0.124192	1.49453	0.135037	0.464098	daf-8
WBGene00000905	71.169	0.0742423	0.16897	0.439381	0.660386	0.867686	daf-9
WBGene00000906	45.2087	0.313826	0.233774	1.34243	0.179456	0.521072	daf-10
WBGene00000907	31.262	0.351324	0.252704	1.39026	0.164451	0.500675	daf-11
WBGene00000908	826.689	0.0512232	0.0866862	0.590904	0.554585	0.815819	daf-12
WBGene00000910	369.39	0.00500395	0.103146	0.0485133	0.961307	0.986178	daf-14
WBGene00000911	3136.11	-0.0040303	0.0466215	-0.0864473	0.931111	0.975487	daf-15
WBGene00000912	3438.11	-0.0297112	0.0977214	-0.30404	0.761097	0.915843	daf-16
WBGene00000913	2997.39	-0.23341	0.177375	-1.31591	0.188203	0.531826	daf-18
WBGene00000914	249.918	0.11273	0.0966986	1.16579	0.2437	0.592264	daf-19
WBGene00000915	67613.7	-0.156747	0.101803	-1.53971	0.12363	0.447241	daf-21
WBGene00000917	519.11	-0.0412907	0.0716856	-0.575997	0.564617	0.821687	daf-25
WBGene00000920	133.244	1.02848	0.154266	6.66694	2.61196e-11	1.55636e-08	daf-28
WBGene00000923	1465.23	-0.114412	0.0978761	-1.16894	0.242426	0.590937	daf-31
WBGene00000928	2435.82	1.80915	0.919341	1.96788	0.0490821	0.299078	dao-2
WBGene00000929	1232.38	0.219297	0.246489	0.889681	0.373637	0.698148	dao-3
WBGene00000930	1975.97	0.629694	0.60473	1.04128	0.297745	0.639099	dao-4
WBGene00000931	9932.44	-0.126815	0.0756837	-1.67559	0.0938192	0.397582	dao-5
WBGene00000932	137.191	-0.52065	0.21549	-2.41612	0.0156868	0.170114	dao-6
WBGene00000933	1496.66	0.0940775	0.0588639	1.59822	0.109994	0.42613	dap-3
WBGene00000934	104.703	0.241543	0.150916	1.60052	0.109484	0.425687	dat-1
WBGene00000935	3308.68	-0.316387	0.0890393	-3.55334	0.000380367	0.0158256	daz-1
WBGene00000936	288.073	0.0185701	0.091842	0.202196	0.839763	0.942855	dbl-1
WBGene00000937	600.432	-0.0656757	0.0878424	-0.747654	0.454669	0.758039	dbr-1
WBGene00000938	2233.81	-0.0432917	0.0581008	-0.745114	0.456203	0.758704	dcp-66
WBGene00000939	2866.87	0.0231037	0.0555249	0.416096	0.67734	0.876583	dcr-1
WBGene00000940	672.256	-0.0588864	0.0901006	-0.653563	0.513393	0.792584	dcs-1
WBGene00000941	1243.74	-0.0694324	0.0938417	-0.739888	0.459368	0.760629	ddp-1
WBGene00000942	6300.42	-0.0671355	0.135301	-0.496194	0.619757	0.847613	deb-1
WBGene00000950	175.316	0.0277238	0.155355	0.178455	0.858366	0.95012	deg-1
WBGene00000951	153.217	0.0841857	0.113301	0.743025	0.457467	0.759138	deg-3
WBGene00000952	39.6922	0.398401	0.220038	1.8106	0.070203	0.348421	del-1
WBGene00000953	36.5979	0.430858	0.218543	1.9715	0.0486665	0.29819	del-2
WBGene00000955	207.486	0.0465647	0.120474	0.386513	0.699117	0.886327	des-2
WBGene00000958	383.133	0.303931	0.0758219	4.00849	6.1109e-05	0.00417769	dgk-1
WBGene00000959	1178.57	0.088502	0.0987964	0.895801	0.370359	0.696141	dgk-2
WBGene00000960	19.3478	0.0256201	0.307069	0.0834343	0.933506	0.97671	dgk-3
WBGene00000961	1559.89	0.133359	0.0753564	1.7697	0.0767764	0.36442	dgn-1
WBGene00000962	13250.9	0.0451785	0.0885149	0.510405	0.609768	0.84303	dhc-1
WBGene00000963	452.44	0.218497	0.115067	1.89886	0.0575827	0.321602	dhp-1
WBGene00000964	508.631	0.197395	0.141346	1.39653	0.162554	0.498459	dhp-2
WBGene00000965	874.347	-0.0467786	0.0802704	-0.582763	0.560053	0.818896	dhs-1
WBGene00000966	502.648	0.0224987	0.0763097	0.294834	0.76812	0.917532	dhs-2
WBGene00000967	4214.28	0.0141325	0.0982563	0.143833	0.885633	0.9593	dhs-3
WBGene00000968	63.5613	0.372478	0.16556	2.24981	0.0244613	0.211348	dhs-4
WBGene00000969	295.19	0.319085	0.133856	2.38379	0.0171352	0.177348	dhs-5
WBGene00000970	1756.26	-0.0262832	0.0740104	-0.355129	0.722493	0.897868	dhs-6
WBGene00000971	420.935	0.119455	0.198214	0.602656	0.546738	0.812484	dhs-7
WBGene00000972	6.87426	-0.245485	0.576161	-0.426071	0.670056	0.872576	dhs-8
WBGene00000973	844.745	0.0254295	0.167613	0.151715	0.879412	0.957209	dhs-9
WBGene00000974	432.543	-0.188164	0.0976339	-1.92724	0.0539499	0.312179	dhs-11
WBGene00000975	984.26	0.00732563	0.0892855	0.0820473	0.934609	0.976951	dhs-12
WBGene00000976	1528.12	0.076412	0.0646536	1.18187	0.237258	0.586341	dhs-13
WBGene00000977	641.302	-0.214212	0.0683262	-3.13513	0.00171776	0.0450614	dhs-14
WBGene00000978	25.1354	-0.0125751	0.431575	-0.0291377	0.976755	0.991674	dhs-15
WBGene00000979	54.8193	0.717186	0.591444	1.2126	0.225283	0.576121	dhs-16
WBGene00000980	120.948	0.0249982	0.184939	0.13517	0.892477	0.960775	dhs-17
WBGene00000981	442.931	0.0315313	0.115452	0.27311	0.784768	0.924742	dhs-18
WBGene00000982	790.597	-0.0153477	0.193444	-0.0793391	0.936763	0.977787	dhs-19
WBGene00000983	405.278	0.103216	0.136578	0.755724	0.449814	0.753891	dhs-20
WBGene00000984	2697.51	0.0332106	0.172825	0.192163	0.847615	0.945695	dhs-21
WBGene00000985	1983.3	-0.0871452	0.0810905	-1.07467	0.282525	0.625114	dhs-22
WBGene00000986	49.7037	-0.939112	0.298684	-3.14417	0.00166561	0.0442002	dhs-23
WBGene00000987	1399.87	-0.0548333	0.0511792	-1.0714	0.28399	0.626364	dhs-24
WBGene00000988	757.284	-0.00785232	0.101932	-0.0770351	0.938596	0.977922	dhs-25
WBGene00000989	21.8337	-0.353792	0.358257	-0.987536	0.32338	0.658682	dhs-26
WBGene00000990	133.541	0.455659	0.210135	2.16841	0.0301272	0.233937	dhs-27
WBGene00000991	5236.25	-0.0375746	0.103036	-0.364675	0.715354	0.894861	dhs-28
WBGene00000992	279.141	0.577675	0.215965	2.67485	0.00747625	0.11454	dhs-29
WBGene00000993	686.162	-0.174927	0.0680926	-2.56896	0.0102005	0.135174	dhs-30
WBGene00000994	761.245	-0.0256706	0.0688635	-0.372775	0.709316	0.89164	dic-1
WBGene00000995	626.136	0.0991446	0.208081	0.476471	0.633739	0.853925	die-1
WBGene00000996	2031.39	-0.0598155	0.112136	-0.533419	0.593744	0.835317	dif-1
WBGene00000998	5120.64	0.113396	0.131926	0.85954	0.390043	0.712133	dig-1
WBGene00001000	17469.1	-0.115465	0.057369	-2.01266	0.0441501	0.285059	dim-1
WBGene00001001	2476.96	-0.0877237	0.049563	-1.76994	0.0767364	0.36442	dis-3
WBGene00001002	999.967	-0.084911	0.0765351	-1.10944	0.267241	0.61141	div-1
WBGene00001005	7544.22	-0.116385	0.0623125	-1.86775	0.0617962	0.330795	dlc-1
WBGene00001006	3027.06	0.158769	0.195167	0.813504	0.415929	0.730613	dlg-1
WBGene00001007	1688.17	0.00921874	0.0621671	0.14829	0.882114	0.958088	dli-1
WBGene00001008	1484.12	0.200245	0.1053	1.90166	0.0572151	0.320671	dlk-1
WBGene00001016	1182.16	-0.0502564	0.0659845	-0.761639	0.446275	0.751529	dna-2
WBGene00001017	3256.08	0.0208413	0.0611627	0.340752	0.733291	0.902295	dnc-1
WBGene00001018	1167.98	0.0180604	0.0610218	0.295966	0.767256	0.917393	dnc-2
WBGene00001019	1706.7	-0.110443	0.0714908	-1.54486	0.12238	0.445417	dnj-1
WBGene00001020	1120.52	0.0946002	0.128197	0.737927	0.460559	0.761066	dnj-2
WBGene00001021	155.218	-0.0183083	0.117427	-0.155913	0.876102	0.956786	dnj-3
WBGene00001022	328.534	0.113795	0.10184	1.11739	0.263827	0.608062	dnj-4
WBGene00001023	4669.16	-0.116548	0.0971277	-1.19995	0.23016	0.58085	dnj-5
WBGene00001025	2206.08	0.277638	0.148416	1.87068	0.06139	0.329865	dnj-7
WBGene00001026	1552.77	0.0597012	0.0717348	0.832249	0.405268	0.722459	dnj-8
WBGene00001027	1115.38	-0.0396673	0.0635209	-0.624477	0.532315	0.804815	dnj-9
WBGene00001028	1354.56	0.0343939	0.0687949	0.499948	0.617112	0.846423	dnj-10
WBGene00001029	3346.21	-0.105727	0.0744599	-1.41991	0.155633	0.489761	dnj-11
WBGene00001030	6114.47	-0.0799644	0.100435	-0.796184	0.425925	0.738069	dnj-12
WBGene00001031	3646.53	-0.308067	0.115644	-2.66393	0.00772339	0.115508	dnj-13
WBGene00001032	670.675	0.140617	0.0678807	2.07153	0.0383095	0.264537	dnj-14
WBGene00001033	397.245	-0.00622405	0.0787029	-0.0790828	0.936967	0.977922	dnj-15
WBGene00001034	1178.36	-0.147724	0.0630015	-2.34478	0.0190385	0.187632	dnj-16
WBGene00001035	859.935	-0.119894	0.077477	-1.54748	0.121748	0.445214	dnj-17
WBGene00001036	325.019	-0.209304	0.10268	-2.03841	0.0415088	0.2758	dnj-18
WBGene00001037	6633.16	-0.0775087	0.0796797	-0.972753	0.330676	0.665381	dnj-19
WBGene00001038	9627.03	-0.113847	0.0917559	-1.24076	0.214693	0.564529	dnj-20
WBGene00001039	377.824	-0.0778994	0.0949164	-0.820716	0.411808	0.727434	dnj-21
WBGene00001040	954.438	-0.0236185	0.118454	-0.199389	0.841958	0.943654	dnj-22
WBGene00001041	844.673	-0.107158	0.0937846	-1.1426	0.253206	0.599935	dnj-23
WBGene00001042	929.197	-0.0997065	0.0627568	-1.58878	0.112111	0.42999	dnj-24
WBGene00001043	1814.5	-0.110113	0.0714202	-1.54176	0.123133	0.446657	dnj-25
WBGene00001044	243.363	-0.406638	0.162043	-2.50944	0.0120923	0.148453	dnj-26
WBGene00001045	724.155	0.618465	0.257943	2.39768	0.0164993	0.174737	dnj-27
WBGene00001046	612.179	-0.0757889	0.0820382	-0.923825	0.355578	0.685397	dnj-28
WBGene00001047	6088.67	0.115185	0.0723742	1.59153	0.111491	0.428797	dnj-29
WBGene00001048	617.741	-0.111153	0.0845834	-1.31412	0.188806	0.532087	dnj-30
WBGene00001049	959.014	-0.0617155	0.0631703	-0.97697	0.328584	0.663551	dog-1
WBGene00001050	411.7	0.00617094	0.0882882	0.0698953	0.944277	0.978833	dom-3
WBGene00001051	1274.16	-0.271739	0.145462	-1.86811	0.0617474	0.330735	cks-1
WBGene00001052	82.5067	-0.0396969	0.152434	-0.260421	0.794539	0.928564	dop-1
WBGene00001053	174.904	0.0348496	0.134424	0.259252	0.795441	0.928564	dop-2
WBGene00001054	473.316	-0.064986	0.149119	-0.4358	0.662982	0.868802	dpf-1
WBGene00001055	980.336	-0.0721164	0.262369	-0.274867	0.783419	0.923903	dpf-2
WBGene00001056	3776.91	-0.0175762	0.0467082	-0.376299	0.706695	0.89044	dpf-3
WBGene00001057	1797.15	0.033741	0.0520704	0.647987	0.516993	0.794832	dpf-4
WBGene00001058	3985.4	-0.0723751	0.0486403	-1.48797	0.13676	0.466367	dpf-5
WBGene00001059	501.372	1.00089	0.603389	1.65878	0.0971592	0.403379	dpf-6
WBGene00001060	762.664	-0.0964428	0.0837225	-1.15193	0.249348	0.595653	dpf-7
WBGene00001061	960.878	-0.110045	0.103663	-1.06156	0.288435	0.630645	dpl-1
WBGene00001062	0.153772	-1.56009	3.80794	-0.409693	0.682031	NA	dpr-1
WBGene00001063	46.7231	0.455802	0.328732	1.38655	0.16558	0.501825	dpy-1
WBGene00001064	591.999	1.86328	1.03518	1.79995	0.0718682	0.351834	dpy-2
WBGene00001065	432.851	1.8785	1.18432	1.58614	0.112707	0.430303	dpy-3
WBGene00001066	29689.4	-0.119397	0.409634	-0.291473	0.77069	0.918584	dpy-4
WBGene00001067	26781.1	-0.193452	0.340555	-0.568048	0.570003	0.824491	dpy-5
WBGene00001068	105.516	2.33911	0.700045	3.34138	0.000833635	0.0275161	dpy-6
WBGene00001069	566.841	1.90424	1.14332	1.66553	0.0958076	0.401218	dpy-7
WBGene00001070	868.539	1.91453	0.983643	1.94637	0.0516102	0.307065	dpy-8
WBGene00001071	649.197	2.1443	1.16248	1.84458	0.0650984	0.337209	dpy-9
WBGene00001072	654.658	1.73052	1.03442	1.67295	0.0943378	0.39806	dpy-10
WBGene00001073	5950.69	0.514812	0.323027	1.59371	0.111	0.427941	dpy-11
WBGene00001074	29568.4	0.000734108	0.35213	0.00208476	0.998337	0.999135	dpy-13
WBGene00001075	4.55924	0.369636	0.621959	0.594309	0.552305	0.815312	dpy-14
WBGene00001076	28.8304	-0.123136	0.281254	-0.437811	0.661523	0.868051	dpy-17
WBGene00001077	8456.26	0.0745014	0.175282	0.425037	0.67081	0.87263	dpy-18
WBGene00001078	114.005	0.68388	0.288671	2.36906	0.0178334	0.181091	dpy-19
WBGene00001079	184.075	0.570332	0.342132	1.66699	0.0955159	0.400801	dpy-20
WBGene00001080	1355.38	-0.177531	0.07723	-2.29874	0.0215199	0.197468	dpy-21
WBGene00001081	2396.28	0.0519797	0.0706284	0.735959	0.461755	0.761938	dpy-22
WBGene00001082	1069.67	0.155698	0.11704	1.3303	0.183418	0.524894	dpy-23
WBGene00001085	2308.21	-0.00903585	0.0478691	-0.188762	0.85028	0.946811	dpy-26
WBGene00001086	1005.59	0.248115	0.153996	1.61118	0.10714	0.422882	dpy-27
WBGene00001087	1434.96	-0.0523505	0.0499567	-1.04792	0.294677	0.636692	dpy-28
WBGene00001088	1756.82	-0.144456	0.103059	-1.40168	0.161011	0.496287	dpy-30
WBGene00001089	1916.94	0.398895	0.213756	1.86613	0.0620238	0.331005	dre-1
WBGene00001090	1074.5	-0.113929	0.0726376	-1.56845	0.116776	0.436639	drh-1
WBGene00001091	2282.49	0.203051	0.12844	1.5809	0.1139	0.431987	drh-2
WBGene00001092	529.704	-0.300327	0.102059	-2.94267	0.00325391	0.0686475	dro-1
WBGene00001093	2229.36	-0.0534152	0.0705879	-0.756719	0.449218	0.753549	drp-1
WBGene00001094	6418.62	-0.0504576	0.0499069	-1.01103	0.312001	0.649346	dars-1
WBGene00001095	622.517	-0.027694	0.0742154	-0.373157	0.709032	0.891509	dars-2
WBGene00001096	7.24259	0.56672	0.514797	1.10086	0.270957	0.614189	dsc-1
WBGene00001099	4507.5	0.279982	0.140911	1.98694	0.0469293	0.293415	dsc-4
WBGene00001101	625.738	0.177373	0.078484	2.25999	0.0238222	0.208554	dsh-1
WBGene00001102	1067.03	-0.226596	0.144693	-1.56605	0.117337	0.43749	dsh-2
WBGene00001103	1.08761	0.543011	1.31883	0.411735	0.680533	NA	dsl-1
WBGene00001104	1.64886	-0.902927	1.01038	-0.893646	0.371511	NA	dsl-2
WBGene00001105	5.30872	-0.100894	0.601442	-0.167754	0.866777	0.954093	dsl-3
WBGene00001106	0.974629	-1.94905	1.88842	-1.03211	0.302022	NA	dsl-4
WBGene00001107	1.66188	1.21151	1.03048	1.17568	0.239722	NA	dsl-5
WBGene00001108	0.581893	-0.198958	1.97765	-0.100603	0.919866	NA	dsl-6
WBGene00001109	118.434	-0.19642	0.183565	-1.07003	0.284605	0.626574	dsl-7
WBGene00001110	623.667	-0.239474	0.130232	-1.83882	0.0659411	0.338511	duo-1
WBGene00001111	7.83669	0.803246	0.511457	1.57051	0.116298	0.435927	duo-2
WBGene00001112	1249.28	-0.00606552	0.0966956	-0.0627279	0.949983	0.981484	duo-3
WBGene00001113	2003.27	0.0560449	0.188688	0.297024	0.766448	0.917393	dur-1
WBGene00001115	139.528	0.118548	0.31733	0.37358	0.708717	0.891509	dyb-1
WBGene00001116	448.089	0.0762831	0.0761661	1.00154	0.316568	0.652885	dyc-1
WBGene00001117	48.1584	0.615723	0.198819	3.09691	0.00195552	0.0495083	dyf-1
WBGene00001118	73.8828	0.28765	0.172941	1.66328	0.096256	0.402188	dyf-2
WBGene00001119	75.4703	-0.134928	0.378913	-0.356092	0.721771	0.897654	dyf-3
WBGene00001121	31.7174	0.289257	0.253199	1.14241	0.253283	0.599997	dyf-5
WBGene00001122	42.202	0.239515	0.279068	0.858267	0.390745	0.71287	dyf-6
WBGene00001123	197.39	-0.00171692	0.106132	-0.0161772	0.987093	0.995416	dyf-7
WBGene00001127	20.6006	0.137527	0.298809	0.46025	0.645337	0.860589	dyf-11
WBGene00001129	13.9011	0.500197	0.371822	1.34526	0.178542	0.519407	dyf-13
WBGene00001130	1840.37	0.14786	0.0803622	1.83992	0.0657798	0.338099	dyn-1
WBGene00001131	3498.14	0.15132	0.105954	1.42817	0.153243	0.488414	dys-1
WBGene00001132	7116.78	-0.0522754	0.0937124	-0.557828	0.576962	0.828402	alp-1
WBGene00001133	21.7084	0.0762157	0.301807	0.252531	0.800631	0.92988	eat-2
WBGene00001134	2629.98	-0.0612371	0.0624697	-0.980268	0.326954	0.661997	eat-3
WBGene00001135	106.418	-0.0529251	0.139015	-0.380714	0.703415	0.88882	eat-4
WBGene00001136	35.7525	0.0395007	0.234668	0.168326	0.866327	0.953795	eat-5
WBGene00001137	31693.8	-0.0418503	0.0766667	-0.545874	0.585153	0.831954	eat-6
WBGene00001145	762.781	-0.0603933	0.0884492	-0.682802	0.494732	0.781951	eat-16
WBGene00001147	16.6155	-0.543857	0.401476	-1.35464	0.175531	0.515885	eat-18
WBGene00001148	1266.1	0.212477	0.30334	0.700459	0.483641	0.775573	eat-20
WBGene00001149	4367.58	-0.157606	0.122459	-1.28701	0.198091	0.544922	bcat-1
WBGene00001150	233.166	0.106961	0.1815	0.589316	0.555649	0.816708	ech-1.1
WBGene00001151	720.633	-0.11583	0.0682252	-1.69776	0.0895537	0.391719	ech-2
WBGene00001152	265.089	0.155077	0.104732	1.48071	0.138684	0.46816	ech-3
WBGene00001153	2544.08	-0.0598657	0.0774045	-0.773414	0.439277	0.746933	ech-4
WBGene00001154	1671.94	-0.0483545	0.0542574	-0.891205	0.372819	0.697636	ech-5
WBGene00001155	3807.37	0.0333199	0.0933161	0.357065	0.721043	0.89725	ech-6
WBGene00001156	649.825	0.517809	0.337821	1.53279	0.125328	0.448635	ech-7
WBGene00001157	333.912	0.132118	0.0909032	1.45339	0.146116	0.479127	ech-8
WBGene00001158	423.892	0.708573	0.306308	2.31327	0.0207078	0.194354	ech-9
WBGene00001159	241.267	0.37931	0.215402	1.76095	0.0782477	0.368677	eff-1
WBGene00001160	1903.82	0.0765194	0.0680541	1.12439	0.260847	0.605632	efk-1
WBGene00001161	645.971	-0.172991	0.101503	-1.7043	0.0883242	0.389635	efl-1
WBGene00001162	337.567	-0.16709	0.114237	-1.46266	0.14356	0.474713	efl-2
WBGene00001163	233.476	0.0763404	0.117297	0.650828	0.515158	0.793912	efn-2
WBGene00001164	97.0382	-0.336586	0.146459	-2.29816	0.0215529	0.197468	efn-3
WBGene00001165	91.8235	0.0130637	0.183725	0.0711043	0.943315	0.978622	efn-4
WBGene00001166	3942.99	-0.0322704	0.0568191	-0.567949	0.570069	0.824491	eftu-2
WBGene00001167	135105	-0.0876177	0.0533972	-1.64087	0.100825	0.410642	eef-2
WBGene00001168	226696	-0.221786	0.0990897	-2.23824	0.0252055	0.214647	eef-1A.1
WBGene00001169	26269.9	0.0651015	0.134442	0.484236	0.628219	0.85192	eef-1A.2
WBGene00001170	11.6457	0.114433	0.428135	0.267282	0.789252	0.927051	egl-1
WBGene00001171	141.46	0.190898	0.128321	1.48766	0.136841	0.466367	egl-2
WBGene00001172	2821.12	0.311049	0.0653993	4.75615	1.97322e-06	0.000304826	egl-3
WBGene00001173	7518.75	-0.00746173	0.0757771	-0.0984695	0.921559	0.971565	egl-4
WBGene00001174	58.4456	0.0808194	0.177677	0.454867	0.649205	0.862385	egl-5
WBGene00001175	29.9668	0.196112	0.267475	0.733196	0.463439	0.762752	egl-6
WBGene00001177	2993.99	-0.0459677	0.0677835	-0.678154	0.497674	0.78369	egl-8
WBGene00001178	622.252	0.166675	0.100332	1.66123	0.0966666	0.402894	egl-9
WBGene00001179	910.57	-0.0137017	0.0774564	-0.176895	0.859591	0.9506	egl-10
WBGene00001182	706.005	0.244104	0.123597	1.975	0.0482681	0.296864	egl-13
WBGene00001184	452.593	0.202475	0.211316	0.958161	0.337981	0.671435	egl-15
WBGene00001185	62.8482	0.22594	0.172956	1.30634	0.191437	0.534638	egl-17
WBGene00001186	152.364	-0.0637965	0.185115	-0.344631	0.730372	0.900803	egl-18
WBGene00001187	1564.04	0.147973	0.139288	1.06235	0.288075	0.63041	egl-19
WBGene00001188	183.053	-0.00322768	0.10943	-0.0294955	0.976469	0.991599	egl-20
WBGene00001189	2686.81	0.299014	0.0568128	5.26314	1.41619e-07	3.63504e-05	egl-21
WBGene00001190	201.211	0.154437	0.122434	1.26138	0.207171	0.556057	egl-23
WBGene00001193	226.606	-0.0715445	0.116996	-0.611512	0.540861	0.80889	egl-26
WBGene00001194	2607.8	-0.0611619	0.092132	-0.66385	0.506786	0.788583	egl-27
WBGene00001196	4636.62	0.0529319	0.109889	0.481686	0.630029	0.85232	egl-30
WBGene00001202	108.902	0.0181413	0.15335	0.1183	0.90583	0.965723	egl-36
WBGene00001204	45.6066	-0.186634	0.239148	-0.780409	0.43515	0.743643	egl-38
WBGene00001207	107.257	0.35772	0.183372	1.95079	0.0510825	0.305689	egl-43
WBGene00001208	1169.64	0.0856262	0.0822226	1.04139	0.297693	0.639099	egl-44
WBGene00001209	8621.41	-0.0510484	0.0455477	-1.12077	0.262387	0.60711	egl-45
WBGene00001210	20.6923	0.330503	0.295499	1.11846	0.263372	0.607424	egl-46
WBGene00001211	32.512	0.226836	0.253259	0.895667	0.370431	0.696141	egl-47
WBGene00001214	2269.91	-0.162785	0.0538134	-3.02499	0.0024864	0.058676	ego-1
WBGene00001215	2470.55	-0.0444688	0.134532	-0.330544	0.740989	0.905573	ego-2
WBGene00001223	0.067215	0.532217	3.81698	0.139434	0.889107	NA	ehn-3
WBGene00001224	1165.62	-0.121477	0.0667007	-1.82123	0.0685716	0.344282	ehs-1
WBGene00001225	6637.96	0.00909433	0.0564223	0.161183	0.871949	0.955214	eif-3.B
WBGene00001226	9249.62	-0.0499363	0.0956577	-0.522031	0.601649	0.839922	eif-3.C
WBGene00001227	5294.19	-0.098289	0.0675272	-1.45555	0.145518	0.477824	eif-3.D
WBGene00001228	4523.43	-0.0343864	0.0625546	-0.549701	0.582524	0.831223	eif-3.E
WBGene00001229	3491.67	-0.0922532	0.0488226	-1.88956	0.0588167	0.323842	eif-3.F
WBGene00001230	2932.75	-0.0616911	0.0742061	-0.831348	0.405777	0.722754	eif-3.G
WBGene00001231	3217.39	-0.0658852	0.0700871	-0.940048	0.347193	0.679802	eif-3.H
WBGene00001232	4367.98	-0.144556	0.079931	-1.80851	0.0705269	0.348673	eif-3.I
WBGene00001233	2561.07	-0.135481	0.0513279	-2.63951	0.00830254	0.120138	eif-3.K
WBGene00001234	1930.05	-0.0978857	0.0758091	-1.29121	0.19663	0.542961	eif-6
WBGene00001235	474.596	-0.0134963	0.105067	-0.128455	0.897789	0.96278	elb-1
WBGene00001236	634.136	0.0369985	0.0837931	0.441545	0.658818	0.866719	elc-1
WBGene00001237	2.97213	-1.25519	0.941243	-1.33355	0.182352	NA	elc-2
WBGene00001239	10529.3	-0.279731	0.129247	-2.16431	0.0304404	0.235124	elo-1
WBGene00001240	2392.02	0.402989	0.334804	1.20366	0.228723	0.5796	elo-2
WBGene00001241	2925.28	0.0176412	0.108008	0.163332	0.870257	0.955113	elo-3
WBGene00001242	430.14	0.477621	0.342837	1.39314	0.163577	0.499852	elo-4
WBGene00001243	3907.88	0.625641	0.259095	2.41471	0.0157476	0.170164	elo-5
WBGene00001244	7693.44	0.320819	0.225886	1.42027	0.155529	0.489761	elo-6
WBGene00001245	310.257	0.141135	0.186479	0.756843	0.449144	0.753549	elo-7
WBGene00001246	408.817	-0.288197	0.106981	-2.6939	0.00706214	0.110117	elo-8
WBGene00001247	463.645	-0.0172702	0.166585	-0.103672	0.91743	0.96976	elo-9
WBGene00001248	463.814	0.0672606	0.0757904	0.887456	0.374834	0.69874	elp-1
WBGene00001249	267.87	-0.0826987	0.101915	-0.81145	0.417107	0.731681	elt-1
WBGene00001250	574.722	0.0808741	0.166559	0.485558	0.627281	0.851316	elt-2
WBGene00001251	575.69	0.012607	0.206115	0.0611648	0.951228	0.982011	elt-3
WBGene00001252	19.1086	-0.0988059	0.306587	-0.322277	0.747243	0.90927	elt-4
WBGene00001253	52.854	-0.0546576	0.212137	-0.257653	0.796675	0.928812	elt-6
WBGene00001258	3778.23	-0.0901165	0.0625205	-1.44139	0.149474	0.48452	emb-4
WBGene00001259	5455.96	-0.0152359	0.0583054	-0.261311	0.793852	0.928564	emb-5
WBGene00001262	4390.56	-0.0371792	0.0646535	-0.575053	0.565255	0.822003	emb-8
WBGene00001263	43462.8	-0.325854	0.165577	-1.96799	0.0490694	0.299078	emb-9
WBGene00001281	1077.6	-0.0355161	0.0816206	-0.435136	0.663464	0.869198	emb-27
WBGene00001284	1562.35	-0.122917	0.063569	-1.93361	0.0531614	0.310922	emb-30
WBGene00001303	6864.64	-0.0588421	0.102656	-0.573197	0.566512	0.82239	emo-1
WBGene00001309	869.846	-0.102246	0.084275	-1.21324	0.225037	0.575937	emr-1
WBGene00001310	2.26734	-0.805599	0.869372	-0.926644	0.354111	NA	end-1
WBGene00001311	1.99722	0.863532	1.03614	0.833416	0.40461	NA	end-3
WBGene00001320	3206.94	-0.2049	0.0818666	-2.50285	0.0123197	0.149811	ent-1
WBGene00001324	1141.36	0.0468568	0.0987396	0.474549	0.635109	0.854901	eor-1
WBGene00001325	312.146	0.107669	0.127401	0.845118	0.398045	0.717445	eor-2
WBGene00001328	12303.9	0.0502296	0.12792	0.392664	0.694568	0.884445	epi-1
WBGene00001329	2512.81	0.26871	0.173853	1.54562	0.122197	0.445417	epn-1
WBGene00001330	4009.4	-0.00864678	0.121465	-0.0711877	0.943248	0.978622	eps-8
WBGene00001331	2588.08	0.193336	0.170395	1.13463	0.25653	0.602951	erd-2
WBGene00001332	577.319	0.0411655	0.0844434	0.487493	0.625909	0.850588	eri-1
WBGene00001333	10113.2	-0.0809926	0.0653537	-1.2393	0.215236	0.564996	erm-1
WBGene00001334	2057.03	-0.00459469	0.109356	-0.0420161	0.966486	0.98763	ero-1
WBGene00001335	237.97	0.452237	0.117895	3.83593	0.000125092	0.0072447	F35A5.8
WBGene00001336	4384.32	0.0471942	0.0597034	0.790477	0.429249	0.740419	qars-1
WBGene00001337	7012.28	-0.0906838	0.0428758	-2.11503	0.0344271	0.250712	ears-1
WBGene00001338	574.042	0.125831	0.0782753	1.60754	0.107936	0.424225	ears-2
WBGene00001340	2114.69	-0.0195017	0.0753974	-0.258652	0.795904	0.928564	etr-1
WBGene00001345	1159.89	-0.268331	0.0891113	-3.01119	0.00260228	0.0599469	fos-1
WBGene00001352	1942.63	-0.0735659	0.0708036	-1.03901	0.298798	0.639237	evl-14
WBGene00001358	270.116	-0.231035	0.106373	-2.17192	0.0298613	0.232889	evl-20
WBGene00001365	682.478	-0.130047	0.073934	-1.75896	0.078585	0.36923	exc-4
WBGene00001366	566.983	-0.066806	0.0967451	-0.690537	0.489857	0.77925	exc-5
WBGene00001368	759.737	0.0549879	0.149151	0.368673	0.712372	0.893055	exc-7
WBGene00001371	1095.69	-0.0754579	0.0684966	-1.10163	0.270623	0.614176	exl-1
WBGene00001372	1053.42	-0.248598	0.137547	-1.80736	0.0707054	0.348757	exo-3
WBGene00001373	43.4304	-0.0895328	0.196184	-0.456373	0.648122	0.861634	exp-1
WBGene00001374	215.415	0.0378039	0.102563	0.368594	0.71243	0.893055	exp-2
WBGene00001377	39.6478	0.0066174	0.296769	0.0222982	0.98221	0.993247	eya-1
WBGene00001385	21315.6	-0.0238403	0.0986502	-0.241665	0.80904	0.932984	far-1
WBGene00001386	68623.6	-0.0242348	0.108555	-0.223248	0.823342	0.938657	far-2
WBGene00001387	591.934	0.387128	0.372246	1.03998	0.29835	0.639169	far-3
WBGene00001388	1.07532	1.79197	1.47625	1.21387	0.224798	NA	far-4
WBGene00001389	140.431	0.431505	0.193474	2.23029	0.0257279	0.217339	far-5
WBGene00001390	1487.82	0.287739	0.067968	4.23345	2.30136e-05	0.00206429	far-6
WBGene00001391	103.363	0.375741	0.297359	1.26359	0.206376	0.554821	far-7
WBGene00001392	1754.98	-0.0394493	0.0581698	-0.678175	0.497661	0.78369	far-8
WBGene00001393	13597.6	0.168197	0.0889745	1.89039	0.0587053	0.323842	fat-1
WBGene00001394	15805	0.302099	0.138085	2.18777	0.0286863	0.229153	fat-2
WBGene00001395	2656.66	0.17108	0.161081	1.06207	0.288202	0.630469	fat-3
WBGene00001396	7372.18	0.140398	0.108192	1.29768	0.194397	0.539769	fat-4
WBGene00001397	839.325	0.687395	0.366772	1.87418	0.0609062	0.328844	fat-5
WBGene00001398	9357.9	0.660392	0.276158	2.39136	0.0167861	0.176471	fat-6
WBGene00001399	342.484	-0.175422	0.345579	-0.507619	0.611721	0.844095	fat-7
WBGene00001400	10.0602	0.848903	0.488278	1.73857	0.0821111	0.376772	fax-1
WBGene00001401	790.45	-0.296863	0.0796648	-3.7264	0.000194234	0.0100332	fbf-1
WBGene00001402	761.145	-0.253302	0.100606	-2.51776	0.0118103	0.146392	fbf-2
WBGene00001403	1674.64	-0.0810156	0.205145	-0.394918	0.692903	0.883349	fbl-1
WBGene00001404	3465.25	0.0923028	0.100275	0.9205	0.357311	0.686795	fbp-1
WBGene00001405	2406.65	0.0117835	0.0647361	0.182024	0.855564	0.949085	fce-1
WBGene00001406	516.446	-0.143451	0.0853432	-1.68087	0.0927872	0.396586	fce-2
WBGene00001410	1015.03	-0.188494	0.177242	-1.06348	0.287563	0.629871	feh-1
WBGene00001411	1558.9	-0.0548883	0.0484084	-1.13386	0.256854	0.602951	fem-1
WBGene00001412	1473.7	-0.0656902	0.0881541	-0.745174	0.456167	0.758704	fem-2
WBGene00001413	448.002	-0.301775	0.190602	-1.58328	0.113358	0.431271	fem-3
WBGene00001414	784.556	0.0487139	0.191723	0.254085	0.79943	0.929336	fer-1
WBGene00001423	16513.3	-0.136039	0.0719422	-1.89094	0.0586321	0.323842	fib-1
WBGene00001424	207.041	-0.134226	0.121872	-1.10138	0.270733	0.614176	fis-1
WBGene00001425	331.149	0.127799	0.0876449	1.45815	0.144799	0.476573	fis-2
WBGene00001426	2560.77	0.04083	0.0843379	0.484124	0.628298	0.85192	fkb-1
WBGene00001427	7978.81	-0.125712	0.0992059	-1.26719	0.205089	0.553121	fkb-2
WBGene00001428	2549.11	0.388707	0.335721	1.15783	0.246935	0.593791	fkb-3
WBGene00001429	585.198	0.69502	0.378173	1.83784	0.0660864	0.33867	fkb-4
WBGene00001430	1612.27	1.24374	0.681373	1.82534	0.06795	0.342584	fkb-5
WBGene00001431	5935.39	-0.0960953	0.0615139	-1.56217	0.118248	0.439314	fkb-6
WBGene00001432	49.8055	2.20397	0.72006	3.06081	0.00220736	0.0541581	fkb-7
WBGene00001433	193.853	0.433465	0.105939	4.09164	4.28336e-05	0.00326318	fkb-8
WBGene00001434	3.9338	-0.442224	0.700805	-0.631023	0.528025	0.801605	fkh-2
WBGene00001435	16.5594	-0.547561	0.580417	-0.943392	0.34548	0.678037	fkh-3
WBGene00001436	2.46573	-0.382426	1.10476	-0.346162	0.729221	NA	fkh-4
WBGene00001437	4.29173	0.158832	0.646105	0.245829	0.805814	0.931483	fkh-5
WBGene00001438	256.08	0.0678423	0.140659	0.482317	0.629581	0.852243	fkh-6
WBGene00001439	492.84	0.298412	0.171132	1.74376	0.0812014	0.374348	fkh-7
WBGene00001440	28.6475	0.550902	0.238034	2.31439	0.0206466	0.194078	fkh-8
WBGene00001441	1754.75	-0.0853923	0.0850369	-1.00418	0.315293	0.651435	fkh-9
WBGene00001442	15.7253	1.03405	0.391525	2.64108	0.00826428	0.119793	fkh-10
WBGene00001443	2055.94	0.0050645	0.0486429	0.104116	0.917077	0.969638	fli-1
WBGene00001444	597.181	0.301441	0.107856	2.79484	0.00519256	0.0909052	flp-1
WBGene00001445	140.776	-0.031226	0.137991	-0.22629	0.820976	0.937712	flp-2
WBGene00001446	413.746	0.176031	0.0912931	1.92819	0.0538314	0.312015	flp-3
WBGene00001447	151.002	0.226388	0.127017	1.78234	0.0746934	0.359857	flp-4
WBGene00001448	371.541	0.00199615	0.101725	0.019623	0.984344	0.994056	flp-5
WBGene00001449	494.804	0.14805	0.0687146	2.15456	0.0311966	0.238317	flp-6
WBGene00001450	187.274	0.379111	0.135898	2.78967	0.00527611	0.0914694	flp-7
WBGene00001451	369.998	0.274056	0.130251	2.10406	0.0353736	0.253821	flp-8
WBGene00001452	697.094	0.150698	0.0898827	1.67661	0.0936194	0.39724	flp-9
WBGene00001453	487.63	-0.00749287	0.0920553	-0.0813953	0.935128	0.977215	flp-10
WBGene00001454	451.03	0.400294	0.0939912	4.25884	2.05489e-05	0.00188372	flp-11
WBGene00001455	433.507	-0.0313539	0.0857598	-0.365601	0.714663	0.894347	flp-12
WBGene00001456	335.683	0.187801	0.133043	1.41158	0.158073	0.492823	flp-13
WBGene00001457	642.085	0.213716	0.111338	1.91953	0.0549175	0.314521	flp-14
WBGene00001458	193.784	0.112897	0.111819	1.00964	0.312666	0.649969	flp-15
WBGene00001459	368.09	-0.0190828	0.098136	-0.194453	0.845821	0.944815	flp-16
WBGene00001460	300.464	0.33291	0.120582	2.76086	0.00576485	0.096741	flp-17
WBGene00001461	464.16	0.177554	0.0815026	2.17851	0.0293678	0.231338	flp-18
WBGene00001462	272.023	0.272762	0.110918	2.45913	0.0139275	0.159264	flp-19
WBGene00001463	100.702	0.286378	0.182139	1.57231	0.115879	0.434963	flp-20
WBGene00001464	118.176	-0.0945764	0.128478	-0.736131	0.461651	0.761938	flp-21
WBGene00001465	303.112	0.18133	0.100069	1.81205	0.0699792	0.348101	flr-1
WBGene00001466	127.578	0.00763034	0.176084	0.0433335	0.965436	0.987513	flr-2
WBGene00001468	124.093	-0.088083	0.154289	-0.570896	0.56807	0.823461	flr-4
WBGene00001470	356.75	0.320137	0.0928034	3.44962	0.000561368	0.0207209	baz-2
WBGene00001475	222.186	0.520987	0.214044	2.43401	0.0149324	0.165215	fmi-1
WBGene00001476	1006.18	-0.0358767	0.197501	-0.181654	0.855855	0.949091	fmo-1
WBGene00001477	21.1571	-0.194016	0.474004	-0.409313	0.68231	0.87923	fmo-2
WBGene00001478	512.908	0.330198	0.168225	1.96284	0.0496647	0.300983	fmo-3
WBGene00001479	2367.74	0.177237	0.189842	0.933605	0.350508	0.682107	fmo-4
WBGene00001480	635.52	0.0767549	0.107569	0.71354	0.475511	0.769564	fmo-5
WBGene00001481	191.809	-0.38324	0.226089	-1.69509	0.0900592	0.39228	fog-1
WBGene00001482	327.916	-0.102772	0.191642	-0.536273	0.59177	0.83444	fog-2
WBGene00001483	36.8467	1.05525	0.488378	2.16072	0.0307166	0.236382	fog-3
WBGene00001484	174.176	0.148546	0.101469	1.46396	0.143205	0.474241	fox-1
WBGene00001485	737.021	0.0343427	0.0617057	0.556557	0.57783	0.828508	fre-1
WBGene00001486	248.993	-0.054912	0.0912498	-0.601777	0.547323	0.812631	frh-1
WBGene00001487	419.645	-0.170697	0.0988798	-1.72631	0.0842924	0.380255	frk-1
WBGene00001488	16245.4	-0.11231	0.0452616	-2.48135	0.0130885	0.15378	frm-1
WBGene00001489	1147.37	0.0430599	0.14638	0.294164	0.768632	0.91776	frm-2
WBGene00001490	402.9	0.0952237	0.109478	0.869797	0.384411	0.707048	frm-3
WBGene00001491	2767.71	-0.119552	0.0842159	-1.41958	0.155729	0.489761	frm-4
WBGene00001492	1551.43	0.135095	0.100356	1.34616	0.17825	0.519084	frm-5.1
WBGene00001493	2206.32	-0.229341	0.106654	-2.15033	0.0315288	0.239517	frm-7
WBGene00001494	244.235	0.0660706	0.0962661	0.686333	0.492503	0.780779	frm-8
WBGene00001495	234.825	-0.131766	0.138497	-0.951399	0.341402	0.674533	frm-9
WBGene00001496	1339.11	-0.102463	0.119383	-0.858272	0.390742	0.71287	frm-10
WBGene00001497	3605.47	-0.00386122	0.0485643	-0.0795074	0.936629	0.977787	fars-1
WBGene00001498	3964.04	-0.062333	0.0567463	-1.09845	0.272008	0.61522	fars-3
WBGene00001499	1008.28	-0.0767084	0.14814	-0.517809	0.604591	0.840915	fsn-1
WBGene00001500	65.7937	-0.104419	0.41547	-0.251327	0.801562	0.930037	ftn-1
WBGene00001501	8076.05	0.0813225	0.137447	0.591664	0.554075	0.815819	ftn-2
WBGene00001502	12483.2	-0.0741305	0.0838871	-0.883694	0.376862	0.700675	ftt-2
WBGene00001503	7633.26	-0.0460579	0.0635374	-0.724895	0.468516	0.76567	fum-1
WBGene00001505	482.669	0.0617502	0.0763533	0.808743	0.418663	0.732574	fut-1
WBGene00001506	178.349	0.414449	0.166202	2.49364	0.012644	0.150896	fut-2
WBGene00001507	52.0567	-0.274906	0.254777	-1.07901	0.280584	0.622675	fut-4
WBGene00001508	712.418	0.0825285	0.0811758	1.01666	0.309313	0.647284	fut-8
WBGene00001509	1621.89	-0.108625	0.0439171	-2.47341	0.0133831	0.155925	fzo-1
WBGene00001510	1897.27	-0.233663	0.0879454	-2.65691	0.00788603	0.116743	fzr-1
WBGene00001511	2021.07	-0.159109	0.112172	-1.41843	0.156064	0.490168	fzy-1
WBGene00001512	37.8854	-0.00358313	0.211434	-0.0169468	0.986479	0.995128	gab-1
WBGene00001513	1173.95	-0.18588	0.087078	-2.13464	0.0327907	0.24456	gad-1
WBGene00001514	1577.02	-0.238629	0.109017	-2.18892	0.0286026	0.229096	xnd-1
WBGene00001515	202.78	-0.0121312	0.0985562	-0.123089	0.902036	0.964284	gap-1
WBGene00001516	1672.31	0.024441	0.132024	0.185125	0.853131	0.94815	gap-2
WBGene00001517	141.359	-0.0157815	0.131808	-0.119732	0.904696	0.965055	gar-1
WBGene00001518	193.548	0.167729	0.196446	0.853821	0.393204	0.714282	gar-2
WBGene00001519	168.552	0.00350981	0.130905	0.0268119	0.97861	0.992237	gar-3
WBGene00001520	5133.65	0.171527	0.0961208	1.7845	0.074343	0.359068	gas-1
WBGene00001522	293.14	0.190291	0.121444	1.5669	0.117137	0.437306	gbh-1
WBGene00001523	489.6	0.0502253	0.0975685	0.51477	0.606714	0.842009	gbh-2
WBGene00001526	2136.81	-0.0813789	0.0372179	-2.18655	0.0287752	0.229486	gck-1
WBGene00001527	2784.11	0.0256285	0.0440287	0.582086	0.560509	0.818896	gcs-1
WBGene00001528	1.41613	-0.537962	1.31048	-0.410509	0.681432	NA	gcy-1
WBGene00001529	23.0927	-0.120746	0.312578	-0.386291	0.699281	0.886333	gcy-2
WBGene00001530	5.65277	-0.231127	0.511208	-0.452119	0.651183	0.863003	gcy-3
WBGene00001531	3.4176	0.0792672	0.697106	0.113709	0.909469	NA	gcy-4
WBGene00001532	12.4177	0.00255977	0.485953	0.00526752	0.995797	0.998444	gcy-5
WBGene00001533	6.2123	-0.0973557	0.492998	-0.197477	0.843454	0.944189	gcy-6
WBGene00001534	15.8361	0.143607	0.418665	0.343012	0.73159	0.901335	gcy-7
WBGene00001535	33.991	0.528735	0.243404	2.17225	0.0298368	0.232889	gcy-8
WBGene00001536	30.3727	0.16168	0.227581	0.710431	0.477437	0.770983	gcy-9
WBGene00001537	144.252	0.457086	0.117015	3.90621	9.37565e-05	0.00590369	gcy-11
WBGene00001538	2525.95	0.135947	0.0937264	1.45047	0.146927	0.480182	gcy-12
WBGene00001539	1.50774	-0.101498	1.25574	-0.0808268	0.93558	NA	gcy-13
WBGene00001540	2.76492	0.169008	0.978956	0.172641	0.862933	NA	gcy-14
WBGene00001541	104.726	0.568219	0.140005	4.05855	4.93784e-05	0.00365795	gcy-15
WBGene00001542	11.4868	0.339572	0.428124	0.793165	0.427682	0.73925	gcy-17
WBGene00001543	57.0092	-0.604248	0.210493	-2.87063	0.00409654	0.079271	gcy-18
WBGene00001544	42.8719	0.367119	0.200504	1.83098	0.0671035	0.340586	gcy-19
WBGene00001545	4.83859	-0.0665855	0.673926	-0.0988024	0.921295	0.971517	gcy-20
WBGene00001546	94.8366	0.66697	0.194881	3.42244	0.00062061	0.0224507	gcy-21
WBGene00001547	103.89	0.395128	0.385944	1.02379	0.305932	0.645596	gcy-22
WBGene00001548	34.3266	0.626274	0.236747	2.64533	0.0081612	0.118918	gcy-23
WBGene00001549	3.55957	-0.0935732	0.880548	-0.106267	0.915371	NA	gcy-25
WBGene00001550	2.52599	0.898499	0.818242	1.09809	0.272167	NA	gcy-27
WBGene00001551	18.3787	0.252053	0.355332	0.709345	0.478111	0.771036	gcy-31
WBGene00001552	25.0642	0.512249	0.271123	1.88936	0.0588432	0.323842	gcy-32
WBGene00001553	22.5992	0.226736	0.352252	0.643677	0.519785	0.796774	gcy-33
WBGene00001554	8.63968	0.260481	0.439081	0.593242	0.553019	0.815645	gcy-34
WBGene00001555	54.2767	0.213096	0.25645	0.830947	0.406004	0.722756	gcy-35
WBGene00001556	28.4354	0.279365	0.298123	0.937081	0.348717	0.680303	gcy-36
WBGene00001557	33.2923	0.565613	0.243567	2.32221	0.0202217	0.192379	gcy-37
WBGene00001558	11548.4	0.0478456	0.0746415	0.641005	0.52152	0.797717	gdi-1
WBGene00001559	1966.2	-0.0410057	0.113082	-0.362619	0.71689	0.895918	gei-1
WBGene00001560	4330.78	-0.112815	0.0664993	-1.69649	0.0897933	0.391971	gei-3
WBGene00001561	2267.31	-0.195482	0.0989337	-1.97589	0.048167	0.296864	gei-4
WBGene00001562	2022	-0.030033	0.0620929	-0.483679	0.628614	0.852043	lin-66
WBGene00001563	1579.55	-0.0855893	0.0822817	-1.0402	0.298247	0.639169	gei-6
WBGene00001564	14928.7	-0.0767296	0.168275	-0.455976	0.648407	0.861788	icl-1
WBGene00001565	1352.42	0.0600737	0.0760996	0.789409	0.429873	0.740671	gei-8
WBGene00001566	1206.75	-0.0181235	0.0613293	-0.295511	0.767604	0.917393	acdh-13
WBGene00001568	2041.96	-0.0688677	0.0460664	-1.49496	0.134924	0.464098	snpc-4
WBGene00001569	320.828	-0.117532	0.312042	-0.376655	0.70643	0.89044	meg-3
WBGene00001570	906.63	0.448316	0.231464	1.93687	0.0527606	0.309826	gei-13
WBGene00001571	787.153	-0.293605	0.111052	-2.64384	0.00819703	0.119287	gei-14
WBGene00001572	900.096	-0.0231758	0.061333	-0.377869	0.705528	0.890178	gei-15
WBGene00001574	2594.62	-0.0763096	0.0566376	-1.34733	0.177874	0.518639	gei-17
WBGene00001575	36.979	-0.200048	0.359082	-0.557108	0.577453	0.828495	gei-18
WBGene00001577	180.77	-0.147221	0.178778	-0.823483	0.410233	0.72648	gem-4
WBGene00001578	1066.46	0.0535572	0.0848717	0.631038	0.528016	0.801605	ges-1
WBGene00001579	1071.28	0.0287432	0.0792063	0.362891	0.716686	0.895804	gex-2
WBGene00001580	1403.41	-0.189505	0.0762351	-2.4858	0.012926	0.152731	gex-3
WBGene00001581	39710.5	-0.26596	0.140232	-1.89658	0.0578834	0.322124	gfi-1
WBGene00001582	2730.4	-0.11307	0.0512694	-2.2054	0.027426	0.224429	gfi-2
WBGene00001583	200.694	0.486714	0.113506	4.28802	1.8027e-05	0.00169922	gfi-3
WBGene00001584	1685.08	-0.07884	0.0626085	-1.25925	0.207939	0.556772	nrde-4
WBGene00001585	388.696	-0.0466015	0.0883949	-0.527197	0.598057	0.838204	gfl-1
WBGene00001586	29.6383	0.396553	0.276117	1.43618	0.150952	0.486194	ggr-1
WBGene00001587	42.1391	0.485005	0.263314	1.84193	0.0654856	0.337523	ggr-2
WBGene00001588	40.589	0.0514871	0.202651	0.254068	0.799443	0.929336	ggr-3
WBGene00001589	1154.11	-0.0477506	0.0570309	-0.837277	0.402437	0.720878	gip-1
WBGene00001590	210.563	-0.0798421	0.115371	-0.692044	0.48891	0.778498	C45G3.3
WBGene00001591	463.288	0.376956	0.111138	3.39179	0.000694372	0.0244924	glc-1
WBGene00001592	200.106	0.0227027	0.23064	0.0984338	0.921588	0.971565	glc-2
WBGene00001593	25.6837	0.0900512	0.261323	0.344598	0.730397	0.900803	glc-3
WBGene00001594	135.262	0.189323	0.136696	1.385	0.166054	0.50262	glc-4
WBGene00001595	14700.3	-0.263058	0.113417	-2.31939	0.0203741	0.19259	gld-1
WBGene00001596	5506.6	-0.141312	0.0410328	-3.44388	0.000573431	0.0210729	gld-2
WBGene00001597	2929.88	-0.251798	0.149989	-1.67878	0.0931953	0.396861	gld-3
WBGene00001598	13256.7	-0.069042	0.0564486	-1.22309	0.221294	0.571417	glh-1
WBGene00001599	3388.95	-0.216217	0.12936	-1.67143	0.0946363	0.398514	glh-2
WBGene00001600	932.487	-0.21417	0.0984092	-2.17632	0.0295316	0.231817	glh-3
WBGene00001601	4207.61	-0.105036	0.0771523	-1.36141	0.173386	0.512629	glh-4
WBGene00001602	480.264	0.0607394	0.0831454	0.730521	0.465072	0.763594	gln-1
WBGene00001603	1675.77	-0.169144	0.0725288	-2.3321	0.0196956	0.19005	gln-2
WBGene00001604	8847.05	0.100287	0.145482	0.689347	0.490605	0.779478	gln-3
WBGene00001605	189.823	0.0412606	0.174074	0.23703	0.812634	0.934453	gln-4
WBGene00001606	1462.15	-0.315579	0.275895	-1.14384	0.252691	0.59936	gln-5
[truncated: 20,641 more rows]
