# Supplementary material for: Neuronal TORC1 modulates longevity via AMPK and cell nonautonomous regulation of mitochondrial dynamics in C. elegans
Source: eLife journal article supplement (doi:10.7554/elife.49158), 2019-08-14
Supplement: supp [file elife-49158-supp-v1.zip › elife_poa_e49158_Supplemental_file_2.xlsm]

## Sheet: cluster1_genes
genes	symbol
WBGene00000013	abf-2
WBGene00000017	abf-6
WBGene00000022	abt-4
WBGene00000084	aex-1
WBGene00000092	ags-3
WBGene00000095	aha-1
WBGene00000100	ajm-1
WBGene00000102	akt-1
WBGene00000133	amt-1
WBGene00000146	ape-1
WBGene00000156	apr-1
WBGene00000163	apb-3
WBGene00000177	aqp-9
WBGene00000192	arl-8
WBGene00000212	asm-2
WBGene00000217	asp-4
WBGene00000218	asp-5
WBGene00000222	atf-6
WBGene00000237	bam-2
WBGene00000238	bar-1
WBGene00000267	bre-2
WBGene00000277	cab-1
WBGene00000285	cal-1
WBGene00000286	cal-2
WBGene00000288	cal-4
WBGene00000292	cap-1
WBGene00000293	cap-2
WBGene00000301	cav-1
WBGene00000367	cca-1
WBGene00000370	ccg-1
WBGene00000383	cdc-14
WBGene00000387	cdc-25.2
WBGene00000388	cdc-25.3
WBGene00000391	cdd-1
WBGene00000393	cdf-1
WBGene00000395	cdh-3
WBGene00000403	casy-1
WBGene00000409	cdk-8
WBGene00000411	cdl-1
WBGene00000413	cdt-1
WBGene00000415	ced-1
WBGene00000420	ced-6
WBGene00000444	ceh-21
WBGene00000453	ceh-32
WBGene00000460	ceh-39
WBGene00000461	ceh-40
WBGene00000477	cft-1
WBGene00000498	chk-1
WBGene00000516	cki-1
WBGene00000520	cku-80
WBGene00000522	clc-1
WBGene00000528	clh-1
WBGene00000529	clh-2
WBGene00000530	clh-3
WBGene00000531	clh-4
WBGene00000534	cpi-2
WBGene00000542	clp-1
WBGene00000554	cnb-1
WBGene00000591	coh-1
WBGene00000652	col-76
WBGene00000779	cpn-3
WBGene00000783	cpr-3
WBGene00000789	cpz-2
WBGene00000793	crh-1
WBGene00000794	crn-1
WBGene00000803	csb-1
WBGene00000831	ctl-2
WBGene00000870	cyd-1
WBGene00000876	cyl-1
WBGene00000894	dab-1
WBGene00000898	daf-2
WBGene00000899	daf-3
WBGene00000900	daf-4
WBGene00000901	daf-5
WBGene00000903	daf-7
WBGene00000914	daf-19
WBGene00000958	dgk-1
WBGene00000968	dhs-4
WBGene00000977	dhs-14
WBGene00001022	dnj-4
WBGene00001032	dnj-14
WBGene00001101	dsh-1
WBGene00001157	ech-8
WBGene00001158	ech-9
WBGene00001160	efk-1
WBGene00001172	egl-3
WBGene00001173	egl-4
WBGene00001189	egl-21
WBGene00001194	egl-27
WBGene00001208	egl-44
WBGene00001320	ent-1
WBGene00001345	fos-1
WBGene00001366	exc-5
WBGene00001387	far-3
WBGene00001393	fat-1
WBGene00001394	fat-2
WBGene00001395	fat-3
WBGene00001396	fat-4
WBGene00001397	fat-5
WBGene00001399	fat-7
WBGene00001444	flp-1
WBGene00001445	flp-2
WBGene00001446	flp-3
WBGene00001447	flp-4
WBGene00001448	flp-5
WBGene00001449	flp-6
WBGene00001450	flp-7
WBGene00001451	flp-8
WBGene00001452	flp-9
WBGene00001455	flp-12
WBGene00001457	flp-14
WBGene00001458	flp-15
WBGene00001459	flp-16
WBGene00001460	flp-17
WBGene00001461	flp-18
WBGene00001462	flp-19
WBGene00001464	flp-21
WBGene00001470	baz-2
WBGene00001484	fox-1
WBGene00001519	gar-3
WBGene00001523	gbh-2
WBGene00001537	gcy-11
WBGene00001541	gcy-15
WBGene00001546	gcy-21
WBGene00001562	lin-66
WBGene00001564	icl-1
WBGene00001577	gem-4
WBGene00001582	gfi-2
WBGene00001591	glc-1
WBGene00001621	glt-3
WBGene00001623	glt-5
WBGene00001625	glt-7
WBGene00001629	gly-4
WBGene00001651	gon-2
WBGene00001671	gpa-9
WBGene00001708	grk-1
WBGene00001770	gst-22
WBGene00001772	gst-24
WBGene00001788	gst-40
WBGene00001796	gtl-2
WBGene00001820	ham-1
WBGene00001824	hbl-1
WBGene00001834	hda-1
WBGene00001843	hgo-1
WBGene00001853	hil-2
WBGene00001882	his-8
WBGene00001883	his-9
WBGene00001884	his-10
WBGene00001885	his-11
WBGene00001886	his-12
WBGene00001891	his-17
WBGene00001892	his-18
WBGene00001893	his-19
WBGene00001894	his-20
WBGene00001899	his-25
WBGene00001902	his-28
WBGene00001906	his-32
WBGene00001910	C50F4.6
WBGene00001911	his-37
WBGene00001922	his-48
WBGene00001933	his-59
WBGene00001934	his-60
WBGene00001935	his-61
WBGene00001938	his-64
WBGene00001939	his-65
WBGene00001940	his-66
WBGene00001949	hlh-2
WBGene00001955	hlh-11
WBGene00001978	hmp-1
WBGene00001979	hmp-2
WBGene00002035	hum-1
WBGene00002038	hum-5
WBGene00002041	hum-8
WBGene00002043	hyl-1
WBGene00002048	ida-1
WBGene00002054	ifb-2
WBGene00002056	ifc-2
WBGene00002057	ifd-1
WBGene00002058	ifd-2
WBGene00002069	ikb-1
WBGene00002090	ins-7
WBGene00002100	ins-17
WBGene00002101	ins-18
WBGene00002120	ins-37
WBGene00002124	inx-2
WBGene00002129	inx-7
WBGene00002137	inx-15
WBGene00002138	inx-16
WBGene00002174	itx-1
WBGene00002175	jac-1
WBGene00002178	jnk-1
WBGene00002185	kel-3
WBGene00002189	kin-1
WBGene00002192	kin-4
WBGene00002207	sid-3
WBGene00002217	klp-4
WBGene00002234	kqt-2
WBGene00002235	kqt-3
WBGene00002251	lat-1
WBGene00002261	ldb-1
WBGene00002264	lec-1
WBGene00002268	lec-5
WBGene00002269	lec-6
WBGene00002271	lec-8
WBGene00002272	lec-9
WBGene00002273	lec-10
WBGene00002274	lec-11
WBGene00002276	lem-3
WBGene00002632	let-413
WBGene00002717	let-526
WBGene00002881	let-756
WBGene00002977	lev-10
WBGene00002978	lev-11
WBGene00002985	lig-1
WBGene00002989	lim-7
WBGene00002990	lin-1
WBGene00002991	lin-2
WBGene00003007	lin-18
WBGene00003025	lin-40
WBGene00003040	lin-59
WBGene00003056	lon-2
WBGene00003063	lpd-7
WBGene00003083	lst-1
WBGene00003090	lys-1
WBGene00003091	lys-2
WBGene00003092	lys-3
WBGene00003096	lys-7
WBGene00003097	lys-8
WBGene00003099	lys-10
WBGene00003111	mab-20
WBGene00003112	mab-21
WBGene00003151	mca-1
WBGene00003163	mdl-1
WBGene00003174	mec-10
WBGene00003179	mec-18
WBGene00003183	mei-1
WBGene00003185	mek-1
WBGene00003233	mgl-2
WBGene00003238	mig-1
WBGene00003371	mlc-3
WBGene00003372	mlc-4
WBGene00003395	mom-2
WBGene00003409	mrp-3
WBGene00003414	mrp-8
WBGene00003474	mtl-2
WBGene00003499	mut-2
WBGene00003510	mxl-2
WBGene00003540	nas-21
WBGene00003541	nas-22
WBGene00003561	ncr-1
WBGene00003566	ncx-1
WBGene00003593	nfm-1
WBGene00003599	nhl-3
WBGene00003603	nhr-4
WBGene00003604	nhr-5
WBGene00003605	nhr-6
WBGene00003607	nhr-8
WBGene00003610	nhr-11
WBGene00003613	nhr-14
WBGene00003624	nhr-28
WBGene00003630	nhr-40
WBGene00003635	nhr-45
WBGene00003636	nhr-46
WBGene00003639	nhr-49
WBGene00003640	nhr-50
WBGene00003645	nhr-55
WBGene00003646	nhr-56
WBGene00003648	nhr-58
WBGene00003651	nhr-61
WBGene00003653	nhr-63
WBGene00003659	nhr-69
WBGene00003660	nhr-70
WBGene00003661	nhr-71
WBGene00003678	nhr-88
WBGene00003686	nhr-96
WBGene00003688	nhr-98
WBGene00003689	nhr-99
WBGene00003690	nhr-100
WBGene00003695	nhr-105
WBGene00003697	nhr-107
WBGene00003700	nhr-110
WBGene00003702	nhr-112
WBGene00003706	nhr-116
WBGene00003707	nhr-117
WBGene00003709	nhr-119
WBGene00003728	nhr-138
WBGene00003732	nhx-4
WBGene00003739	nlp-1
WBGene00003741	nlp-3
WBGene00003744	nlp-6
WBGene00003745	nlp-7
WBGene00003746	nlp-8
WBGene00003749	nlp-11
WBGene00003751	nlp-13
WBGene00003752	nlp-14
WBGene00003753	nlp-15
WBGene00003755	nlp-17
WBGene00003756	nlp-18
WBGene00003757	nlp-19
WBGene00003759	nlp-21
WBGene00003776	nmy-1
WBGene00003804	npp-18
WBGene00003834	nxf-1
WBGene00003844	odc-1
WBGene00003890	osm-10
WBGene00003893	ost-1
WBGene00003911	pak-1
WBGene00003956	pcp-1
WBGene00003957	pcp-2
WBGene00003961	pct-1
WBGene00003969	pef-1
WBGene00003977	pes-2.1
WBGene00003978	pes-4
WBGene00003979	pes-5
WBGene00003986	mct-4
WBGene00003995	pgp-1
WBGene00003997	pgp-3
WBGene00003999	pgp-5
WBGene00004000	pgp-6
WBGene00004002	pgp-8
WBGene00004005	pgp-11
WBGene00004006	pgp-12
WBGene00004013	pha-4
WBGene00004024	php-3
WBGene00004027	pie-1
WBGene00004030	pin-2
WBGene00004033	pkc-2
WBGene00004034	pkc-3
WBGene00004037	plc-2
WBGene00004055	pmk-1
WBGene00004056	pmk-2
WBGene00004057	pmk-3
WBGene00004058	pmp-1
WBGene00004059	pmp-2
WBGene00004075	pod-1
WBGene00004095	pqe-1
WBGene00004113	pqn-24
WBGene00004135	pqn-48
WBGene00004144	pqn-60
WBGene00004145	pqn-62
WBGene00004148	pqn-65
WBGene00004149	trpl-5
WBGene00004172	pqn-92
WBGene00004182	prk-1
WBGene00004184	T19D2.2
WBGene00004192	prx-2
WBGene00004194	prx-5
WBGene00004198	prx-13
WBGene00004199	prx-14
WBGene00004220	ptr-5
WBGene00004249	pvf-1
WBGene00004271	rab-7
WBGene00004312	rba-1
WBGene00004321	rcan-1
WBGene00004346	rgs-3
WBGene00004350	rgs-7
WBGene00004367	ric-8
WBGene00004400	rom-1
WBGene00004438	rpl-25.1
WBGene00004457	rpm-1
WBGene00004699	rsp-2
WBGene00004701	rsp-4
WBGene00004721	san-1
WBGene00004727	sax-1
WBGene00004728	sax-2
WBGene00004735	sbp-1
WBGene00004738	scc-3
WBGene00004740	scd-2
WBGene00004745	sdc-1
WBGene00004750	sea-1
WBGene00004758	sek-1
WBGene00004762	sel-5
WBGene00004774	sem-5
WBGene00004778	ser-3
WBGene00004795	sid-1
WBGene00004796	sid-2
WBGene00004804	skn-1
WBGene00004809	skr-3
WBGene00004813	skr-7
WBGene00004816	skr-10
WBGene00004819	skr-13
WBGene00004820	skr-14
WBGene00004821	skr-15
WBGene00004825	skr-19
WBGene00004829	sli-1
WBGene00004831	slo-2
WBGene00004854	slt-1
WBGene00004857	sma-3
WBGene00004858	sma-4
WBGene00004860	sma-6
WBGene00004862	sma-9
WBGene00004884	smg-6
WBGene00004924	snt-4
WBGene00004926	snt-6
WBGene00004927	snx-1
WBGene00004928	soc-1
WBGene00004945	sop-2
WBGene00004990	spp-5
WBGene00005000	spp-15
WBGene00005022	sqv-4
WBGene00005077	src-1
WBGene00005349	srh-132
WBGene00005602	srj-14
WBGene00005642	srp-1
WBGene00005643	srp-2
WBGene00005647	srp-6
WBGene00005653	srr-2
WBGene00005657	srr-6
WBGene00005661	srr-10
WBGene00005685	sru-22
WBGene00005833	srw-86
WBGene00006224	str-180
WBGene00006288	str-262
WBGene00006306	sue-1
WBGene00006342	sup-37
WBGene00006349	sur-2
WBGene00006369	sym-4
WBGene00006372	syx-2
WBGene00006384	taf-3
WBGene00006386	taf-5
WBGene00006412	nlg-1
WBGene00006424	ctbp-1
WBGene00006429	arrd-3
WBGene00006459	tag-89
WBGene00006460	ppm-1
WBGene00006464	bath-47
WBGene00006470	tag-120
WBGene00006479	tmbi-4
WBGene00006493	tag-147
WBGene00006498	ten-1
WBGene00006504	kcc-1
WBGene00006533	tba-7
WBGene00006543	tbx-2
WBGene00006568	thk-1
WBGene00006603	tps-2
WBGene00006607	tre-1
WBGene00006608	tre-2
WBGene00006609	tre-3
WBGene00006619	try-1
WBGene00006627	tsp-1
WBGene00006628	tsp-2
WBGene00006678	twk-25
WBGene00006683	twk-31
WBGene00006702	ubc-3
WBGene00006705	ubc-8
WBGene00006720	ubc-25
WBGene00006739	ulp-4
WBGene00006753	unc-14
WBGene00006773	unc-37
WBGene00006795	unc-61
WBGene00006798	unc-64
WBGene00006804	unc-71
WBGene00006816	unc-84
WBGene00006823	unc-94
WBGene00006830	unc-103
WBGene00006839	unc-115
WBGene00006868	vab-1
WBGene00006887	vav-1
WBGene00006896	ver-3
WBGene00006923	vhp-1
WBGene00006971	zak-1
WBGene00006977	zif-1
WBGene00006981	zig-4
WBGene00006982	zig-5
WBGene00006983	zig-6
WBGene00006984	zig-7
WBGene00006986	zip-1
WBGene00006996	zyg-11
WBGene00007012	mdt-4
WBGene00007024	plin-1
WBGene00007025	mdt-29
WBGene00007030	epc-1
WBGene00007053	chd-7
WBGene00007055	tag-196
WBGene00007058	dmd-6
WBGene00007144	B0334.4
WBGene00007153	clec-41
WBGene00007188	B0464.9
WBGene00007219	nlp-38
WBGene00007225	C01G6.3
WBGene00007226	C01G6.4
WBGene00007227	C01G6.5
WBGene00007256	swsn-9
WBGene00007287	gck-4
WBGene00007313	clec-147
WBGene00007316	nlp-41
WBGene00007322	C05B5.5
WBGene00007331	pho-11
WBGene00007336	C05C12.4
WBGene00007365	C06B3.6
WBGene00007368	C06B8.2
WBGene00007392	fbxa-156
WBGene00007393	fbxa-157
WBGene00007404	best-5
WBGene00007417	ceh-58
WBGene00007421	C07H4.1
WBGene00007460	C08F11.13
WBGene00007499	C09H10.5
WBGene00007500	nasp-1
WBGene00007506	C10C5.2
WBGene00007509	C10C5.5
WBGene00007513	wht-2
WBGene00007562	C14A4.12
WBGene00007565	clec-48
WBGene00007586	ril-2
WBGene00007604	xbx-9
WBGene00007609	C15C8.7
WBGene00007614	gnrr-2
WBGene00007650	ugt-23
WBGene00007651	nra-3
WBGene00007660	pals-6
WBGene00007666	C18B12.4
WBGene00007677	C18D4.8
WBGene00007689	C18E9.9
WBGene00007692	C23H4.3
WBGene00007693	C23H4.4
WBGene00007694	C23H4.6
WBGene00007707	fath-1
WBGene00007716	fbxa-82
WBGene00007717	C25D7.5
WBGene00007730	C25G4.2
WBGene00007745	C26D10.4
WBGene00007746	C26D10.6
WBGene00007751	C26G2.2
WBGene00007753	C27A7.1
WBGene00007764	C27B7.7
WBGene00007765	C27B7.9
WBGene00007772	egrh-1
WBGene00007773	C27C12.3
WBGene00007807	C29F3.7
WBGene00007829	oac-5
WBGene00007833	oac-6
WBGene00007851	clec-245
WBGene00007857	C31H5.6
WBGene00007862	C32C4.1
WBGene00007867	C32H11.4
WBGene00007878	C33A11.2
WBGene00007899	C33D9.5
WBGene00007919	cup-16
WBGene00007928	C34C12.9
WBGene00007932	zip-5
WBGene00007956	trpp-9
WBGene00007963	cyp-25A1
WBGene00007984	irx-1
WBGene00007985	swah-1
WBGene00008021	C39B10.1
WBGene00008031	C39E9.7
WBGene00008035	C39E9.12
WBGene00008048	hpo-41
WBGene00008084	C44C10.3
WBGene00008100	C44H9.5
WBGene00008116	C46E1.3
WBGene00008157	C47F8.1
WBGene00008167	acox-1.5
WBGene00008168	C48B4.3
WBGene00008194	C49C3.4
WBGene00008199	C49C3.9
WBGene00008225	nuaf-1
WBGene00008227	C50B8.5
WBGene00008239	fshr-1
WBGene00008252	C51E3.6
WBGene00008255	C51E3.10
WBGene00008341	ttr-44
WBGene00008350	CE7X_3.2
WBGene00008372	D1054.5
WBGene00008392	D1086.5
WBGene00008394	D1086.7
WBGene00008412	D2030.2
WBGene00008435	glna-2
WBGene00008443	pde-3
WBGene00008446	E01G4.3
WBGene00008447	E01G4.5
WBGene00008476	E03H4.8
WBGene00008485	ugt-43
WBGene00008486	ugt-44
WBGene00008493	F01D5.2
WBGene00008494	F01D5.3
WBGene00008499	cyp-37A1
WBGene00008510	lipl-7
WBGene00008515	F02C12.1
WBGene00008519	cyp-13B1
WBGene00008531	F02E9.7
WBGene00008538	sqrd-1
WBGene00008555	F07C6.4
WBGene00008558	F07H5.7
WBGene00008572	F08B12.4
WBGene00008577	F08G2.5
WBGene00008584	irg-4
WBGene00008586	snrp-40.1
WBGene00008588	F08G12.5
WBGene00008599	F09A5.2
WBGene00008601	mob-2
WBGene00008602	oac-14
WBGene00008606	dhhc-1
WBGene00008629	cpt-5
WBGene00008632	fbxa-88
WBGene00008633	fbxa-18
WBGene00008644	F10C2.3
WBGene00008656	lron-5
WBGene00008677	F11A5.9
WBGene00008726	F13A7.11
WBGene00008729	F13B12.1
WBGene00008741	F13D12.6
WBGene00008770	F13G3.12
WBGene00008793	F14D7.6
WBGene00008799	F14E5.1
WBGene00008819	shw-1
WBGene00008825	F14H3.6
WBGene00008831	F14H3.12
WBGene00008838	F15A4.2
WBGene00008840	F15A4.5
WBGene00008859	F15D4.2
WBGene00008882	F16B12.6
WBGene00008897	F16H6.7
WBGene00008904	F17A2.13
WBGene00008914	F17C11.2
WBGene00008945	F19B2.6
WBGene00008969	F20C5.4
WBGene00008973	F20D1.1
WBGene00008988	F20G2.5
WBGene00009023	F21G4.1
WBGene00009049	F22B8.7
WBGene00009050	F22D6.2
WBGene00009058	F22E12.1
WBGene00009104	F25C8.1
WBGene00009106	acs-12
WBGene00009120	F25H2.6
WBGene00009142	F26A3.4
WBGene00009162	F26E4.7
WBGene00009173	prom-1
WBGene00009174	F26H9.2
WBGene00009186	trcs-1
WBGene00009192	asah-2
WBGene00009201	F28C1.3
WBGene00009215	thn-2
WBGene00009222	fbxa-95
WBGene00009226	cyp-37B1
WBGene00009230	oac-18
WBGene00009233	F28H6.4
WBGene00009245	rict-1
WBGene00009323	best-13
WBGene00009350	F32H5.4
WBGene00009367	F33H2.3
WBGene00009383	F35B12.3
WBGene00009393	clec-62
WBGene00009396	clec-65
WBGene00009397	clec-66
WBGene00009403	F35C11.4
WBGene00009418	F35E8.2
WBGene00009428	F35E12.4
WBGene00009429	irg-5
WBGene00009430	F35E12.6
WBGene00009431	dct-17
WBGene00009432	cld-9
WBGene00009433	F35E12.9
WBGene00009434	F35E12.10
WBGene00009435	F35G2.1
WBGene00009466	F36D1.7
WBGene00009475	F36F2.1
WBGene00009487	clec-232
WBGene00009488	oac-20
WBGene00009490	fbxa-99
WBGene00009512	bigr-1
WBGene00009562	flp-22
WBGene00009587	mig-38
WBGene00009595	F40F12.7
WBGene00009617	F41E7.1
WBGene00009618	F41E7.2
WBGene00009660	F43G6.8
WBGene00009663	hda-5
WBGene00009668	cfim-1
WBGene00009679	F44D12.2
WBGene00009727	lips-1
WBGene00009772	ztf-7
WBGene00009785	F46C5.10
WBGene00009793	pkn-1
WBGene00009796	F46G10.1
WBGene00009797	F46G10.2
WBGene00009798	F46G10.4
WBGene00009805	F47B8.4
WBGene00009820	F47B10.9
WBGene00009824	gpdh-1
WBGene00009825	F47G4.4
WBGene00009842	igeg-2
WBGene00009851	F48F7.6
WBGene00009852	arrd-24
WBGene00009876	F49C12.6
WBGene00009877	F49C12.7
WBGene00009886	F49E2.2
WBGene00009897	skpo-1
WBGene00009902	drd-1
WBGene00009903	F49E12.10
WBGene00009907	F49H6.3
WBGene00009914	F49H6.13
WBGene00009929	abts-2
WBGene00009930	F52D10.2
WBGene00009940	strl-1
WBGene00009946	ogr-2
WBGene00009957	F53B2.8
WBGene00009971	F53C11.1
WBGene00009974	F53C11.4
WBGene00009981	F53F1.3
WBGene00009984	F53F1.6
WBGene00010002	F53F8.5
WBGene00010016	F54B8.1
WBGene00010018	fbxa-69
WBGene00010019	F54B8.4
WBGene00010049	F54D5.3
WBGene00010050	F54D5.4
WBGene00010125	dod-22
WBGene00010127	F55G11.7
WBGene00010128	F55G11.8
WBGene00010133	F55H12.2
WBGene00010150	F56D5.6
WBGene00010174	F56H9.2
WBGene00010177	F57A8.1
WBGene00010185	F57A10.4
WBGene00010191	dmsr-1
WBGene00010198	spat-1
WBGene00010234	ttr-50
WBGene00010264	F58G1.2
WBGene00010282	F58G11.4
WBGene00010290	F58H1.7
WBGene00010296	dgat-2
WBGene00010328	F59C6.11
WBGene00010342	F59F5.3
WBGene00010357	H03A11.2
WBGene00010375	H09F14.1
WBGene00010421	slc-36.4
WBGene00010428	dcn-1
WBGene00010440	ttr-51
WBGene00010444	magi-1
WBGene00010480	K01G5.9
WBGene00010503	K02C4.5
WBGene00010519	K03A11.1
WBGene00010540	K03H1.5
WBGene00010542	K03H1.7
WBGene00010545	cbp-2
WBGene00010546	K03H1.11
WBGene00010555	K04C1.5
WBGene00010558	ptp-4
WBGene00010568	K04G2.10
WBGene00010575	flp-25
WBGene00010597	K06A4.7
WBGene00010605	K06G5.1
WBGene00010609	dut-1
WBGene00010637	K07F5.12
WBGene00010641	crml-1
WBGene00010658	K08D8.4
WBGene00010660	K08D8.6
WBGene00010664	dbn-1
WBGene00010665	K08E3.5
WBGene00010681	mak-1
WBGene00010704	K09A11.1
WBGene00010706	cyp-14A2
WBGene00010744	K10D6.4
WBGene00010746	K10D11.2
WBGene00010749	K10D11.5
WBGene00010750	K10D11.6
WBGene00010756	K10G9.2
WBGene00010772	K11D9.3
WBGene00010778	gpdh-2
WBGene00010788	sulp-4
WBGene00010789	sulp-5
WBGene00010793	LLC1.2
WBGene00010796	clip-1
WBGene00010822	M01G12.9
WBGene00010827	M02B1.2
WBGene00010851	M04C3.2
WBGene00010856	M04C9.1
WBGene00010865	M04D8.7
WBGene00010867	tag-260
WBGene00010872	M05B5.4
WBGene00010873	trpa-2
WBGene00010899	M28.8
WBGene00010901	M28.10
WBGene00010902	M79.2
WBGene00010935	M163.1
WBGene00010943	M176.4
WBGene00010945	chil-13
WBGene00010977	R02D5.3
WBGene00010982	flp-32
WBGene00010998	R03G8.3
WBGene00011010	R04D3.2
WBGene00011054	arrd-13
WBGene00011056	R06B9.5
WBGene00011067	vps-11
WBGene00011095	gana-1
WBGene00011096	R07B7.12
WBGene00011097	nhr-206
WBGene00011103	R07E3.2
WBGene00011106	acl-5
WBGene00011167	chil-23
WBGene00011189	R10D12.8
WBGene00011190	swt-6
WBGene00011222	R10H10.3
WBGene00011230	nud-2
WBGene00011261	nphp-4
WBGene00011263	R13H4.5
WBGene00011270	R31.2
WBGene00011279	asd-1
WBGene00011283	R90.1
WBGene00011287	glb-24
WBGene00011304	mnk-1
WBGene00011312	trcs-2
WBGene00011318	cdt-2
WBGene00011329	zipt-9
WBGene00011330	T01D3.6
WBGene00011342	T01G5.7
WBGene00011344	T01G9.2
WBGene00011361	lyst-1
WBGene00011388	T02G6.5
WBGene00011392	sbt-1
WBGene00011410	T04A8.8
WBGene00011423	ipla-7
WBGene00011424	dhs-31
WBGene00011433	pde-1
WBGene00011434	T04D3.5
WBGene00011435	T04D3.8
WBGene00011451	T04H1.5
WBGene00011479	T05E11.2
WBGene00011490	T05F1.4
WBGene00011509	T05H10.4
WBGene00011517	cgt-1
WBGene00011532	chaf-1
WBGene00011539	fbxa-135
WBGene00011571	ttr-46
WBGene00011573	anmt-3
WBGene00011578	npr-20
WBGene00011579	T07D4.2
WBGene00011625	vps-39
WBGene00011645	T09B9.4
WBGene00011668	clec-47
WBGene00011677	cyp-13A1
WBGene00011688	T10C6.6
WBGene00011692	T10G3.1
WBGene00011707	T11B7.2
WBGene00011723	T12A7.2
WBGene00011726	lpr-2
WBGene00011727	T12A7.6
WBGene00011729	set-16
WBGene00011737	sqst-1
WBGene00011799	T16G1.5
WBGene00011817	T16H12.9
WBGene00011820	T18D3.1
WBGene00011829	T19A6.4
WBGene00011833	T19B10.5
WBGene00011839	T19C4.5
WBGene00011849	T19H5.4
WBGene00011856	T20D3.2
WBGene00011868	best-18
WBGene00011893	T21C9.6
WBGene00011894	ttr-23
WBGene00011898	T21C9.13
WBGene00011915	T22C1.4
WBGene00011953	ppm-2
WBGene00011956	T23F11.4
WBGene00011964	saeg-2
WBGene00011966	T23G7.3
WBGene00011972	T23G11.7
WBGene00011976	T24B8.2
WBGene00011979	T24B8.5
WBGene00011986	T24D1.3
WBGene00012005	2019-06-01
WBGene00012014	T25B9.8
WBGene00012027	fbxa-127
WBGene00012028	srz-99
WBGene00012058	T26F2.2
WBGene00012074	T27A8.2
WBGene00012085	T27D12.1
WBGene00012097	abcf-2
WBGene00012101	zip-10
WBGene00012113	T28B8.1
WBGene00012117	T28B11.1
WBGene00012134	T28F3.8
WBGene00012139	T28F4.4
WBGene00012144	T28H10.3
WBGene00012148	inos-1
WBGene00012157	adbp-1
WBGene00012182	osta-3
WBGene00012194	toe-4
WBGene00012198	W02B8.2
WBGene00012216	W02D9.10
WBGene00012225	W03G11.3
WBGene00012226	W03G11.4
WBGene00012239	W04A8.4
WBGene00012252	W04E12.7
WBGene00012299	W06D11.1
WBGene00012312	W06G6.10
WBGene00012322	W07A12.4
WBGene00012326	W07E11.1
WBGene00012364	zmp-4
WBGene00012381	Y2H9A.4
WBGene00012383	ttr-17
WBGene00012404	Y6G8.2
WBGene00012416	Y7A9A.1
WBGene00012418	Y7A9C.1
WBGene00012443	Y15E3A.4
WBGene00012450	Y17D7B.2
WBGene00012458	ash-2
WBGene00012462	Y17G7B.8
WBGene00012464	arrd-7
WBGene00012494	nhr-232
WBGene00012518	comt-2
WBGene00012525	Y32B12C.1
WBGene00012530	Y32F6A.5
WBGene00012538	Y37A1B.5
WBGene00012546	Y37D8A.4
WBGene00012583	clec-4
WBGene00012585	lips-15
WBGene00012588	lips-16
WBGene00012589	nspe-4
WBGene00012624	fbxa-150
WBGene00012641	epg-6
WBGene00012668	Y39B6A.5
WBGene00012671	Y39B6A.9
WBGene00012683	asp-17
WBGene00012686	Y39B6A.27
WBGene00012699	Y39B6A.41
WBGene00012712	ttm-1
WBGene00012723	Y39G8B.2
WBGene00012747	Y40H7A.10
WBGene00012776	Y42A5A.1
WBGene00012778	Y42A5A.3
WBGene00012782	Y43C5A.2
WBGene00012783	Y43C5A.3
WBGene00012810	nceh-1
WBGene00012819	Y43F8B.9
WBGene00012825	Y43F8C.3
WBGene00012850	Y44A6C.1
WBGene00012857	pbo-5
WBGene00012860	acdh-11
WBGene00012868	tbc-9
WBGene00012888	sas-6
WBGene00012897	pisy-1
WBGene00012903	vps-2
WBGene00012907	cpt-1
WBGene00012921	Y46G5A.36
WBGene00012930	obr-1
WBGene00012961	Y47H10A.5
WBGene00012968	Y48A6B.7
WBGene00012988	ztf-22
WBGene00013008	clec-146
WBGene00013035	Y49E10.16
WBGene00013039	scav-3
WBGene00013073	hmit-1.1
WBGene00013078	ttr-25
WBGene00013080	Y51A2D.13
WBGene00013091	Y51B9A.9
WBGene00013101	Y51H4A.5
WBGene00013118	Y51H4A.24
WBGene00013124	Y52B11A.4
WBGene00013132	strd-1
WBGene00013136	Y53C10A.5
WBGene00013160	Y53F4B.13
WBGene00013181	Y53H1B.2
WBGene00013197	ttm-5
WBGene00013273	2019-03-05
WBGene00013275	btb-14
WBGene00013334	nlp-56
WBGene00013354	snx-6
WBGene00013358	abhd-3.1
WBGene00013359	Y60A3A.8
WBGene00013366	Y60A3A.21
WBGene00013382	gcl-1
WBGene00013415	ilcr-1
WBGene00013456	Y67A10A.7
WBGene00013509	Y71A12B.12
WBGene00013534	acr-24
WBGene00013553	Y75B8A.18
WBGene00013559	Y75B8A.28
WBGene00013560	zip-12
WBGene00013562	Y75B8A.32
WBGene00013593	Y87G2A.1
WBGene00013595	atg-4.1
WBGene00013596	nyn-2
WBGene00013633	Y105C5A.8
WBGene00013638	Y105C5A.14
WBGene00013639	Y105C5A.15
WBGene00013647	Y105C5B.5
WBGene00013682	Y105E8A.25
WBGene00013694	Y106G6A.1
WBGene00013695	epg-8
WBGene00013725	ska-1
WBGene00013763	Y113G7B.14
WBGene00013781	Y116A8B.4
WBGene00013838	fbxa-31
WBGene00013841	fbxa-33
WBGene00013847	cls-3
WBGene00013898	ZC443.3
WBGene00013899	ZC443.4
WBGene00013900	ugt-18
WBGene00013905	ugt-4
WBGene00013917	cdk-11.2
WBGene00013921	best-22
WBGene00013946	ZK228.3
WBGene00013947	ZK228.4
WBGene00013963	sulp-8
WBGene00013975	ZK455.5
WBGene00014000	ZK550.6
WBGene00014001	pyk-2
WBGene00014047	clec-61
WBGene00014096	ZK829.7
WBGene00014097	ZK829.9
WBGene00014109	chpf-1
WBGene00014135	ZK896.4
WBGene00014136	ZK896.5
WBGene00014138	clec-186
WBGene00014140	ZK899.1
WBGene00014152	ZK930.2
WBGene00014164	lact-2
WBGene00014192	nhr-246
WBGene00014194	ZK1037.6
WBGene00014253	ZK1320.3
WBGene00014259	ZK1320.11
WBGene00014294	C53C7.5
WBGene00014307	F07H5.3
WBGene00014666	C05D12.3
WBGene00014732	F09F3.8
WBGene00014734	F11A3.3
WBGene00014746	F27D4.3
WBGene00014905	Y51A2A.2
WBGene00014999	AH9.3
WBGene00015048	faah-2
WBGene00015050	clec-51
WBGene00015052	clec-52
WBGene00015067	B0238.1
WBGene00015076	B0238.12
WBGene00015085	B0244.10
WBGene00015112	B0281.5
WBGene00015128	B0303.7
WBGene00015137	B0310.1
WBGene00015139	B0310.3
WBGene00015141	ugt-46
WBGene00015148	hpo-28
WBGene00015167	B0403.3
WBGene00015171	vang-1
WBGene00015200	B0454.9
WBGene00015217	tes-1
WBGene00015219	B0507.2
WBGene00015235	cdc-26
WBGene00015258	B0554.5
WBGene00015279	C01B10.4
WBGene00015280	C01B10.6
WBGene00015288	best-4
WBGene00015295	acl-12
WBGene00015333	slc-17.3
WBGene00015354	snet-1
WBGene00015362	fbxa-105
WBGene00015369	ugt-51
WBGene00015370	C03A7.12
WBGene00015371	C03A7.13
WBGene00015378	C03B1.7
WBGene00015382	C03B1.14
WBGene00015389	scav-1
WBGene00015393	C03G6.5
WBGene00015423	C04E6.7
WBGene00015424	C04E6.8
WBGene00015431	C04E7.4
WBGene00015433	C04E12.2
WBGene00015441	arrd-21
WBGene00015455	C04G6.5
WBGene00015469	C05D2.8
WBGene00015472	C05D9.3
WBGene00015497	nhr-76
WBGene00015547	ain-1
WBGene00015549	C06G3.3
WBGene00015551	C06G3.5
WBGene00015553	trxr-1
WBGene00015574	irg-1
WBGene00015597	fbxa-162
WBGene00015598	fbxa-163
WBGene00015602	fbxa-158
WBGene00015608	math-3
WBGene00015633	C09D4.2
WBGene00015695	ugt-26
WBGene00015700	asp-9
WBGene00015716	sox-4
WBGene00015742	kxd-1
WBGene00015759	C14C6.5
WBGene00015800	C15H9.4
WBGene00015802	kynu-1
WBGene00015823	C16B8.3
WBGene00015859	C16D9.4
WBGene00015868	C16H3.3
WBGene00015878	C17B7.4
WBGene00015879	C17B7.5
WBGene00015883	C17B7.9
WBGene00015884	C17B7.10
WBGene00015889	C17C3.3
WBGene00015899	C17E7.4
WBGene00015932	C17H12.6
WBGene00015933	C17H12.8
WBGene00015947	C18A11.1
WBGene00015971	swsn-2.2
WBGene00016003	C18H9.5
WBGene00016004	C18H9.6
WBGene00016006	fln-2
WBGene00016013	C23G10.6
WBGene00016023	prmt-6
WBGene00016045	spas-1
WBGene00016063	delm-2
WBGene00016093	srsx-34
WBGene00016097	C25E10.8
WBGene00016114	flp-27
WBGene00016119	C25H3.10
WBGene00016134	C26B9.5
WBGene00016172	C27H5.2
WBGene00016174	C27H5.4
WBGene00016190	C28G1.5
WBGene00016193	C28H8.2
WBGene00016218	pals-23
WBGene00016219	pals-24
WBGene00016265	trhr-1
WBGene00016281	pals-32
WBGene00016283	zmp-3
WBGene00016311	C32D5.3
WBGene00016315	C32D5.7
WBGene00016318	C32D5.11
WBGene00016332	C32F10.4
WBGene00016335	gba-1
WBGene00016367	nhr-162
WBGene00016376	sec-10
WBGene00016379	C33H5.13
WBGene00016407	C34D10.2
WBGene00016415	ampd-1
WBGene00016424	C34H4.1
WBGene00016425	C34H4.2
WBGene00016450	clec-5
WBGene00016456	C35E7.4
WBGene00016457	C35E7.5
WBGene00016458	C35E7.6
WBGene00016474	C36C5.5
WBGene00016481	C36C5.12
WBGene00016486	fbxa-170
WBGene00016500	memo-1
WBGene00016502	C37C3.10
WBGene00016513	C38C3.4
WBGene00016520	C39B5.2
WBGene00016542	C39H7.4
WBGene00016558	pks-1
WBGene00016562	C41D11.3
WBGene00016568	C41G11.1
WBGene00016573	C41H7.3
WBGene00016577	clec-3
WBGene00016599	C42D8.1
WBGene00016628	slc-36.5
WBGene00016634	C44B11.4
WBGene00016684	nlp-43
WBGene00016714	C46F2.1
WBGene00016716	acs-17
WBGene00016717	math-22
WBGene00016719	math-24
WBGene00016748	aexr-3
WBGene00016760	C49A9.6
WBGene00016763	C49A9.9
WBGene00016769	C49C8.5
WBGene00016783	irg-2
WBGene00016785	C49G7.7
WBGene00016822	C50E3.11
WBGene00016846	C50F7.6
WBGene00016863	C52A10.2
WBGene00016865	ets-9
WBGene00016869	C52B9.10
WBGene00016879	cnnm-1
WBGene00016892	C53A3.2
WBGene00016896	nep-4
WBGene00016901	C53C11.4
WBGene00016918	test-1
WBGene00016937	tag-294
WBGene00016958	ilys-4
WBGene00016970	C56E6.2
WBGene00016975	nhr-173
WBGene00016997	cebp-1
WBGene00017041	D2007.1
WBGene00017045	atg-13
WBGene00017046	utx-1
WBGene00017060	D2063.1
WBGene00017071	aagr-1
WBGene00017093	E02C12.8
WBGene00017124	E04F6.4
WBGene00017131	E04F6.15
WBGene00017133	EEED8.2
WBGene00017134	EEED8.3
WBGene00017184	ncam-1
WBGene00017197	F07C3.9
WBGene00017198	nhr-36
WBGene00017226	fbxa-53
WBGene00017263	F08F3.6
WBGene00017274	F08F8.9
WBGene00017298	toca-1
WBGene00017302	F09F7.5
WBGene00017304	F09F7.7
WBGene00017310	F09G2.1
WBGene00017311	F09G2.2
WBGene00017327	F10C1.8
WBGene00017329	ugt-39
WBGene00017332	ugt-37
WBGene00017336	ugt-41
WBGene00017361	F10E9.12
WBGene00017390	F12A10.1
WBGene00017398	slc-17.6
WBGene00017402	F12E12.1
WBGene00017417	F13B6.2
WBGene00017427	acp-5
WBGene00017428	F13D11.3
WBGene00017467	F14F9.4
WBGene00017478	F15A8.6
WBGene00017484	F15E6.3
WBGene00017490	pud-2.1
WBGene00017498	pud-4
WBGene00017499	pud-1.1
WBGene00017501	pud-3
WBGene00017515	F16F9.4
WBGene00017529	F16G10.15
WBGene00017578	drl-1
WBGene00017582	F18G5.6
WBGene00017583	F19B10.1
WBGene00017584	F19B10.2
WBGene00017591	F19C7.1
WBGene00017599	F19F10.3
WBGene00017635	F20D6.5
WBGene00017637	F20D6.8
WBGene00017648	ddo-3
WBGene00017659	F21C10.10
WBGene00017660	F21C10.11
WBGene00017663	F21D12.3
WBGene00017667	ttr-37
WBGene00017671	pgal-1
WBGene00017675	F21F3.6
WBGene00017687	ets-4
WBGene00017698	F22B7.9
WBGene00017724	F22F7.7
WBGene00017726	F22H10.2
WBGene00017727	F22H10.3
WBGene00017730	F22H10.6
WBGene00017735	did-2
WBGene00017756	F23F12.12
WBGene00017764	F25A2.1
WBGene00017771	F25B4.8
WBGene00017778	nono-1
WBGene00017834	F26F12.3
WBGene00017839	F26G1.3
WBGene00017843	F26G5.1
WBGene00017868	slc-28.2
WBGene00017885	dip-2
WBGene00017892	F28B4.3
WBGene00017904	lim-8
WBGene00017907	F28F9.3
WBGene00017908	F28H1.1
WBGene00017929	grld-1
WBGene00017947	mth-2
WBGene00017948	mth-1
WBGene00017951	panl-2
WBGene00017957	F31F4.1
WBGene00017961	nhr-180
WBGene00017964	F31F7.1
WBGene00017979	F32B5.6
WBGene00017986	F32D1.7
WBGene00017990	cec-4
WBGene00017992	F32E10.5
WBGene00018033	F35B3.7
WBGene00018037	chtl-1
WBGene00018052	F35F10.1
WBGene00018061	arrd-19
WBGene00018062	F35F10.13
WBGene00018075	tbc-11
WBGene00018085	ttr-20
WBGene00018100	math-26
WBGene00018101	math-27
WBGene00018146	F37C4.6
WBGene00018153	F37C12.10
WBGene00018184	F38E9.1
WBGene00018194	F39E9.1
WBGene00018216	F40A3.1
WBGene00018221	F40A3.6
WBGene00018225	nep-14
WBGene00018237	irg-7
WBGene00018238	F40F4.7
WBGene00018262	cyp-33C3
WBGene00018268	F41C3.2
WBGene00018294	atg-18
WBGene00018302	F41G3.6
WBGene00018350	ifo-1
WBGene00018353	fbxa-182
WBGene00018374	tag-343
WBGene00018375	F43C9.1
WBGene00018406	F44A2.7
WBGene00018411	F44B9.10
WBGene00018413	cyp-33C4
WBGene00018424	F44E7.2
WBGene00018449	F45D11.2
WBGene00018460	F45D11.15
WBGene00018465	F45E1.4
WBGene00018466	F45E1.5
WBGene00018509	xrep-4
WBGene00018521	F46H5.5
WBGene00018523	lact-1
WBGene00018540	btb-21
WBGene00018564	F47D12.9
WBGene00018581	F48A9.1
WBGene00018590	nlp-37
WBGene00018594	aman-3
WBGene00018601	F48C1.9
WBGene00018602	F48D6.4
WBGene00018607	F48E3.8
WBGene00018643	drd-50
WBGene00018645	F49F1.5
WBGene00018647	F49F1.7
WBGene00018672	sorf-2
WBGene00018689	F52D2.7
WBGene00018700	lmd-3
WBGene00018707	oac-31
WBGene00018718	F52H2.6
WBGene00018724	F53A9.1
WBGene00018725	kreg-1
WBGene00018729	F53A9.6
WBGene00018735	F53B1.2
WBGene00018756	F53C3.13
WBGene00018757	tag-304
WBGene00018758	F53E10.1
WBGene00018760	irg-3
WBGene00018779	F53H8.3
WBGene00018788	shc-1
WBGene00018803	fbxa-24
WBGene00018804	F54D10.3
WBGene00018807	fbxa-146
WBGene00018819	rog-1
WBGene00018865	F55A12.6
WBGene00018874	tag-234
WBGene00018885	drd-5
WBGene00018886	npr-28
WBGene00018910	F56A4.2
WBGene00018921	sago-2
WBGene00018925	F56A11.5
WBGene00018939	fbxa-190
WBGene00018952	F56C9.8
WBGene00018971	clec-67
WBGene00018984	F56F10.1
WBGene00018990	klf-1
WBGene00019014	F57C12.2
WBGene00019018	abts-3
WBGene00019057	F58F9.3
WBGene00019058	F58F9.4
WBGene00019100	F59B1.8
WBGene00019101	F59B1.10
WBGene00019108	chpf-2
WBGene00019116	nhr-143
WBGene00019117	nhr-144
WBGene00019127	cgt-3
WBGene00019130	gbas-1
WBGene00019153	H04M03.3
WBGene00019160	crf-1
WBGene00019176	H10D12.2
WBGene00019181	H10D18.6
WBGene00019185	H10E21.5
WBGene00019187	H11E01.2
WBGene00019205	kcc-2
WBGene00019208	lips-14
WBGene00019211	H18N23.2
WBGene00019213	H20E11.1
WBGene00019214	H20E11.2
WBGene00019215	H20E11.3
WBGene00019225	bgal-2
WBGene00019261	H34I24.2
WBGene00019270	H41C03.3
WBGene00019282	mps-2
WBGene00019300	swt-1
WBGene00019305	snap-29
WBGene00019324	K02F2.5
WBGene00019327	zip-2
WBGene00019329	ceeh-1
WBGene00019351	lron-7
WBGene00019354	K03B4.2
WBGene00019357	cpg-8
WBGene00019365	rei-2
WBGene00019373	K04A8.1
WBGene00019396	K04F10.3
WBGene00019404	K05B2.4
WBGene00019427	atg-16.2
WBGene00019435	K06A9.1
WBGene00019439	K06B9.2
WBGene00019444	frpr-11
WBGene00019464	K07B1.4
WBGene00019466	tos-1
WBGene00019472	cyp-35B1
WBGene00019479	K07C11.7
WBGene00019488	K07D4.9
WBGene00019511	K08A2.1
WBGene00019525	K08D9.4
WBGene00019547	K09C4.1
WBGene00019549	K09C4.4
WBGene00019580	oac-58
WBGene00019584	set-12
WBGene00019589	K09F6.6
WBGene00019593	K09F6.10
WBGene00019595	K09H9.2
WBGene00019601	K09H11.4
WBGene00019603	K09H11.6
WBGene00019619	asp-14
WBGene00019628	pup-2
WBGene00019644	cpt-4
WBGene00019649	K11D12.9
WBGene00019659	K11H12.3
WBGene00019660	K11H12.4
WBGene00019697	M01B12.4
WBGene00019713	pqn-52
WBGene00019717	trx-3
WBGene00019719	M01H9.3
WBGene00019720	M01H9.4
WBGene00019726	bris-1
WBGene00019728	M02D8.2
WBGene00019730	asns-2
WBGene00019731	M02D8.5
WBGene00019733	M02E1.1
WBGene00019738	clec-265
WBGene00019744	M02H5.8
WBGene00019747	ipla-1
WBGene00019748	atg-2
WBGene00019771	M04F3.5
WBGene00019779	endu-2
WBGene00019844	abts-4
WBGene00019871	R04E5.8
WBGene00019872	R04E5.9
WBGene00019895	aagr-2
WBGene00019915	tbc-10
WBGene00019922	fbxc-28
WBGene00019931	R07C12.1
WBGene00019932	R07C12.2
WBGene00019938	R07E4.5
WBGene00019944	R07G3.8
WBGene00019947	htz-1
WBGene00019957	R08E3.1
WBGene00019965	R08F11.1
WBGene00019971	ergo-1
WBGene00019987	R09F10.3
WBGene00019993	rbx-2
WBGene00019998	R10H1.1
WBGene00020007	R11F4.1
WBGene00020016	lipl-3
WBGene00020030	R12E2.1
WBGene00020051	R13A5.9
WBGene00020075	math-35
WBGene00020080	math-37
WBGene00020082	gcp-2.1
WBGene00020126	flp-26
WBGene00020135	aakg-4
WBGene00020139	T01B11.2
WBGene00020142	aak-2
WBGene00020143	T01C8.2
WBGene00020153	nhr-212
WBGene00020157	T02B11.6
WBGene00020195	T03G6.3
WBGene00020200	T04A6.1
WBGene00020208	T04C4.1
WBGene00020218	T04G9.7
WBGene00020224	T05A7.7
WBGene00020229	T05A8.3
WBGene00020230	nep-2
WBGene00020242	phat-5
WBGene00020251	camt-1
WBGene00020280	T06A1.5
WBGene00020315	T07E3.4
WBGene00020317	pdf-1
WBGene00020324	T07F12.4
WBGene00020326	math-38
WBGene00020329	bath-26
WBGene00020334	epg-7
WBGene00020358	math-39
WBGene00020359	math-40
WBGene00020393	T10B5.7
WBGene00020401	T10B11.5
WBGene00020427	sav-1
WBGene00020436	T12A2.1
WBGene00020448	fbxa-51
WBGene00020455	fbxa-59
WBGene00020456	fbxa-60
WBGene00020458	fbxa-70
WBGene00020481	T13C2.6
WBGene00020504	svh-2
WBGene00020509	hex-1
WBGene00020530	T15B12.1
WBGene00020575	T19D7.7
WBGene00020577	T19D12.2
WBGene00020579	T19D12.4
WBGene00020583	T19D12.9
WBGene00020609	T20D4.3
WBGene00020619	T20D4.13
WBGene00020649	sma-10
WBGene00020662	T21H3.1
WBGene00020697	T22F3.7
WBGene00020698	T22F3.8
WBGene00020701	T22F7.1
WBGene00020703	T22F7.4
WBGene00020721	T23B12.6
WBGene00020725	cnp-3
WBGene00020758	T24C4.2
WBGene00020760	T24C4.4
WBGene00020774	T24E12.5
WBGene00020783	blos-4
WBGene00020801	T25D10.4
WBGene00020830	T26C11.4
WBGene00020832	T26C12.2
WBGene00020834	T27A1.2
WBGene00020854	T27C4.1
WBGene00020859	bath-25
WBGene00020881	T28A11.19
WBGene00020884	T28B4.1
WBGene00020903	acd-5
WBGene00020906	T28H11.8
WBGene00020908	VC5.2
WBGene00020909	W01A11.1
WBGene00020917	W01B11.6
WBGene00020930	hlh-30
WBGene00020938	clec-218
WBGene00020972	trpl-2
WBGene00020981	W03D2.6
WBGene00021002	W03F9.4
WBGene00021019	W04B5.2
WBGene00021020	W04B5.3
WBGene00021048	W05H9.1
WBGene00021049	W05H9.2
WBGene00021051	W05H9.4
WBGene00021068	W06H8.6
WBGene00021121	W09G12.7
WBGene00021135	W10G11.2
WBGene00021136	W10G11.3
WBGene00021157	Y4C6B.3
WBGene00021186	Y9D1A.1
WBGene00021187	Y9D1A.2
WBGene00021197	Y17G9A.4
WBGene00021208	Y18H1A.2
WBGene00021215	Y18H1A.11
WBGene00021235	Y19D10B.6
WBGene00021236	pud-1.2
WBGene00021247	Y22D7AL.9
WBGene00021252	cht-4
WBGene00021253	Y22D7AL.15
WBGene00021260	Y22D7AR.6
WBGene00021262	fbxa-74
WBGene00021268	capa-1
WBGene00021305	zig-11
WBGene00021320	Y34B4A.4
WBGene00021322	Y34B4A.6
WBGene00021325	Y34B4A.9
WBGene00021338	Y34F4.3
WBGene00021340	Y34F4.5
WBGene00021349	arl-13
WBGene00021368	best-20
WBGene00021374	Y37E11B.1
WBGene00021391	smut-1
WBGene00021397	Y38C1AA.6
WBGene00021435	Y39A3A.4
WBGene00021448	Y39D8A.1
WBGene00021464	ugt-31
WBGene00021469	Y39G10AR.11
WBGene00021482	Y39H10A.6
WBGene00021491	comt-4
WBGene00021493	Y40B10A.9
WBGene00021495	sqst-2
WBGene00021509	Y41D4A.7
WBGene00021510	frpr-19
WBGene00021517	Y41D4B.15
WBGene00021518	hpo-6
WBGene00021520	Y41D4B.18
WBGene00021522	nhr-274
WBGene00021528	gbb-1
WBGene00021531	Y42G9A.1
WBGene00021533	Y42G9A.3
WBGene00021535	wht-7
WBGene00021539	Y42H9AR.4
WBGene00021581	clec-70
WBGene00021589	Y46D2A.1
WBGene00021590	Y46D2A.2
WBGene00021607	Y46H3C.7
WBGene00021619	Y47D7A.6
WBGene00021620	Y47D7A.7
WBGene00021635	Y47G6A.5
WBGene00021637	Y47G6A.7
WBGene00021702	Y48G9A.9
WBGene00021703	cpt-3
WBGene00021709	ugt-29
WBGene00021721	Y49F6B.9
WBGene00021780	scl-17
WBGene00021798	Y52E8A.6
WBGene00021805	Y53G8AM.5
WBGene00021811	ral-1
WBGene00021818	Y53G8B.2
WBGene00021860	fbxa-9
WBGene00021862	fbxa-48
WBGene00021872	clec-85
WBGene00021879	clec-83
WBGene00021890	Y54G2A.26
WBGene00021893	ndnf-1
WBGene00021894	Y54G2A.32
WBGene00021895	clec-84
WBGene00021909	Y55B1BL.1
WBGene00021956	Y57E12AL.1
WBGene00021986	Y59C2A.3
WBGene00022037	acs-13
WBGene00022047	Y66H1A.5
WBGene00022074	Y69A2AR.1
WBGene00022076	daao-1
WBGene00022078	epg-9
WBGene00022083	Y69A2AR.12
WBGene00022115	Y71F9AL.10
WBGene00022124	supr-1
WBGene00022139	tub-2
WBGene00022141	chaf-2
WBGene00022142	Y71G12B.2
WBGene00022144	pghm-1
WBGene00022167	Y71H2AM.2
WBGene00022181	pho-9
WBGene00022196	gpa-17
WBGene00022206	Y73B3A.4
WBGene00022245	acp-6
WBGene00022246	acp-7
WBGene00022271	cpx-1
WBGene00022306	hxk-3
WBGene00022307	Y77E11A.2
WBGene00022326	fbxa-14
WBGene00022327	fbxa-15
WBGene00022329	fbxa-79
WBGene00022330	fbxa-80
WBGene00022331	fbxa-19
WBGene00022337	pals-16
WBGene00022375	Y94H6A.2
WBGene00022386	Y95B8A.6
WBGene00022412	Y102A11A.2
WBGene00022425	plst-1
WBGene00022427	Y104H12D.3
WBGene00022452	Y110A2AR.1
WBGene00022455	tyms-1
WBGene00022466	Y119C1A.1
WBGene00022488	orc-3
WBGene00022490	Y119D3B.13
WBGene00022497	Y119D3B.21
WBGene00022500	lfi-1
WBGene00022515	ttr-48
WBGene00022538	ZC190.4
WBGene00022561	btb-13
WBGene00022562	ZC204.12
WBGene00022593	ZC328.3
WBGene00022644	dod-19
WBGene00022645	ZK6.11
WBGene00022653	ZK105.1
WBGene00022667	ZK154.5
WBGene00022669	ZK177.1
WBGene00022671	ZK177.3
WBGene00022719	pdhk-2
WBGene00022736	ZK418.7
WBGene00022745	ZK470.2
WBGene00022748	oaz-1
WBGene00022775	ZK616.5
WBGene00022788	slc-17.7
WBGene00022801	pcp-5
WBGene00022823	ZK813.4
WBGene00022848	ZK1055.7
WBGene00022868	ZK1240.3
WBGene00022887	ZK1290.5
WBGene00022893	ZK1290.13
WBGene00023262	C54F6.2
WBGene00023322	K08B12.4
WBGene00023407	cex-1
WBGene00023408	cex-2
WBGene00023417	swm-1
WBGene00023418	R06F6.12
WBGene00023485	ttr-49
WBGene00023498	lin-15A
WBGene00043702	Y54G2A.7
WBGene00044054	C04H5.9
WBGene00044069	hat-1
WBGene00044073	tag-244
WBGene00044121	gcp-2.3
WBGene00044132	C23H4.8
WBGene00044151	W04G3.12
WBGene00044206	T26H5.9
WBGene00044212	Y68A4A.13
WBGene00044241	C53D6.11
WBGene00044280	W02A2.9
WBGene00044332	clec-36
WBGene00044402	Y82E9BL.18
WBGene00044457	C18H7.11
WBGene00044469	clec-173
WBGene00044500	T19E7.6
WBGene00044636	B0393.9
WBGene00044654	fbxa-85
WBGene00044676	fbxa-42
WBGene00044686	flp-28
WBGene00044687	B0563.9
WBGene00044696	F52E1.14
WBGene00044737	ttr-45
WBGene00044783	T26H5.10
WBGene00044792	F59C6.14
WBGene00044898	let-383
WBGene00044903	K03H1.13
WBGene00045195	F53F4.17
WBGene00045212	Y110A7A.21
WBGene00045218	K08C9.8
WBGene00045245	ttr-34
WBGene00045252	Y62H9A.15
WBGene00045336	R11D1.12
WBGene00045405	D1086.18
WBGene00045411	C25F9.11
WBGene00045412	C25F9.12
WBGene00045415	Y43F8B.15
WBGene00045457	F33H12.7
WBGene00045493	F55G7.4
WBGene00045507	F10A3.17
WBGene00050945	C45B11.7
WBGene00077521	maf-1
WBGene00077525	C41G7.8
WBGene00077593	C49G7.12
WBGene00077755	Y40H7A.147
WBGene00077761	zip-9
WBGene00077770	M04D5.3
WBGene00086565	W06G6.17
WBGene00138721	pals-37
WBGene00194674	F23D12.11
WBGene00194695	B0462.5
WBGene00194713	F19B10.13
WBGene00194717	ZC239.22
WBGene00194815	Y43F8B.23
WBGene00194848	T27D12.6
WBGene00195209	C07B5.8
WBGene00206354	F27E5.9
WBGene00206484	C31H2.14
WBGene00219271	F36H5.14
WBGene00219308	W06G6.20
WBGene00219313	C17E4.20
WBGene00219423	C23H5.15
WBGene00235133	T26H5.14
WBGene00235310	R02D1.2
WBGene00255469	C25G4.17
WBGene00269392	F54F7.14
WBGene00269421	R06F6.14
WBGene00271567	T28F4.8

## Sheet: cluster2_genes
genes	symbol
WBGene00000019	abt-1
WBGene00000021	abt-3
WBGene00000023	abt-5
WBGene00000040	aco-1
WBGene00000041	aco-2
WBGene00000064	act-2
WBGene00000079	adr-1
WBGene00000093	agt-1
WBGene00000107	alh-1
WBGene00000114	alh-8
WBGene00000116	alh-10
WBGene00000169	aqp-1
WBGene00000181	ard-1
WBGene00000190	arf-1.1
WBGene00000196	aars-1
WBGene00000197	aars-2
WBGene00000198	art-1
WBGene00000206	asb-1
WBGene00000209	asg-1
WBGene00000229	atp-2
WBGene00000235	baf-1
WBGene00000236	bag-1
WBGene00000248	ben-1
WBGene00000373	cyp-14A5
WBGene00000377	cct-1
WBGene00000378	cct-2
WBGene00000379	cct-4
WBGene00000380	cct-5
WBGene00000381	cct-6
WBGene00000392	cdd-2
WBGene00000466	cel-1
WBGene00000499	chk-2
WBGene00000502	chp-1
WBGene00000535	cpi-1
WBGene00000539	cln-3.1
WBGene00000541	cln-3.3
WBGene00000544	clp-3
WBGene00000546	clp-6
WBGene00000549	cls-2
WBGene00000550	clu-1
WBGene00000567	cnx-1
WBGene00000644	col-68
WBGene00000665	col-90
WBGene00000697	col-123
WBGene00000718	col-145
WBGene00000723	col-150
WBGene00000727	col-154
WBGene00000728	col-155
WBGene00000730	col-157
WBGene00000743	col-170
WBGene00000753	col-180
WBGene00000762	coq-2
WBGene00000765	coq-5
WBGene00000767	coq-8
WBGene00000771	cpb-2
WBGene00000800	cars-1
WBGene00000802	crt-1
WBGene00000820	csp-2
WBGene00000833	cts-1
WBGene00000835	cuc-1
WBGene00000836	cul-1
WBGene00000838	cul-3
WBGene00000854	cux-7
WBGene00000869	cyc-1
WBGene00000877	cyn-1
WBGene00000878	cyn-2
WBGene00000883	cyn-7
WBGene00000915	daf-21
WBGene00000923	daf-31
WBGene00000931	dao-5
WBGene00000933	dap-3
WBGene00000941	ddp-1
WBGene00000975	dhs-12
WBGene00000987	dhs-24
WBGene00000988	dhs-25
WBGene00001001	dis-3
WBGene00001005	dlc-1
WBGene00001019	dnj-1
WBGene00001027	dnj-9
WBGene00001028	dnj-10
WBGene00001029	dnj-11
WBGene00001039	dnj-21
WBGene00001046	dnj-28
WBGene00001057	dpf-4
WBGene00001077	dpy-18
WBGene00001094	dars-1
WBGene00001095	dars-2
WBGene00001151	ech-2
WBGene00001154	ech-5
WBGene00001155	ech-6
WBGene00001156	ech-7
WBGene00001166	eftu-2
WBGene00001168	eef-1A.1
WBGene00001209	egl-45
WBGene00001214	ego-1
WBGene00001226	eif-3.C
WBGene00001227	eif-3.D
WBGene00001228	eif-3.E
WBGene00001229	eif-3.F
WBGene00001230	eif-3.G
WBGene00001231	eif-3.H
WBGene00001232	eif-3.I
WBGene00001233	eif-3.K
WBGene00001240	elo-2
WBGene00001244	elo-6
WBGene00001245	elo-7
WBGene00001246	elo-8
WBGene00001258	emb-4
WBGene00001303	emo-1
WBGene00001337	ears-1
WBGene00001365	exc-4
WBGene00001392	far-8
WBGene00001402	fbf-2
WBGene00001406	fce-2
WBGene00001414	fer-1
WBGene00001423	fib-1
WBGene00001431	fkb-6
WBGene00001477	fmo-2
WBGene00001487	frk-1
WBGene00001497	fars-1
WBGene00001498	fars-3
WBGene00001503	fum-1
WBGene00001566	acdh-13
WBGene00001568	snpc-4
WBGene00001598	glh-1
WBGene00001601	glh-4
WBGene00001602	gln-1
WBGene00001603	gln-2
WBGene00001605	gln-4
WBGene00001635	gly-10
WBGene00001661	gop-2
WBGene00001688	gpr-1
WBGene00001689	gpr-2
WBGene00001744	gars-1
WBGene00001749	gst-1
WBGene00001753	gst-5
WBGene00001757	gst-9
WBGene00001765	gst-17
WBGene00001766	gst-18
WBGene00001768	gst-20
WBGene00001793	gsy-1
WBGene00001808	gut-2
WBGene00001813	haf-3
WBGene00001823	hap-1
WBGene00001840	hel-1
WBGene00001856	hil-5
WBGene00001944	his-70
WBGene00001983	hoe-1
WBGene00001999	hrp-1
WBGene00002001	hars-1
WBGene00002005	hsp-1
WBGene00002010	hsp-6
WBGene00002019	hsp-16.48
WBGene00002025	hsp-60
WBGene00002034	htp-3
WBGene00002045	icd-1
WBGene00002046	icln-1
WBGene00002059	ife-1
WBGene00002063	ife-5
WBGene00002064	iff-1
WBGene00002066	ifg-1
WBGene00002075	imb-1
WBGene00002077	imb-3
WBGene00002078	xpo-1
WBGene00002083	inf-1
WBGene00002152	iars-1
WBGene00002153	iars-2
WBGene00002186	kel-10
WBGene00002191	kin-3
WBGene00002196	kin-10
WBGene00002198	kin-14
WBGene00002204	kin-21
WBGene00002206	kin-24
WBGene00002208	kin-26
WBGene00002212	kin-31
WBGene00002231	knl-1
WBGene00002238	kars-1
WBGene00002244	laf-1
WBGene00002249	lap-1
WBGene00002253	lbp-1
WBGene00002255	lbp-3
WBGene00002256	lbp-4
WBGene00002258	lbp-6
WBGene00002262	ldh-1
WBGene00002263	lea-1
WBGene00002637	let-418
WBGene00002804	let-630
WBGene00002850	let-716
WBGene00002879	let-754
WBGene00002891	let-767
WBGene00003002	lin-13
WBGene00003019	lin-33
WBGene00003047	lis-1
WBGene00003060	lpd-3
WBGene00003062	lpd-6
WBGene00003066	lpl-1
WBGene00003073	lars-1
WBGene00003074	lars-2
WBGene00003077	lsm-3
WBGene00003082	lsm-8
WBGene00003093	lys-4
WBGene00003119	mac-1
WBGene00003123	mag-1
WBGene00003130	map-2
WBGene00003148	mbf-1
WBGene00003162	mdh-2
WBGene00003210	mel-28
WBGene00003258	cogc-1
WBGene00003390	mog-2
WBGene00003407	mrp-1
WBGene00003411	mrp-5
WBGene00003415	mars-1
WBGene00003421	msh-5
WBGene00003424	msp-3
WBGene00003425	msp-10
WBGene00003426	msp-19
WBGene00003429	msp-31
WBGene00003431	msp-33
WBGene00003432	msp-36
WBGene00003434	msp-38
WBGene00003435	msp-40
WBGene00003437	msp-42
WBGene00003438	msp-45
WBGene00003442	msp-49
WBGene00003443	msp-50
WBGene00003449	msp-56
WBGene00003452	msp-59
WBGene00003457	msp-64
WBGene00003460	msp-71
WBGene00003462	msp-74
WBGene00003464	msp-77
WBGene00003467	msp-81
WBGene00003468	msp-113
WBGene00003469	msp-142
WBGene00003470	msp-152
WBGene00003508	mut-16
WBGene00003554	nas-38
WBGene00003562	ncr-2
WBGene00003579	ndx-2
WBGene00003580	ndx-3
WBGene00003592	nfi-1
WBGene00003596	ngp-1
WBGene00003622	nhr-23
WBGene00003658	nhr-68
WBGene00003675	nhr-85
WBGene00003785	nos-3
WBGene00003789	npp-3
WBGene00003791	npp-5
WBGene00003792	npp-6
WBGene00003794	npp-8
WBGene00003795	npp-9
WBGene00003796	npp-10
WBGene00003798	npp-12
WBGene00003799	npp-13
WBGene00003801	npp-15
WBGene00003815	nars-1
WBGene00003829	nud-1
WBGene00003831	nuo-1
WBGene00003836	nxt-1
WBGene00003902	pab-1
WBGene00003904	pabp-2
WBGene00003914	pam-1
WBGene00003920	par-5
WBGene00003922	pas-1
WBGene00003923	pas-2
WBGene00003924	pas-3
WBGene00003925	pas-4
WBGene00003926	pas-5
WBGene00003927	pas-6
WBGene00003928	pas-7
WBGene00003948	pbs-2
WBGene00003949	pbs-3
WBGene00003950	pbs-4
WBGene00003951	pbs-5
WBGene00003952	pbs-6
WBGene00003953	pbs-7
WBGene00003962	pdi-1
WBGene00003964	pdi-3
WBGene00003982	pes-9
WBGene00003989	pfn-1
WBGene00003992	pgl-1
WBGene00003993	pgl-2
WBGene00003994	pgl-3
WBGene00004014	phb-1
WBGene00004015	phb-2
WBGene00004016	phf-5
WBGene00004043	plk-2
WBGene00004046	plp-1
WBGene00004062	pmp-5
WBGene00004084	pph-2
WBGene00004091	pps-1
WBGene00004093	ppw-1
WBGene00004130	ketn-1
WBGene00004170	pqn-90
WBGene00004171	pqn-91
WBGene00004175	pqn-96
WBGene00004178	prg-1
WBGene00004179	prg-2
WBGene00004185	pro-1
WBGene00004187	prp-8
WBGene00004188	prp-21
WBGene00004189	pars-1
WBGene00004190	pars-2
WBGene00004201	prx-19
WBGene00004302	ran-1
WBGene00004304	ran-3
WBGene00004305	ran-4
WBGene00004315	rbd-1
WBGene00004355	rha-1
WBGene00004380	rnf-1
WBGene00004385	rnp-2
WBGene00004408	rla-0
WBGene00004409	rla-1
WBGene00004411	rpc-1
WBGene00004418	rpl-7
WBGene00004421	rpl-10
WBGene00004422	rpl-11.1
WBGene00004426	rpl-14
WBGene00004428	rpl-16
WBGene00004434	rpl-22
WBGene00004435	rpl-23
WBGene00004439	rpl-25.2
WBGene00004441	rpl-27
WBGene00004443	rpl-29
WBGene00004450	rpl-36
WBGene00004452	rpl-38
WBGene00004453	rpl-39
WBGene00004454	rpl-36.A
WBGene00004455	rpl-42
WBGene00004458	rpn-1
WBGene00004459	rpn-2
WBGene00004460	rpn-3
WBGene00004461	rpn-5
WBGene00004462	rpn-6.1
WBGene00004463	rpn-7
WBGene00004464	rpn-8
WBGene00004465	rpn-9
WBGene00004466	rpn-10
WBGene00004467	rpn-11
WBGene00004468	rpn-12
WBGene00004484	rps-15
WBGene00004489	rps-20
WBGene00004492	rps-23
WBGene00004493	rps-24
WBGene00004497	rps-28
WBGene00004501	rpt-1
WBGene00004502	rpt-2
WBGene00004503	rpt-3
WBGene00004504	rpt-4
WBGene00004505	rpt-5
WBGene00004506	rpt-6
WBGene00004679	rars-1
WBGene00004723	sap-49
WBGene00004787	sft-1
WBGene00004808	skr-2
WBGene00004888	smo-1
WBGene00004895	smu-1
WBGene00004899	snb-5
WBGene00004901	snf-2
WBGene00004903	snf-4
WBGene00004904	snf-5
WBGene00004906	snf-7
WBGene00004914	snr-1
WBGene00004915	snr-2
WBGene00004917	snr-4
WBGene00004918	snr-5
WBGene00004919	snr-6
WBGene00004920	snr-7
WBGene00004931	sod-2
WBGene00004946	sop-3
WBGene00004955	spd-5
WBGene00004958	spe-4
WBGene00004960	spe-6
WBGene00004962	spe-8
WBGene00004964	spe-10
WBGene00004965	spe-11
WBGene00004971	spe-17
WBGene00004972	spe-26
WBGene00004973	spe-27
WBGene00004976	spe-41
WBGene00004978	spg-7
WBGene00004989	spp-4
WBGene00005003	spp-18
WBGene00005012	F26F4.2
WBGene00005013	jmjd-1.1
WBGene00005663	sars-1
WBGene00006038	ssp-9
WBGene00006039	ssp-10
WBGene00006040	ssp-11
WBGene00006044	ssp-16
WBGene00006049	ssp-32
WBGene00006051	ssq-2
WBGene00006058	sst-20
WBGene00006061	stl-1
WBGene00006307	suf-1
WBGene00006359	swp-1
WBGene00006383	taf-2
WBGene00006404	tag-10
WBGene00006409	hdl-2
WBGene00006416	sams-5
WBGene00006430	tag-51
WBGene00006447	tag-72
WBGene00006449	alg-4
WBGene00006463	nduf-2.2
WBGene00006476	rhgf-2
WBGene00006481	plrg-1
WBGene00006489	zhit-3
WBGene00006497	tag-151
WBGene00006509	tag-164
WBGene00006510	mtrr-1
WBGene00006512	abcf-1
WBGene00006515	txdc-9
WBGene00006518	bckd-1B
WBGene00006528	tba-1
WBGene00006536	tbb-1
WBGene00006539	tbb-6
WBGene00006553	tbx-34
WBGene00006566	tgt-1
WBGene00006567	tgt-2
WBGene00006572	tin-9.1
WBGene00006573	tin-10
WBGene00006574	tin-13
WBGene00006590	toc-1
WBGene00006613	trm-1
WBGene00006617	tars-1
WBGene00006624	try-6
WBGene00006625	try-7
WBGene00006626	tsn-1
WBGene00006644	tsp-18
WBGene00006645	tsp-19
WBGene00006661	twk-6
WBGene00006679	twk-26
WBGene00006704	ubc-7
WBGene00006706	ubc-9
WBGene00006708	ubc-13
WBGene00006713	ubc-18
WBGene00006715	ubc-20
WBGene00006719	ubc-24
WBGene00006723	ubh-3
WBGene00006724	ubh-4
WBGene00006734	ufd-2
WBGene00006740	ulp-5
WBGene00006781	unc-45
WBGene00006829	unc-101
WBGene00006840	unc-116
WBGene00006856	usp-14
WBGene00006863	gyg-1
WBGene00006886	vap-1
WBGene00006888	vbh-1
WBGene00006889	pfd-3
WBGene00006897	ver-4
WBGene00006924	vig-1
WBGene00006935	vars-1
WBGene00006936	glp-4
WBGene00006937	wah-1
WBGene00006945	wars-1
WBGene00006964	xrn-2
WBGene00007000	tufm-1
WBGene00007001	tufm-2
WBGene00007045	tag-189
WBGene00007050	utp-20
WBGene00007060	wht-6
WBGene00007081	AH6.3
WBGene00007082	acs-10
WBGene00007099	trx-2
WBGene00007101	B0024.11
WBGene00007108	gspd-1
WBGene00007111	sart-3
WBGene00007113	B0035.15
WBGene00007117	spe-42
WBGene00007122	B0250.5
WBGene00007145	B0334.5
WBGene00007156	B0379.2
WBGene00007165	B0391.10
WBGene00007169	B0393.4
WBGene00007190	rmd-3
WBGene00007192	B0491.5
WBGene00007194	B0491.7
WBGene00007195	thoc-7
WBGene00007197	B0513.5
WBGene00007201	exos-4.1
WBGene00007209	BE10.1
WBGene00007215	oxa-1
WBGene00007222	C01F6.2
WBGene00007223	C01F6.9
WBGene00007230	C01G10.1
WBGene00007235	C01G10.8
WBGene00007239	C01G10.14
WBGene00007248	catp-4
WBGene00007249	C01G12.9
WBGene00007299	C04F12.5
WBGene00007300	C04F12.6
WBGene00007305	C04G2.2
WBGene00007306	C04G2.5
WBGene00007307	spch-1
WBGene00007308	C04G2.9
WBGene00007312	C04H5.1
WBGene00007320	C05B5.2
WBGene00007352	cdc-48.1
WBGene00007354	C06A1.3
WBGene00007355	rpb-6
WBGene00007386	C06H2.2
WBGene00007413	pro-2
WBGene00007422	ugt-17
WBGene00007436	C08B11.9
WBGene00007444	C08F8.2
WBGene00007446	mboa-4
WBGene00007448	C08F8.6
WBGene00007449	C08F8.9
WBGene00007457	C08F11.10
WBGene00007461	C08F11.14
WBGene00007489	C09G5.7
WBGene00007503	C09H10.9
WBGene00007514	catp-8
WBGene00007515	C10C6.7
WBGene00007549	spin-1
WBGene00007564	mrps-22
WBGene00007578	C14B1.7
WBGene00007587	mma-1
WBGene00007588	C14C10.5
WBGene00007591	zipt-13
WBGene00007597	C15A11.2
WBGene00007605	asp-10
WBGene00007610	C15H7.3
WBGene00007615	set-31
WBGene00007616	rpoa-12
WBGene00007617	rrbs-1
WBGene00007623	C16C10.2
WBGene00007628	C16C10.8
WBGene00007630	har-1
WBGene00007631	wht-3
WBGene00007633	C16D2.1
WBGene00007639	C17D12.5
WBGene00007641	C17E4.1
WBGene00007653	cysl-1
WBGene00007681	C18D11.3
WBGene00007684	C18E9.4
WBGene00007686	tomm-40
WBGene00007688	C18E9.8
WBGene00007696	tram-1
WBGene00007708	nola-3
WBGene00007712	mrpl-34
WBGene00007718	otub-1
WBGene00007731	C25G4.3
WBGene00007733	smz-1
WBGene00007734	C25G4.7
WBGene00007735	C25G4.8
WBGene00007760	C27B7.2
WBGene00007762	C27B7.5
WBGene00007777	C27D8.1
WBGene00007784	ruvb-1
WBGene00007787	C27H6.8
WBGene00007791	C28A5.6
WBGene00007793	C28D4.5
WBGene00007824	dlat-2
WBGene00007859	mrps-31
WBGene00007863	C32C4.3
WBGene00007885	ugt-21
WBGene00007888	ttr-9
WBGene00007917	C34C6.4
WBGene00007918	sphk-1
WBGene00007922	pph-6
WBGene00007927	C34C12.8
WBGene00007969	acs-19
WBGene00007977	gska-3
WBGene00007980	C36E8.1
WBGene00007987	C36H8.1
WBGene00007998	C38C6.5
WBGene00008001	C38C10.3
WBGene00008028	scl-6
WBGene00008038	C40H1.2
WBGene00008043	C40H1.8
WBGene00008053	cdc-48.2
WBGene00008062	set-32
WBGene00008074	nkb-2
WBGene00008107	aspm-1
WBGene00008124	C47A4.3
WBGene00008125	C47A4.5
WBGene00008127	ddo-1
WBGene00008129	C47A10.12
WBGene00008131	C47B2.2
WBGene00008137	sfxn-1.4
WBGene00008141	C47E8.1
WBGene00008148	C47E12.3
WBGene00008149	pyp-1
WBGene00008151	C47E12.7
WBGene00008153	C47E12.10
WBGene00008154	C47E12.11
WBGene00008155	C47E12.12
WBGene00008164	C47G2.3
WBGene00008169	C48B4.6
WBGene00008173	C48B4.10
WBGene00008176	C48B4.13
WBGene00008185	best-10
WBGene00008186	best-11
WBGene00008220	C50B6.7
WBGene00008230	pfk-1.2
WBGene00008272	C53B4.2
WBGene00008290	bgnt-1.8
WBGene00008298	C54D10.3
WBGene00008299	C54D10.4
WBGene00008312	C54G4.2
WBGene00008332	C55A6.3
WBGene00008333	C55A6.4
WBGene00008338	pafo-1
WBGene00008344	C56A3.5
WBGene00008360	nspc-19
WBGene00008379	secs-1
WBGene00008383	D1081.5
WBGene00008384	D1081.6
WBGene00008386	cdc-5L
WBGene00008399	D2005.4
WBGene00008400	drh-3
WBGene00008405	ttll-12
WBGene00008408	D2023.4
WBGene00008409	mpst-1
WBGene00008410	D2023.6
WBGene00008414	D2030.4
WBGene00008422	D2045.2
WBGene00008433	2019-03-02
WBGene00008452	mrps-5
WBGene00008455	E02H1.1
WBGene00008458	E02H1.6
WBGene00008459	mrpl-53
WBGene00008480	eif-2A
WBGene00008487	F01D4.3
WBGene00008498	F01D5.8
WBGene00008502	skih-2
WBGene00008505	F01G4.6
WBGene00008506	tkt-1
WBGene00008508	F01G10.5
WBGene00008514	F02A9.4
WBGene00008529	F02E9.3
WBGene00008532	dpt-1
WBGene00008554	F07C6.3
WBGene00008556	F07D3.3
WBGene00008569	fbxa-101
WBGene00008581	acl-13
WBGene00008621	F09C8.1
WBGene00008623	F09E8.1
WBGene00008649	F10D11.3
WBGene00008650	F10D11.4
WBGene00008651	F10D11.5
WBGene00008658	clec-152
WBGene00008659	clec-151
WBGene00008661	F10G8.1
WBGene00008662	F10G8.2
WBGene00008685	mon-2
WBGene00008688	F11A10.7
WBGene00008724	F13A7.1
WBGene00008740	F13D12.5
WBGene00008754	F13E9.5
WBGene00008768	F13G3.10
WBGene00008769	mrpl-13
WBGene00008781	rpoa-2
WBGene00008801	acp-3
WBGene00008804	acp-4
WBGene00008821	best-12
WBGene00008848	inft-2
WBGene00008854	F15D3.4
WBGene00008857	timm-23
WBGene00008860	romo-1
WBGene00008870	F15H9.1
WBGene00008912	F17C8.7
WBGene00008934	F18C12.3
WBGene00008935	F18C12.4
WBGene00008948	F19B6.1
WBGene00008949	F19B6.3
WBGene00008950	wht-5
WBGene00008990	smgl-1
WBGene00008993	F21A3.3
WBGene00008994	F21A3.4
WBGene00008995	prde-1
WBGene00009002	hint-1
WBGene00009004	pfd-6
WBGene00009013	mrps-33
WBGene00009028	F21H7.2
WBGene00009039	F22B3.8
WBGene00009052	ekl-1
WBGene00009054	F22D6.9
WBGene00009057	cept-1
WBGene00009069	F23A7.4
WBGene00009075	F23B2.7
WBGene00009082	dlat-1
WBGene00009084	F23B12.7
WBGene00009092	tomm-20
WBGene00009101	F25B3.4
WBGene00009110	F25D1.5
WBGene00009115	F25F2.1
WBGene00009125	F25H5.2
WBGene00009128	mrpl-54
WBGene00009143	F26A3.5
WBGene00009149	F26D2.10
WBGene00009178	uggt-2
WBGene00009185	F27C8.5
WBGene00009187	F27D4.1
WBGene00009189	F27D4.4
WBGene00009193	F27E5.3
WBGene00009207	F28C6.8
WBGene00009211	wdr-46
WBGene00009217	spe-45
WBGene00009220	F28D9.4
WBGene00009221	acs-2
WBGene00009224	F28F8.7
WBGene00009239	irld-6
WBGene00009246	gfm-1
WBGene00009249	F29C12.7
WBGene00009250	F29D10.1
WBGene00009256	tut-2
WBGene00009257	F29G6.1
WBGene00009276	F30F8.9
WBGene00009289	exos-7
WBGene00009308	F32A11.3
WBGene00009313	F32B4.2
WBGene00009319	mccc-1
WBGene00009321	F32B6.4
WBGene00009344	F32H2.7
WBGene00009352	F33A8.4
WBGene00009353	sdhd-1
WBGene00009354	F33A8.6
WBGene00009374	F34D10.4
WBGene00009377	F34D10.8
WBGene00009412	F35E2.5
WBGene00009416	F35E2.9
WBGene00009440	idhg-1
WBGene00009446	F35H8.1
WBGene00009453	F36A2.3
WBGene00009458	F36A2.11
WBGene00009459	F36A2.12
WBGene00009460	ubr-5
WBGene00009463	F36D1.4
WBGene00009467	F36D1.8
WBGene00009471	F36D3.5
WBGene00009477	rbpl-1
WBGene00009492	F36H1.3
WBGene00009493	hrg-4
WBGene00009501	F37A8.1
WBGene00009502	F37A8.2
WBGene00009507	mus-101
WBGene00009513	sfxn-1.2
WBGene00009526	clec-169
WBGene00009550	F38H4.6
WBGene00009554	F39B2.3
WBGene00009563	F39H2.3
WBGene00009577	F40F8.4
WBGene00009581	F40F9.3
WBGene00009592	F40F12.3
WBGene00009605	F40G12.10
WBGene00009634	nspc-9
WBGene00009639	nspc-15
WBGene00009640	nspc-10
WBGene00009641	F42G4.2
WBGene00009654	sly-1
WBGene00009670	F43G9.8
WBGene00009682	msd-2
WBGene00009683	F44D12.6
WBGene00009685	F44D12.8
WBGene00009688	F44E5.1
WBGene00009708	F44G3.7
WBGene00009714	F44G4.5
WBGene00009734	F45G2.8
WBGene00009738	hecw-1
WBGene00009739	F45H10.2
WBGene00009745	F45H11.5
WBGene00009753	scrm-6
WBGene00009754	F46A9.1
WBGene00009771	F46B6.6
WBGene00009773	lipl-2
WBGene00009846	F48F5.2
WBGene00009880	F49C12.11
WBGene00009922	F52B5.3
WBGene00009925	F52B11.2
WBGene00009942	F52F12.9
WBGene00009956	F53B2.5
WBGene00009992	F53F4.10
WBGene00009993	F53F4.11
WBGene00009995	F53F4.13
WBGene00010013	F54B3.1
WBGene00010015	atad-3
WBGene00010034	F54B11.11
WBGene00010035	F54C8.1
WBGene00010042	bcs-1
WBGene00010044	F54C9.9
WBGene00010048	F54D5.2
WBGene00010052	F54D5.7
WBGene00010055	F54D5.12
WBGene00010056	smc-6
WBGene00010062	lipl-1
WBGene00010072	F54F12.1
WBGene00010082	F55A11.11
WBGene00010091	ssp-35
WBGene00010092	F55C5.2
WBGene00010094	tsfm-1
WBGene00010097	srpa-68
WBGene00010108	F55C10.4
WBGene00010114	F55D12.6
WBGene00010139	F56A8.3
WBGene00010140	F56A8.4
WBGene00010155	F56F3.4
WBGene00010230	rpac-19
WBGene00010231	F58B3.4
WBGene00010233	F58B3.7
WBGene00010237	scvp-1
WBGene00010241	F58D2.2
WBGene00010246	F58D5.7
WBGene00010254	F58E6.5
WBGene00010256	hrg-3
WBGene00010257	F58E6.8
WBGene00010263	wago-4
WBGene00010265	F58G1.3
WBGene00010271	F58G1.9
WBGene00010274	F58G6.3
WBGene00010279	letm-1
WBGene00010289	F58H1.6
WBGene00010294	fbxa-129
WBGene00010300	F59A1.15
WBGene00010302	F59A2.2
WBGene00010303	cri-3
WBGene00010304	clpf-1
WBGene00010309	rpn-6.2
WBGene00010323	dhhc-12
WBGene00010324	F59C6.3
WBGene00010366	H05L14.1
WBGene00010373	H08M01.1
WBGene00010405	erfa-3
WBGene00010419	H28O16.1
WBGene00010435	JC8.2
WBGene00010437	cox-11
WBGene00010458	mrpl-10
WBGene00010460	clec-142
WBGene00010466	K01D12.7
WBGene00010470	cdr-4
WBGene00010473	hrg-2
WBGene00010478	K01G5.5
WBGene00010479	K01G5.8
WBGene00010485	ant-1.3
WBGene00010487	K02A11.2
WBGene00010509	K02E2.8
WBGene00010510	ent-3
WBGene00010515	K02E11.6
WBGene00010547	K03H1.12
WBGene00010560	eif-2beta
WBGene00010562	cdc-48.3
WBGene00010564	ath-1
WBGene00010582	K05C4.5
WBGene00010608	K07A1.1
WBGene00010611	K07A1.4
WBGene00010616	K07A1.10
WBGene00010624	mrps-15
WBGene00010627	K07C5.4
WBGene00010633	nspd-2
WBGene00010634	K07F5.6
WBGene00010638	K07F5.14
WBGene00010645	fecl-1
WBGene00010650	K08C9.1
WBGene00010677	gtbp-1
WBGene00010679	K08F4.5
WBGene00010682	K08F8.5
WBGene00010712	K09B11.5
WBGene00010725	erv-46
WBGene00010728	K09G1.2
WBGene00010732	K10C3.5
WBGene00010743	K10D6.3
WBGene00010759	cysl-2
WBGene00010763	K10H10.7
WBGene00010766	K11B4.1
WBGene00010769	asah-1
WBGene00010771	K11D2.5
WBGene00010779	K11H3.2
WBGene00010783	mrpl-36
WBGene00010785	top-2
WBGene00010786	K12D12.4
WBGene00010792	K12G11.6
WBGene00010794	dld-1
WBGene00010809	M01F1.3
WBGene00010812	mrpl-35
WBGene00010814	M01F1.8
WBGene00010829	M02B1.4
WBGene00010845	M03C11.8
WBGene00010847	M04B2.4
WBGene00010858	M04C9.3
WBGene00010869	M05B5.1
WBGene00010874	M05D6.1
WBGene00010876	M05D6.3
WBGene00010878	M05D6.5
WBGene00010883	M7.7
WBGene00010890	ddb-1
WBGene00010895	M28.4
WBGene00010896	M28.5
WBGene00010900	M28.9
WBGene00010904	ugt-62
WBGene00010909	cisd-3.1
WBGene00010912	gmps-1
WBGene00010915	M110.7
WBGene00010920	M117.4
WBGene00010922	M142.5
WBGene00010957	nduo-6
WBGene00010959	nduo-1
WBGene00010966	nduo-3
WBGene00010980	R02D5.7
WBGene00010989	R03D7.2
WBGene00010992	R03D7.8
WBGene00010994	lgc-25
WBGene00011008	R04B5.11
WBGene00011015	R04F11.2
WBGene00011017	R04F11.5
WBGene00011026	R05D7.1
WBGene00011027	R05D7.2
WBGene00011032	R05D11.4
WBGene00011033	R05D11.5
WBGene00011043	rbm-28
WBGene00011051	pfs-2
WBGene00011061	wago-1
WBGene00011062	R06C7.2
WBGene00011064	adsl-1
WBGene00011087	R07B7.2
WBGene00011088	kmo-2
WBGene00011110	prdx-3
WBGene00011117	R07E5.11
WBGene00011119	mpc-1
WBGene00011120	R07E5.15
WBGene00011144	R08D7.4
WBGene00011172	R09E10.2
WBGene00011173	acs-18
WBGene00011174	acs-23
WBGene00011178	R09E10.9
WBGene00011191	R10D12.10
WBGene00011200	R10E4.3
WBGene00011214	R10E9.2
WBGene00011236	R11A8.1
WBGene00011239	pges-2
WBGene00011240	R11A8.7
WBGene00011241	mpz-5
WBGene00011244	R11D1.3
WBGene00011247	mrpl-49
WBGene00011260	cnnm-5
WBGene00011268	pde-12
WBGene00011273	R53.4
WBGene00011280	pelo-1
WBGene00011290	R102.3
WBGene00011294	R102.7
WBGene00011305	R186.1
WBGene00011308	pnn-1
WBGene00011309	R186.8
WBGene00011322	irld-14
WBGene00011333	nrde-2
WBGene00011334	mrps-14
WBGene00011338	sec-31
WBGene00011351	T01H3.5
WBGene00011369	T02C12.4
WBGene00011379	T02E1.7
WBGene00011391	mrps-12
WBGene00011401	T03F6.6
WBGene00011405	clec-155
WBGene00011412	mrpl-16
WBGene00011438	T04F3.3
WBGene00011440	sfxn-1.5
WBGene00011464	T05B9.1
WBGene00011466	T05C12.1
WBGene00011467	decr-1.3
WBGene00011478	T05D4.5
WBGene00011481	imp-2
WBGene00011488	nra-2
WBGene00011491	T05F1.5
WBGene00011493	T05F1.8
WBGene00011510	pdha-1
WBGene00011513	fbxa-197
WBGene00011526	cox-15
WBGene00011527	cchl-1
WBGene00011528	T06D8.7
WBGene00011538	T06E6.1
WBGene00011562	sas-7
WBGene00011580	ddx-19
WBGene00011599	T07G12.8
WBGene00011601	zim-3
WBGene00011604	T08A11.1
WBGene00011617	T08G3.4
WBGene00011619	T08G3.7
WBGene00011624	T08G5.3
WBGene00011631	T08G11.4
WBGene00011638	ostb-1
WBGene00011641	T09A5.15
WBGene00011669	T09F5.10
WBGene00011679	ucr-2.2
WBGene00011720	T11G6.5
WBGene00011735	hip-1
WBGene00011740	mrpl-51
WBGene00011748	T13F2.9
WBGene00011749	ssp-36
WBGene00011759	mrps-18B
WBGene00011777	T14G10.8
WBGene00011790	T15H9.5
WBGene00011793	T16A9.3
WBGene00011795	T16A9.5
WBGene00011804	T16G12.3
WBGene00011806	ekl-6
WBGene00011844	T19C9.8
WBGene00011857	T20D3.3
WBGene00011859	T20D3.6
WBGene00011869	dod-6
WBGene00011870	T20G5.8
WBGene00011875	T20G5.14
WBGene00011883	mrpl-50
WBGene00011897	scpl-4
WBGene00011909	T22A3.6
WBGene00011910	alg-3
WBGene00011911	T22B3.3
WBGene00011919	T22C1.9
WBGene00011951	T23F6.3
WBGene00011954	T23F11.2
WBGene00011968	T23G11.1
WBGene00011973	T23G11.10
WBGene00011975	T24B1.1
WBGene00011994	samp-1
WBGene00012010	T25B9.4
WBGene00012011	T25B9.5
WBGene00012012	T25B9.6
WBGene00012015	T25B9.9
WBGene00012030	T25G3.3
WBGene00012037	T26E3.4
WBGene00012059	T26G10.1
WBGene00012087	T27E7.1
WBGene00012094	T27E9.2
WBGene00012110	T28A8.4
WBGene00012111	T28A8.5
WBGene00012115	T28B8.4
WBGene00012120	T28C6.5
WBGene00012126	T28D6.6
WBGene00012138	T28F4.3
WBGene00012166	nuo-6
WBGene00012171	W01B6.4
WBGene00012172	W01B6.5
WBGene00012173	W01B6.6
WBGene00012177	decr-1.2
WBGene00012179	W01D2.1
WBGene00012191	W02A2.8
WBGene00012196	bath-35
WBGene00012207	W02B12.12
WBGene00012223	W03C9.8
WBGene00012234	W04A4.5
WBGene00012236	W04A8.1
WBGene00012237	W04A8.2
WBGene00012249	W04E12.4
WBGene00012250	W04E12.5
WBGene00012276	his-74
WBGene00012294	nspa-8
WBGene00012296	spe-46
WBGene00012297	W06D4.3
WBGene00012315	immt-2
WBGene00012316	ctps-1
WBGene00012342	mtr-4
WBGene00012344	ola-1
WBGene00012345	W08E3.4
WBGene00012357	W09D6.4
WBGene00012360	tat-3
WBGene00012361	mrpl-12
WBGene00012375	mecr-1
WBGene00012376	nduf-7
WBGene00012379	Y1A5A.1
WBGene00012386	agef-1
WBGene00012388	Y6B3B.3
WBGene00012402	sfxn-1.3
WBGene00012460	dhps-1
WBGene00012474	attf-6
WBGene00012479	Y18D10A.9
WBGene00012486	Y18D10A.21
WBGene00012529	Y32F6A.4
WBGene00012535	Y37A1A.2
WBGene00012552	enu-3.5
WBGene00012555	npp-25
WBGene00012562	Y37H2A.1
WBGene00012566	fbxa-211
WBGene00012592	Y38E10A.14
WBGene00012595	Y38E10A.17
WBGene00012600	Y38E10A.22
WBGene00012605	Y38F1A.1
WBGene00012608	hphd-1
WBGene00012609	Y38F1A.7
WBGene00012627	Y38H6C.15
WBGene00012636	Y38H8A.2
WBGene00012637	Y38H8A.3
WBGene00012638	Y38H8A.4
WBGene00012642	Y39A1A.2
WBGene00012645	mrpl-22
WBGene00012652	Y39A1A.14
WBGene00012658	Y39A1A.21
WBGene00012664	Y39B6A.1
WBGene00012665	pph-5
WBGene00012676	pro-3
WBGene00012680	Y39B6A.21
WBGene00012689	Y39B6A.30
WBGene00012692	Y39B6A.33
WBGene00012693	Y39B6A.34
WBGene00012714	abce-1
WBGene00012720	Y39E4B.11
WBGene00012728	Y39G8B.9
WBGene00012730	xrn-1
WBGene00012731	Y39G8C.2
WBGene00012734	Y40B1A.3
WBGene00012738	eif-3.J
WBGene00012741	Y40H4A.2
WBGene00012749	Y41C4A.1
WBGene00012754	Y41C4A.7
WBGene00012761	Y41C4A.18
WBGene00012768	eef-1B.2
WBGene00012781	nspd-7
WBGene00012785	Y43C5B.2
WBGene00012786	Y43C5B.3
WBGene00012809	Y43F8A.2
WBGene00012827	Y43F8C.5
WBGene00012830	mrps-28
WBGene00012845	set-24
WBGene00012858	Y44F5A.1
WBGene00012864	Y45F3A.9
WBGene00012870	Y45F10B.2
WBGene00012871	Y45F10B.3
WBGene00012887	Y45F10D.7
WBGene00012896	snrp-200
WBGene00012905	Y46G5A.14
WBGene00012908	Y46G5A.18
WBGene00012912	Y46G5A.22
WBGene00012925	wht-8
WBGene00012926	Y47D3A.13
WBGene00012932	Y47D3A.21
WBGene00012933	mib-1
WBGene00012964	Y48A6B.3
WBGene00012973	spat-2
WBGene00012978	Y48B6A.1
WBGene00012979	Y48B6A.5
WBGene00012999	rpoa-1
WBGene00013001	Y48E1B.2
WBGene00013004	mrpl-37
WBGene00013017	Y48E1C.4
WBGene00013021	Y48G10A.4
WBGene00013029	glrx-5
WBGene00013033	Y49E10.10
WBGene00013036	fbxa-218
WBGene00013037	Y49E10.18
WBGene00013049	Y50E8A.6
WBGene00013068	Y51A2B.4
WBGene00013075	Y51A2D.7
WBGene00013087	Y51B9A.5
WBGene00013131	Y52B11C.1
WBGene00013142	Y53C12A.7
WBGene00013143	Y53C12B.1
WBGene00013148	Y53F4A.2
WBGene00013158	Y53F4B.11
WBGene00013165	Y53F4B.19
WBGene00013168	arp-1
WBGene00013170	Y53F4B.24
WBGene00013186	Y53H1C.3
WBGene00013189	Y54E2A.4
WBGene00013192	Y54E2A.7
WBGene00013198	Y54E5A.2
WBGene00013210	Y54G9A.7
WBGene00013213	Y54G11A.2
WBGene00013214	Y54G11A.3
WBGene00013216	Y54G11A.7
WBGene00013217	ddl-3
WBGene00013237	Y56A3A.19
WBGene00013246	Y57A10A.1
WBGene00013247	Y57A10A.2
WBGene00013249	Y57A10A.4
WBGene00013250	Y57A10A.5
WBGene00013251	Y57A10A.6
WBGene00013252	Y57A10A.7
WBGene00013267	Y57A10A.27
WBGene00013279	Y57A10B.7
WBGene00013290	Y57G11A.2
WBGene00013296	Y57G11B.3
WBGene00013297	Y57G11B.5
WBGene00013299	irld-18
WBGene00013304	Y57G11C.6
WBGene00013308	nuo-3
WBGene00013310	Y57G11C.14
WBGene00013311	sec-61
WBGene00013318	Y57G11C.23
WBGene00013324	mrps-7
WBGene00013343	prp-6
WBGene00013347	nova-1
WBGene00013348	fbxa-106
WBGene00013357	clec-260
WBGene00013361	fars-2
WBGene00013362	algn-7
WBGene00013373	Y62E10A.2
WBGene00013374	Y62E10A.3
WBGene00013376	Y62E10A.6
WBGene00013388	Y62F5A.10
WBGene00013422	Y66A7A.2
WBGene00013424	Y66A7A.4
WBGene00013434	Y66D12A.8
WBGene00013435	Y66D12A.9
WBGene00013442	Y66D12A.16
WBGene00013445	Y66D12A.19
WBGene00013449	Y67A6A.1
WBGene00013452	Y67A10A.3
WBGene00013459	Y67A10A.10
WBGene00013461	Y67H2A.2
WBGene00013473	Y69E1A.1
WBGene00013474	Y69E1A.2
WBGene00013478	Y69E1A.8
WBGene00013495	clec-236
WBGene00013506	usp-3
WBGene00013514	Y73F4A.1
WBGene00013521	Y73F8A.12
WBGene00013523	Y73F8A.14
WBGene00013524	Y73F8A.15
WBGene00013526	Y73F8A.20
WBGene00013529	Y73F8A.24
WBGene00013544	Y75B8A.7
WBGene00013549	Y75B8A.13
WBGene00013550	Y75B8A.14
WBGene00013556	Y75B8A.23
WBGene00013590	Y81G3A.1
WBGene00013591	gcn-2
WBGene00013597	gpi-1
WBGene00013602	Y87G2A.16
WBGene00013605	Y95D11A.1
WBGene00013606	cand-1
WBGene00013611	Y102A5C.2
WBGene00013612	fbxa-207
WBGene00013644	Y105C5A.25
WBGene00013651	Y105C5B.11
WBGene00013657	Y105C5B.18
WBGene00013668	Y105E8A.3
WBGene00013671	Y105E8A.11
WBGene00013674	Y105E8A.14
WBGene00013677	yars-1
WBGene00013678	Y105E8A.20
WBGene00013684	Y105E8A.27
WBGene00013688	riok-2
WBGene00013712	dlc-6
WBGene00013723	Y106G6H.13
WBGene00013727	Y111B2A.1
WBGene00013728	Y111B2A.2
WBGene00013729	Y111B2A.3
WBGene00013735	Y111B2A.12
WBGene00013738	elpc-2
WBGene00013740	hut-1
WBGene00013742	sas-1
WBGene00013765	cdkr-3
WBGene00013766	prmt-1
WBGene00013771	Y113G7C.1
WBGene00013776	Y116A8A.6
WBGene00013804	Y116A8C.27
WBGene00013805	bca-2
WBGene00013810	Y116A8C.37
WBGene00013811	Y116A8C.38
WBGene00013823	Y116F11B.7
WBGene00013826	Y116F11B.10
WBGene00013854	cyc-2.2
WBGene00013880	mppb-1
WBGene00013886	ZC412.5
WBGene00013893	ZC434.7
WBGene00013894	ZC434.8
WBGene00013901	ugt-16
WBGene00013920	pssy-1
WBGene00013924	rad-23
WBGene00013925	ZK20.4
WBGene00013958	ZK265.6
WBGene00013978	ZK507.1
WBGene00013979	ZK507.3
WBGene00013983	ZK512.2
WBGene00013988	ZK512.10
WBGene00013997	ZK550.3
WBGene00013999	ZK550.5
WBGene00014022	ZK637.2
WBGene00014029	ZK637.12
WBGene00014048	ZK666.8
WBGene00014054	dbt-1
WBGene00014062	ZK673.6
WBGene00014078	ZK792.5
WBGene00014082	ZK795.2
WBGene00014083	ZK795.3
WBGene00014085	ZK809.1
WBGene00014086	ZK809.3
WBGene00014095	gdh-1
WBGene00014100	ZK849.1
WBGene00014102	best-25
WBGene00014111	rpc-25
WBGene00014113	hpo-40
WBGene00014128	ZK892.4
WBGene00014129	ZK892.5
WBGene00014148	ZK909.3
WBGene00014154	ZK930.4
WBGene00014155	ZK930.5
WBGene00014156	ZK930.6
WBGene00014157	ZK930.7
WBGene00014165	puf-12
WBGene00014168	ZK945.6
WBGene00014174	ZK970.8
WBGene00014176	ZK1010.2
WBGene00014179	ZK1010.5
WBGene00014182	ZK1025.2
WBGene00014183	ZK1025.3
WBGene00014184	ZK1025.4
WBGene00014185	ZK1025.5
WBGene00014186	nhr-244
WBGene00014197	ZK1053.2
WBGene00014201	ZK1053.6
WBGene00014204	ccdc-47
WBGene00014208	ZK1067.2
WBGene00014223	ZK1098.6
WBGene00014224	mrps-23
WBGene00014229	ZK1128.3
WBGene00014241	ZK1251.3
WBGene00014243	dcaf-1
WBGene00014246	ZK1307.3
WBGene00014247	ZK1307.4
WBGene00014375	F44D12.11
WBGene00014576	Y43F11A.6
WBGene00014665	C04G2.3
WBGene00014703	C47A4.4
WBGene00014728	E03A3.1
WBGene00014755	F40F12.8
WBGene00014772	F56D5.4
WBGene00014777	F58A4.12
WBGene00014813	M176.9
WBGene00014852	W02A11.6
WBGene00014857	W08D2.9
WBGene00014861	Y6B3B.2
WBGene00014915	Y53C10A.1
WBGene00014938	mdt-9
WBGene00014965	Y106G6D.5
WBGene00014992	ZK1025.1
WBGene00014994	ZK1225.7
WBGene00014996	ZK1251.5
WBGene00015004	B0034.4
WBGene00015006	B0041.1
WBGene00015021	B0205.6
WBGene00015024	B0205.10
WBGene00015025	mrpl-9
WBGene00015026	B0207.1
WBGene00015030	B0207.7
WBGene00015032	B0207.9
WBGene00015051	B0218.7
WBGene00015075	B0238.11
WBGene00015084	B0244.9
WBGene00015089	B0252.5
WBGene00015092	mrpl-47
WBGene00015094	B0261.6
WBGene00015097	B0273.1
WBGene00015099	ggtb-1
WBGene00015101	rpia-1
WBGene00015104	B0280.9
WBGene00015133	mrpl-11
WBGene00015160	B0361.6
WBGene00015165	B0361.11
WBGene00015185	mrpl-41
WBGene00015186	misc-1
WBGene00015210	B0496.1
WBGene00015229	fbxa-125
WBGene00015230	tag-344
WBGene00015243	B0524.4
WBGene00015246	scl-23
WBGene00015266	BE0003N10.1
WBGene00015282	C01B10.8
WBGene00015287	osta-1
WBGene00015297	sco-1
WBGene00015306	C01G5.4
WBGene00015308	ddi-1
WBGene00015313	hpo-32
WBGene00015326	ivd-1
WBGene00015348	C02F5.5
WBGene00015360	C02G6.2
WBGene00015386	C03B8.3
WBGene00015392	nspc-7
WBGene00015403	clec-10
WBGene00015405	C03H5.3
WBGene00015413	pdhb-1
WBGene00015421	C04E6.4
WBGene00015422	C04E6.5
WBGene00015425	C04E6.11
WBGene00015453	C04G6.2
WBGene00015456	C04G6.6
WBGene00015461	C05C8.2
WBGene00015481	C05D11.1
WBGene00015486	C05D11.9
WBGene00015487	mrps-17
WBGene00015499	inst-1
WBGene00015504	C06A5.6
WBGene00015511	C06A6.7
WBGene00015516	C06A8.6
WBGene00015525	rha-2
WBGene00015538	sams-3
WBGene00015557	C06G4.1
WBGene00015558	C06G4.4
WBGene00015573	C07G1.7
WBGene00015593	C08E3.1
WBGene00015616	C08G5.3
WBGene00015627	C09B9.2
WBGene00015629	C09B9.4
WBGene00015630	C09B9.7
WBGene00015634	C09D4.3
WBGene00015641	C09E7.7
WBGene00015642	C09E7.8
WBGene00015682	C10G8.3
WBGene00015685	C10G11.1
WBGene00015686	C10G11.6
WBGene00015687	chdp-1
WBGene00015755	C14B9.10
WBGene00015765	C14C11.1
WBGene00015778	got-2.2
WBGene00015816	C16A11.3
WBGene00015817	C16A11.4
WBGene00015818	C16A11.5
WBGene00015820	C16A11.7
WBGene00015828	math-14
WBGene00015855	C16C8.18
WBGene00015860	C16D9.5
WBGene00015916	C17G10.2
WBGene00015917	C17G10.3
WBGene00015920	eif-3.L
WBGene00015929	C17H12.3
WBGene00015931	C17H12.5
WBGene00015941	C18A3.3
WBGene00015944	C18A3.7
WBGene00015970	C18E3.1
WBGene00015974	snrp-40.2
WBGene00015982	bgnt-1.4
WBGene00015987	C18G1.9
WBGene00015988	C18H2.1
WBGene00015990	C18H2.3
WBGene00015991	C18H2.4
WBGene00015994	C18H7.4
WBGene00015997	C18H7.7
WBGene00016010	C23G10.1
WBGene00016014	C23G10.7
WBGene00016015	C23G10.8
WBGene00016021	C23H3.5
WBGene00016027	C23H5.8
WBGene00016040	C24A11.1
WBGene00016053	C24D10.1
WBGene00016058	nspd-3
WBGene00016073	C24H12.4
WBGene00016083	C25A8.2
WBGene00016117	C25H3.8
WBGene00016118	C25H3.9
WBGene00016120	C25H3.11
WBGene00016125	C26B2.2
WBGene00016129	C26B2.7
WBGene00016139	ntl-9
WBGene00016140	rpb-2
WBGene00016142	mrps-18C
WBGene00016148	C26F1.3
WBGene00016161	C27D6.3
WBGene00016166	C27F2.4
WBGene00016177	C28C12.1
WBGene00016181	C28C12.11
WBGene00016183	C28F5.1
WBGene00016194	C28H8.3
WBGene00016204	gsto-1
WBGene00016209	C29E4.12
WBGene00016211	sdz-3
WBGene00016212	C29F5.3
WBGene00016236	cec-9
WBGene00016249	mrpl-32
WBGene00016250	hsp-110
WBGene00016277	C30G12.6
WBGene00016286	C31H1.1
WBGene00016287	C31H1.2
WBGene00016312	C32D5.4
WBGene00016326	ubr-1
WBGene00016327	C32E12.1
WBGene00016333	C32F10.8
WBGene00016336	C33C12.4
WBGene00016356	C33F10.8
WBGene00016357	C33F10.11
WBGene00016358	C33F10.12
WBGene00016362	C33G8.4
WBGene00016382	C33H5.16
WBGene00016389	C34B2.4
WBGene00016390	C34B2.5
WBGene00016391	lonp-1
WBGene00016392	sdha-2
WBGene00016393	C34B2.8
WBGene00016395	C34B2.10
WBGene00016398	C34D4.2
WBGene00016399	C34D4.3
WBGene00016408	prmt-5
WBGene00016411	C34E10.10
WBGene00016412	mrps-26
WBGene00016413	C34F11.1
WBGene00016414	C34F11.2
WBGene00016416	C34F11.5
WBGene00016420	C34G6.3
WBGene00016440	gipc-1
WBGene00016441	C35D10.3
WBGene00016442	C35D10.5
WBGene00016445	C35D10.8
WBGene00016447	msd-4
WBGene00016461	C35E7.9
WBGene00016462	C35E7.10
WBGene00016491	acdh-5
WBGene00016507	abhd-5.2
WBGene00016508	C37H5.5
WBGene00016512	C38C3.3
WBGene00016516	C38C3.8
WBGene00016541	C39H7.1
WBGene00016587	C42C1.9
WBGene00016607	C43E11.9
WBGene00016614	trpp-12
WBGene00016624	C44B7.2
WBGene00016630	acer-1
WBGene00016652	got-2.1
WBGene00016653	C44E4.4
WBGene00016680	C45G9.9
WBGene00016702	C46A5.6
WBGene00016707	C46E10.1
WBGene00016730	C46H11.6
WBGene00016739	pitr-1
WBGene00016740	C48B6.2
WBGene00016742	C48B6.4
WBGene00016746	C48B6.10
WBGene00016753	oac-9
WBGene00016765	C49C8.1
WBGene00016773	oac-10
WBGene00016781	C49G7.3
WBGene00016782	phat-3
WBGene00016790	C49H3.3
WBGene00016800	C50C3.2
WBGene00016807	C50D2.3
WBGene00016825	C50E10.1
WBGene00016826	C50E10.2
WBGene00016839	C50F2.5
WBGene00016843	C50F7.3
WBGene00016844	sucg-1
WBGene00016860	cyp-33C9
WBGene00016862	C52A10.1
WBGene00016890	lst-5
WBGene00016902	C53D5.1
WBGene00016907	C53H9.2
WBGene00016942	C55B7.3
WBGene00016943	acdh-1
WBGene00016946	C55B7.10
WBGene00016950	C55C2.4
WBGene00016954	C55C3.4
WBGene00016963	C56C10.6
WBGene00016977	akap-1
WBGene00016978	C56G2.3
WBGene00016981	rpn-13
WBGene00016989	CD4.3
WBGene00016993	CD4.8
WBGene00017003	D1007.5
WBGene00017004	nrd-1
WBGene00017026	ipla-4
WBGene00017028	dex-1
WBGene00017035	D1065.3
WBGene00017050	D2024.1
WBGene00017056	D2062.4
WBGene00017057	D2062.5
WBGene00017058	msrp-6
WBGene00017059	msrp-5
WBGene00017069	timm-17B.2
WBGene00017075	nap-1
WBGene00017078	D2096.11
WBGene00017103	klo-2
WBGene00017112	E03H12.5
WBGene00017114	E03H12.7
WBGene00017119	timm-17B.1
WBGene00017172	F02C9.1
WBGene00017175	irld-3
WBGene00017179	wht-4
WBGene00017186	F07B7.2
WBGene00017211	fbxb-36
WBGene00017213	F07E5.8
WBGene00017215	F07F6.1
WBGene00017217	F07F6.4
WBGene00017271	F08F8.6
WBGene00017279	F09C12.8
WBGene00017286	F09E5.8
WBGene00017288	F09E5.10
WBGene00017300	rpc-2
WBGene00017301	hach-1
WBGene00017319	mrps-9
WBGene00017325	F10C1.3
WBGene00017344	F10E7.2
WBGene00017348	F10E7.6
WBGene00017354	F10E9.2
WBGene00017356	F10E9.4
WBGene00017376	F11C7.2
WBGene00017384	F11G11.4
WBGene00017386	nspd-5
WBGene00017387	mpst-4
WBGene00017391	F12A10.2
WBGene00017392	basl-2
WBGene00017393	nep-5
WBGene00017435	F13H8.2
WBGene00017441	F13H8.8
WBGene00017444	F13H8.12
WBGene00017462	F14D2.14
WBGene00017482	set-9
WBGene00017542	F17E9.5
WBGene00017545	F18A1.1
WBGene00017550	nep-6
WBGene00017552	nep-7
WBGene00017553	nep-8
WBGene00017554	nep-9
WBGene00017555	nep-10
WBGene00017567	F18E3.11
WBGene00017595	F19C7.5
WBGene00017605	F19F10.9
WBGene00017647	F20H11.4
WBGene00017672	F21F3.2
WBGene00017679	F21F8.5
WBGene00017680	F21F8.6
WBGene00017681	slc-17.5
WBGene00017686	tpp-2
WBGene00017691	ilys-5
WBGene00017717	F22F4.4
WBGene00017734	F23C8.5
WBGene00017738	tipn-1
WBGene00017743	F23F1.2
WBGene00017749	rpoa-49
WBGene00017750	F23F1.10
WBGene00017758	F23H11.2
WBGene00017759	sucl-2
WBGene00017763	crls-1
WBGene00017765	gcst-1
WBGene00017769	hmgs-1
WBGene00017797	symk-1
WBGene00017799	F25G6.8
WBGene00017800	F25G6.9
WBGene00017802	F26A1.3
WBGene00017803	F26A1.4
WBGene00017808	nspd-9
WBGene00017816	hrpk-1
WBGene00017829	F26F4.9
WBGene00017830	rpb-8
WBGene00017841	F26G1.5
WBGene00017849	F27B3.7
WBGene00017853	F27C1.3
WBGene00017869	F28A10.1
WBGene00017874	acdh-9
WBGene00017889	F28B3.10
WBGene00017902	F28E10.4
WBGene00017920	jmjd-1.2
WBGene00017922	F29B9.7
WBGene00017924	mrps-21
WBGene00017934	F30B5.4
WBGene00017955	F31E8.5
WBGene00017975	F32B5.1
WBGene00017982	hpo-18
WBGene00017988	fipp-1
WBGene00017989	nol-10
WBGene00017997	mrpl-1
WBGene00017999	emc-6
WBGene00018000	F33D11.1
WBGene00018001	F33D11.2
WBGene00018004	F33D11.7
WBGene00018007	F33D11.10
WBGene00018046	F35D11.5
WBGene00018071	F35H10.6
WBGene00018082	F36A4.3
WBGene00018119	F36H12.3
WBGene00018120	F36H12.4
WBGene00018121	F36H12.5
WBGene00018122	ttbk-2
WBGene00018123	F36H12.9
WBGene00018124	F36H12.10
WBGene00018127	F36H12.14
WBGene00018134	F37A4.4
WBGene00018135	F37A4.5
WBGene00018138	folt-2
WBGene00018143	oac-23
WBGene00018151	F37C12.3
WBGene00018154	exos-9
WBGene00018156	ncbp-1
WBGene00018158	comp-1
WBGene00018159	F37F2.2
WBGene00018168	irld-7
WBGene00018178	F38E1.3
WBGene00018196	nep-13
WBGene00018206	ugt-61
WBGene00018232	F40E3.5
WBGene00018235	F40E12.2
WBGene00018240	cox-17
WBGene00018253	F40H6.1
WBGene00018261	cyp-33C5
WBGene00018305	exos-8
WBGene00018316	F41H10.3
WBGene00018318	F41H10.5
WBGene00018332	F42A9.3
WBGene00018335	F42A9.6
WBGene00018336	F42A9.7
WBGene00018339	abcf-3
WBGene00018341	F42A10.5
WBGene00018351	F42G2.2
WBGene00018352	fbxc-20
WBGene00018359	F42G8.8
WBGene00018362	F42G9.1
WBGene00018393	msra-1
WBGene00018395	mtch-1
WBGene00018398	sptl-2
WBGene00018400	F43H9.4
WBGene00018422	F44E2.9
WBGene00018426	F44E7.4
WBGene00018427	F44E7.5
WBGene00018428	fbxa-183
WBGene00018471	F45E4.6
WBGene00018475	mrpl-14
WBGene00018481	F45F2.9
WBGene00018498	F46F5.7
WBGene00018502	F46F5.11
WBGene00018513	F46F11.10
WBGene00018525	F47B3.1
WBGene00018528	F47B3.4
WBGene00018548	clec-79
WBGene00018563	F47D12.7
WBGene00018575	clec-119
WBGene00018580	F47G6.3
WBGene00018598	F48C1.5
WBGene00018599	F48C1.6
WBGene00018612	disl-2
WBGene00018627	F49D11.3
WBGene00018630	F49D11.6
WBGene00018636	F49E8.2
WBGene00018652	F49F1.12
WBGene00018659	F52C6.2
WBGene00018679	F52C12.2
WBGene00018681	denn-4
WBGene00018745	F53C3.1
WBGene00018765	mpc-2
WBGene00018769	mnat-1
WBGene00018782	cct-3
WBGene00018783	cbs-2
WBGene00018784	F54A3.5
WBGene00018792	F54C1.8
WBGene00018835	F54F2.7
WBGene00018841	F54H5.5
WBGene00018852	F55A3.7
WBGene00018853	sec-22
WBGene00018862	wago-2
WBGene00018863	F55A12.2
WBGene00018866	nath-10
WBGene00018877	aman-1
WBGene00018890	F55F8.2
WBGene00018891	F55F8.3
WBGene00018893	wdr-12
WBGene00018895	F55F8.7
WBGene00018898	F55F10.1
WBGene00018900	rod-1
WBGene00018901	F55G1.5
WBGene00018926	F56A11.6
WBGene00018930	F56B3.6
WBGene00018932	mrpl-2
WBGene00018934	F56B3.11
WBGene00018935	skr-18
WBGene00018949	acbp-4
WBGene00018961	mrps-16
WBGene00018963	ucr-1
WBGene00018967	ddx-15
WBGene00018975	F56E10.1
WBGene00018981	F56F4.4
WBGene00018994	F56H1.3
WBGene00018999	F57B9.8
WBGene00019002	F57B10.4
WBGene00019015	F57F4.1
WBGene00019024	F58A6.5
WBGene00019026	F58A6.9
WBGene00019062	F58F12.2
WBGene00019076	mrpl-24
WBGene00019081	F59A3.8
WBGene00019086	F59A6.4
WBGene00019105	asp-8
WBGene00019119	F59E12.3
WBGene00019121	npl-4.2
WBGene00019126	sam-4
WBGene00019133	F59H6.2
WBGene00019134	F59H6.3
WBGene00019142	btb-4
WBGene00019150	H04J21.1
WBGene00019151	pck-3
WBGene00019157	H05C05.1
WBGene00019162	eif-1.A
WBGene00019165	mpz-4
WBGene00019168	H06I04.3
WBGene00019169	H06I04.5
WBGene00019190	H12I13.1
WBGene00019209	emc-1
WBGene00019216	H20J04.1
WBGene00019219	H20J04.4
WBGene00019220	pfd-2
WBGene00019245	sacy-1
WBGene00019246	rpb-5
WBGene00019255	H32C10.1
WBGene00019257	dhhc-13
WBGene00019259	H34C03.2
WBGene00019264	H35B03.2
WBGene00019275	rpac-40
WBGene00019322	ahcy-1
WBGene00019323	teg-4
WBGene00019334	K02F3.12
WBGene00019337	K02F6.3
WBGene00019341	K02F6.7
WBGene00019380	K04C2.2
WBGene00019401	nuo-4
WBGene00019405	K05F1.1
WBGene00019406	acdh-8
WBGene00019409	K05F1.8
WBGene00019425	K06A1.2
WBGene00019431	K06A5.3
WBGene00019433	acdh-3
WBGene00019461	K07A3.3
WBGene00019495	sdz-24
WBGene00019498	K07E8.7
WBGene00019501	K07E12.2
WBGene00019506	K07H8.5
WBGene00019510	K07H8.10
WBGene00019515	ugt-19
WBGene00019530	scrm-8
WBGene00019543	cif-1
WBGene00019556	K09C6.2
WBGene00019561	K09C6.7
WBGene00019562	K09C6.8
WBGene00019563	K09C6.9
WBGene00019568	K09D9.11
WBGene00019586	K09F6.3
WBGene00019598	K09H9.7
WBGene00019605	ctsa-1
WBGene00019626	K10C9.7
WBGene00019642	K11C4.1
WBGene00019658	K11H12.1
WBGene00019664	K11H12.8
WBGene00019667	K12B6.2
WBGene00019678	K12H4.3
WBGene00019680	K12H4.5
WBGene00019692	M01A10.1
WBGene00019759	M03F4.6
WBGene00019762	M03F8.3
WBGene00019769	M04F3.3
WBGene00019773	M04G7.2
WBGene00019785	M70.3
WBGene00019800	mtss-1
WBGene00019810	R01H2.2
WBGene00019812	R01H2.4
WBGene00019819	R02D3.1
WBGene00019830	hrg-1
WBGene00019836	R02F2.7
WBGene00019838	R02F2.9
WBGene00019878	R05D3.3
WBGene00019879	R05D3.5
WBGene00019893	sgt-1
WBGene00019900	vdac-1
WBGene00019912	R06B10.1
WBGene00019913	R06B10.2
WBGene00019920	acs-15
WBGene00019941	pgam-5
WBGene00019949	R08C7.5
WBGene00019950	clec-175
WBGene00019951	R08C7.8
WBGene00019972	R09A1.2
WBGene00019978	hacd-1
WBGene00019983	sti-1
WBGene00019997	R10F2.6
WBGene00020003	R11E3.1
WBGene00020022	gldc-1
WBGene00020037	mrps-6
WBGene00020042	R13A1.3
WBGene00020053	R13A5.11
WBGene00020054	R13D7.2
WBGene00020068	cra-1
WBGene00020070	rmd-6
WBGene00020072	R13H9.6
WBGene00020088	R119.2
WBGene00020089	R119.3
WBGene00020098	R144.10
WBGene00020099	R144.11
WBGene00020110	hsp-75
WBGene00020112	pfd-5
WBGene00020116	moa-1
WBGene00020117	R155.3
WBGene00020128	R193.2
WBGene00020140	ant-1.4
WBGene00020164	T02G5.4
WBGene00020166	T02G5.7
WBGene00020177	T02H6.7
WBGene00020184	uba-5
WBGene00020187	gsp-4
WBGene00020190	guk-1
WBGene00020223	T05A7.6
WBGene00020237	phat-4
WBGene00020256	T05C3.6
WBGene00020263	let-355
WBGene00020264	acl-8
WBGene00020269	erfa-1
WBGene00020273	T05H4.10
WBGene00020275	atp-4
WBGene00020282	mps-3
WBGene00020284	mel-46
WBGene00020287	lsy-13
WBGene00020292	nep-19
WBGene00020293	nep-20
WBGene00020296	T07A9.8
WBGene00020311	T07D3.9
WBGene00020342	fbxa-201
WBGene00020348	mrpl-23
WBGene00020349	T08B2.11
WBGene00020353	T08B6.4
WBGene00020370	T08H10.3
WBGene00020377	T09B4.3
WBGene00020380	T09B4.6
WBGene00020383	tin-44
WBGene00020391	cct-7
WBGene00020400	T10B11.4
WBGene00020403	T10B11.7
WBGene00020414	T10E9.4
WBGene00020417	nuo-2
WBGene00020422	T10F2.2
WBGene00020423	prp-19
WBGene00020463	cec-6
WBGene00020464	T12E12.3
WBGene00020467	T12F5.2
WBGene00020497	T14A8.2
WBGene00020498	T14B4.1
WBGene00020499	T14B4.2
WBGene00020517	hpo-8
WBGene00020526	T15B7.14
WBGene00020531	T15B12.2
WBGene00020533	T16A1.2
WBGene00020534	fbxc-49
WBGene00020549	nmt-1
WBGene00020563	T19C3.5
WBGene00020580	T19D12.5
WBGene00020589	T19H12.3
WBGene00020592	ugt-12
WBGene00020598	T20B6.2
WBGene00020600	trd-1
WBGene00020601	T20B12.3
WBGene00020613	T20D4.7
WBGene00020625	mrrf-1
WBGene00020627	T20F5.5
WBGene00020629	T20F5.7
WBGene00020636	T20H4.5
WBGene00020642	T20H9.6
WBGene00020655	T21E12.3
WBGene00020661	smz-2
WBGene00020679	ogdh-1
WBGene00020683	ribo-1
WBGene00020687	ruvb-2
WBGene00020705	T22H9.1
WBGene00020713	T23B3.5
WBGene00020715	nspd-4
WBGene00020717	mrpl-4
WBGene00020718	mrps-2
WBGene00020742	T23H2.3
WBGene00020757	ucr-2.3
WBGene00020781	T24H7.2
WBGene00020796	mrpl-28
WBGene00020802	btb-2
WBGene00020821	jhdm-1
WBGene00020839	usp-5
WBGene00020841	T27A3.5
WBGene00020862	fip-2
WBGene00020864	oac-50
WBGene00020868	eif-1
WBGene00020894	T28D9.1
WBGene00020898	T28D9.9
WBGene00020905	T28H11.7
WBGene00020914	sulp-6
WBGene00020915	nol-5
WBGene00020940	W02D7.4
WBGene00020950	dlst-1
WBGene00020973	W03B1.3
WBGene00020984	W03D8.1
WBGene00020986	W03D8.3
WBGene00020990	W03D8.9
WBGene00020991	W03D8.10
WBGene00020992	W03F8.2
WBGene00020999	W03F9.1
WBGene00021001	W03F9.3
WBGene00021004	sftb-2
WBGene00021006	dct-9
WBGene00021007	W03F11.4
WBGene00021010	W03G1.2
WBGene00021016	W03G9.5
WBGene00021021	mrpl-30
WBGene00021034	enu-3.4
WBGene00021037	fbxa-203
WBGene00021053	gadr-4
WBGene00021055	W06A11.4
WBGene00021070	cpr-8
WBGene00021073	nol-1
WBGene00021074	W07E6.2
WBGene00021078	unc-132
WBGene00021082	zip-11
WBGene00021088	W08E12.7
WBGene00021097	cdc-37
WBGene00021110	W09C3.2
WBGene00021128	W10C8.5
WBGene00021133	tomm-22
WBGene00021151	Y4C6A.1
WBGene00021154	Y4C6A.4
WBGene00021192	Y14H12B.2
WBGene00021248	Y22D7AL.10
WBGene00021271	spe-47
WBGene00021276	Y23H5B.5
WBGene00021277	Y23H5B.6
WBGene00021281	ell-1
[truncated: 326 more rows]

## Sheet: cluster3_genes
genes	symbol
WBGene00000024	abu-1
WBGene00000601	col-12
WBGene00000602	col-13
WBGene00000641	col-65
WBGene00000663	col-88
WBGene00000692	col-118
WBGene00000707	col-133
WBGene00000717	col-144
WBGene00000725	col-152
WBGene00000865	cyb-1
WBGene00000875	cyk-4
WBGene00001596	gld-2
WBGene00001695	grd-6
WBGene00001703	grd-14
WBGene00002032	htp-1
WBGene00002162	isp-1
WBGene00003742	nlp-4
WBGene00004138	pqn-53
WBGene00004139	pqn-54
WBGene00004156	pqn-74
WBGene00006951	wrt-5
WBGene00006957	wsp-1
WBGene00008036	C40C9.3
WBGene00008061	C41G7.3
WBGene00009113	maph-1.2
WBGene00009364	F33H1.3
WBGene00009451	cids-2
WBGene00009948	F52H3.6
WBGene00011978	T24B8.4
WBGene00012253	clec-50
WBGene00012319	ipla-3
WBGene00013069	Y51A2B.5
WBGene00013220	ctl-3
WBGene00013887	nspa-5
WBGene00014007	ZK596.2
WBGene00014178	ZK1010.4
WBGene00016146	C26F1.1
WBGene00016322	C32E8.4
WBGene00016589	C42C1.11
WBGene00016915	C54D2.1
WBGene00017073	D2096.6
WBGene00017827	F26F4.5
WBGene00017923	F29B9.8
WBGene00017981	figl-1
WBGene00018099	ztf-28
WBGene00018292	F41E6.11
WBGene00018314	F41H10.1
WBGene00018840	F54H5.3
WBGene00020421	T10E10.4
WBGene00020461	T12C9.7
WBGene00021887	fbxc-45
WBGene00021928	Y55F3AM.11
WBGene00022072	cpg-9
WBGene00022222	Y73B3A.21
WBGene00022789	lron-2
WBGene00044011	T06E4.12
WBGene00044569	C25F6.8
WBGene00045062	Y38H8A.8
WBGene00255375	F08B4.8

## Sheet: cluster4_genes
genes	symbol
WBGene00000462	ceh-41
WBGene00000485	che-3
WBGene00000799	crn-6
WBGene00000819	csp-1
WBGene00000882	cyn-6
WBGene00000920	daf-28
WBGene00001335	F35A5.8
WBGene00001433	fkb-8
WBGene00001583	gfi-3
WBGene00001786	gst-38
WBGene00002089	ins-6
WBGene00002109	ins-26
WBGene00002113	ins-30
WBGene00003175	mec-12
WBGene00003629	nhr-38
WBGene00003681	nhr-91
WBGene00003841	ocr-4
WBGene00003892	osm-12
WBGene00004747	sdc-3
WBGene00004810	skr-4
WBGene00004811	skr-5
WBGene00005444	srh-237
WBGene00006414	raga-1
WBGene00006418	tag-38
WBGene00006592	dpy-31
WBGene00006831	unc-104
WBGene00007309	C04G2.10
WBGene00007314	gcy-29
WBGene00007376	C06C3.5
WBGene00007788	C28A5.1
WBGene00007875	dod-24
WBGene00008010	C38D9.2
WBGene00008575	scl-24
WBGene00008598	spin-3
WBGene00008862	F15D4.5
WBGene00008894	F16H6.4
WBGene00009247	bath-45
WBGene00009361	F33E2.5
WBGene00009518	clec-166
WBGene00009678	magu-4
WBGene00009812	suca-1
WBGene00009838	fbxa-187
WBGene00009849	F48F7.3
WBGene00010123	F55G11.2
WBGene00010262	droe-4
WBGene00010507	K02E2.6
WBGene00010659	K08D8.5
WBGene00010702	usp-33
WBGene00010754	K10G4.5
WBGene00011486	T05E12.3
WBGene00011676	cyp-13A2
WBGene00011974	xbx-5
WBGene00012228	W03H9.2
WBGene00012373	W09H1.3
WBGene00012374	W09H1.4
WBGene00012421	Y9C2UA.1
WBGene00012492	fbxb-7
WBGene00012532	crp-1
WBGene00012597	nhr-235
WBGene00012943	bed-2
WBGene00013215	Y54G11A.4
WBGene00013480	egas-3
WBGene00013520	best-21
WBGene00013614	clec-237
WBGene00013685	Y105E8A.28
WBGene00013820	Y116F11B.2
WBGene00013868	ZC373.3
WBGene00014021	svop-1
WBGene00014884	Y39E4B.14
WBGene00014944	Y68A4A.12
WBGene00015012	bath-20
WBGene00015268	BE0003N10.3
WBGene00015492	lnp-1
WBGene00016029	elf-1
WBGene00016885	fbxb-97
WBGene00016985	C56G3.2
WBGene00017199	clec-45
WBGene00017201	grsp-4
WBGene00017322	clec-160
WBGene00017350	F10E7.9
WBGene00017782	F25E5.1
WBGene00017900	F28E10.1
WBGene00017962	fbxa-72
WBGene00018195	btb-16
WBGene00018543	ugt-32
WBGene00019074	cpd-1
WBGene00019536	rpi-2
WBGene00019924	fbxc-33
WBGene00020245	T05B11.1
WBGene00020451	fbxa-11
WBGene00020527	T15B7.15
WBGene00020882	T28A11.20
WBGene00020883	fbxa-64
WBGene00020988	W03D8.7
WBGene00021526	Y41G9A.2
WBGene00021585	clec-74
WBGene00021673	Y48G1BM.8
WBGene00021834	mab-31
WBGene00021963	lipl-6
WBGene00022130	Y71F9B.9
WBGene00022205	Y73B3A.3
WBGene00045416	Y37H2A.14
WBGene00195165	F57G4.11
WBGene00206415	F59H6.14
WBGene00206464	F59C6.18
WBGene00206509	Y102A5C.43
WBGene00206512	Y39A3B.7
