# Supplementary material for: Neuronal TORC1 modulates longevity via AMPK and cell nonautonomous regulation of mitochondrial dynamics in C. elegans
Source: eLife journal article supplement (doi:10.7554/elife.49158), 2019-08-14
Supplement: supp [file elife-49158-supp-v1.zip › elife_poa_e49158_Supplemental_file_3.pdf]

The scatter plot displays the relationship between the number of people in a household (x-axis) and the number of people in a household who are 65 years of age or older (y-axis). The x-axis ranges from 0 to 10, and the y-axis ranges from 0 to 10. Data points are colored by the number of people in the household: red for 1 person, orange for 2 people, yellow for 3 people, green for 4 people, blue for 5 people, and purple for 6 or more people. The plot shows a positive correlation between the number of people in a household and the number of people aged 65 or older.

● 0.05  
 ● 0.10  
 ● 0.15  
 ● 0.20  
 ● 0.25
