# Supplementary material for: Neuronal TORC1 modulates longevity via AMPK and cell nonautonomous regulation of mitochondrial dynamics in C. elegans
Source: eLife journal article supplement (doi:10.7554/elife.49158), 2019-08-14
Supplement: supp [file elife-49158-supp-v1.zip › elife_poa_e49158_Supplemental_file_4.xlsx]

## Sheet: Strains
Supplemental table: worm strains
Strain name	Genotype	Transgene type (if applicable)	Source
N2			CGC
VC222	raga-1(ok386) II.		CGC
RB754	aak-2(ok524) X.		CGC
WBM131	aak-2(ok524) X.		Backcrossed RB754 to N2 6 times
WBM997	aak-2(wbm20) X.		AAK-2 (T243A) mutant generated by CRISPR
WBM499	raga-1(ok386) II.		Backcrossed VC222 to N2 6 times
WBM511	raga-1(ok386) II; aak-2(ok524) X.		Crossed WBM499 and WBM131
WBM1075	raga-1(ok386) II; aak-2(wbm20) X.		Crossed WBM499 and WBM997
KK300	par-4(it57) V.		CGC
WBM132	wbmEx49 [rab-3p::crtc-1(S76A, S179A)::tdTomato::unc-54 UTR]	Extrachromosomal arrays	(Burkewitz et al., 2015)
WBM776	raga-1(ok386) II; wbmEx49 [rab-3p::crtc-1(S76A, S179A)::tdTomato::unc-54 UTR]	Extrachromosomal arrays	Crossed WBM132 to WBM499
WBM29	wbmEx9 [sur-5p::aak-2 cDNA (aa1-321)::unc-54 3'UTR, rol-6 (su1006)]	Extrachromosomal arrays	Microinjection: 50 ng/μl pYZ1 and 50 ng/μl pRF4 to N2
WBM244	aak-2(ok524) X; wbmEx9 [sur-5p::aak-2 cDNA (aa1-321)::unc-54 3'UTR, rol-6 (su1006)]	Extrachromosomal arrays	Crossed WBM29 and WBM131
WBM182	wbmEx67 [gly-19p::aak-2 (aa1-321 cDNA)::tdTomato::unc-54 3'UTR]	Extrachromosomal arrays	(Burkewitz et al., 2015)
WBM242	aak-2(ok524) X; wbmEx67[gly-19p::aak-2 (aa1-321 cDNA)::tdTomato::unc-54 3'UTR]	Extrachromosomal arrays	Crossed WBM182 and WBM131
WBM183	wbmEx68[myo-3p::aak-2 (aa1-321 cDNA)::tdTomato::unc-54 3'UTR]	Extrachromosomal arrays	(Burkewitz et al., 2015)
WBM243	aak-2(ok524) X; wbmEx68[myo-3p::aak-2 (aa1-321 cDNA)::tdTomato::unc-54 3'UTR]	Extrachromosomal arrays	Crossed WBM183 and WBM131
WBM181	wbmEx66[rab-3p::aak-2 (aa1-321 cDNA)::tdTomato::unc-54 3'UTR]	Extrachromosomal arrays	(Burkewitz et al., 2015)
WBM245	aak-2(ok524) X; wbmEx66[rab-3p::aak-2 (aa1-321 cDNA)::tdTomato::unc-54 3'UTR]	Extrachromosomal arrays	Crossed WBM181 and WBM131
WBM185	wbmEx70 [aak-2p::aak-2 genomic DNA::3X FLAG::unc-54 3'UTR, myo-3p::mCherry::unc-54 3'UTR]	Extrachromosomal arrays	Microinjection: 50 ng/μl pYZ11 (aak-2 genomic DNA) and 50 ng/μl pCFJ104 (myo-3::mCherry)
WBM290	aak-2(ok524) X; wbmEx70 [aak-2p::aak-2 genomic DNA::3X FLAG::unc-54 3'UTR, myo-3p::mCherry::unc-54 3'UTR]	Extrachromosomal arrays	Crossed WBM185 and WBM131
WBM190	wbmEx75 [aak-2p::aak-2 gDNA S551A::3X FLAG::unc-54 3'UTR, myo-3p::mCherry::unc-54 3'UTR]	Extrachromosomal arrays	Microinjection: 50 ng/μl pYZ12 (aak-2 genomic DNA S551A) and 50 ng/μl pCFJ104 (myo-3::mCherry)
WBM291	aak-2(ok524) X; wbmEx75 [aak-2p::aak-2 gDNA S551A::3X FLAG::unc-54 3'UTR, myo-3p::mCherry::unc-54 3'UTR]	Extrachromosomal arrays	Crossed WBM190 and WBM131
WBM191	wbmEx76[Paak-2::aak-2 gDNA S551A::3X FLAG::unc-54 3'UTR, Pmyo-3::mCherry::unc-54 3'UTR]	Extrachromosomal arrays	Microinjection: 50 ng/μl pYZ12 (aak-2 genomic DNA S551A) and 50 ng/μl pCFJ104 (myo-3::mCherry)
WBM192	wbmEx77[Paak-2::aak-2 gDNA S551A::3X FLAG::unc-54 3'UTR, Pmyo-3::mCherry::unc-54 3'UTR]	Extrachromosomal arrays	Microinjection: 50 ng/μl pYZ12 (aak-2 genomic DNA S551A) and 50 ng/μl pCFJ104 (myo-3::mCherry)
WBM193	wbmEx78[Paak-2::aak-2 gDNA S551A::3X FLAG::unc-54 3'UTR, Pmyo-3::mCherry::unc-54 3'UTR]	Extrachromosomal arrays	Microinjection: 50 ng/μl pYZ12 (aak-2 genomic DNA S551A) and 50 ng/μl pCFJ104 (myo-3::mCherry)
WBM194	wbmEx79[Paak-2::aak-2 gDNA S551A::3X FLAG::unc-54 3'UTR, Pmyo-3::mCherry::unc-54 3'UTR]	Extrachromosomal arrays	Microinjection: 50 ng/μl pYZ12 (aak-2 genomic DNA S551A) and 50 ng/μl pCFJ104 (myo-3::mCherry)
YB941	aak-1 (tm1944) III; aak-2 (ok524) X; Ex[rol-6 (ru1006), Ppgp-1:RFP]	Extrachromosomal arrays	(Fukuyama et al. PMID: 23213370 )
YB969	aak-1 (tm1944) III; aak-2 (ok524) X; Ex[Prgef-1::GFP::aak-2, rol-6 (ru1006), Ppgp-1:RFP]	Extrachromosomal arrays	(Fukuyama et al. PMID: 23213370 )
WBM536	wbmEx238[rab-3p::raga-1 cDNA::SL2::mCherry::unc-54 3'UTR]	Extrachromosomal arrays	Microinjection: 50 ng/μl pYZ30 to N2
WBM549	raga-1(ok386) II; wbmEx238 [rab-3p::raga-1 cDNA::SL2::mCherry::unc-54 3'UTR]	Extrachromosomal arrays	Crossed WBM536 and WBM499
RB1206	rsks-1(ok1255) III.		CGC
WBM740	rsks-1(ok1255) III.		Backcrossed RB1206 to N2 6 times
WBM772	wbmEx333 [rab-3p::rsks-1 cDNA::SL2::mCherry::unc-54 3'UTR]	Extrachromosomal arrays	Microinjection: 50 ng/μl pYZ36
WBM773	wbmEx334 [rab-3p::rsks-1 cDNA::SL2::mCherry::unc-54 3'UTR]	Extrachromosomal arrays	Microinjection: 50 ng/μl pYZ36
WBM784	rsks-1(ok1255) III; wbmEx333 [rab-3p::rsks-1 cDNA::SL2::mCherry::unc-54 3'UTR]	Extrachromosomal arrays	Crossed WBM772 and WBM740
WBM785	rsks-1(ok1255) III; wbmEx334 [rab-3p::rsks-1 cDNA::SL2::mCherry::unc-54 3'UTR]	Extrachromosomal arrays	Crossed WBM773 and WBM740
WBM1143	wbmIs67[eft-3p::3XFLAG::wrmScarlet::unc-54 3'UTR, *wbmIs65]	Single copy insertion	(Silva-García et al. 2019)
WBM1144	wbmIs68[rab-3p::3XFLAG::wrmScarlet::rab-3 3'UTR, *wbmIs66]	Single copy insertion	(Silva-García et al. 2019)
WBM1167	wbmIs79[eft-3p::3XFLAG::raga-1::SL2::wrmScarlet::unc-54 3'UTR, *wbmIs67]	Single copy insertion	Inserted eft-3p::3xflag::raga-1::SL2::scarlet into SKI site in WBM1143; then backcrossed to N2
WBM1168	wbmIs80[rab-3p::3XFLAG::raga-1::SL2::wrmScarlet::rab-3 3'UTR, *wbmIs68]	Single copy insertion	Inserted rab-3p::3xflag::raga-1::SL2::scarlet into SKI site in WBM1144; then backcrossed to N2
WBM1169	raga-1(ok386) II; wbmIs79[eft-3p::3XFLAG::raga-1::SL2::wrmScarlet::unc-54 3'UTR, *wbmIs67]	Single copy insertion	Crossed WBM499 and WBM1167
WBM1170	raga-1(ok386) II; wbmIs80[rab-3p::3XFLAG::raga-1::SL2::wrmScarlet::rab-3 3'UTR, *wbmIs68]	Single copy insertion	Crossed WBM499 and WBM1168
WBM622	raga-1 (ok386) II; wbmEx271 [ges-1p::raga-1 cDNA::SL2::mCherry::unc-54 3'UTR; rol-6 (su1006)]	Extrachromosomal arrays	Microinjection: 50 ng/μl pYZ31 to WBM499
WBM650	wbmEx271 [ges-1p::raga-1 cDNA::SL2::mCherry::unc-54 3'UTR; rol-6 (su1006)]	Extrachromosomal arrays	Crossed WBM622 to N2
CB246	unc-64(e246) III.		CGC
WBM874	unc-64(e246) III.		Backrossed CB246 to N2 6 times
WBM853	raga-1(ok386) II; unc-64(e246) III.		Crossed WBM499 to CB246
WBM868	raga-1(ok386) II; unc-64(e246) III; wbmEx238 [rab-3p::raga-1 cDNA::SL2::mCherry::unc-54 3'UTR],	Extrachromosomal arrays	Crossed WBM549 to WBM853
WBM671	wbmEx289 [myo-3p::tomm20 aa1-49::GFP::unc54 3'UTR]	Extrachromosomal arrays	Microinjection: 10 ng/μl, pHW21(myo-3p::tomm20 aa1-49::gfp::unc-54 3'UTR)
WBM717	raga-1(ok386) II; wbmEx289 [myo-3p::tomm20 aa1-49::GFP::unc-54 3'UTR]	Extrachromosomal arrays	Crossed WBM671 and WBM499
WBM726	raga-1(ok386) II; wbmEx238 [rab-3p::raga-1 cDNA::SL2::mCherry::unc-54 3'UTR], wbmEx289 [myo-3p::tomm20 aa1-49::GFP::unc54 3'UTR]	Extrachromosomal arrays	Crossed WBM549 and WBM717
WBM955	wbmEx373 [rab-3p::tomm-20 aa1-49::GFP::unc-54 3'UTR, rol-6]	Extrachromosomal arrays	Microinjection: pCE25 (rab-3p::tomm-20 aa1-49::GFP) and pRF4 (rol-6)
WBM991	raga-1(ok386) II; wbmEx373 [rab-3p::tomm-20 aa1-49::GFP::unc-54 3'UTR, rol-6]	Extrachromosomal arrays	Crossed WBM955 to WBM499
WBM926	wbmEx367[ges-1p::tomm20 aa1-49::GFP::unc-54 3'UTR]	Extrachromosomal arrays	(Weir et al. 2017)
WBM987	raga-1(ok386) II; wbmEx367[HW26 (ges-1p::tomm20 aa1-49::GFP::unc-54 3'UTR)]	Extrachromosomal arrays	Crossed WBM926 and WBM499
WBM952	wbmIs50 [HW21(myo-3p::tomm20 aa1-49::GFP::unc-54 3'UTR)]	Integrated arrays	Integrated the transgene in WBM671 using gamma irradiation and backcrossed to N2
WBM983	unc-64(e246) III; wbmIs50[HW21(myo-3p::tomm20 aa1-49::GFP::unc54 3'UTR)]	Integrated arrays	Crossed WBM952 to WBM499
CU5991	fzo-1 (tm1133) II.		CGC
WBM696	fzo-1(tm1133) raga-1(ok386) II.		Crossed CU5991 and WBM499
CU6372	drp-1(tm1108) IV.		CGC
WBM695	raga-1(ok386) II; drp-1(tm1108) IV.		Crossed CU6372 and WBM499
WBM861	fzo-1(tm1133) II; wbmEx335 [rab-3p:3xFLAG fzo-1 cDNA: unc54 3'UTR, myo-3p:mCherry]	Extrachromosomal arrays	Microinjection: 75 ng/μl pHW9 (rab-3p::fzo-1) and 25 ng/μl pCFJ104 (myo-3p::mCherry) to wild type, then crossed to CU5991
WBM1073	fzo-1(tm1133) raga-1(ok386) II; wbmEx335 [rab-3p:3xFLAG fzo-1 cDNA: unc54 3'UTR, myo-3p:mCherry]	Extrachromosomal arrays	Crossed WBM861 to WBM696
WBM593	wbmEx258 [pHW11 (myo-3p::3xFLAG::fzo-1 cDNA::unc-54 3'UTR) + pRF4 (rol-6(SU1006))]	Extrachromosomal arrays	Microinjection: pHW11(myo-3p::3xFLAG::fzo-1 cDNA::unc-54 3'UTR) + pRF4(rol-6(SU1006))
WBM612	fzo-1 (tm1133) II; wbmEx258 [pHW11 (myo-3p::3xFLAG::fzo-1 cDNA::unc-54 3'UTR) + pRF4 (rol-6(SU1006))]	Extrachromosomal arrays	Crossed WBM593 to CU5991
WBM1074	fzo-1(tm1133) raga-1(ok386) II; wbmEx258 [pHW11 (myo-3p::3xFLAG::fzo-1 cDNA::unc-54 3'UTR) + pRF4 (rol-6(SU1006))]	Extrachromosomal arrays	Crossed WBM639 to WBM696
WBM639	fzo-1(tm1133) II; wbmEx276 [pHW18 (ges-1p::3xFLAG::fzo-1 cDNA::unc54 3’UTR) + pRF4(rol-6(SU1006))]	Extrachromosomal arrays	(Weir et al. 2017)
WBM1066	fzo-1(tm1133) raga-1(ok386) II; wbmEx276 [pHW18 (ges-1p::3xFLAG::fzo-1 cDNA::unc-54 3’UTR) + pRF4(rol-6(SU1006))]	Extrachromosomal arrays	Crossed WBM628 and WBM696
WBM898	drp-1(tm1108) IV; wbmEx238 [rab-3p::raga-1 cDNA::SL2::mCherry::unc-54 3'UTR]	Extrachromosomal arrays	Crossed WBM536 to CU6372
WBM851	raga-1(ok386) II; drp-1(tm1108) IV; wbmEx238 [rab-3p::raga-1 cDNA::SL2::mCherry::unc-54 3'UTR]	Extrachromosomal arrays	Crossed WBM549 to WBM695

## Sheet: Strains by Figure
Figure 1
a, b	N2	VC222
c	N2	WBM131
d	N2	WBM131												WBM193	WBM194
e	N2	WBM499	WBM131	WBM511
f	N2	WBM499	WBM997	WBM1075
g	N2	KK300
h	N2	WBM499	WBM132	WBM776
i	WBM244
j	WBM242
k	WBM243
l	WBM245
Figure 1 - figure supplement 1
a	N2	WBM131	WBM997
b, c	N2
e, f	WBM185	WBM190	WBM191	WBM192
g	WBM131	WBM291
h	YB941	YB969
Figure 2
a	N2	WBM499	WBM536	WBM549
b	N2	WBM740	WBM772	WBM784
c	N2	WBM499	WBM1168	WBM1170	WBM1167	WBM1169
d	N2	WBM499	WBM1169	WBM1170	WBM549
e	N2	WBM499	WBM650	WBM622
f	N2	WBM499	WBM1168	WBM1170	WBM1167	WBM1169
Figure 2 - figure supplement 1
	N2	WBM499	WBM536	WBM549
Figure 2 - figure supplement 2
a	WBM549
b	N2	WBM499	WBM549
Figure 2 - figure supplement 3
	N2	WBM499	WBM1168	WBM1170	WBM1167	WBM1169
Figure 3
a, b	N2	WBM499	WBM549
c, d	N2	WBM499	WBM549	WBM1170
e	N2	CB246	WBM499	WBM853	WBM549	WBM868
Figure 3 - figure supplement 1
a, b	N2	WBM499	WBM549
Figure 3 - figure supplement 2
	N2	WBM499	WBM549
Figure 3 - figure supplement 3
	N2	WBM499	WBM1169	WBM1170	WBM549
Figure 4
a, b, c, d, e, f	WBM671	WBM717	WBM726
Figure 4 - figure supplement 3
a, b, c, d, e, f, g	WBM955	WBM991
Figure 4 - figure supplement 4
a, b, c	WBM926	WBM987
Figure 4 - figure supplement 5
a, b	WBM671	WBM717	WBM726
Figure 4 - figure supplement 6
a, b, c, d, e, f	WBM952	WBM983
Figure 5
a	N2	WBM499	CU5991	WBM696
b	N2	WBM499	CU6372	WBM695
c	WBM861	WBM1073
d	WBM612	WBM1074
e	WBM639	WBM1066
f	N2	CU6372	WBM499	WBM695	WBM549	WBM851
Figure 5 - figure supplement 1
	N2	WBM499	CU5991	WBM696
