# Supplementary material for: Neuronal TORC1 modulates longevity via AMPK and cell nonautonomous regulation of mitochondrial dynamics in C. elegans
Source: eLife journal article supplement (doi:10.7554/elife.49158), 2019-08-14
Supplement: supp [file elife-49158-supp-v1.zip › elife_poa_e49158_Supplemental_file_5.xlsx]

## Sheet: Sheet1
	forward primer 1	forward primer 2	reverse primer	annealing temperature (℃)	band size for wild type allele (bp)	band size for mutant allele (bp)	notes
aak-2(ok524)	CGC AAG GAC CGC GAT AGC	GAGTGA TTA TGGTGGTCT CCT GAT C	TTG GTA TGT TGT CGT AAT CCT TTG CC	54	354	749	Used when there was no transgene to rescue aak-2 with genomic aak-2 sequence.
aak-2(ok524)	CTA CCA AGT CAT CAG TAC ACC TTC TG	none	GGC ATC AAG GAG TGC TTA ACG AG	63	2678	2270	Used when there was a transgene to rescue aak-2 with genomic aak-2 sequence
raga-1(ok386)	TGC TCA TGT CAA GTA AGG GAT CAA TTC	TTC AAGTCC GAA ACA GTC AATTCT C	GGA ACT GAA GCG ATC ACA CCG AC	57	688	195
rsks-1(ok1255)	TTCTGT GGTTTCTGT GCCTTT ATC C	CTG GCG GCG AAT TAT TCA TGC	CAC CAG CTC TCG ACA TAG ACG	54	804	541
fzo-1(tm1133)	TTG TCA ATC CAG CTA TCG AAT TCT GG	none	CCG GCT GAT TTA TGA GAC TTT A	53	850	450
drp-1(tm1108)	GGT GAG AAT TTA GTA ATT TGA ATA TTG CG	none	TGA CAG ATT CCA AAG ATC TTC CGA A	56	933	526
