# Supplementary material for: Neuronal TORC1 modulates longevity via AMPK and cell nonautonomous regulation of mitochondrial dynamics in C. elegans
Source: eLife journal article supplement (doi:10.7554/elife.49158), 2019-08-14
Supplement: supp [file elife-49158-supp-v1.zip › elife_poa_e49158_Supplemental_file_6.xlsx]

## Sheet: Sheet1
Lifespan number	Strain name	Genotype	Transgene type	Treatment	# Deaths/total before censoring	Median lifespan (days)	Control for comparison	p value treated vs. untreated (log-rank (Mantel-Cox) test)	% Lifespan extension (compared to control group)	FUDR	Figure
1	N2	wild type		no RNAi	83/100	21				No	Figure 1c
	N2	wild type		let-363 RNAi	87/100	23	wild type, no RNAi	<0.0001	9.5	No
	WBM131	aak-2(ok524)		no RNAi	90/100	15				No
	WBM131	aak-2(ok524)		let-363 RNAi	85/100	16	aak-2(ok524), no RNAi	0.0122	6.7	No
							wild type, let-363 RNAi	<0.0001	-30.4	No
2	N2	wild type		no RNAi	103/120	19				No	Figure 1c repeat
	N2	wild type		let-363 RNAi	100/120	23	wild type, no RNAi	0.0009	21.1	No
	RB754	aak-2(ok524)		no RNAi	87/120	16				No
	RB754	aak-2(ok524)		let-363 RNAi	73/120	16	aak-2(ok524), no RNAi	0.0216 (hazard ratio of let-363 RNAi/no RNAi >1)	0	No
							wild type, let-363 RNAi	<0.0001	-30.4	No
3	N2	wild type		no RNAi	92/100	21				No	Figure 1c repeat
	N2	wild type		let-363 RNAi	81/100	23	wild type, no RNAi	0.0013	9.5	No	Figure 1d repeat
	N2	wild type		raga-1 RNAi	89/100	25	wild type, no RNAi	<0.0001	19	No
	WBM131	aak-2(ok524)		no RNAi	83/100	15				No
	WBM131	aak-2(ok524)		let-363 RNAi	71/100	15	aak-2(ok524), no RNAi	0.619	0	No
							wild type, let-363 RNAi	<0.0001	-34.8	No
	WBM131	aak-2(ok524)		raga-1 RNAi	66/100	17	aak-2(ok524), no RNAi	0.342	13	No
4	N2	wild type		no RNAi	107/120	19				No	Figure 1d
	N2	wild type		raga-1 RNAi	108/120	21	wild type, no RNAi	<0.0001	11	No
	WBM131	aak-2(ok524)		no RNAi	100/120	17				No
	WBM131	aak-2(ok524)		raga-1 RNAi	82/120	17	aak-2(ok524), no RNAi	0.1968	0	No
5	N2	wild type		no RNAi	129/131	20				Yes	Figure 1e
	WBM499	raga-1(ok386)		no RNAi	109/125	25	wild type	<0.0001	25	Yes
	WBM131	aak-2(ok524)		no RNAi	108/125	18				Yes
	WBM511	raga-1(ok386); aak-2(ok524)		no RNAi	100/25	18	aak-2(ok524)	0.9735	0	Yes
6	N2	wild type		no RNAi	94/125	21				Yes	Figure 1f
	WBM499	raga-1(ok386)		no RNAi	93/125	25	wild type	<0.0001	19	Yes	Figure 1e repeat
	WBM131	aak-2(ok524)		no RNAi	97/125	19				Yes	Figure 5d, e
	WBM511	raga-1(ok386); aak-2(ok524)	CRISPR-mediated point mutation for aak-2	no RNAi	100/125	19	aak-2(ok524)	0.361	0	Yes	Figure 5c repeat
	WBM997	aak-2(T243A)	CRISPR-mediated point mutation	no RNAi	96/125	21				Yes
	WBM1075	raga-1(ok386); aak-2(T243A)	CRISPR-mediated point mutation for aak-2	no RNAi	107/125	19	aak-2(T243A)	0.5354	-9.5	Yes
	CU5991	fzo-1 (tm1133)		no RNAi	91/125	23				Yes
	WBM696	fzo-1 (tm1133) raga-1(ok386)		no RNAi	117/125	21	fzo-1 (tm1133)	0.1511	-8.7	Yes
							raga-1(ok386)	0.0009	-16
	WBM861	fzo-1 (tm1133); rab-3p::fzo-1	Extrachromosomal arrays	no RNAi	95/116	23				Yes
	WBM1073	fzo-1 (tm1133) raga-1(ok386); rab-3p::fzo-1	Extrachromosomal arrays	no RNAi	77/85	23	fzo-1 (tm1133); rab-3p::fzo-1	0.2011	0	Yes
							raga-1(ok386); fzo-1 (tm1133)	0.3245	9.5
	WBM639	fzo-1 (tm1133); ges-1p::fzo-1	Extrachromosomal arrays	no RNAi	43/52	21				Yes
	WBM1066	fzo-1 (tm1133) raga-1(ok386); ges-1p::fzo-1	Extrachromosomal arrays	no RNAi	104/110	25	fzo-1 (tm1133); ges-1p::fzo-1	<0.0001	19	Yes
							raga-1(ok386); fzo-1 (tm1133)	<0.0001	19
	WBM612	fzo-1 (tm1133); myo-p::fzo-1	Extrachromosomal arrays	no RNAi	76/90	21				Yes
	WBM1074	fzo-1 (tm1133) raga-1(ok386); myo-3p::fzo-1	Extrachromosomal arrays	no RNAi	110/115	21	fzo-1 (tm1133); myo-3p::fzo-1	0.2011	0	Yes
							raga-1(ok386); fzo-1 (tm1133)	0.3245	0
7	N2	wild type		no RNAi	116/120	20				Yes	Figure 1e repeat
	WBM499	raga-1(ok386)		no RNAi	115/125	24	wild type	<0.0001	20	Yes	Figure 1f repeat
	WBM131	aak-2(ok524)		no RNAi	109/125	17				Yes
	WBM511	raga-1(ok386); aak-2(ok524)		no RNAi	104/125	17	aak-2(ok524)	0.5304	0	Yes
	WBM997	aak-2(T243A)	CRISPR-mediated point mutation	no RNAi	102/120	18				Yes
	WBM1075	raga-1(ok386); aak-2(T243A)	CRISPR-mediated point mutation for aak-2	no RNAi	119/130	17	aak-2(T243A)	0.9531	-5.6	Yes
8	N2	wild type		no RNAi	102/125	18				Yes	Figure 1e repeat
	WBM499	raga-1(ok386)		no RNAi	79/110	24	wild type	<0.0001	33.3	Yes	Figure 1f repeat
	WBM131	aak-2(ok524)		no RNAi	38/122	17				Yes
	WBM511	raga-1(ok386); aak-2(ok524)		no RNAi	70/125	21	aak-2(ok524)	<0.0001	23.5	Yes
	WBM997	aak-2(T243A)	CRISPR-mediated point mutation	no RNAi	63/125	17				Yes
	WBM1075	raga-1(ok386); aak-2(T243A)	CRISPR-mediated point mutation for aak-2	no RNAi	80/135	20	aak-2(T243A)	0.0027	17.6	Yes
9	N2	wild type		no RNAi	109/120	12				No	Figure 1g
	N2	wild type		raga-1 RNAi	107/124	15	wild type, no RNAi	0.0001	25	No
	KK300	par-4(it57)		no RNAi	111/120	12				No
	KK300	par-4(it57)		raga-1 RNAi	99/110	12	par-4(it57), no RNAi	0.206	0	No
10	N2	wild type		no RNAi	82/100	16				No	Figure 1g repeat
	N2	wild type		raga-1 RNAi	68/100	20	wild type, no RNAi	<0.0001	25	No
	KK300	par-4(it57)		no RNAi	90/100	15				No
	KK300	par-4(it57)		raga-1 RNAi	78/100	15	par-4(it57), no RNAi	0.0207	0	No
										No
11	N2	wild type		no RNAi	110/125	17				No	Figure 1g repeat
	N2	wild type		raga-1 RNAi	91/125	19	wild type, no RNAi	<0.0001	11.8	No
	KK300	par-4(it57)		no RNAi	112/125	17				No
	KK300	par-4(it57)		raga-1 RNAi	115/127	17	par-4(it57), no RNAi	0.5362	0	No
12	N2	wild type		no RNAi	99/100	19				Yes	Figure 1h
	WBM499	raga-1(ok386)		no RNAi	97/100	23	wild type	<0.0001	21.1	Yes
	WBM132	rab-3p::crtc-1(S76A, S179A)	Extrachromosomal arrays	no RNAi	95/100	19				Yes
	WBM776	raga-1(ok386); rab-3p::crtc-1(S76A, S179A)	Extrachromosomal arrays	no RNAi	90/100	22	rab-3p::crtc-1(S76A, S179A)	<0.0001	15.8	Yes
13	N2	wild type		no RNAi	116/125	21				Yes	Figure 1h repeat
	WBM499	raga-1(ok386)		no RNAi	121/125	27	wild type	<0.0001	28.6	Yes
	WBM132	rab-3p::crtc-1(S76A, S179A)	Extrachromosomal arrays	no RNAi	104/125	21				Yes
	WBM776	raga-1(ok386); rab-3p::crtc-1(S76A, S179A)	Extrachromosomal arrays	no RNAi	116/125	23	rab-3p::crtc-1(S76A, S179A)	<0.0001	9.5	Yes
14	N2	wild type		no RNAi	95/130	22				Yes	Figure 1h repeat
	WBM499	raga-1(ok386)		no RNAi	117/125	25	wild type	<0.0001	13.6	Yes
	WBM132	rab-3p::crtc-1(S76A, S179A)	Extrachromosomal arrays	no RNAi	97/125	20				Yes
	WBM776	raga-1(ok386); rab-3p::crtc-1(S76A, S179A)	Extrachromosomal arrays	no RNAi	106/125	25	rab-3p::crtc-1(S76A, S179A)	<0.0001	25	Yes
15	N2	wild type		no RNAi	95/100	20				No	Figure 1i, j, k
	N2	wild type		raga-1 RNAi	84/90	24	wild type, no RNAi	<0.0001	20	No	Figure 1d repeat
	WBM131	aak-2(ok524)		no RNAi	68/100	15				No
	WBM131	aak-2(ok524)		raga-1 RNAi	62/85	17	aak-2(ok524), no RNAi	0.0517	13	No
	WBM242	aak-2(ok524); gly-19p::aak-2(aa1-321)	Extrachromosomal arrays	no RNAi	85/100	17				No
	WBM242	aak-2(ok524); gly-19p::aak-2(aa1-321)	Extrachromosomal arrays	raga-1 RNAi	72/100	17	aak-2(ok524); gly-19p::aak-2(aa1-321), no RNAi	0.0342	0	No
	WBM243	aak-2(ok524); myo-3p::aak-2(aa1-321)	Extrachromosomal arrays	no RNAi	44/70	15				No
	WBM243	aak-2(ok524); myo-3p::aak-2(aa1-321)	Extrachromosomal arrays	raga-1 RNAi	78/100	14	aak-2(ok524); myo-3p::aak-2(aa1-321), no RNAi	0.9827	-6.7	No
	WBM244	aak-2(ok524); sur-5p::aak-2(aa1-321)	Extrachromosomal arrays	no RNAi	86/102	17				No
	WBM244	aak-2(ok524); sur-5p::aak-2(aa1-321)	Extrachromosomal arrays	raga-1 RNAi	79/100	22	aak-2(ok524); sur-5p::aak-2(aa1-321), no RNAi	<0.0001	29	No
16	N2	wild type		no RNAi	81/100	18				No	Figure 1l
	N2	wild type		raga-1 RNAi	92/100	22	wild type, no RNAi	<0.0001	22	No	Figure 1d repeat
	WBM131	aak-2(ok524)		no RNAi	73/100	15				No
	WBM131	aak-2(ok524)		raga-1 RNAi	70/100	15	aak-2(ok524), no RNAi	0.0125	0	No
	WBM245	aak-2(ok524); rab-3p::aak-2(aa1-321)	Extrachromosomal arrays	no RNAi	66/102	14				No
	WBM245	aak-2(ok524); rab-3p::aak-2(aa1-321)	Extrachromosomal arrays	raga-1 RNAi	68/107	19	aak-2(ok524); rab-3p::aak-2(aa1-321), no RNAi	<0.0001	36	No
17	N2	wild type		no RNAi	97/100	18				No	Figure 1l repeat
	N2	wild type		raga-1 RNAi	95/100	24	wild type, no RNAi	<0.0001	33	No	Figure 1d repeat
	WBM131	aak-2(ok524)		no RNAi	83/100	14				No
	WBM131	aak-2(ok524)		raga-1 RNAi	75/100	14	aak-2(ok524), no RNAi	0.462	0	No
	WBM245	aak-2(ok524); rab-3p::aak-2(aa1-321)	Extrachromosomal arrays	no RNAi	67/90	13				No
	WBM245	aak-2(ok524); rab-3p::aak-2(aa1-321)	Extrachromosomal arrays	raga-1 RNAi	69/100	17	aak-2(ok524); rab-3p::aak-2(aa1-321), no RNAi	0.0029	31	No
18	N2	wild type		no RNAi	115/125	20				No	Figure 1d repeat
	N2	wild type		raga-1 RNAi	111/125	24	wild type, no RNAi	0.0001	20	No	Figure 1i, j, k, l repeat
	WBM131	aak-2(ok524)		no RNAi	90/125	17				No
	WBM131	aak-2(ok524)		raga-1 RNAi	77/125	16	aak-2(ok524), no RNAi	0.2781	-5.9	No
	WBM244	aak-2(ok524); sur-5p::aak-2(aa1-321)	Extrachromosomal arrays	no RNAi	109/125	19.5				No
	WBM244	aak-2(ok524); sur-5p::aak-2(aa1-321)	Extrachromosomal arrays	raga-1 RNAi	78/125	26	aak-2(ok524); sur-5p::aak-2(aa1-321), no RNAi	<0.0001	33.3	No
	WBM242	aak-2(ok524); gly-19p::aak-2(aa1-321)	Extrachromosomal arrays	no RNAi	102/125	17				No
	WBM242	aak-2(ok524); gly-19p::aak-2(aa1-321)	Extrachromosomal arrays	raga-1 RNAi	84/125	18	aak-2(ok524); gly-19p::aak-2(aa1-321), no RNAi	0.9329	5.9	No
	WBM243	aak-2(ok524); myo-3p::aak-2(aa1-321)	Extrachromosomal arrays	no RNAi	100/125	18				No
	WBM243	aak-2(ok524); myo-3p::aak-2(aa1-321)	Extrachromosomal arrays	raga-1 RNAi	81/125	17	aak-2(ok524); myo-3p::aak-2(aa1-321), no RNAi	0.0027	-5.6	No
	WBM245	aak-2(ok524); rab-3p::aak-2(aa1-321)	Extrachromosomal arrays	no RNAi	117/147	16				No
	WBM245	aak-2(ok524); rab-3p::aak-2(aa1-321)	Extrachromosomal arrays	raga-1 RNAi	103/156	16	aak-2(ok524); rab-3p::aak-2(aa1-321), no RNAi	0.0157	0	No
19	N2	wild type		no RNAi	113/125	21				No	Figure 1d repeat
	N2	wild type		raga-1 RNAi	110/125	24	wild type, no RNAi	<0.0001	14.3	No	Figure 1i, j, k, l repeat
	WBM131	aak-2(ok524)		no RNAi	86/125	20				No
	WBM131	aak-2(ok524)		raga-1 RNAi	83/125	19	aak-2(ok524), no RNAi	0.7423	-5	No
	WBM244	aak-2(ok524); sur-5p::aak-2(aa1-321)	Extrachromosomal arrays	no RNAi	109/125	21				No
	WBM244	aak-2(ok524); sur-5p::aak-2(aa1-321)	Extrachromosomal arrays	raga-1 RNAi	100/125	26	aak-2(ok524); sur-5p::aak-2(aa1-321), no RNAi	<0.0001	23.8	No
	WBM242	aak-2(ok524); gly-19p::aak-2(aa1-321)	Extrachromosomal arrays	no RNAi	97/125	20				No
	WBM242	aak-2(ok524); gly-19p::aak-2(aa1-321)	Extrachromosomal arrays	raga-1 RNAi	94/125	19	aak-2(ok524); gly-19p::aak-2(aa1-321), no RNAi	0.7055	-5	No
	WBM243	aak-2(ok524); myo-3p::aak-2(aa1-321)	Extrachromosomal arrays	no RNAi	107/130	20				No
	WBM243	aak-2(ok524); myo-3p::aak-2(aa1-321)	Extrachromosomal arrays	raga-1 RNAi	93/125	20	aak-2(ok524); myo-3p::aak-2(aa1-321), no RNAi	0.0665	0	No
	WBM245	aak-2(ok524); rab-3p::aak-2(aa1-321)	Extrachromosomal arrays	no RNAi	82/125	18				No
	WBM245	aak-2(ok524); rab-3p::aak-2(aa1-321)	Extrachromosomal arrays	raga-1 RNAi	85/130	21	aak-2(ok524); rab-3p::aak-2(aa1-321), no RNAi	<0.0001	16.7	No
20	N2	wild type		no RNAi	91/100	19				No	Figure 1 -- figure supplement 1g
	N2	wild type		raga-1 RNAi	64/100	22	wild type, no RNAi	<0.0001	16	No	Figure 1d repeat
	WBM131	aak-2(ok524)		no RNAi	71/100	12				No
	WBM131	aak-2(ok524)		raga-1 RNAi	70/100	12	aak-2(ok524), no RNAi	0.4932	0	No
	WBM290	aak-2(ok524); aak-2p::aak-2	Extrachromosomal arrays	no RNAi	82/100	16				No
	WBM290	aak-2(ok524); aak-2p::aak-2	Extrachromosomal arrays	raga-1 RNAi	75/100	17	aak-2(ok524); aak-2p::aak-2, no RNAi	0.0015	6.3	No
	WBM291	aak-2(ok524); aak-2p::aak-2(S551A)	Extrachromosomal arrays	no RNAi	82/95	19				No
	WBM291	aak-2(ok524); aak-2p::aak-2(S551A)	Extrachromosomal arrays	raga-1 RNAi	92/105	25	aak-2(ok524); aak-2p::aak-2(S551A), no RNAi	<0.0001	32	No
21	N2	wild type		no RNAi	87/100	19				No	Figure 1 -- figure supplement 1g repeat
	N2	wild type		raga-1 RNAi	85/100	23	wild type, no RNAi	<0.0001	21	No
	WBM290	aak-2(ok524); aak-2p::aak-2	Extrachromosomal arrays	no RNAi	85/100	17				No
	WBM290	aak-2(ok524); aak-2p::aak-2	Extrachromosomal arrays	raga-1 RNAi	98/105	17	aak-2(ok524); aak-2p::aak-2, no RNAi	0.1113	0	No
	WBM291	aak-2(ok524); aak-2p::aak-2(S551A)	Extrachromosomal arrays	no RNAi	75/100	21				No
	WBM291	aak-2(ok524); aak-2p::aak-2(S551A)	Extrachromosomal arrays	raga-1 RNAi	53/100	21	aak-2(ok524); aak-2p::aak-2(S551A), no RNAi	0.0189	0	No
22	YB941	aak-1(tm1944); aak-2(ok524)		no RNAi	60/100	15				No	Figure 1 -- figure supplement 1h
	YB941	aak-1(tm1944); aak-2(ok524)		raga-1 RNAi	58/100	15	aak-1; aak-2, no RNAi	0.6885	0	No
	YB969	aak-1(tm1944); aak-2(ok524); rgef-1p::aak-2 full length	Extrachromosomal arrays	no RNAi	83/100	15				No
	YB969	aak-1(tm1944); aak-2(ok524); rgef-1p::aak-2 full length	Extrachromosomal arrays	raga-1 RNAi	80/100	19	aak-1; aak-2; rgef-1p::aak-2 full length , no RNAi	0.0002	27	No
23	N2	wild type		no RNAi	111/130	19				Yes	Figure 2a
	WBM499	raga-1(ok386)		no RNAi	113/125	28	wild type	<0.0001	47.4	Yes	Figure 3e
	WBM536	rab-3::raga-1	Extrachromosomal arrays	no RNAi	116/125	21					Figure 5f
	WBM549	raga-1(ok386); rab-3p::raga-1	Extrachromosomal arrays	no RNAi	85/125	19	rab-3p::raga-1	0.7932	-9.5	Yes
	CU6372	drp-1(tm1108)		no RNAi	112/125	19	wild type	0.344	0	Yes
	WBM695	raga-1(ok386); drp-1(tm1108)		no RNAi	92/125	27	raga-1(ok386)	0.5509	-3.6	Yes
	WBM851	raga-1(ok386); drp-1(tm1108); rab-3p::raga-1	Extrachromosomal arrays	no RNAi	106/125	28	raga-1(ok386); rab-3p::raga-1	<0.0001	47	Yes
	CB246	unc-64(e246)		no RNAi	109/125	18	wild type	0.3449	-5.3	Yes
	WBM853	raga-1(ok386); unc-64(e246)		no RNAi	113/125	28	raga-1(ok386)	0.2708	0	Yes
	WBM868	raga-1(ok386); unc-64(e246); rab-3p::raga-1	Extrachromosomal arrays	no RNAi	115/185	30	raga-1(ok386); rab-3p::raga-1	<0.0001	58	Yes
24	N2	wild type		no RNAi	185/200	18				Yes	Figure 2a repeat
	WBM499	raga-1(ok386)		no RNAi	156/200	24	wild type	<0.0001	33	Yes
	WBM536	rab-3::raga-1	Extrachromosomal arrays	no RNAi	192/200	19				Yes
	WBM549	raga-1(ok386); rab-3p::raga-1	Extrachromosomal arrays	no RNAi	150/200	18	rab-3p::raga-1	0.9904	-5.3	Yes
25	N2	wild type		no RNAi	92/100	19				Yes	Figure 2a repeat
	WBM499	raga-1(ok386)		no RNAi	81/100	26	wild type	<0.0001	37	Yes
	WBM536	rab-3::raga-1	Extrachromosomal arrays	no RNAi	94/100	21				Yes
	WBM549	raga-1(ok386); rab-3p::raga-1	Extrachromosomal arrays	no RNAi	77/123	21	rab-3p::raga-1	0.3463	0	Yes
26	N2	wild type		no RNAi	161/200	19				No	Figure 2 -- figure supplement 1
	WBM499	raga-1(ok386)		no RNAi	149/200	22	wild type	<0.0001	15	No
	WBM536	rab-3::raga-1	Extrachromosomal arrays	no RNAi	147/200	18				No
	WBM549	raga-1(ok386); rab-3p::raga-1	Extrachromosomal arrays	no RNAi	141/200	17	rab-3p::raga-1	0.5469	-5	No
27	N2	wild type		no RNAi	121/125	19				Yes	Figure 2b
	WBM740	rsks-1(ok1255)		no RNAi	120/125	26	wild type	<0.0001	37	Yes
	WBM772	rab-3p::rsks-1 transgene#1	Extrachromosomal arrays	no RNAi	120/125	21				Yes
	WBM784	rsks-1(ok1255); rab-3p::rsks-1 transgene#1	Extrachromosomal arrays	no RNAi	110/125	19	rab-3p::rsks-1 transgene#1	0.6539	-9.5	Yes
	WBM773	rab-3p::rsks-1 transgene#2	Extrachromosomal arrays	no RNAi	122/125	20				Yes
	WBM785	rsks-1(ok1255); rab-3p::rsks-1 transgene#2	Extrachromosomal arrays	no RNAi	109/125	20	rab-3p::rsks-1 transgene#2	0.0453	0	Yes
28	N2	wild type		no RNAi	117/125	20				Yes	Figure 2b repeat
	WBM740	rsks-1(ok1255)		no RNAi	98/127	20	wild type	<0.0001	0	Yes
	WBM772	rab-3p::rsks-1 transgene#1	Extrachromosomal arrays	no RNAi	122/125	20				Yes
	WBM784	rsks-1(ok1255); rab-3p::rsks-1 transgene#1	Extrachromosomal arrays	no RNAi	110/125	19	rab-3p::rsks-1 transgene#1	0.2438	-5	Yes
	WBM773	rab-3p::rsks-1 transgene#2	Extrachromosomal arrays	no RNAi	119/125	20				Yes
	WBM785	rsks-1(ok1255); rab-3p::rsks-1 transgene#2	Extrachromosomal arrays	no RNAi	110/125	19	rab-3p::rsks-1 transgene#2	0.3475	-5	Yes
29	N2	wild type		no RNAi	97/100	20				Yes	Figure 2b repeat
	WBM740	rsks-1(ok1255)		no RNAi	94/100	22	wild type	<0.0001	10	Yes
	WBM772	rab-3p::rsks-1 transgene#1	Extrachromosomal arrays	no RNAi	83/100	20				Yes
	WBM784	rsks-1(ok1255); rab-3p::rsks-1 transgene#1	Extrachromosomal arrays	no RNAi	95/100	22	rab-3p::rsks-1 transgene#1	0.2599	10	Yes
	WBM773	rab-3p::rsks-1 transgene#2	Extrachromosomal arrays	no RNAi	81/100	22				Yes
	WBM785	rsks-1(ok1255); rab-3p::rsks-1 transgene#2	Extrachromosomal arrays	no RNAi	98/100	22	rab-3p::rsks-1 transgene#2	0.0044	0	Yes
30	N2	wild type		no RNAi	120/130	22				Yes	Figure 2b repeat
	WBM740	rsks-1(ok1255)		no RNAi	98/110	24	wild type	<0.0001	9.1	Yes
	WBM772	rab-3p::rsks-1 transgene#1	Extrachromosomal arrays	no RNAi	117/125	24				Yes
	WBM784	rsks-1(ok1255); rab-3p::rsks-1 transgene#1	Extrachromosomal arrays	no RNAi	106/125	22	rab-3p::rsks-1 transgene#1	0.1909	-9.1	Yes
	WBM773	rab-3p::rsks-1 transgene#2	Extrachromosomal arrays	no RNAi	91/105	22				Yes
	WBM785	rsks-1(ok1255); rab-3p::rsks-1 transgene#2	Extrachromosomal arrays	no RNAi	103/130	24	rab-3p::rsks-1 transgene#2	<0.0001	9.1	Yes
31	N2	wild type		no RNAi	140/160	17				No	Figure 2c
	WBM499	raga-1(ok386)		no RNAi	137/160	23	wild type	<0.0001	35	No
	WBM1167	SCIs[eft-3p::raga-1]	Single-copy insertion	no RNAi	113/163	17				No
	WBM1169	raga-1(ok386); SCIs[eft-3p::raga-1]	Single-copy insertion	no RNAi	139/160	17	SCIs[eft-3p::raga-1]	0.6471	0	No
	WBM1168	SCIs[rab-3p::raga-1]	Single-copy insertion	no RNAi	137/162	17				No
	WBM1170	raga-1(ok386); SCIs[rab-3p::raga-1]	Single-copy insertion	no RNAi	132/160	19	SCIs[rab-3p::raga-1]	<0.0001	12	No
							raga-1	<0.0001	-18
32	N2	wild type		no RNAi	182/202	17				No	Figure 2c repeat
	WBM499	raga-1(ok386)		no RNAi	171/198	20	wild type	<0.0001	18	No
	WBM1167	SCIs[eft-3p::raga-1]	Single-copy insertion	no RNAi	170/202	17				No
	WBM1169	raga-1(ok386); SCIs[eft-3p::raga-1]	Single-copy insertion	no RNAi	139/200	19	SCIs[eft-3p::raga-1]	<0.0001	12	No
							raga-1	0.0025	-5
	WBM1168	SCIs[rab-3p::raga-1]	Single-copy insertion	no RNAi	184/202	17				No
	WBM1170	raga-1(ok386); SCIs[rab-3p::raga-1]	Single-copy insertion	no RNAi	179/201	19	SCIs[rab-3p::raga-1]	<0.0001	12	No
							raga-1	<0.0001	-5
33	N2	wild type		no RNAi	102/122	16				No	Figure 2c repeat
	WBM499	raga-1(ok386)		no RNAi	132/161	24	wild type	<0.0001	50	No
	WBM1167	SCIs[eft-3p::raga-1]	Single-copy insertion	no RNAi	101/161	17				No
	WBM1169	raga-1(ok386); SCIs[eft-3p::raga-1]	Single-copy insertion	no RNAi	128/160	16	SCIs[eft-3p::raga-1]	0.9397	-6	No
	WBM1168	SCIs[rab-3p::raga-1]	Single-copy insertion	no RNAi	122/141	16				No
	WBM1170	raga-1(ok386); SCIs[rab-3p::raga-1]	Single-copy insertion	no RNAi	121/160	18	SCIs[rab-3p::raga-1]	0.0002	12.5	No
							raga-1	<0.0001	-25
34	N2	wild type		no RNAi	122/125	22				Yes	Figure 2e
	WBM499	raga-1(ok386)		no RNAi	126/131	28	wild type	<0.0001	27.3	Yes	Figure 1e repeat
	WBM131	aak-2(ok524)		no RNAi	117/135	20				Yes	Figure 2a repeat
	WBM511	raga-1(ok386); aak-2(ok524)		no RNAi	112/125	20	aak-2(ok524)	0.5839	0	Yes
	WBM536	rab-3::raga-1	Extrachromosomal arrays	no RNAi	122/125	22				Yes
	WBM549	raga-1(ok386); rab-3p::raga-1	Extrachromosomal arrays	no RNAi	110/125	22	rab-3p::raga-1	0.5667	0	Yes
	WBM650	ges-1p::raga-1	Extrachromosomal arrays	no RNAi	122/125	22				Yes
	WBM622	raga-1(ok386); ges-1p::raga-1	Extrachromosomal arrays	no RNAi	104/130	30	ges-1p::raga-1	<0.0001	36.4	Yes
35	N2	wild type		no RNAi	112/125	20				Yes	Figure 2a repeat
	WBM499	raga-1(ok386)		no RNAi	111/125	23	wild type	<0.0001	15	Yes	Figure 2d repeat
	WBM536	rab-3::raga-1	Extrachromosomal arrays	no RNAi	111/125	19				Yes
	WBM549	raga-1(ok386); rab-3p::raga-1	Extrachromosomal arrays	no RNAi	90/125	18	rab-3p::raga-1	0.0355	-5.3	Yes
	WBM650	ges-1p::raga-1	Extrachromosomal arrays	no RNAi	110/125	20				Yes
	WBM622	raga-1(ok386); ges-1p::raga-1	Extrachromosomal arrays	no RNAi	91/125	23	ges-1p::raga-1	<0.0001	15	Yes
36	N2	wild type		no RNAi	124/125	21				Yes	Figure 1e repeat
	WBM499	raga-1(ok386)		no RNAi	115/125	28	wild type	<0.0001	33	Yes	Figure 2d repeat
	WBM131	aak-2(ok524)		no RNAi	90/125	15				Yes
	WBM511	raga-1(ok386); aak-2(ok524)		no RNAi	107/125	16	aak-2(ok524)	0.0023	6.7	Yes
	WBM650	ges-1p::raga-1	Extrachromosomal arrays	no RNAi	124/130	20				Yes
	WBM622	raga-1(ok386); ges-1p::raga-1	Extrachromosomal arrays	no RNAi	112/125	22	ges-1p::raga-1	<0.0001	10	Yes
37	N2	wild type		no RNAi	85/100	22				Yes	Figure 2d repeat
	WBM499	raga-1(ok386)		no RNAi	93/100	26	wild type	<0.0001	18	Yes
	WBM650	ges-1p::raga-1	Extrachromosomal arrays	no RNAi	93/100	20				Yes
	WBM622	raga-1(ok386); ges-1p::raga-1	Extrachromosomal arrays	no RNAi	83/100	24	ges-1p::raga-1	<0.0001	20	Yes
38	N2	wild type		no RNAi	120/125	19				Yes	Figure 3e repeat
	WBM499	raga-1(ok386)		no RNAi	116/125	25				Yes	Figure 5f repeat
	WBM549	raga-1(ok386); rab-3p::raga-1	Extrachromosomal arrays	no RNAi	102/125	19				Yes
	CU6372	drp-1(tm1108)		no RNAi	121/125	21	wild type	<0.0001	10	Yes
	WBM695	raga-1(ok386); drp-1(tm1108)		no RNAi	117/125	25	raga-1(ok386)	0.624	0	Yes
	WBM851	raga-1(ok386); drp-1(tm1108); rab-3p::raga-1	Extrachromosomal arrays	no RNAi	93/100	24	raga-1(ok386); rab-3p::raga-1	<0.0001	26	Yes
	CB246	unc-64(e246)		no RNAi	110/119	17	wild type	0.2306	-10	Yes
	WBM853	raga-1(ok386); unc-64(e246)		no RNAi	116/125	35	raga-1(ok386)	0.0001	40	Yes
	WBM868	raga-1(ok386); unc-64(e246); rab-3p::raga-1	Extrachromosomal arrays	no RNAi	64/130	27	raga-1(ok386); rab-3p::raga-1	<0.0001	42	Yes
39	N2	wild type		no RNAi	105/112	27				Yes	Figure 3e repeat
	WBM499	raga-1(ok386)		no RNAi	113/125	27	wild type	<0.0001	0	Yes	Figure 5d repeat
	WBM549	raga-1(ok386); rab-3p::raga-1	Extrachromosomal arrays	no RNAi	97/125	23				Yes
	CU6372	drp-1(tm1108)		no RNAi	117/125	25	wild type	0.897	-7.4	Yes
	WBM695	raga-1(ok386); drp-1(tm1108)		no RNAi	97/120	27	raga-1(ok386)	0.0056	0	Yes
	WBM851	raga-1(ok386); drp-1(tm1108); rab-3p::raga-1	Extrachromosomal arrays	no RNAi	104/125	27	raga-1(ok386); rab-3p::raga-1	<0.0001	17	Yes
	CB246	unc-64(e246)		no RNAi	109/125	25	wild type	0.1567	-7.4	Yes
	WBM853	raga-1(ok386; unc-64(e246)		no RNAi	119/125	27	raga-1(ok386)	0.61	0	Yes
	WBM868	raga-1(ok386); unc-64(e246); rab-3p::raga-1	Extrachromosomal arrays	no RNAi	98/175	30	raga-1(ok386); rab-3p::raga-1	<0.0001	30	Yes
40	N2	wild type		no RNAi	120/126	19				Yes	Figure 2 -- figure supplement 2b
	N2	wild type		raga-1 RNAi	99/125	19	wild type, no RNAi	0.7479	0	Yes
	WBM499	raga-1(ok386)		no RNAi	123/125	28				Yes
	WBM499	raga-1(ok386)		raga-1 RNAi	113/125	26	raga-1(ok386), no RNAi	0.0133	-7.1	Yes
	WBM549	raga-1(ok386); rab-3p::raga-1	Extrachromosomal arrays	no RNAi	99/125	20				Yes
	WBM549	raga-1(ok386); rab-3p::raga-1	Extrachromosomal arrays	raga-1 RNAi	109/125	19	raga-1(ok386); rab-3p::raga-1, no RNAi	0.2057	-5	Yes
41	N2	wild type		no RNAi	94/125	22				Yes	Figure 2 -- figure supplement 2b
	N2	wild type		raga-1 RNAi	83/125	21	wild type, no RNAi	0.6076	4.5	Yes
	WBM499	raga-1(ok386)		no RNAi	113/125	27				Yes
	WBM499	raga-1(ok386)		raga-1 RNAi	118/126	26	raga-1(ok386), no RNAi	0.3621	-3.7	Yes
	WBM549	raga-1(ok386); rab-3p::raga-1	Extrachromosomal arrays	no RNAi	97/135	22				Yes
	WBM549	raga-1(ok386); rab-3p::raga-1	Extrachromosomal arrays	raga-1 RNAi	95/129	22	raga-1(ok386); rab-3p::raga-1, no RNAi	0.4756	0	Yes
42	N2	wild type		no RNAi	112/125	20				Yes	Figure 5a
	WBM499	raga-1(ok386)		no RNAi	116/125	28	wild type	<0.0001	40	Yes	Figure 5b
	CU5991	fzo-1 (tm1133)		no RNAi	80/125	21				Yes
	WBM696	fzo-1 (tm1133) raga-1(ok386)		no RNAi	121/125	20	fzo-1 (tm1133)	0.25	-4.8	Yes
							raga-1(ok386)	<0.0001	-28.6
	CU6372	drp-1(tm1108)		no RNAi	124/130	20				Yes
	WBM695	raga-1(ok386); drp-1(tm1108)		no RNAi	114/125	28	drp-1(tm1108)	<0.0001	40	Yes
							raga-1(ok386)	0.142	0
43	N2	wild type		no RNAi	117/125	20				Yes	Figure 5a repeat
	WBM499	raga-1(ok386)		no RNAi	118/125	25	wild type	<0.0001	25	Yes	Figure 5b repeat
	CU5991	fzo-1 (tm1133)		no RNAi	71/125	19				Yes
	WBM696	fzo-1 (tm1133) raga-1(ok386)		no RNAi	120/125	20	fzo-1 (tm1133)	0.0299	5.3	Yes
							raga-1(ok386)	<0.0001	-24
	CU6372	drp-1(tm1108)		no RNAi	118/125	20				Yes
	WBM695	raga-1(ok386); drp-1(tm1108)		no RNAi	106/125	26	drp-1(tm1108)	<0.0001	30	Yes
							raga-1(ok386)	0.0037	4
44	N2	wild type		no RNAi	128/130	21				Yes	Figure 5a repeat
	WBM499	raga-1(ok386)		no RNAi	118/125	27	wild type	<0.0001	29	Yes	Figure 5b repeat
	CU5991	fzo-1 (tm1133)		no RNAi	74/125	19				Yes
	WBM696	fzo-1(tm1133) raga-1(ok386)		no RNAi	121/125	23	fzo-1 (tm1133)	<0.0001	21	Yes
							raga-1(ok386)	0.0008	-14.8
	CU6372	drp-1(tm1108)		no RNAi	123/125	20				Yes
	WBM695	raga-1(ok386); drp-1(tm1108)		no RNAi	115/125	27	drp-1(tm1108)	<0.0001	35	Yes
							raga-1(ok386)	0.2052	0
45	N2	wild type		no RNAi	119/120	20				Yes	Figure 5a repeat
	WBM499	raga-1(ok386)		no RNAi	118/120	26	wild type	<0.0001	30	Yes	Figure 5b repeat
	CU5991	fzo-1 (tm1133)		no RNAi	102/120	20				Yes
	WBM696	fzo-1(tm1133) raga-1(ok386)		no RNAi	113/120	22	fzo-1 (tm1133)	0.0035	10	Yes
							raga-1(ok386)	<0.0001	-15.4
	CU6372	drp-1(tm1108)		no RNAi	114/120	20				Yes
	WBM695	raga-1(ok386); drp-1(tm1108)		no RNAi	114/120	26	drp-1(tm1108)	<0.0001	30	Yes
							raga-1(ok386)	0.8371	0
46	N2	wild type		no RNAi	118/125	21				Yes	Figure 5c, e repeat
	WBM499	raga-1(ok386)		no RNAi	116/130	24	wild type	<0.0001		Yes
	CU5991	fzo-1 (tm1133)		no RNAi	103/125	22				Yes
	WBM696	fzo-1(tm1133) raga-1(ok386)		no RNAi	119/125	21	fzo-1 (tm1133)	0.0171	-4.5	Yes
							raga-1(ok386)	0.7726	-12.5
	WBM861	fzo-1 (tm1133); rab-3p::fzo-1	Extrachromosomal arrays	no RNAi	71/84	22				Yes
	WBM1073	fzo-1(tm1133) raga-1(ok386); rab-3p::fzo-1	Extrachromosomal arrays	no RNAi	73/82	24	fzo-1 (tm1133); rab-3p::fzo-1	0.0213	9.1	Yes
							raga-1(ok386); fzo-1 (tm1133)	0.3273	14.3
	WBM639	fzo-1 (tm1133); ges-1p::fzo-1	Extrachromosomal arrays	no RNAi	75/118	22				Yes
	WBM1066	fzo-1(tm1133) raga-1(ok386); ges-1p::fzo-1	Extrachromosomal arrays	no RNAi	104/125	29	fzo-1 (tm1133); ges-1p::fzo-1	<0.0001	31.8	Yes
							raga-1(ok386); fzo-1 (tm1133)	<0.0001	38.1
47	N2	wild type		no RNAi	117/125	21				Yes	Figure 5c
	WBM499	raga-1(ok386)		no RNAi	91/125	26	wild type	<0.0001	23.8	Yes	Figure 5d, e repeat
	CU5991	fzo-1 (tm1133)		no RNAi	82/125	22				Yes
	WBM696	fzo-1(tm1133) raga-1(ok386)		no RNAi	100/25	24	fzo-1 (tm1133)	0.009	9.1	Yes
							raga-1(ok386)	0.0138	-7.7
	WBM861	fzo-1 (tm1133); rab-3p::fzo-1	Extrachromosomal arrays	no RNAi	101/135	24				Yes
	WBM1073	raga-1(ok386); fzo-1 (tm1133); rab-3p::fzo-1	Extrachromosomal arrays	no RNAi	84/125	25	fzo-1 (tm1133); rab-3p::fzo-1	0.5584	4.1	Yes
							raga-1(ok386); fzo-1 (tm1133)	0.3555	4.1
	WBM639	fzo-1 (tm1133); ges-1p::fzo-1	Extrachromosomal arrays	no RNAi	70/88	23				Yes
	WBM1066	fzo-1(tm1133) raga-1(ok386); ges-1p::fzo-1	Extrachromosomal arrays	no RNAi	71/126	31	fzo-1 (tm1133); ges-1p::fzo-1	<0.0001	34.8	Yes
							raga-1(ok386); fzo-1 (tm1133)
	WBM593	fzo-1 (tm1133); myo-3p::fzo-1	Extrachromosomal arrays	no RNAi	103/119	23				Yes
	WBM1074	raga-1(ok386); fzo-1 (tm1133); myo-3p::fzo-1	Extrachromosomal arrays	no RNAi	117/125	25	fzo-1 (tm1133); myo-3p::fzo-1	0.0008	9	Yes
							raga-1(ok386); fzo-1 (tm1133)	0.5351	4	Yes
48	N2	wild type		no RNAi	110/120	16				No	Figure 5 -- figure supplement 1
	WBM499	raga-1(ok386)		no RNAi	153/199	22	wild type	<0.0001	37.5	No	Figure 5d repeat
	CU5991	fzo-1 (tm1133)		no RNAi	109/198	16				No
	WBM696	fzo-1(tm1133) raga-1(ok386)		no RNAi	144/197	16	fzo-1 (tm1133)	0.8252	0	No
							raga-1(ok386)	<0.0001	-27	No
	WBM593	fzo-1 (tm1133); myo-3p::fzo-1	Extrachromosomal arrays	no RNAi	106/120	17				No
	WBM1074	fzo-1(tm1133) raga-1(ok386); myo-3p::fzo-1	Extrachromosomal arrays	no RNAi	76/120	14	fzo-1 (tm1133); myo-3p::fzo-1	0.6419	-18	No
							raga-1(ok386); fzo-1 (tm1133)	0.662	-12.5	No
49	N2	wild type		no RNAi	174/198	18				No	Figure 5 -- figure supplement 1 repeat
	WBM499	raga-1(ok386)		no RNAi	151/200	23	wild type	<0.0001	28	No	Figure 5d repeat
	CU5991	fzo-1 (tm1133)		no RNAi	66/197	16				No
	WBM696	fzo-1(tm1133) raga-1(ok386)		no RNAi	126/199	19	fzo-1 (tm1133)	0.0494	19	No
							raga-1(ok386)	<0.0001	-17	No
	WBM593	fzo-1 (tm1133); myo-3p::fzo-1	Extrachromosomal arrays	no RNAi	148/199	19				No
	WBM1074	fzo-1(tm1133) raga-1(ok386); myo-3p::fzo-1	Extrachromosomal arrays	no RNAi	136/201	16	fzo-1 (tm1133); myo-3p::fzo-1	0.8334	-16	No
							raga-1(ok386); fzo-1 (tm1133)	0.3293	-16	No
50	N2	wild type		no RNAi	120/125	16				Yes	Figure 2a repeat
	WBM499	raga-1(ok386)		no RNAi	107/125	22	wild type	<0.0001	37.5	Yes	Figure 5b repeat
	WBM536	rab-3::raga-1	Extrachromosomal arrays	no RNAi	112/125	16				Yes	Figure 5f repeat
	WBM549	raga-1(ok386); rab-3p::raga-1	Extrachromosomal arrays	no RNAi	98/125	18	raga-1(ok386)	<0.0001	-18	Yes
	CU6372	drp-1(tm1108)		no RNAi	119/125	16	wild type	0.0007	0	Yes
	WBM695	raga-1(ok386); drp-1(tm1108)		no RNAi	92/125	22	drp-1(tm1108)	<0.0001	37.5	Yes
	WBM851	raga-1(ok386); drp-1(tm1108); rab-3p::raga-1	Extrachromosomal arrays	no RNAi	78/90	20	raga-1(ok386); rab-3p::raga-1	<0.0001	11.1	Yes
	WBM898	drp-1(tm1108); rab-3p::raga-1	Extrachromosomal arrays	no RNAi	104/126	16	rab-3p::raga-1	0.234	0	Yes
