# Supplementary material for: Neuronal TORC1 modulates longevity via AMPK and cell nonautonomous regulation of mitochondrial dynamics in C. elegans
Source: eLife journal article supplement (doi:10.7554/elife.49158), 2019-08-14
Supplement: supp [file elife-49158-supp-v1.zip › elife_poa_e49158_Supplemental_file_7.xlsx]

## Sheet: Sheet1
	Parameters	Description
	Object Count (OC)	Number of mitochondrial particles in the ROI; Calculated from the Branch Count function of AnalyzeSkeleton.
	Object Length (OL)	Mean Length of mitochondrial particles in the ROI; Calculated from the Branch length function of Analyze Skeleton. (Unit: micron)
	Junction point (JP)	A junction point is defined as a single pixel in the skeletonized image that has more than three neighbouring pixels, thus being a node from which a branch arises
	Networks (N)	Number of Objects that possess a Junction Point.
	Junction Point/Network	Average Number of Junction points per network in a given cell (JP/N; JP/N =1 indicates 1 Junction Point per Network)
	Mitochondrial Footprint (MF)	Sum of area covered by the GFP signal from each mitochondrial particle within the selected ROI; (Unit: micron squared)
	Object Area (OA)	Average area of each mitochondrial particle within the ROI; (Unit: micron squared); OA = MF/OC
	Mitochondrial Coverage (MC)	Percentage of Total Cell Area covered by the signals from the mitochondrial particles or the mitochondrial network; (Unit: micron squared); MC = (MF/TCA)*100
	Total Cell Area (TCA)	Area of the cell within the ROI; (Unit: micron squared).
