# Supplementary figures and images for: Neuronal TORC1 modulates longevity via AMPK and cell nonautonomous regulation of mitochondrial dynamics in C. elegans
Source: eLife journal article supplement (doi:10.7554/elife.49158), 2019-08-14

Figure 1—figure supplement 1

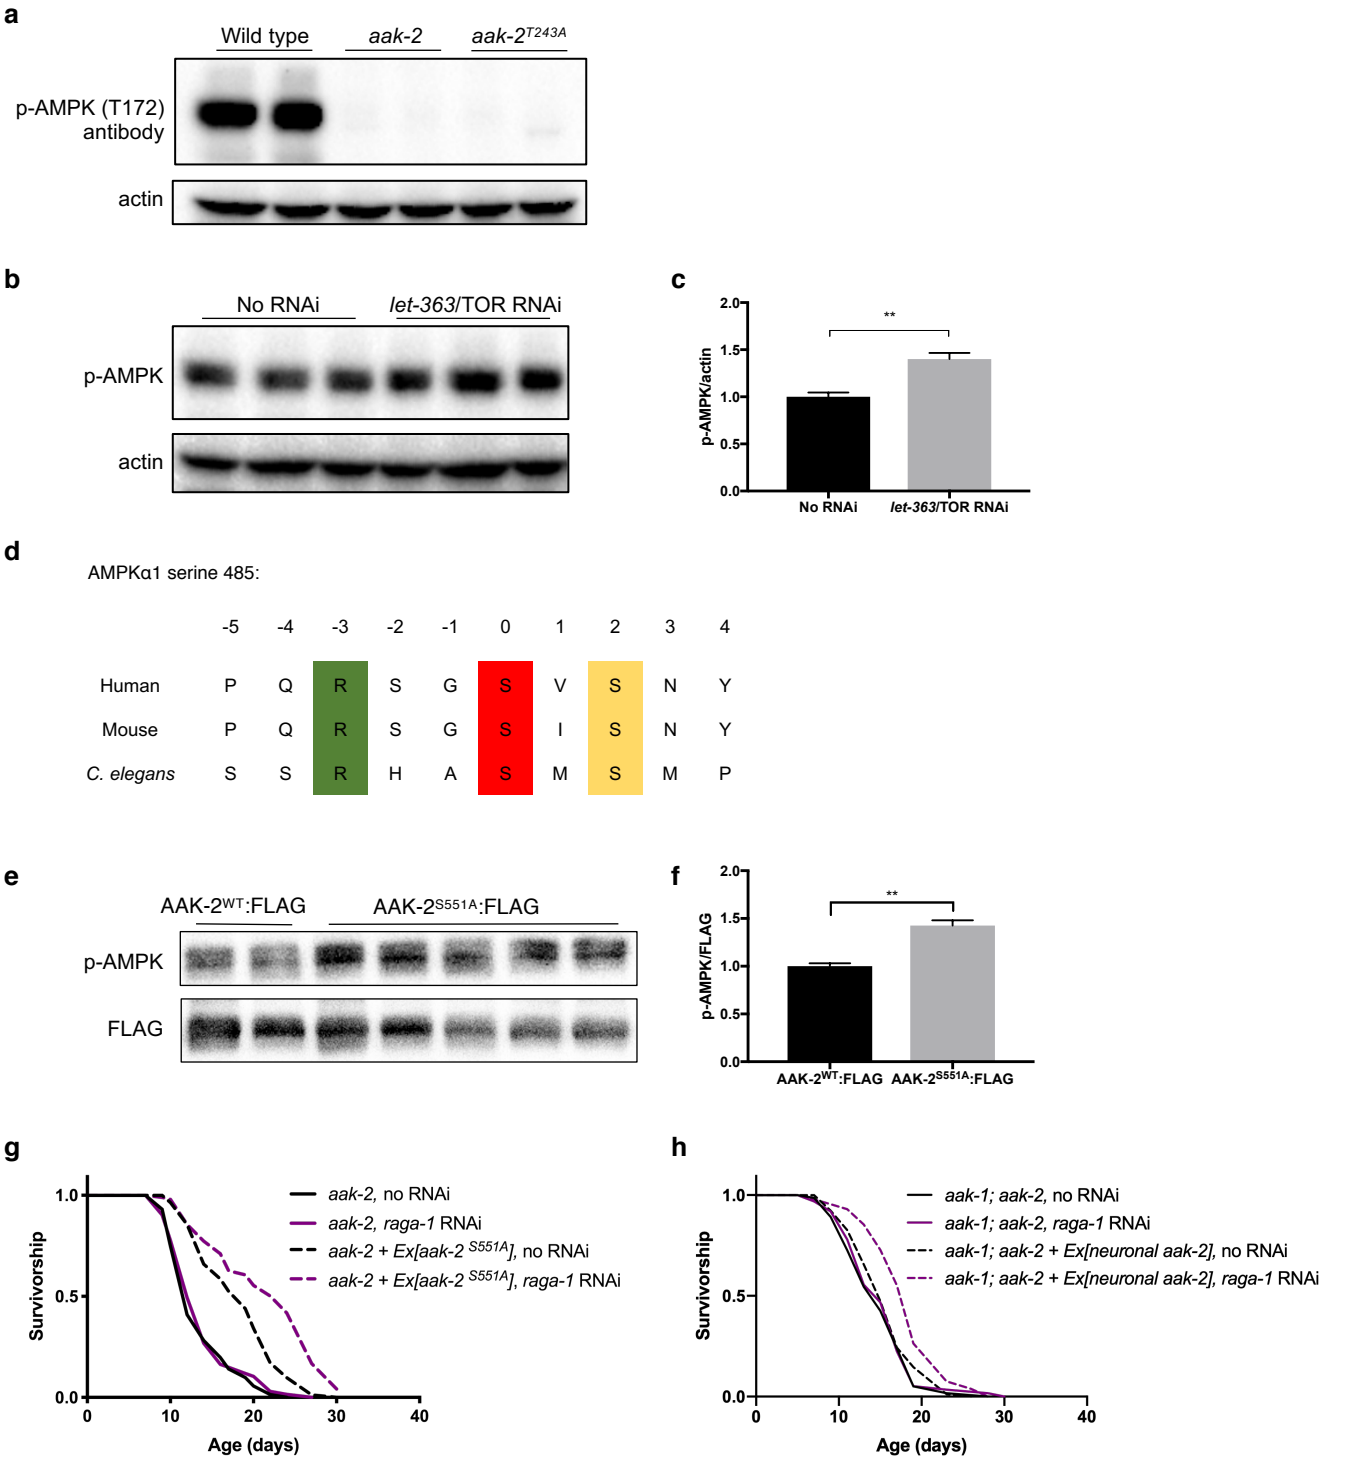

Supplement: supp [file elife-49158-supp-v1.zip › elife_poa_e49158_Figure_1_figure_supplement_1.pdf]

Figure 2—figure supplement 3

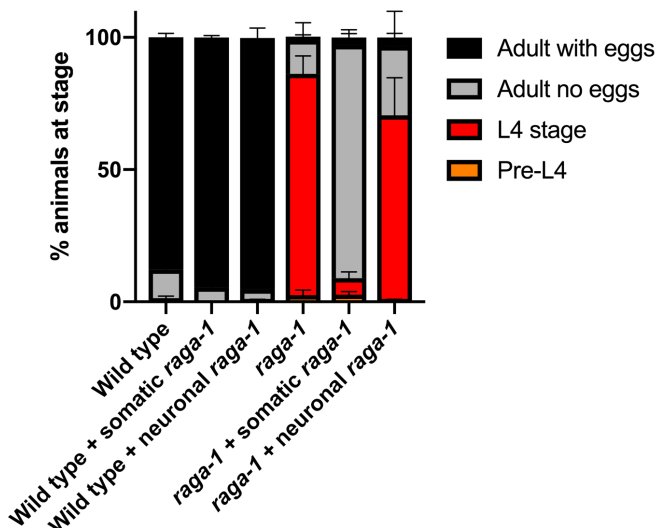

Supplement: supp [file elife-49158-supp-v1.zip › elife_poa_e49158_Figure_2_figure_supplement_3.pdf]

Figure 4—figure supplement 1

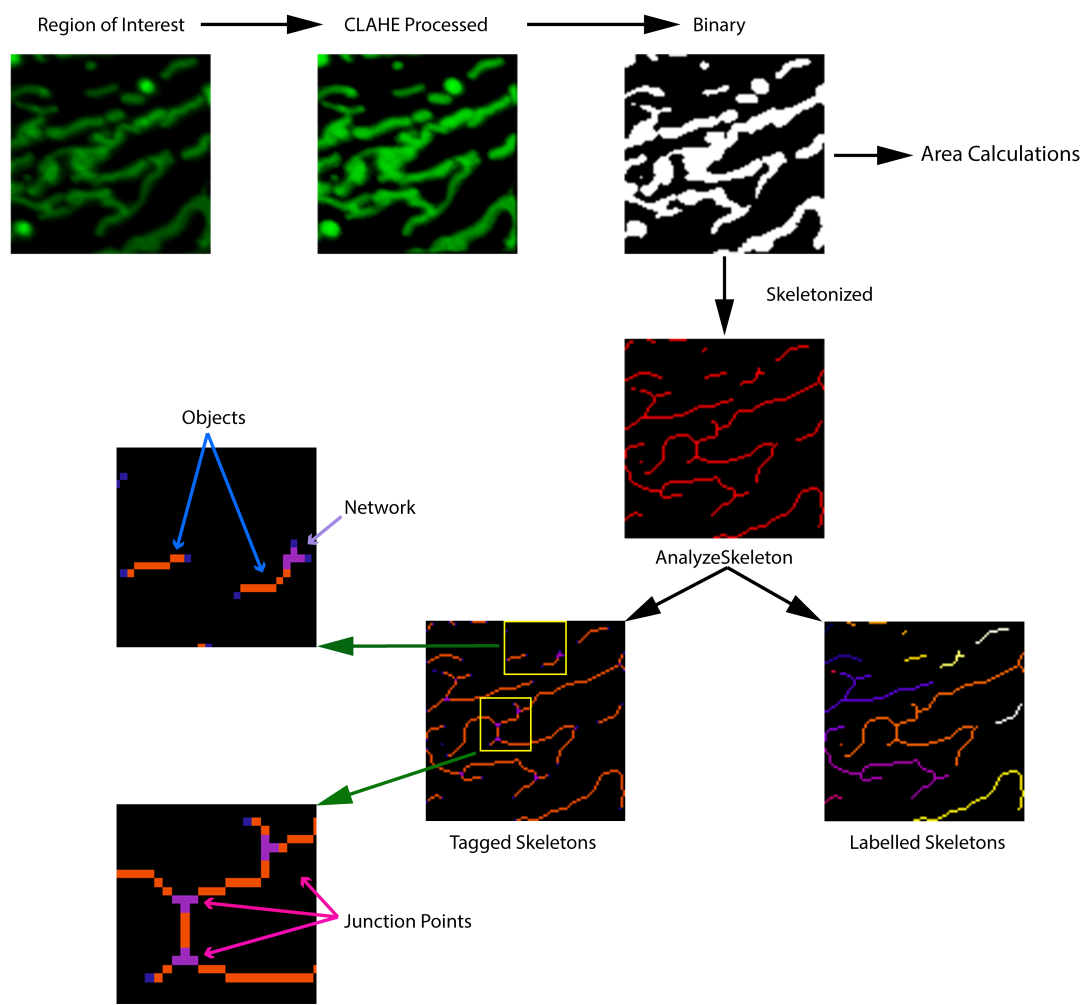

Supplement: supp [file elife-49158-supp-v1.zip › elife_poa_e49158_Figure_4_figure_supplement_1.pdf]

Figure 3—figure supplement 1

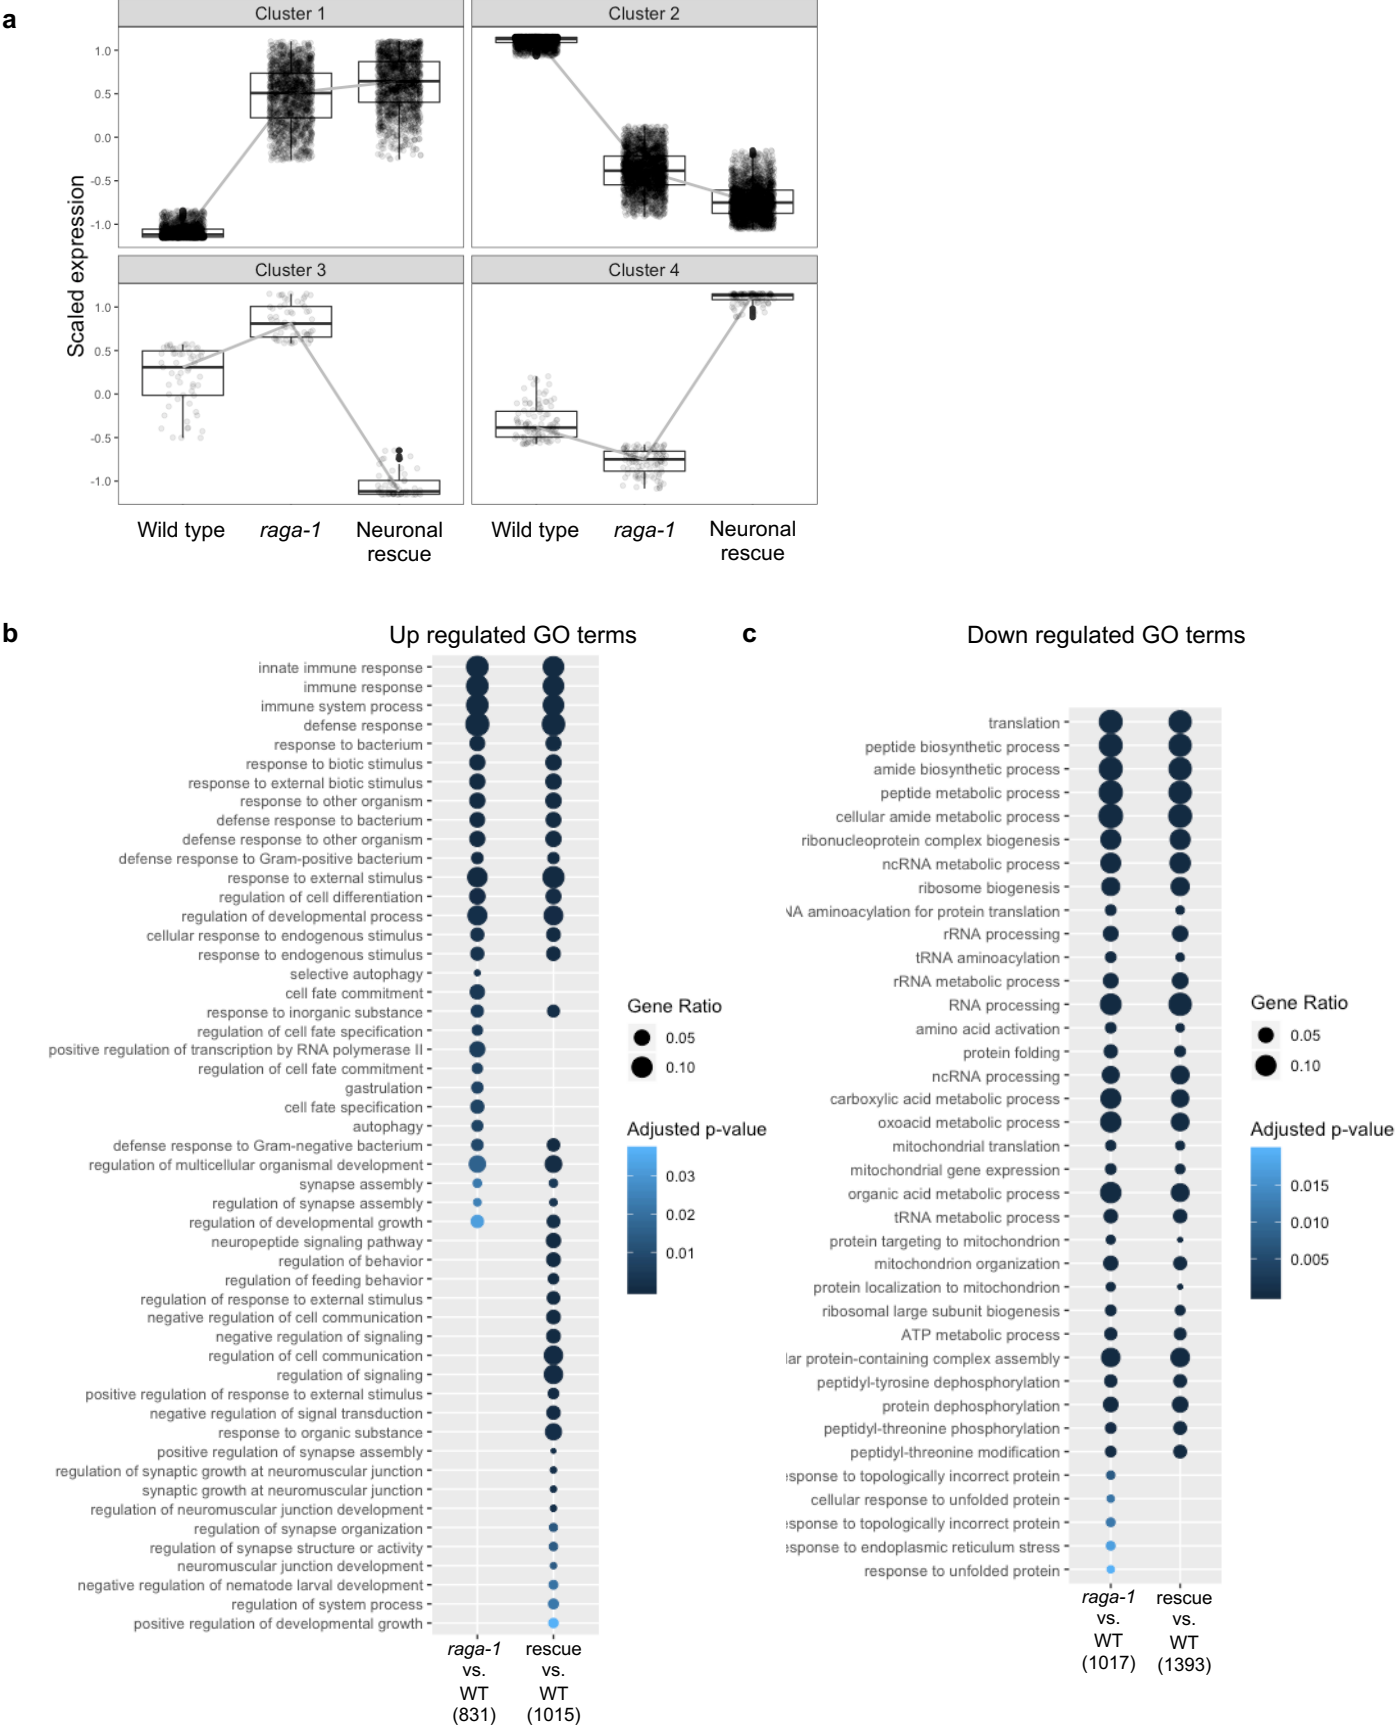

Supplement: supp [file elife-49158-supp-v1.zip › elife_poa_e49158_Figure_3_figure_supplement_1.pdf]

Figure 2—figure supplement 2

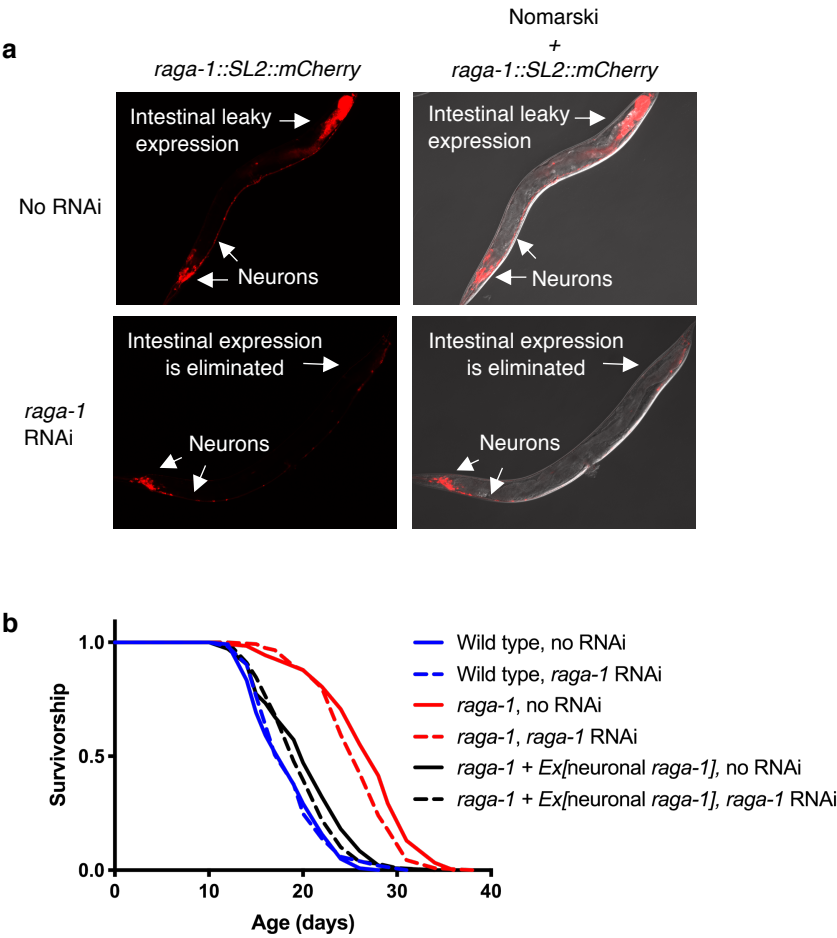

Supplement: supp [file elife-49158-supp-v1.zip › elife_poa_e49158_Figure_2_figure_supplement_2.pdf]

Figure 3—figure supplement 3

*ins-6* in day 1 adults

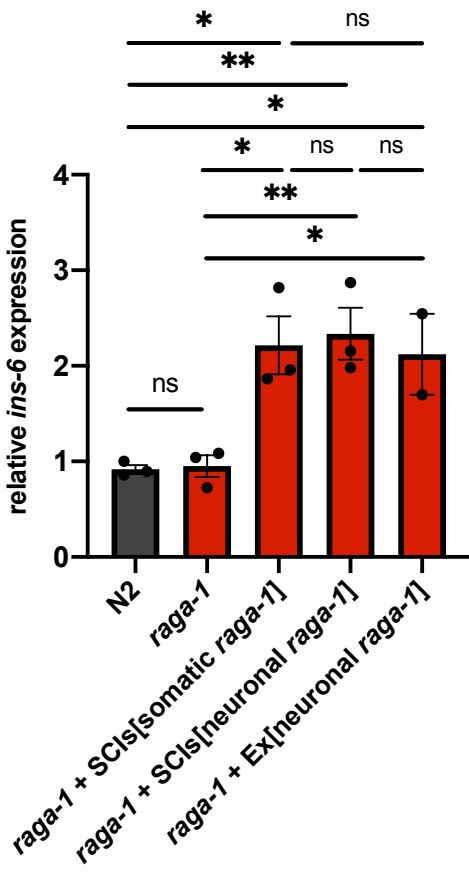

Supplement: supp [file elife-49158-supp-v1.zip › elife_poa_e49158_Figure_3_figure_supplement_3.pdf]

Figure 4—figure supplement 6

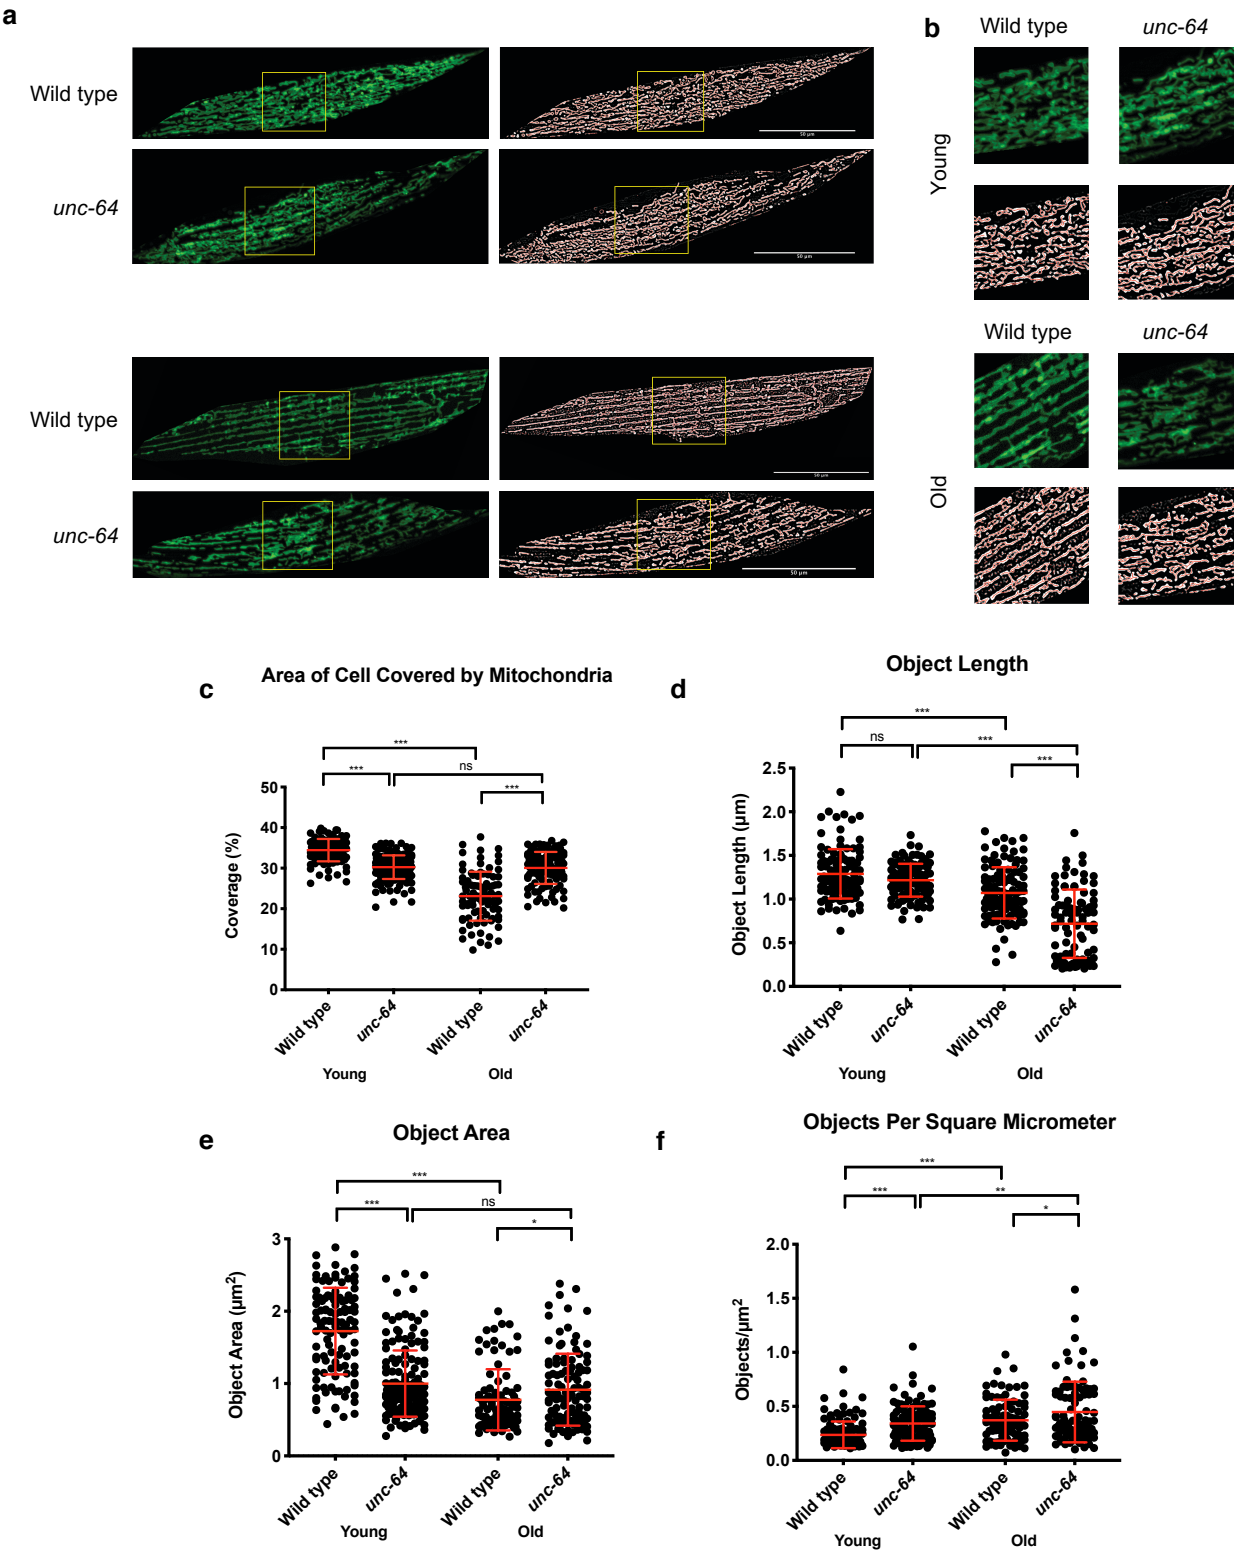

Supplement: supp [file elife-49158-supp-v1.zip › elife_poa_e49158_Figure_4_figure_supplement_6.pdf]

Figure 2—figure supplement 1

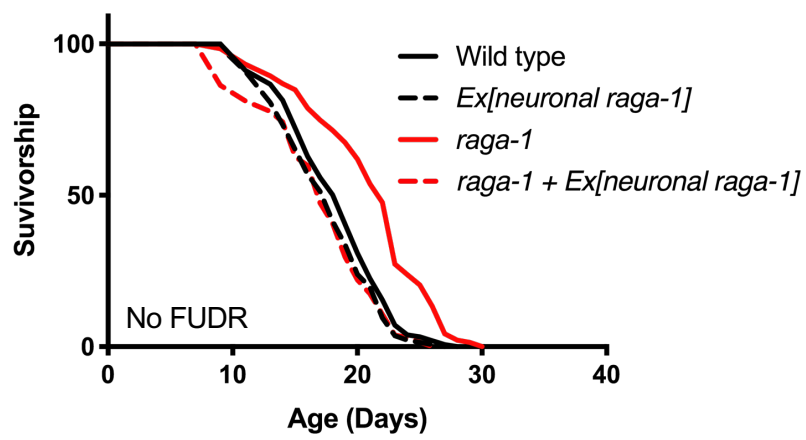

Supplement: supp [file elife-49158-supp-v1.zip › elife_poa_e49158_Figure_2_figure_supplement_1.pdf]

Figure 3—figure supplement 2

**C28A5.2**

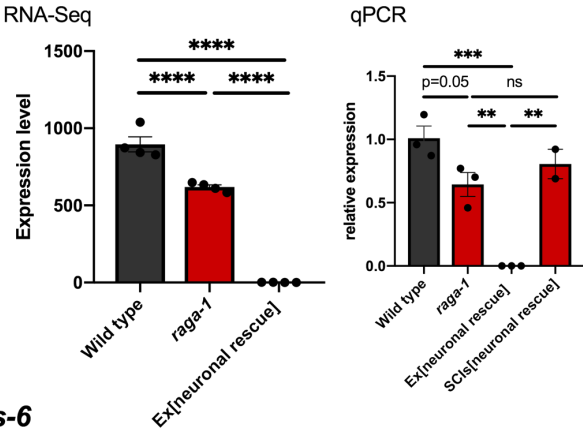

**ugt-31**

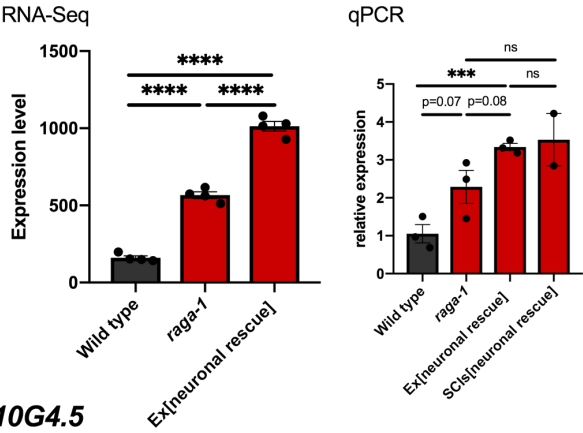

**ins-6**

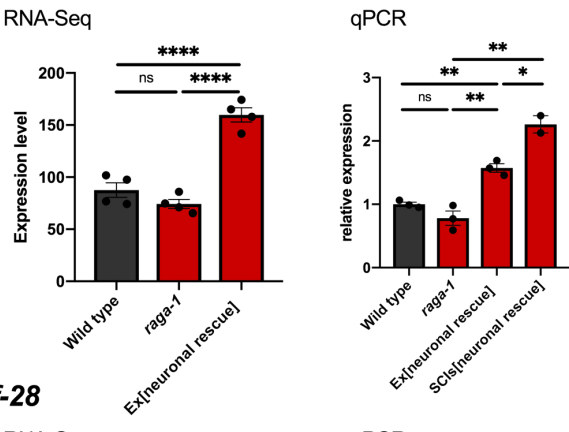

**K10G4.5**

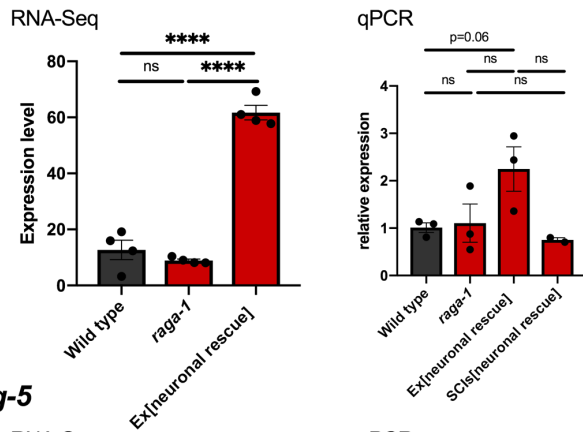

**daf-28**

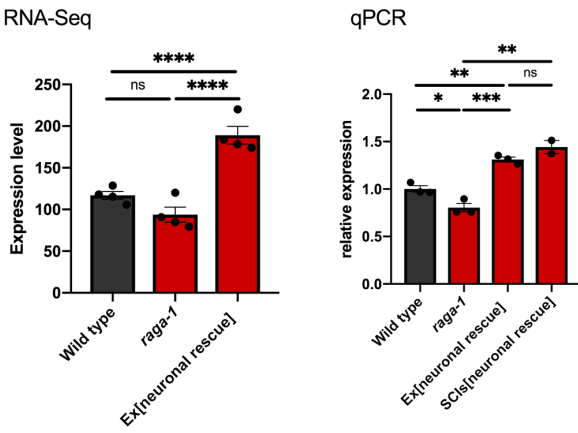

**irg-5**

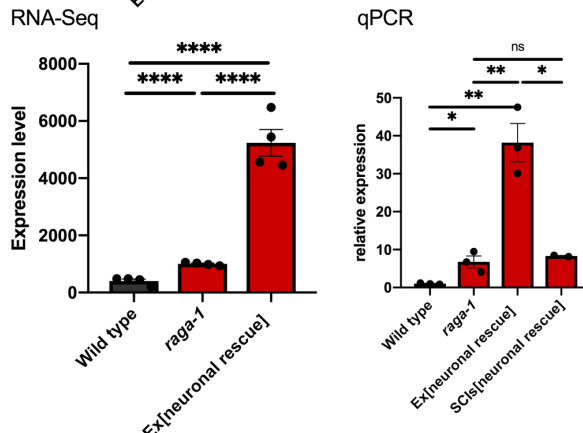

Supplement: supp [file elife-49158-supp-v1.zip › elife_poa_e49158_Figure_3_figure_supplement_2.pdf]

Figure 4—figure supplement 4

a

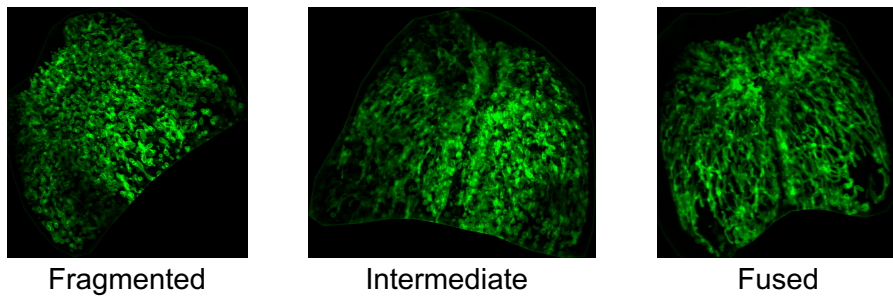

b

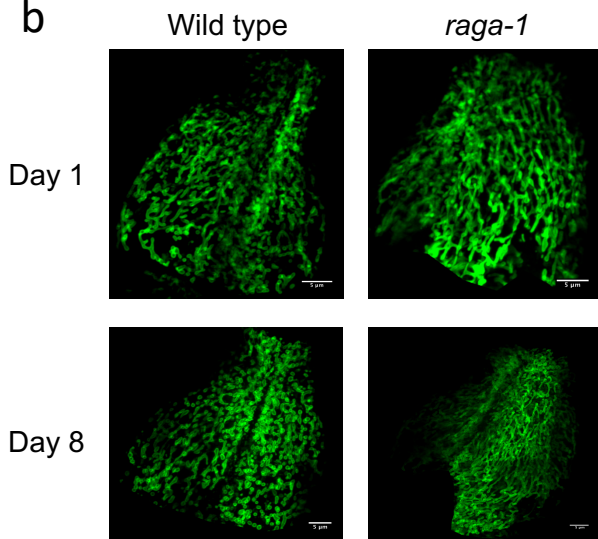

c

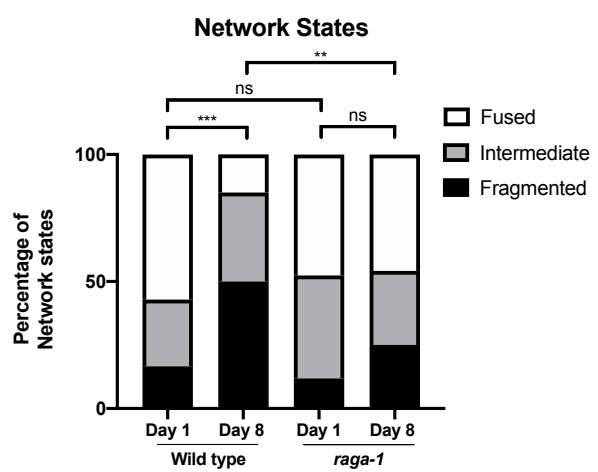

Supplement: supp [file elife-49158-supp-v1.zip › elife_poa_e49158_Figure_4_figure_supplement_4.pdf]

Figure 4—figure supplement 3

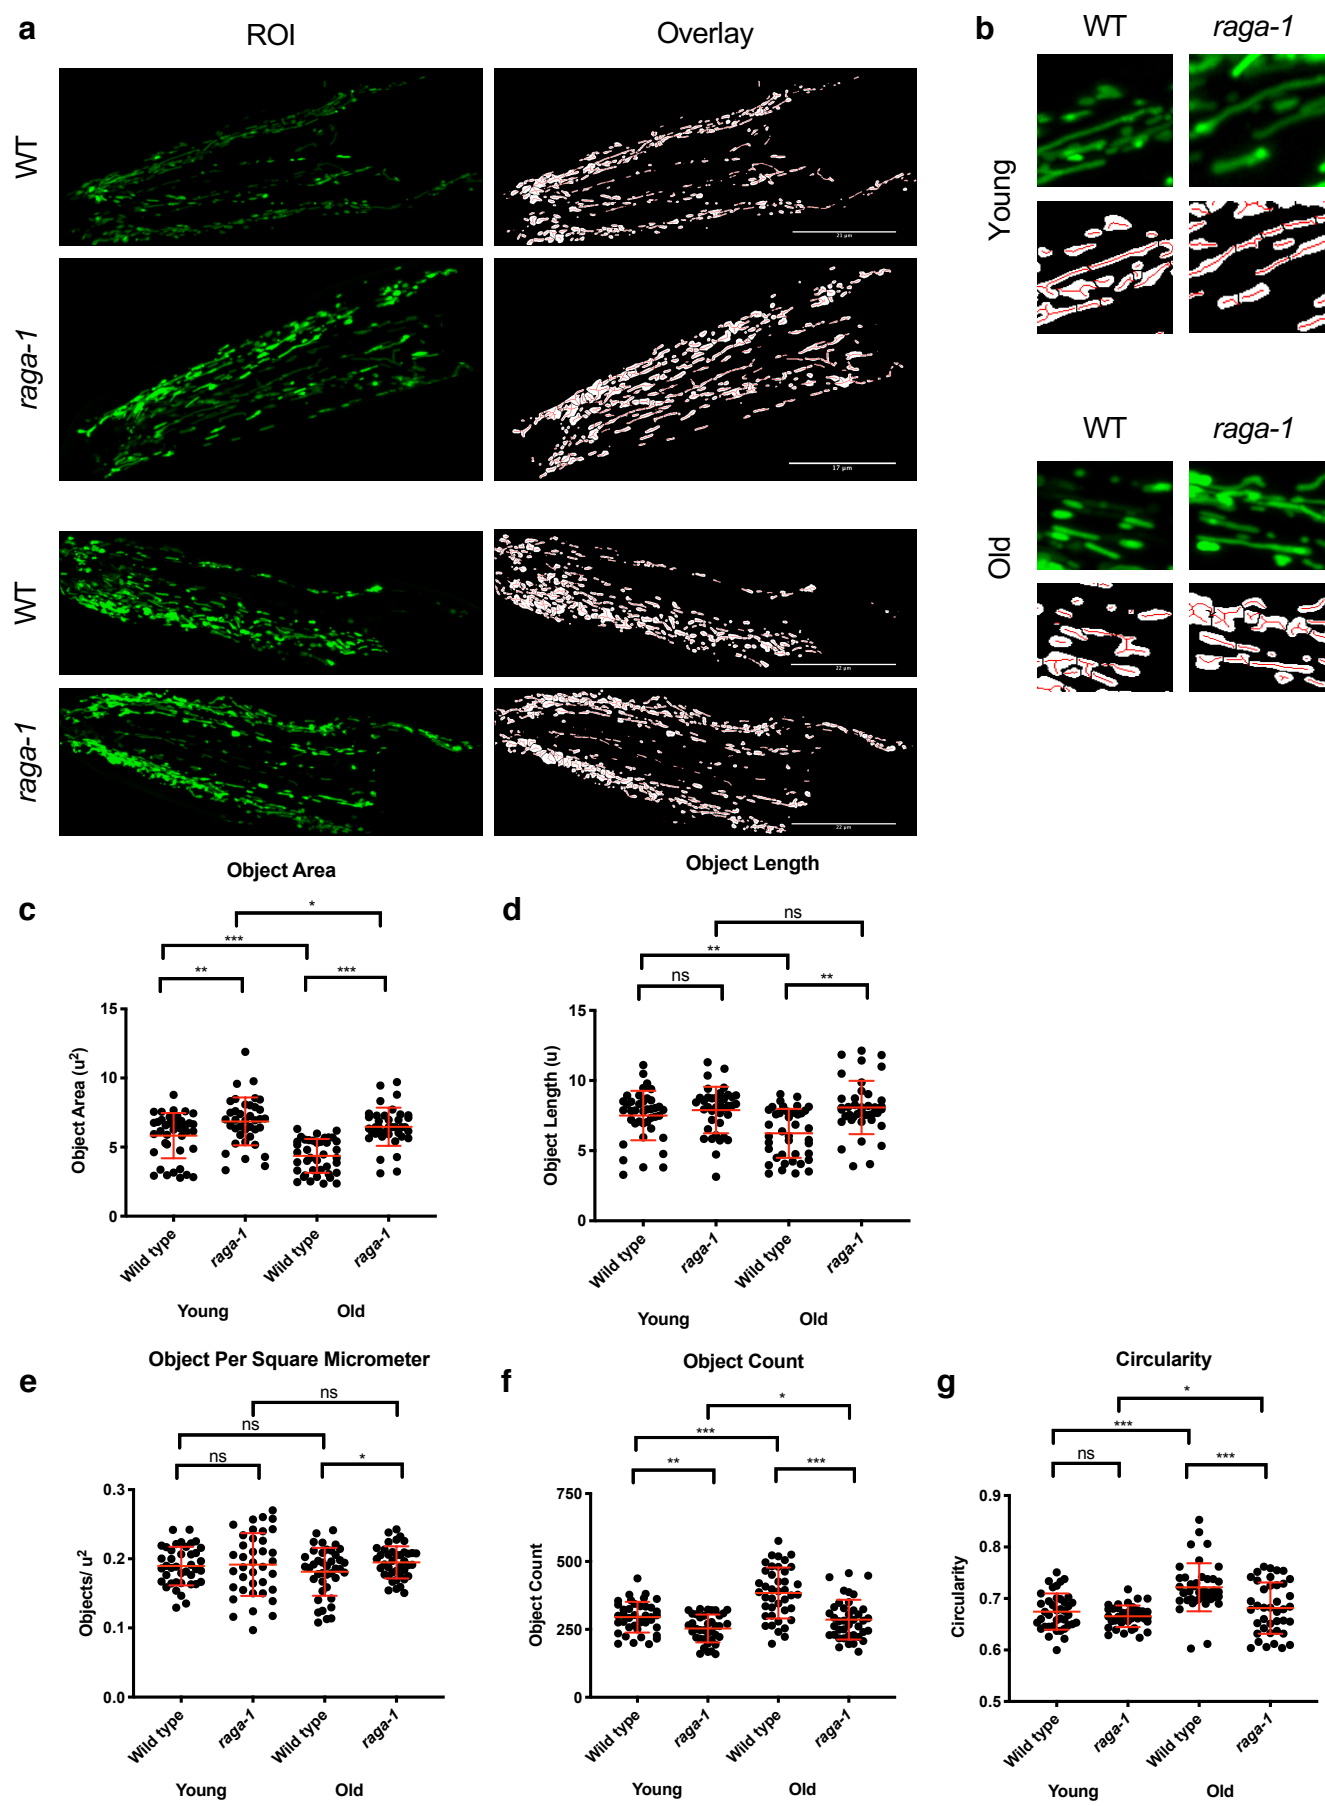

Supplement: supp [file elife-49158-supp-v1.zip › elife_poa_e49158_Figure_4_figure_supplement_3.pdf]

Figure 4— figure supplement 2

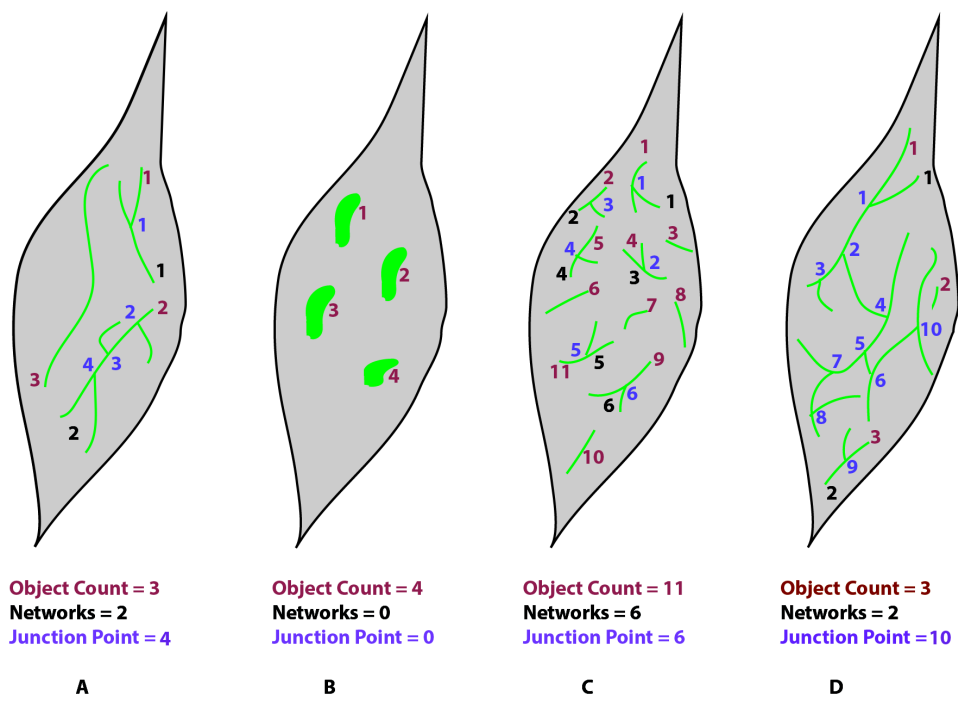

Supplement: supp [file elife-49158-supp-v1.zip › elife_poa_e49158_Figure_4_figure_supplement_2.pdf]

Figure 5—figure supplement 1

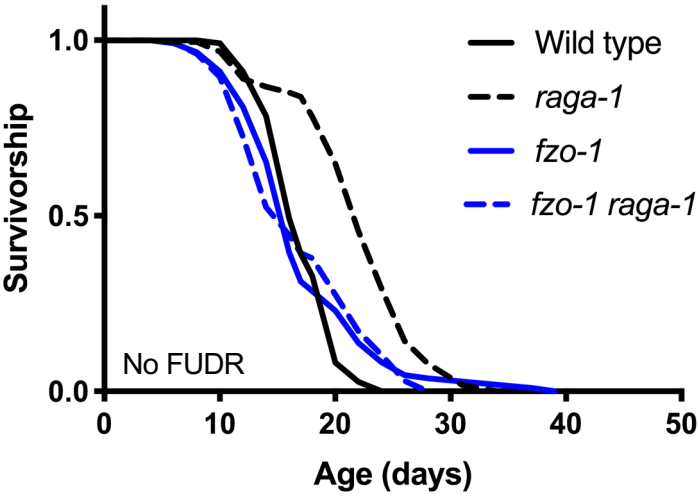

Supplement: supp [file elife-49158-supp-v1.zip › elife_poa_e49158_Figure_5_figure_supplement_1.pdf]

Figure 4—figure supplement 5

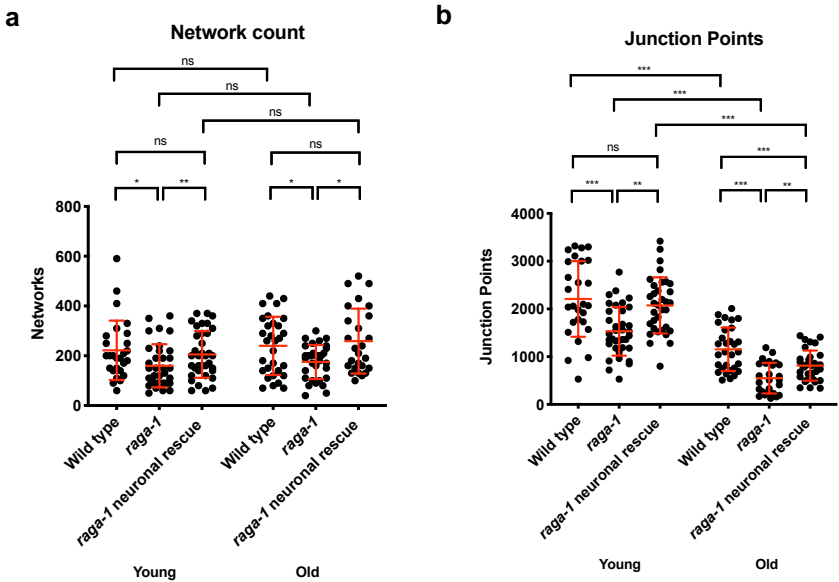

Supplement: supp [file elife-49158-supp-v1.zip › elife_poa_e49158_Figure_4_figure_supplement_5.pdf]
